# Supplementary material for: Compatibility of Distinct Label-Free Proteomic Workflows in Absolute Quantification of Proteins Linked to the Oocyte Quality in Human Follicular Fluid
Source: MDPI journal article supplement (doi:10.3390/ijms22147415), 2021-07-10
Supplement: s1 [file s1]

# Compatibility of distinct label-free proteomic workflows in determination of proteins linked to the oocyte quality in human follicular fluid

*Aleksandra E. Lewandowska<sup>\*,1</sup>, Anna Fel<sup>1</sup>, Marcel Thiel<sup>1</sup>, Paulina Czaplewska<sup>1</sup>, Krzysztof Łukaszuk<sup>2,3</sup>, Jacek R. Wiśniewski<sup>4</sup>, Stanisław Ołdziej<sup>\*,1</sup>*

1 Intercollegiate Faculty of Biotechnology UG&MUG, University of Gdańsk, Abrahama 58, 80-307 Gdańsk, Gdańsk, Poland.

2 INVICTA Fertility and Reproductive Center, Polna 64, 81-740 Sopot, Sopot, Poland.

3 Department of Obstetrics and Gynecological Nursing, Faculty of Health Sciences, Medical University of Gdańsk, Dębinki 7, 80-211 Gdańsk, Gdańsk, Poland.

4 Department of Proteomics and Signal Transduction, Max-Planck-Institute of Biochemistry, Am Klopferspitz 18, 82152 Martinsried, Germany.

\* Corresponding author

## Supporting Information

### TABLE OF CONTENTS:

#### Supporting Material 1 (PDF file):

**Figure S1.** Interaction networks of proteins identified in LMW fraction generated in STRING.

**Figure S2, 3.** Multiscatter plots displaying correlations of all clinical samples in quantitative workflows.

**Figure S4.** Pearson correlation of concentration changes measured by both quantitative methods for each protein in the full set of samples and in the set excluding the P1F2 sample.

**Figure S5.** Proteins determined as statistically significant by two-factor ANOVA for the factor relating to inter-patient differences in each comparison (patient-oocyte status and patient-blastocyst status) for both quantitative methods.

**Figure S6.** Interaction networks of all proteins determined as statistically significant by two-factor ANOVA for the factor relating to oocyte maturity or blastocyst status for the Quad-Orbitrap or Triple Quad-TOF workflow at 5% FDR.

#### Supporting Material 2 (XLSX file):

**Table S1.** Detailed description of the purpose and analysis workflow of all samples described in this study.

**Table S2.** List of all proteins identified by the Quad-Orbitrap workflow in pool experiments described in detail in Table S1.

**Table S3.** The results of quantitative analysis of unfractionated pool samples by the Quad-Orbitrap workflow along with TPA absolute concentration and coefficient of variation calculation.

**Table S4,5.** Functional enrichment analysis of proteins identified in HMWF and LMWF.

**Table S6.** List of all proteins identified by the Triple Quad-TOF workflow in pool experiments described in detail in Table S1.

**Table S7.** The results of quantitative analysis of unfractionated pool samples by the Triple Quad-TOF workflow along with TPA absolute concentration and coefficient of variation calculation.

**Table S8.** List of all proteins identified in the study with the literature comparison to proteomic studies of hFF and related biological materials.

**Table S9.** Assignment of clinical samples to analyzed groups.

**Table S10,11.** The results of quantitative analysis of clinical samples by both workflows.

**Table S12.** Pearson correlation calculated for each sample comparison in both workflows.

**Table S13.** Pearson correlation of both workflows for all clinical samples and excluding the P1F2 sample.

**Table S14.** The results of all conducted two-way ANOVA tests for both workflows.

**Table S15.** List of proteins determined to be statistically significant in relation to oocyte or blastocyst status by any applied quantification method, with less than 20% difference in median fold changes established by both methods.

**Supporting Material 3** (PDF file):

**Figures S7-14.** Hierarchically clustered heatmaps of Pearson correlations of proteins in groups of samples considered in Table S9 using results obtained by both quantitative workflows.

(a)

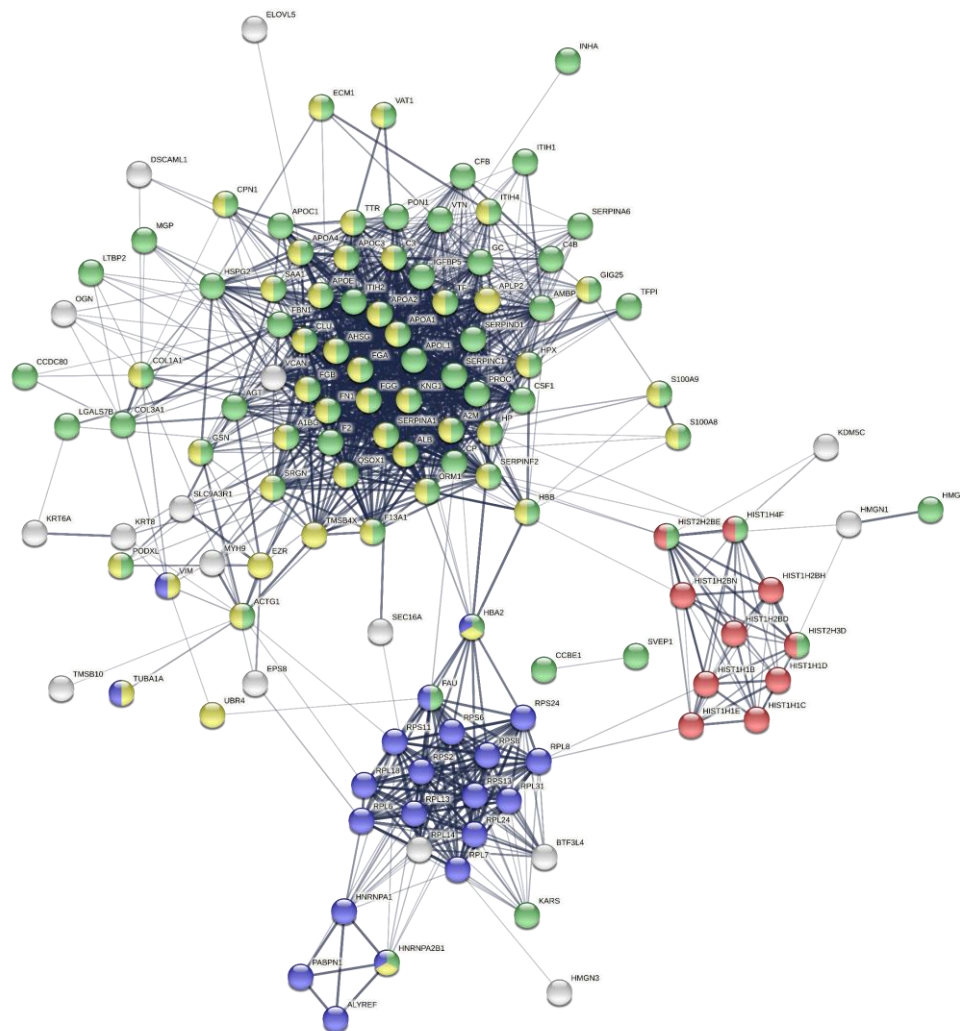

(b)

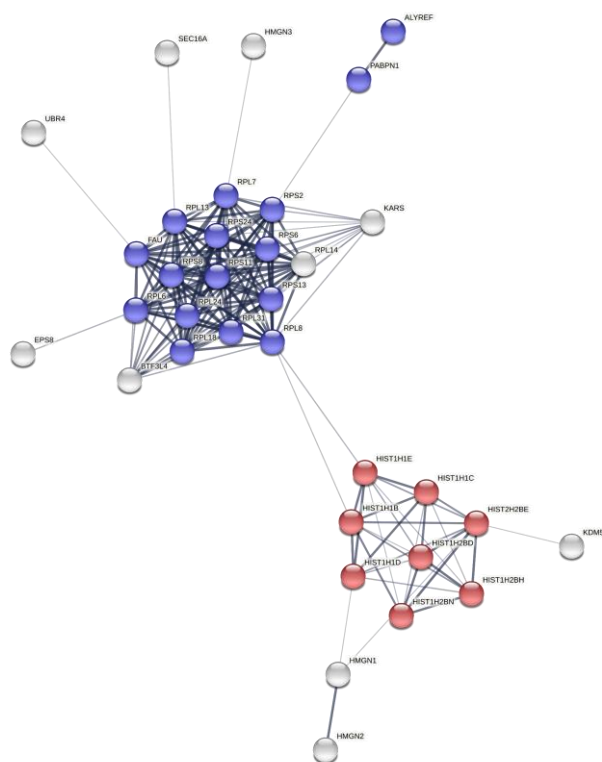

**Figure S1.** Interaction networks of proteins identified by the Quad-Orbitrap workflow in the LMW fraction generated in STRING: all identified proteins **(a)**, proteins identified exclusively in LMWF **(b)**. Nodes are colored according to their assignment to cellular component from Gene Ontology database: nucleosome (red), ribonucleoprotein complex (blue), extracellular region (green), and vesicle (yellow). Non-interacting proteins not shown.

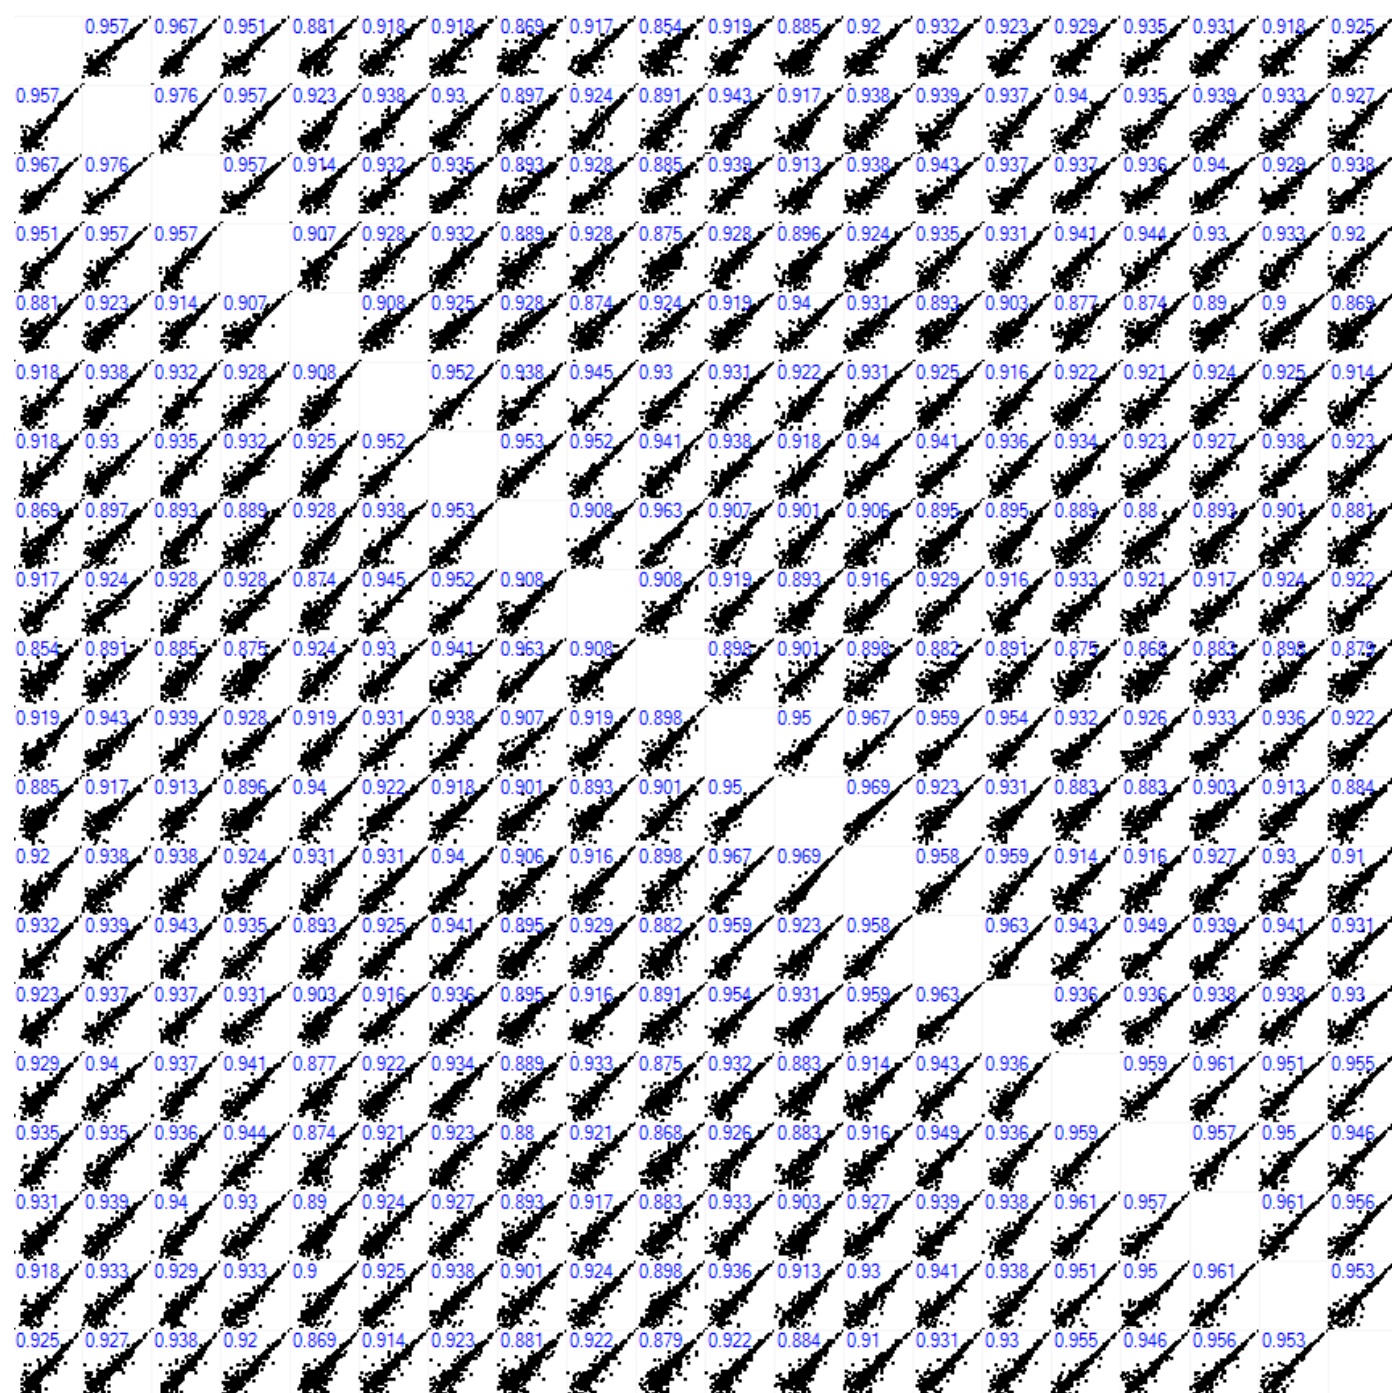

**Figure S2.** Multiscatter plots displaying correlations of all clinical samples analyzed by the Quad-Orbitrap workflow. Quantitative values were log2-transformed and missing values were imputed from normal distribution. Pearson correlations are shown for each scatter plot.

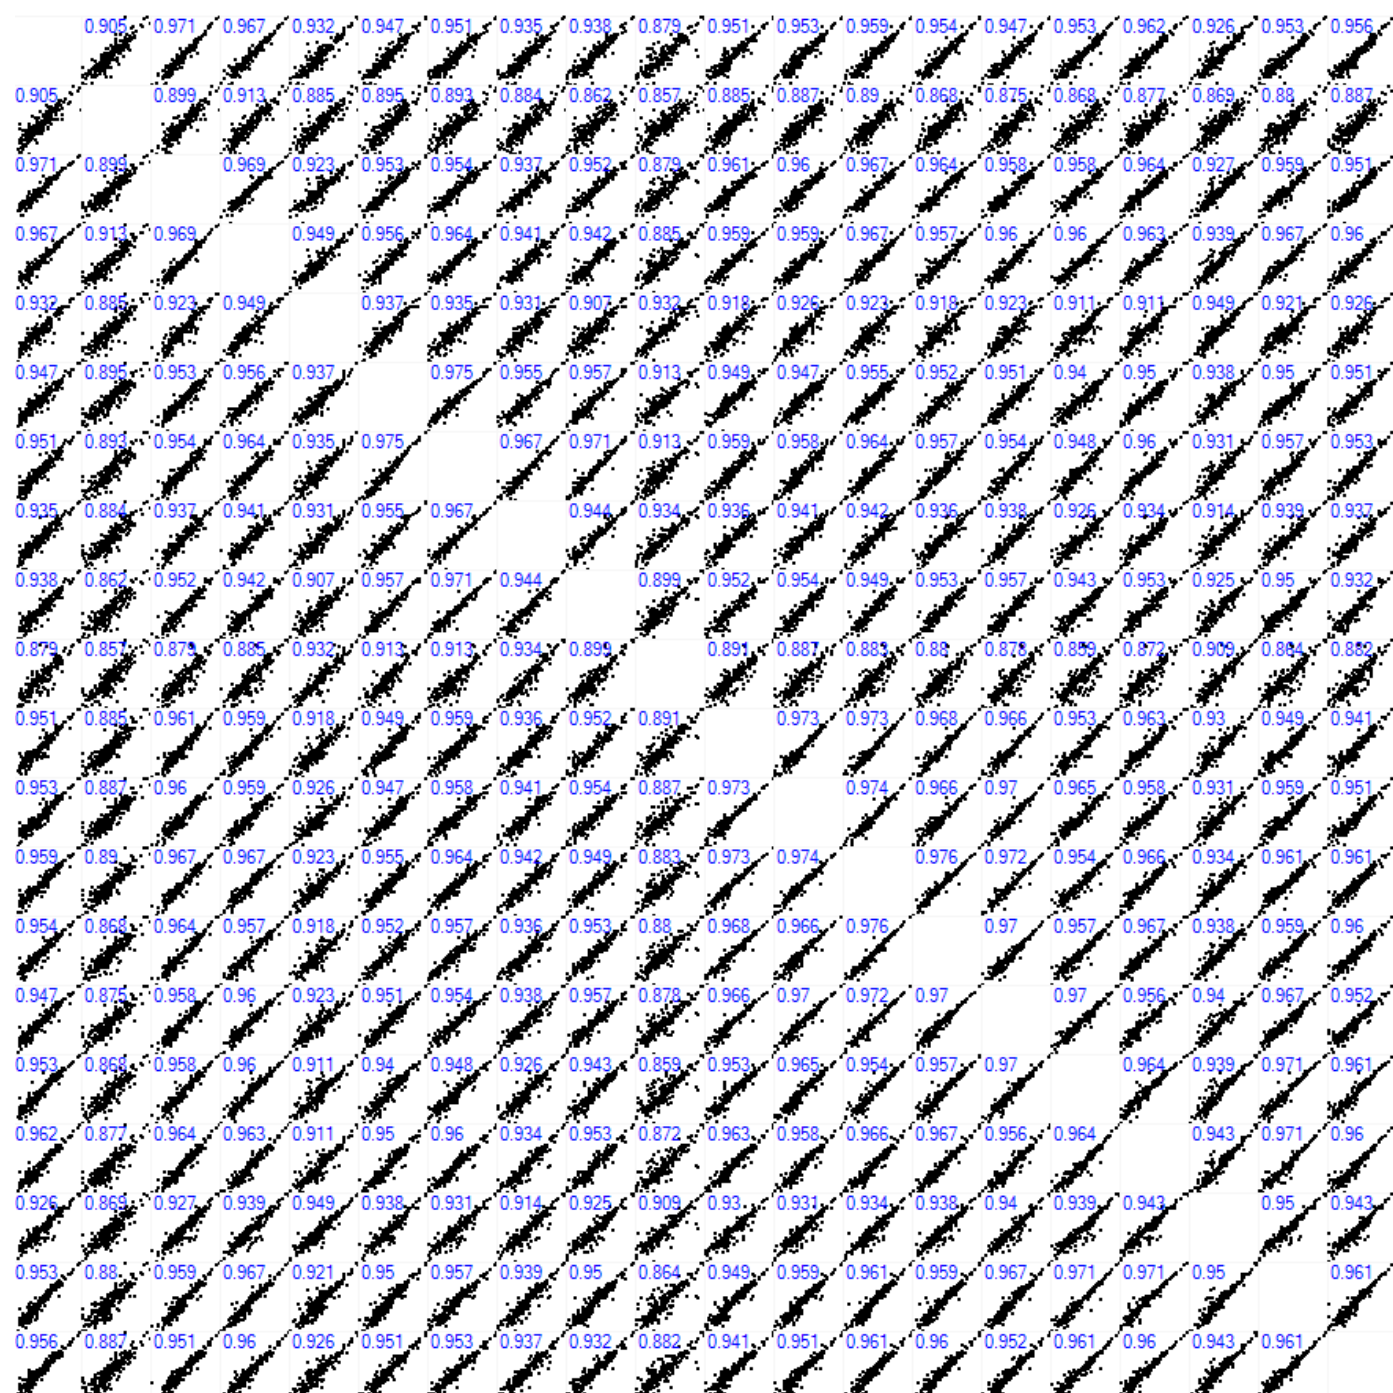

**Figure S3.** Multiscatter plots displaying correlations of all clinical samples analyzed by the Triple Quad-TOF workflow. Quantitative values were log2-transformed and missing values were imputed from normal distribution. Pearson correlations are shown for each scatter plot.

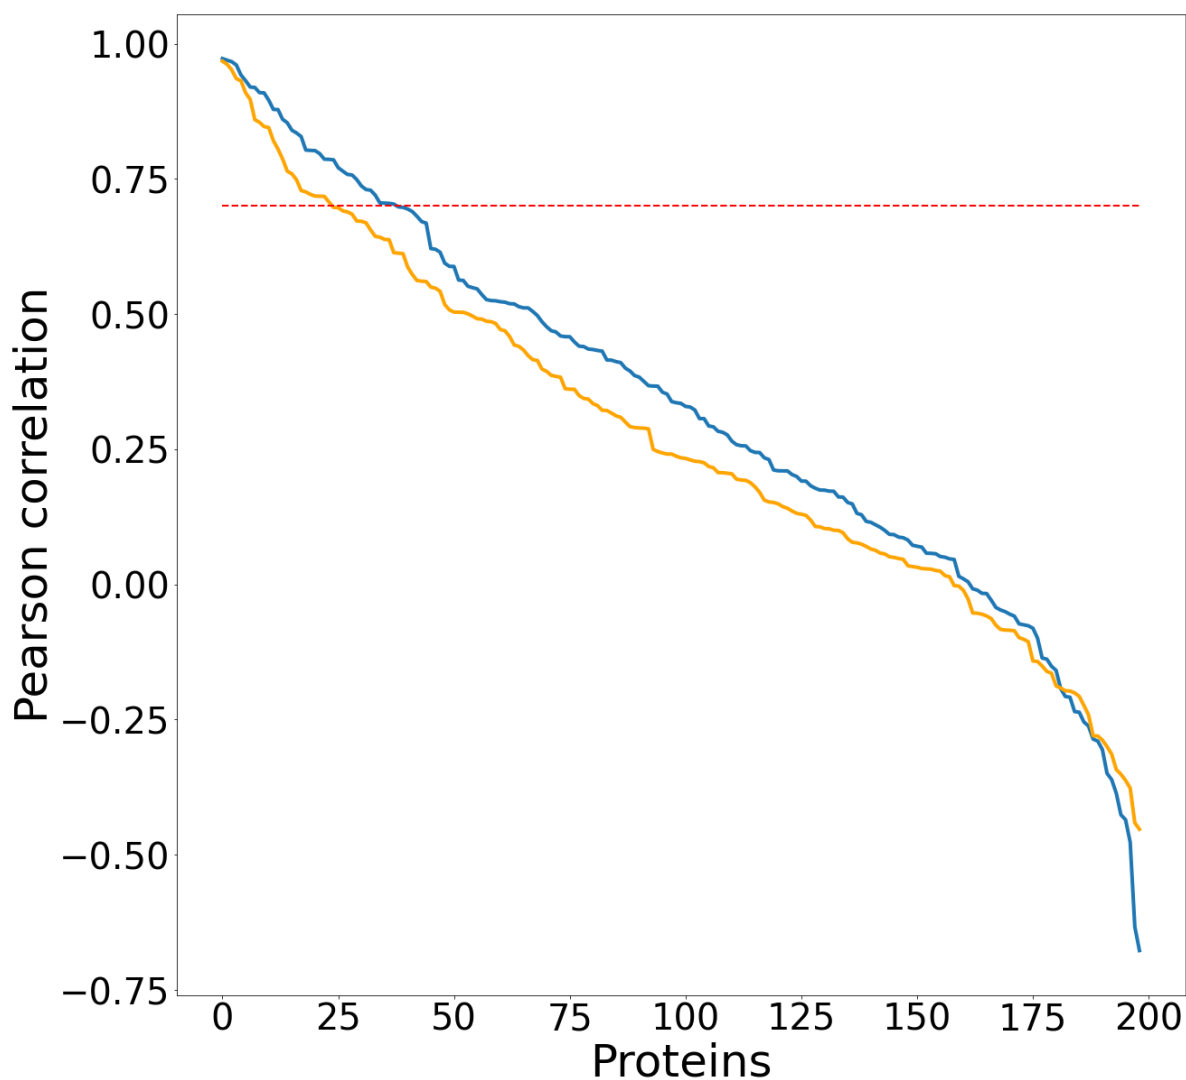

**Figure S4.** Pearson correlation of concentrations measured by both quantitative workflows for each protein in the full set of samples (orange) and in the set excluding the P1F2 sample (blue). Log2-normalized TPA concentration values were used for calculation. Dotted red line is displayed at the Pearson correlation value of 0.7.



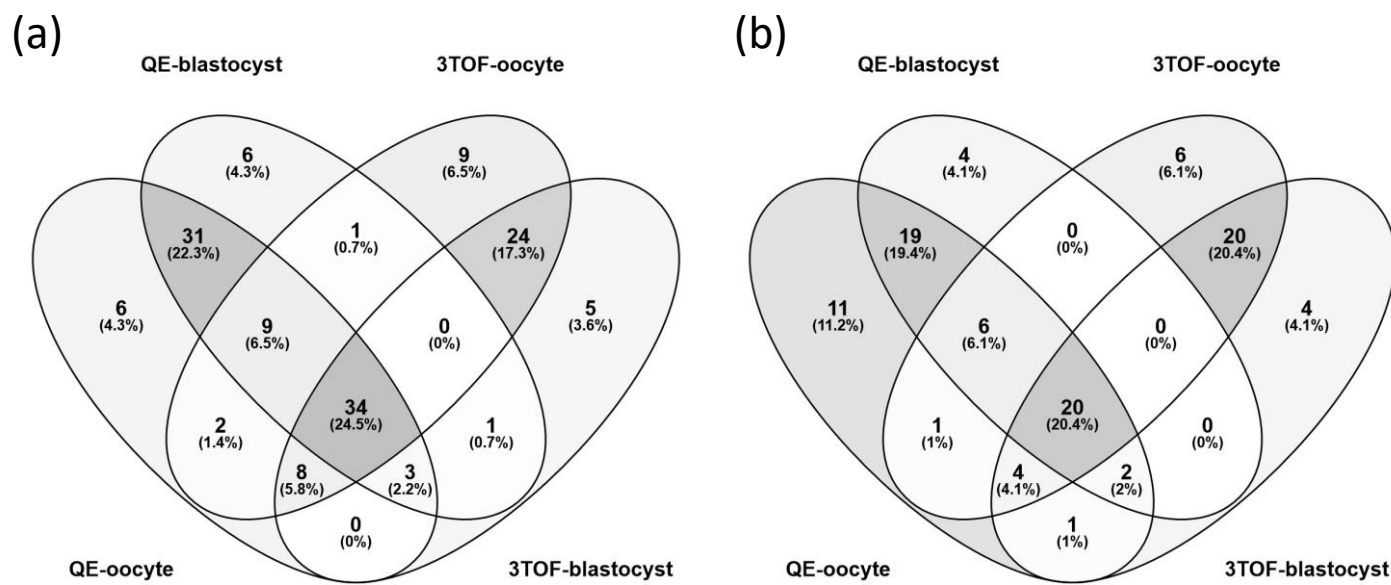

**Figure S5.** Proteins determined as statistically significant by two-factor ANOVA for the factor relating to inter-patient differences in each comparison (patient-oocyte status and patient-blastocyst status) for both quantitative workflows: **(a)** at 5% FDR, **(b)** at 1 % FDR.



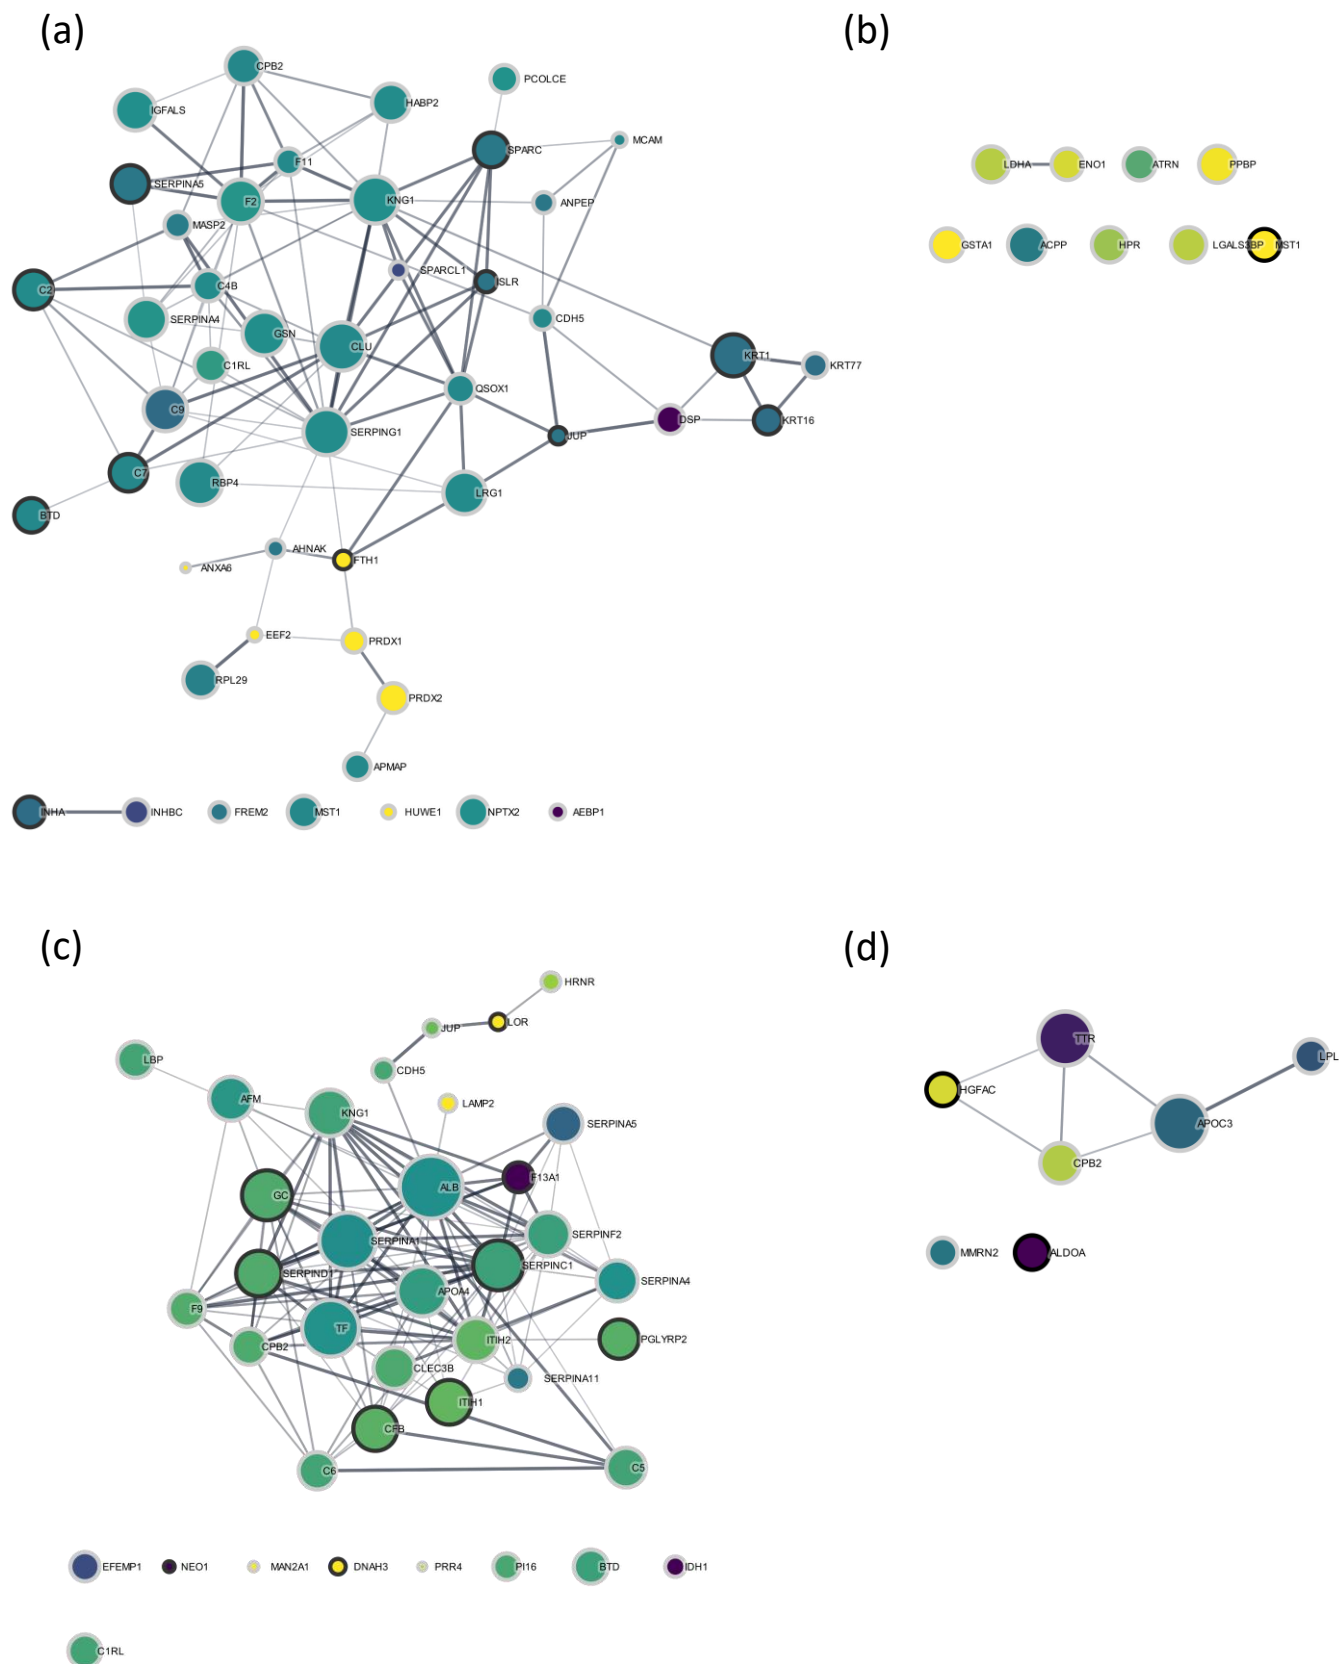

**Figure S6.** Interaction networks of all proteins determined as statistically significant by two-factor ANOVA for the factor relating to (a,b) oocyte maturity or (c,d) blastocyst development status for (a,c) Quad-Orbitrap or (b,d) Triple Quad-TOF at 5% FDR. Fill color relates to the fold change from 0.5 and below (yellow) through 1 (aquamarine) to 2 and above (purple). Node size represents log10 median abundance TPA concentrations in the test group (either mature oocyte or developed blastocyst). Black edges mark proteins statistically significant at 1% FDR.
