# Supplementary material for: Compatibility of Distinct Label-Free Proteomic Workflows in Absolute Quantification of Proteins Linked to the Oocyte Quality in Human Follicular Fluid
Source: Int J Mol Sci. 2021 Jul 10;22(14):7415. doi: 10.3390/ijms22147415 (PMC8304916; doi:10.3390/ijms22147415)
Supplement: Supplementary file 1 [file ijms-22-07415-s001.zip › SupportingMaterial2.xlsx]

## Sheet: Table S1
Table S1. Detailed description of the purpose and analysis workflow of all samples described in this study.
Sample designation	Use in experimental task	Protein fractionation	Fraction analyzed	Digestion	Peptide fractionation	Fraction analyzed	iRT standard	Mode of acquisition	Mass spectrometry setup	Number of samples (repetitions)
3TOF HFF T	Spectral library construction/ qualitative analysis	None	-	FASP with trypsin	None	-	yes	DDA	Triple TOF 5600+ coupled with microLC	1 (3)
3TOF HMW T	Spectral library construction/ qualitative analysis	Ultrafiltration	Retentate (>10 kDa)	FASP with trypsin	None	-	yes	DDA	Triple TOF 5600+ coupled with microLC	1 (3)
3TOF MF T	Spectral library construction/ qualitative analysis	Immunodepletion	Low abundant proteins (MARS-14)	FASP with trypsin	None	-	yes	DDA	Triple TOF 5600+ coupled with microLC	1 (3)
3TOF MR T	Spectral library construction/ qualitative analysis	Immunodepletion	High abundant proteins (MARS-14)	FASP with trypsin	None	-	yes	DDA	Triple TOF 5600+ coupled with microLC	1 (3)
3TOF HPLC1	Spectral library construction/ qualitative analysis	None	-	FASP with trypsin	High pH RP-HPLC	60 separate fractions	yes	DDA	Triple TOF 5600+ coupled with microLC	60 (1)
3TOF HPLC2	Spectral library construction/ qualitative analysis	Immunodepletion	Low abundant proteins (MARS-14)	FASP with trypsin	High pH RP-HPLC	60 separate fractions	yes	DDA	Triple TOF 5600+ coupled with microLC	60 (1)
3TOF HFF LTC	Qualitative analysis	None	-	MED-FASP (LysC, trypsin, chymotrypsin)	None	-	no	DDA	Triple TOF 5600+ coupled with microLC	3 (3)
3TOF HFF TC	Qualitative analysis	None	-	MED-FASP (trypsin, chymotrypsin)	None	-	no	DDA	Triple TOF 5600+ coupled with microLC	2 (3)
3TOF HFF IS	Qualitative analysis	None	-	In solution with trypsin	None	-	no	DDA	Triple TOF 5600+ coupled with microLC	1 (3)
3TOF LMW	Qualitative analysis	Ultrafiltration	Filtrate (<10 kDa)	None	None	-	no	DDA	Triple TOF 5600+ coupled with microLC	1 (3)
QE HFF LTC	Qualitative analysis/ Quantification	None	-	MED-FASP (LysC, trypsin, chymotrypsin)	None	-	no	DDA	Q Exactive HF-X coupled with nanoLC	3 (3)
QE HMW LTC	Qualitative analysis/ Quantification	Ultrafiltration	Retentate (>10 kDa)	MED-FASP (LysC, trypsin, chymotrypsin)	None	-	no	DDA	Q Exactive HF-X coupled with nanoLC	3 (3)
QE MF LTC	Qualitative analysis/ Quantification	Immunodepletion	Low abundant proteins (MARS-14)	MED-FASP (LysC, trypsin, chymotrypsin)	None	-	no	DDA	Q Exactive HF-X coupled with nanoLC	3 (1)
QE MR LTC	Qualitative analysis/ Quantification	Immunodepletion	High abundant proteins (MARS-14)	MED-FASP (LysC, trypsin, chymotrypsin)	None	-	no	DDA	Q Exactive HF-X coupled with nanoLC	3 (1)
QE HFF IS	Qualitative analysis/ Quantification	None	-	In solution with trypsin	None	-	no	DDA	Q Exactive HF-X coupled with nanoLC	1 (3)
QE LMW	Qualitative analysis	Ultrafiltration	Filtrate (<10 kDa)	None	None	-	no	DDA	Q Exactive HF-X coupled with nanoLC	1 (2)
3TOF HFF T	Quantification	None	-	FASP with trypsin	None	-	yes	DIA	Triple TOF 5600+ coupled with microLC	1 (3)
3TOF HMW T	Quantification	Ultrafiltration	Retentate (>10 kDa)	FASP with trypsin	None	-	yes	DIA	Triple TOF 5600+ coupled with microLC	1 (3)
3TOF HFF LTC	Quantification	None	-	MED-FASP (LysC, trypsin, chymotrypsin)	None	-	yes	DIA	Triple TOF 5600+ coupled with microLC	1 (3)
3TOF HFF IS	Quantification	None	-	In solution with trypsin	None	-	yes	DIA	Triple TOF 5600+ coupled with microLC	1 (3)
Clinical samples	Quantification/ pilot study	None	-	FASP with trypsin	None	-	yes	DIA	Triple TOF 5600+ coupled with microLC	20 (3)
Clinical samples	Quantification/ pilot study	None	-	MED-FASP (LysC, trypsin, chymotrypsin)	None	-	no	DDA	Q Exactive HF-X coupled with nanoLC	60 (1)

## Sheet: Table S2
Table S2. List of all proteins identified by the Quad-Orbitrap workflow in pool experiments described in detail in Table S1.
N	Uniprot ID	Protein name	HFF LTC	HMW LTC	MF LTC	MR LTC	HFF IS	LMW
1	P02768	Serum albumin	+	+	+	+	+	+
2	P01024	Complement C3	+	+	+	+	+	+
3	P02787	Serotransferrin	+	+	+	+	+	+
4	P0C0L4	Complement C4-A	+	+	+	+	+	-
5	P00450	Ceruloplasmin	+	+	+	+	+	+
6	P01023	Alpha-2-macroglobulin	+	+	-	+	+	+
7	P01009	Alpha-1-antitrypsin	+	+	+	+	+	+
8	P01857	Immunoglobulin heavy constant gamma 1	+	+	+	+	+	+
9	P00738	Haptoglobin	+	+	+	+	+	+
10	P98160	Basement membrane-specific heparan sulfate proteoglycan core protein	+	+	+	+	+	+
11	Q14624	Inter-alpha-trypsin inhibitor heavy chain H4	+	+	+	+	+	+
12	P08603	Complement factor H	+	+	+	+	+	-
13	P02647	Apolipoprotein A-I	+	+	+	+	+	+
14	P00751	Complement factor B	+	+	+	+	+	+
15	P01008	Antithrombin-III	+	+	+	+	+	+
16	P02774	Vitamin D-binding protein	+	+	+	+	+	+
17	P02790	Hemopexin	+	+	+	+	+	+
18	P19823	Inter-alpha-trypsin inhibitor heavy chain H2	+	+	+	+	+	+
19	P06727	Apolipoprotein A-IV	+	+	+	+	+	+
20	P01011	Alpha-1-antichymotrypsin	+	+	+	+	+	+
21	P02675	Fibrinogen beta chain	+	+	+	+	+	+
22	P02671	Fibrinogen alpha chain	+	+	+	+	+	+
23	P01019	Angiotensinogen	+	+	+	+	+	+
24	P00747	Plasminogen	+	+	+	+	+	-
25	P00734	Prothrombin	+	+	+	+	+	+
26	P06396	Gelsolin	+	+	+	+	+	+
27	P01876	Immunoglobulin heavy constant alpha 1	+	+	-	+	+	+
28	P19827	Inter-alpha-trypsin inhibitor heavy chain H1	+	+	+	+	+	+
29	P04217	Alpha-1B-glycoprotein	+	+	+	+	+	+
30	P02679	Fibrinogen gamma chain	+	+	+	+	+	+
31	P10909	Clusterin	+	+	+	+	+	+
32	P02652	Apolipoprotein A-II	+	+	+	+	+	+
33	P01859	Immunoglobulin heavy constant gamma 2	+	+	-	+	+	+
34	P02749	Beta-2-glycoprotein 1	+	+	+	+	+	-
35	P43652	Afamin	+	+	+	+	+	-
36	P01042	Kininogen-1	+	+	+	+	+	+
37	P01834	Immunoglobulin kappa constant	+	+	+	+	+	+
38	P02765	Alpha-2-HS-glycoprotein	+	+	+	+	+	+
39	P36955	Pigment epithelium-derived factor	+	+	+	+	+	-
40	P04004	Vitronectin	+	+	+	+	+	+
41	P02763	Alpha-1-acid glycoprotein 1	+	+	-	+	+	+
42	P02748	Complement component C9	+	+	+	+	+	-
43	P08697	Alpha-2-antiplasmin	+	+	+	+	+	+
44	P01871	Immunoglobulin heavy constant mu	+	+	-	+	+	-
45	P04196	Histidine-rich glycoprotein	+	+	+	+	+	-
46	P05155	Plasma protease C1 inhibitor	+	+	+	+	+	-
47	P68871	Hemoglobin subunit beta	+	+	+	+	+	+
48	P05546	Heparin cofactor 2	+	+	+	+	+	+
49	P0DOY3	Immunoglobulin lambda constant 3	-	-	-	-	-	+
50	P25311	Zinc-alpha-2-glycoprotein	+	+	+	+	+	-
51	P27169	Serum paraoxonase/arylesterase 1	+	+	+	+	+	+
52	P02766	Transthyretin	+	+	+	+	+	+
53	P19652	Alpha-1-acid glycoprotein 2	+	+	-	+	+	-
54	P02751	Fibronectin	+	+	+	+	+	+
55	P05090	Apolipoprotein D	+	+	+	+	+	-
56	P08185	Corticosteroid-binding globulin	+	+	+	+	+	+
57	P01780	Immunoglobulin heavy variable 3-7	+	+	-	+	+	-
58	P01031	Complement C5	+	+	+	+	+	-
59	P69905	Hemoglobin subunit alpha	+	+	+	+	+	+
60	P01611	Immunoglobulin kappa variable 1D-12	-	-	-	-	+	-
61	P02753	Retinol-binding protein 4	+	+	+	+	+	-
62	P0DP03	Immunoglobulin heavy variable 3-30-5	-	-	-	-	-	+
63	P04264	Keratin, type II cytoskeletal 1	+	+	+	+	+	-
64	P01619	Immunoglobulin kappa variable 3-20	+	+	-	+	+	+
65	P02656	Apolipoprotein C-III	+	+	+	+	+	+
66	P01860	Immunoglobulin heavy constant gamma 3	+	+	+	+	+	-
67	P02760	Protein AMBP	+	+	+	+	+	+
68	P29622	Kallistatin	+	+	+	+	+	-
69	P06681	Complement C2	+	+	+	+	+	-
70	Q96PD5	N-acetylmuramoyl-L-alanine amidase	+	+	+	+	+	-
71	P02654	Apolipoprotein C-I	+	+	+	+	+	+
72	P05156	Complement factor I	+	+	+	+	+	-
73	P05543	Thyroxine-binding globulin	+	+	+	+	+	-
74	P07357	Complement component C8 alpha chain	+	+	+	+	+	-
75	P02743	Serum amyloid P-component	+	+	+	+	+	-
76	P20742	Pregnancy zone protein	+	+	+	+	+	-
77	P02750	Leucine-rich alpha-2-glycoprotein	+	+	+	+	+	-
78	P03952	Plasma kallikrein	+	+	+	+	+	-
79	P35858	Insulin-like growth factor-binding protein complex acid labile subunit	+	+	+	+	+	-
80	P06312	Immunoglobulin kappa variable 4-1	+	+	-	+	+	+
81	P00748	Coagulation factor XII	+	+	+	+	+	-
82	P05452	Tetranectin	+	+	+	+	+	-
83	P01594	Immunoglobulin kappa variable 1-33	+	+	-	+	+	-
84	A0A0C4DH31	Immunoglobulin heavy variable 1-18	+	+	-	+	+	-
85	P04278	Sex hormone-binding globulin	+	+	+	+	+	-
86	P01714	Immunoglobulin lambda variable 3-19	+	+	-	+	+	-
87	P01615	Immunoglobulin kappa variable 2D-28	+	+	-	+	+	-
88	O95445	Apolipoprotein M	+	+	+	+	+	-
89	P04433	Immunoglobulin kappa variable 3-11	+	+	-	+	+	-
90	P02649	Apolipoprotein E	+	+	+	+	+	+
91	P13645	Keratin, type I cytoskeletal 10	+	+	+	+	-	-
92	P80748	Immunoglobulin lambda variable 3-21	+	+	-	+	+	-
93	P01718	Immunoglobulin lambda variable 3-27	-	+	-	-	+	-
94	P13671	Complement component C6	+	+	+	+	+	-
95	P01700	Immunoglobulin lambda variable 1-47	+	+	-	+	+	-
96	A0A0C4DH69	Immunoglobulin kappa variable 1-9	+	+	-	-	-	-
97	B9A064	Immunoglobulin lambda-like polypeptide 5	+	+	-	+	+	-
98	P07358	Complement component C8 beta chain	+	+	+	+	+	-
99	P07093	Glia-derived nexin	+	+	+	+	+	-
100	P01861	Immunoglobulin heavy constant gamma 4	+	+	-	+	+	-
101	P01624	Immunoglobulin kappa variable 3-15	+	+	-	+	-	-
102	A0A075B6I9	Immunoglobulin lambda variable 7-46	+	+	-	+	-	-
103	P35542	Serum amyloid A-4 protein	+	+	-	+	+	-
104	P0C0L5	Complement C4-B	+	+	+	+	+	+
105	P00739	Haptoglobin-related protein	+	+	-	+	+	-
106	P01877	Immunoglobulin heavy constant alpha 2	+	+	-	+	+	-
107	P01602	Immunoglobulin kappa variable 1-5	+	+	-	+	+	-
108	A0A0A0MS15	Immunoglobulin heavy variable 3-49	+	+	-	+	+	-
109	P04114	Apolipoprotein B-100	+	+	+	+	+	-
110	P01033	Metalloproteinase inhibitor 1	+	+	+	+	+	-
111	P07360	Complement component C8 gamma chain	+	+	+	+	+	-
112	A0A075B6I0	Immunoglobulin lambda variable 8-61	+	+	-	+	+	-
113	P36980	Complement factor H-related protein 2	+	+	+	+	+	-
114	P35527	Keratin, type I cytoskeletal 9	+	+	+	+	+	-
115	Q9NZP8	Complement C1r subcomponent-like protein	+	+	+	+	+	-
116	P02741	C-reactive protein	+	+	+	-	+	-
117	P10643	Complement component C7	+	+	+	+	+	-
118	P51884	Lumican	+	+	+	+	+	-
119	P02655	Apolipoprotein C-II	+	+	-	+	+	-
120	Q14520	Hyaluronan-binding protein 2	+	+	+	+	+	-
121	Q66K66	Transmembrane protein 198	+	+	-	+	+	-
122	P04432	Immunoglobulin kappa variable 1D-39	+	+	-	+	+	+
123	P01743	Immunoglobulin heavy variable 1-46	+	+	-	+	+	-
124	P18428	Lipopolysaccharide-binding protein	+	+	+	+	+	-
125	A0A087WSY6	Immunoglobulin kappa variable 3D-15	+	+	-	+	+	-
126	A0A0B4J1Y9	Immunoglobulin heavy variable 3-72	+	+	-	+	+	-
127	P01591	Immunoglobulin J chain	+	+	+	+	+	-
128	A0A075B6K5	Immunoglobulin lambda variable 3-9	+	+	-	+	+	-
129	P04211	Immunoglobulin lambda variable 7-43	-	+	-	+	-	-
130	P15309	Prostatic acid phosphatase	+	+	+	+	+	-
131	Q12884	Prolyl endopeptidase FAP	-	-	+	-	-	-
132	P05154	Plasma serine protease inhibitor	+	+	+	+	+	-
133	Q08380	Galectin-3-binding protein	+	+	+	+	+	-
134	P01880	Immunoglobulin heavy constant delta	+	+	-	+	+	-
135	Q96KN2	Beta-Ala-His dipeptidase	+	+	+	+	+	-
136	Q06033	Inter-alpha-trypsin inhibitor heavy chain H3	+	+	+	+	+	-
137	P22792	Carboxypeptidase N subunit 2	+	+	+	+	+	-
138	P00742	Coagulation factor X	+	+	+	+	+	-
139	P63261	Actin, cytoplasmic 2	-	-	+	-	-	+
140	Q16610	Extracellular matrix protein 1	+	+	+	+	+	+
141	P13611	Versican core protein	+	+	+	-	+	+
142	P15169	Carboxypeptidase N catalytic chain	+	+	+	+	+	+
143	P00740	Coagulation factor IX	+	+	+	+	+	-
144	P61769	Beta-2-microglobulin	+	+	+	+	+	-
145	P43251	Biotinidase	+	+	+	+	+	-
146	Q9UK55	Protein Z-dependent protease inhibitor	+	+	+	+	+	-
147	P03951	Coagulation factor XI	+	+	+	+	+	-
148	Q96IY4	Carboxypeptidase B2	+	+	+	+	+	-
149	P09871	Complement C1s subcomponent	+	+	+	+	+	-
150	Q9UGM5	Fetuin-B	+	+	+	+	+	-
151	O75882	Attractin	+	+	+	+	+	-
152	P07225	Vitamin K-dependent protein S	+	+	+	+	+	-
153	P08263	Glutathione S-transferase A1	+	+	+	+	+	-
154	P17936	Insulin-like growth factor-binding protein 3	+	+	+	+	+	-
155	P09486	SPARC	+	+	+	+	+	-
156	P08571	Monocyte differentiation antigen CD14	+	+	+	+	+	-
157	P04070	Vitamin K-dependent protein C	+	+	+	+	+	+
158	P00915	Carbonic anhydrase 1	+	+	+	+	+	-
159	P49908	Selenoprotein P	+	+	+	+	+	-
160	P00736	Complement C1r subcomponent	+	+	+	+	+	-
161	P60174	Triosephosphate isomerase	+	+	+	-	+	-
162	P14151	L-selectin	+	+	+	+	+	-
163	P22352	Glutathione peroxidase 3	+	+	+	+	+	-
164	Q03591	Complement factor H-related protein 1	+	+	+	+	+	-
165	O00391	Sulfhydryl oxidase 1	+	+	+	+	+	+
166	P35443	Thrombospondin-4	+	+	+	-	+	-
167	Q15848	Adiponectin	+	+	+	+	-	-
168	Q04756	Hepatocyte growth factor activator	+	+	+	+	+	-
169	P11226	Mannose-binding protein C	+	+	+	-	-	-
170	O95497	Pantetheinase	+	+	+	-	+	-
171	P24593	Insulin-like growth factor-binding protein 5	+	+	+	-	+	+
172	P22891	Vitamin K-dependent protein Z	+	+	+	-	+	-
173	P01034	Cystatin-C	+	+	+	+	+	-
174	P15151	Poliovirus receptor	+	+	+	-	+	-
175	P80108	Phosphatidylinositol-glycan-specific phospholipase D	+	+	+	+	+	-
176	Q16270	Insulin-like growth factor-binding protein 7	+	+	+	-	+	-
177	O75874	Isocitrate dehydrogenase [NADP] cytoplasmic	+	+	+	-	+	-
178	P07237	Protein disulfide-isomerase	+	-	+	-	-	-
179	P05160	Coagulation factor XIII B chain	+	+	+	+	+	-
180	P06276	Cholinesterase	+	+	+	+	+	-
181	P00746	Complement factor D	+	+	+	+	+	-
182	P13598	Intercellular adhesion molecule 2	+	+	+	+	+	-
183	P06858	Lipoprotein lipase	+	+	+	-	+	-
184	P32119	Peroxiredoxin-2	+	+	+	-	+	-
185	Q12889	Oviduct-specific glycoprotein	+	+	+	+	+	-
186	Q15582	Transforming growth factor-beta-induced protein ig-h3	+	+	+	+	+	-
187	P19883	Follistatin	+	+	+	-	-	-
188	A0A0C4DH25	Immunoglobulin kappa variable 3D-20	+	+	-	+	+	+
189	O14791	Apolipoprotein L1	+	+	+	+	+	+
190	A0A0J9YX35	Immunoglobulin heavy variable 3-64D	+	+	-	+	+	-
191	P04259	Keratin, type II cytoskeletal 6B	-	-	+	-	-	-
192	P01764	Immunoglobulin heavy variable 3-23	+	+	-	+	-	-
193	P04003	C4b-binding protein alpha chain	+	+	-	+	+	-
194	A0A075B6S5	Immunoglobulin kappa variable 1-27	+	+	-	+	+	-
195	P26927	Hepatocyte growth factor-like protein	+	+	+	+	+	-
196	P06310	Immunoglobulin kappa variable 2-30	+	+	-	+	+	-
197	P06733	Alpha-enolase	+	+	+	+	+	-
198	P23142	Fibulin-1	+	+	+	+	+	-
199	P60709	Actin, cytoplasmic 1	-	-	+	-	-	-
200	P13796	Plastin-2	+	+	+	-	+	-
201	P07437	Tubulin beta chain	+	+	-	+	-	-
202	P14618	Pyruvate kinase PKM	+	+	+	-	+	-
203	P01717	Immunoglobulin lambda variable 3-25	+	+	-	+	-	-
204	P01703	Immunoglobulin lambda variable 1-40	+	+	-	+	+	-
205	P11597	Cholesteryl ester transfer protein	+	+	-	+	+	-
206	A0A075B6R2	Immunoglobulin heavy variable 4-4	+	+	-	+	+	-
207	P0DP09	Immunoglobulin kappa variable 1-13	+	+	-	+	+	-
208	O43866	CD5 antigen-like	+	+	+	+	+	-
209	P04406	Glyceraldehyde-3-phosphate dehydrogenase	+	+	+	+	+	-
210	P12111	Collagen alpha-3(VI) chain	+	+	+	-	+	-
211	P35908	Keratin, type II cytoskeletal 2 epidermal	+	+	+	+	-	-
212	P01701	Immunoglobulin lambda variable 1-51	+	+	-	+	+	-
213	P04180	Phosphatidylcholine-sterol acyltransferase	+	+	+	+	+	-
214	P04075	Fructose-bisphosphate aldolase A	+	+	+	+	+	-
215	A0A0B4J1V0	Immunoglobulin heavy variable 3-15	+	+	-	+	+	-
216	P55058	Phospholipid transfer protein	+	+	+	+	+	-
217	P33908	Mannosyl-oligosaccharide 1,2-alpha-mannosidase IA	+	+	+	+	+	-
218	P00338	L-lactate dehydrogenase A chain	+	+	+	-	+	-
219	A0A0C4DH68	Immunoglobulin kappa variable 2-24	+	+	-	+	+	-
220	P16112	Aggrecan core protein	+	+	+	-	+	-
221	P05111	Inhibin alpha chain	+	+	+	+	+	+
222	A0A075B6S2	Immunoglobulin kappa variable 2D-29	+	+	-	+	-	-
223	Q9BXR6	Complement factor H-related protein 5	+	+	+	+	+	-
224	P62937	Peptidyl-prolyl cis-trans isomerase A	+	+	+	-	+	-
225	P00488	Coagulation factor XIII A chain	+	+	+	-	+	+
226	P01721	Immunoglobulin lambda variable 6-57	+	+	-	+	+	-
227	P02786	Transferrin receptor protein 1	+	+	-	+	+	-
228	P12259	Coagulation factor V	-	+	+	-	-	-
229	P07602	Prosaposin	+	+	+	+	-	-
230	P27918	Properdin	+	+	+	+	+	-
231	P01742	Immunoglobulin heavy variable 1-69	+	+	-	-	+	-
232	P08238	Heat shock protein HSP 90-beta	+	+	+	-	-	-
233	A0A0C4DH38	Immunoglobulin heavy variable 5-51	+	+	-	+	+	-
234	P08572	Collagen alpha-2(IV) chain	+	+	+	-	+	-
235	P39059	Collagen alpha-1(XV) chain	+	+	+	-	+	-
236	P01599	Immunoglobulin kappa variable 1-17	+	+	-	+	+	-
237	P11142	Heat shock cognate 71 kDa protein	+	+	+	-	+	-
238	Q5VTE0	Putative elongation factor 1-alpha-like 3	+	+	+	+	+	-
239	P08709	Coagulation factor VII	+	+	+	+	+	-
240	P12955	Xaa-Pro dipeptidase	+	+	+	-	-	-
241	P47972	Neuronal pentraxin-2	+	+	+	+	+	-
242	O75636	Ficolin-3	+	+	+	+	+	-
243	P14625	Endoplasmin	+	+	+	-	-	-
244	A0A0A0MT36	Immunoglobulin kappa variable 6D-21	+	+	-	-	+	-
245	A0A075B6I1	Immunoglobulin lambda variable 4-60	-	+	-	-	-	-
246	Q13822	Ectonucleotide pyrophosphatase/phosphodiesterase family member 2	+	+	+	-	+	-
247	P01614	Immunoglobulin kappa variable 2D-40	+	+	-	+	+	-
248	P01704	Immunoglobulin lambda variable 2-14	+	+	-	+	+	-
249	Q9NQ79	Cartilage acidic protein 1	+	+	+	+	+	-
250	P09211	Glutathione S-transferase P	+	+	+	-	-	-
251	P09455	Retinol-binding protein 1	+	+	+	-	+	-
252	Q16658	Fascin	+	+	+	+	+	-
253	P02746	Complement C1q subcomponent subunit B	+	+	+	+	+	-
254	P07195	L-lactate dehydrogenase B chain	+	+	+	-	+	-
255	Q9UNW1	Multiple inositol polyphosphate phosphatase 1	+	+	+	-	-	-
256	P55268	Laminin subunit beta-2	+	+	+	-	-	-
257	P08476	Inhibin beta A chain	-	+	+	-	+	-
258	P15144	Aminopeptidase N	+	+	+	-	+	-
259	P22105	Tenascin-X	+	+	+	-	+	-
260	P02745	Complement C1q subcomponent subunit A	+	+	+	+	+	-
261	P02747	Complement C1q subcomponent subunit C	+	+	+	+	+	-
262	Q15113	Procollagen C-endopeptidase enhancer 1	+	+	+	+	+	-
263	Q9UHG3	Prenylcysteine oxidase 1	+	+	-	+	+	-
264	P55072	Transitional endoplasmic reticulum ATPase	+	-	+	-	-	-
265	P19320	Vascular cell adhesion protein 1	+	+	+	-	+	-
266	Q6UXB8	Peptidase inhibitor 16	+	+	+	-	+	-
267	P01767	Immunoglobulin heavy variable 3-53	-	+	-	-	-	-
268	A0A0C4DH33	Immunoglobulin heavy variable 1-24	+	+	-	+	+	-
269	P0DP08	Immunoglobulin heavy variable 4-38-2	+	+	-	+	+	-
270	P63104	14-3-3 protein zeta/delta	+	-	+	-	-	-
271	Q12805	EGF-containing fibulin-like extracellular matrix protein 1	+	+	+	+	+	-
272	P0DP01	Immunoglobulin heavy variable 1-8	+	-	-	-	+	-
273	A0A0B4J1V6	Immunoglobulin heavy variable 3-73	+	+	-	+	+	-
274	P09172	Dopamine beta-hydroxylase	+	+	+	-	+	-
275	Q92820	Gamma-glutamyl hydrolase	+	+	+	+	+	-
276	Q13790	Apolipoprotein F	+	+	-	+	+	-
277	P07737	Profilin-1	+	+	+	-	+	-
278	P07996	Thrombospondin-1	+	+	+	-	+	-
279	P02462	Collagen alpha-1(IV) chain	+	+	+	-	+	-
280	P26038	Moesin	+	-	+	-	-	-
281	P48740	Mannan-binding lectin serine protease 1	+	+	+	+	+	-
282	P01817	Immunoglobulin heavy variable 2-5	+	+	-	+	+	-
283	A0A0B4J1U7	Immunoglobulin heavy variable 6-1	+	+	-	+	+	-
284	P33151	Cadherin-5	+	+	+	-	+	-
285	P19021	Peptidyl-glycine alpha-amidating monooxygenase	+	+	+	-	+	-
286	A0A087WSX0	Immunoglobulin lambda variable 5-45	+	+	-	-	-	-
287	P02042	Hemoglobin subunit delta	+	+	-	+	+	-
288	P00558	Phosphoglycerate kinase 1	+	+	+	-	-	-
289	A0A075B6H9	Immunoglobulin lambda variable 4-69	+	+	-	+	-	-
290	Q9UNN8	Endothelial protein C receptor	+	+	+	+	+	-
291	P49327	Fatty acid synthase	+	+	-	-	-	-
292	Q15392	Delta(24)-sterol reductase	+	+	-	-	-	-
293	P41222	Prostaglandin-H2 D-isomerase	+	+	+	-	+	-
294	Q8WUA8	Tsukushin	+	+	+	-	-	-
295	P08133	Annexin A6	+	+	+	-	-	-
296	Q6UX71	Plexin domain-containing protein 2	+	+	+	+	+	-
297	P06702	Protein S100-A9	+	+	+	+	+	+
298	A0A0B4J1U3	Immunoglobulin lambda variable 1-36	+	+	-	-	-	-
299	P78539	Sushi repeat-containing protein SRPX	+	+	+	-	+	-
300	A0A075B6Q5	Immunoglobulin heavy variable 3-64	+	+	-	-	+	-
301	P13647	Keratin, type II cytoskeletal 5	+	+	+	+	+	-
302	P49747	Cartilage oligomeric matrix protein	+	+	+	+	-	-
303	Q9H8L6	Multimerin-2	+	+	+	-	+	-
304	P13591	Neural cell adhesion molecule 1	-	+	+	-	-	-
305	P04430	Immunoglobulin kappa variable 1-16	+	+	-	+	+	-
306	P0DJI8	Serum amyloid A-1 protein	+	+	-	+	+	+
307	A0A075B6J9	Immunoglobulin lambda variable 2-18	+	+	-	+	+	-
308	P62258	14-3-3 protein epsilon	+	+	+	-	-	-
309	Q15063	Periostin	+	+	+	-	+	-
310	O14786	Neuropilin-1	+	+	+	+	-	-
311	P26439	3 beta-hydroxysteroid dehydrogenase/Delta 5-->4-isomerase type 2	-	-	+	-	-	-
312	A0A0B4J1V2	Immunoglobulin heavy variable 2-26	+	+	-	+	+	-
313	P18065	Insulin-like growth factor-binding protein 2	+	+	+	+	+	-
314	P01344	Insulin-like growth factor II	+	+	-	-	+	-
315	P23083	Immunoglobulin heavy variable 1-2	+	+	-	+	-	-
316	O94985	Calsyntenin-1	+	-	+	-	-	-
317	P61626	Lysozyme C	+	+	+	+	+	-
318	P08195	4F2 cell-surface antigen heavy chain	-	-	+	-	-	-
319	P53396	ATP-citrate synthase	+	+	+	-	-	-
320	P26641	Elongation factor 1-gamma	+	-	-	-	-	-
321	P12109	Collagen alpha-1(VI) chain	+	+	+	-	+	-
322	P11047	Laminin subunit gamma-1	+	+	+	-	+	-
323	P01705	Immunoglobulin lambda variable 2-23	+	+	-	+	-	-
324	P36871	Phosphoglucomutase-1	+	+	+	-	-	-
325	Q9NPH3	Interleukin-1 receptor accessory protein	+	+	+	+	+	-
326	P22314	Ubiquitin-like modifier-activating enzyme 1	+	+	+	-	-	-
327	Q9HDC9	Adipocyte plasma membrane-associated protein	+	-	-	+	+	-
328	P13639	Elongation factor 2	+	+	+	-	+	-
329	P01699	Immunoglobulin lambda variable 1-44	-	+	-	-	-	-
330	P50395	Rab GDP dissociation inhibitor beta	-	+	+	-	-	-
331	Q8NBP7	Proprotein convertase subtilisin/kexin type 9	-	-	+	-	-	-
332	P11021	Endoplasmic reticulum chaperone BiP	+	+	+	-	+	-
333	P01766	Immunoglobulin heavy variable 3-13	+	+	-	+	+	-
334	P08758	Annexin A5	-	-	+	-	-	-
335	Q8N474	Secreted frizzled-related protein 1	+	+	-	-	-	-
336	Q14195	Dihydropyrimidinase-related protein 3	-	-	+	-	-	-
337	P01706	Immunoglobulin lambda variable 2-11	+	+	-	+	-	-
338	P01601	Immunoglobulin kappa variable 1D-16	-	+	-	-	-	-
339	Q86Y38	Xylosyltransferase 1	+	+	+	-	-	-
340	Q01459	Di-N-acetylchitobiase	+	+	+	-	+	-
341	Q92496	Complement factor H-related protein 4	+	+	-	+	-	-
342	P19338	Nucleolin	-	-	+	-	-	-
343	Q6P179	Endoplasmic reticulum aminopeptidase 2	-	-	+	-	-	-
344	Q6EMK4	Vasorin	+	+	+	+	+	-
345	P05362	Intercellular adhesion molecule 1	+	+	+	-	+	-
346	P29401	Transketolase	-	+	+	-	-	-
347	P09529	Inhibin beta B chain	-	+	+	-	-	-
348	P78417	Glutathione S-transferase omega-1	-	+	+	-	-	-
349	P60660	Myosin light polypeptide 6	-	-	+	-	-	-
350	A0A0B4J1Y8	Immunoglobulin lambda variable 9-49	+	+	-	+	+	-
351	A0A087WSZ0	Immunoglobulin kappa variable 1D-8	+	+	-	+	+	-
352	A0A0C4DH29	Immunoglobulin heavy variable 1-3	+	+	-	+	+	-
353	A0A0A0MS14	Immunoglobulin heavy variable 1-45	+	+	-	-	+	-
354	Q15323	Keratin, type I cuticular Ha1	+	-	-	-	-	-
355	P25391	Laminin subunit alpha-1	+	+	+	-	-	-
356	Q76LX8	A disintegrin and metalloproteinase with thrombospondin motifs 13	+	+	+	-	-	-
357	Q14697	Neutral alpha-glucosidase AB	+	+	+	-	-	-
358	Q16394	Exostosin-1	+	-	+	-	-	-
359	P23528	Cofilin-1	+	+	+	-	-	-
360	Q13228	Methanethiol oxidase	-	-	+	-	-	-
361	P27797	Calreticulin	+	+	+	-	-	-
362	P05387	60S acidic ribosomal protein P2	+	+	+	-	-	-
363	P08865	40S ribosomal protein SA	+	+	+	-	-	-
364	P08294	Extracellular superoxide dismutase [Cu-Zn]	+	+	+	+	+	-
365	Q99497	Protein/nucleic acid deglycase DJ-1	-	-	+	-	-	-
366	P01814	Immunoglobulin heavy variable 2-70	+	-	-	+	-	-
367	P34096	Ribonuclease 4	+	+	+	-	-	-
368	P31949	Protein S100-A11	-	+	+	-	-	-
369	P59666	Neutrophil defensin 3	+	-	-	-	+	-
370	Q9BUN1	Protein MENT	+	+	-	+	-	-
371	P00390	Glutathione reductase, mitochondrial	+	-	-	-	+	-
372	Q99969	Retinoic acid receptor responder protein 2	+	+	+	-	+	-
373	P98066	Tumor necrosis factor-inducible gene 6 protein	+	+	+	-	+	-
374	Q5SZK8	FRAS1-related extracellular matrix protein 2	+	+	+	-	-	-
375	P14174	Macrophage migration inhibitory factor	+	+	+	-	-	-
376	P08253	72 kDa type IV collagenase	+	+	+	+	+	-
377	P07585	Decorin	+	+	+	-	-	-
378	Q9Y5Y7	Lymphatic vessel endothelial hyaluronic acid receptor 1	+	+	+	+	+	-
379	Q99878	Histone H2A type 1-J	+	+	+	+	+	-
380	P30101	Protein disulfide-isomerase A3	+	+	+	-	+	-
381	Q86U17	Serpin A11	+	+	+	-	-	-
382	P83110	Serine protease HTRA3	+	+	-	-	+	-
383	Q15485	Ficolin-2	+	+	-	-	+	-
384	P62805	Histone H4	+	+	+	+	+	+
385	P13473	Lysosome-associated membrane glycoprotein 2	+	+	+	-	+	-
386	Q02818	Nucleobindin-1	+	+	+	-	-	-
387	O95479	GDH/6PGL endoplasmic bifunctional protein	-	-	+	-	-	-
388	P15291	Beta-1,4-galactosyltransferase 1	+	+	+	-	-	-
389	Q13103	Secreted phosphoprotein 24	+	+	+	+	+	-
390	P30041	Peroxiredoxin-6	+	+	+	-	+	-
391	Q14515	SPARC-like protein 1	+	+	+	-	+	-
392	P23284	Peptidyl-prolyl cis-trans isomerase B	+	+	+	-	+	-
393	A0A0B4J1X5	Immunoglobulin heavy variable 3-74	+	+	-	+	+	-
394	P27487	Dipeptidyl peptidase 4	+	+	+	-	-	-
395	Q06830	Peroxiredoxin-1	+	+	+	-	+	-
396	P02533	Keratin, type I cytoskeletal 14	+	+	+	+	+	-
397	P54108	Cysteine-rich secretory protein 3	+	+	+	+	+	-
398	P03950	Angiogenin	+	+	+	-	-	-
399	P11413	Glucose-6-phosphate 1-dehydrogenase	-	-	+	-	-	-
400	P14324	Farnesyl pyrophosphate synthase	-	+	+	-	-	-
401	P04040	Catalase	+	+	+	-	-	-
402	P39060	Collagen alpha-1(XVIII) chain	+	+	+	+	-	-
403	Q10588	ADP-ribosyl cyclase/cyclic ADP-ribose hydrolase 2	+	+	+	-	-	-
404	P31431	Syndecan-4	+	+	+	-	-	-
405	P20851	C4b-binding protein beta chain	+	+	-	-	+	-
406	P48506	Glutamate--cysteine ligase catalytic subunit	+	+	+	-	-	-
407	P0DP25	Calmodulin-3	+	+	+	-	-	-
408	Q6YHK3	CD109 antigen	-	+	+	-	-	-
409	Q12905	Interleukin enhancer-binding factor 2	-	-	+	-	-	-
410	A0A0B4J1X8	Immunoglobulin heavy variable 3-43	+	+	-	-	+	-
411	P06331	Immunoglobulin heavy variable 4-34	+	+	-	+	+	-
412	P08637	Low affinity immunoglobulin gamma Fc region receptor III-A	+	+	+	+	-	-
413	Q12860	Contactin-1	-	-	+	-	-	-
414	A0A075B6K4	Immunoglobulin lambda variable 3-10	-	+	-	-	+	-
415	P16070	CD44 antigen	+	+	+	+	+	-
416	P18669	Phosphoglycerate mutase 1	-	-	+	-	-	-
417	P22676	Calretinin	-	-	+	-	-	-
418	P07998	Ribonuclease pancreatic	+	+	+	-	-	-
419	A0M8Q6	Immunoglobulin lambda constant 7	+	+	-	+	+	-
420	Q9HCB6	Spondin-1	+	+	+	-	+	-
421	P06744	Glucose-6-phosphate isomerase	+	+	+	-	-	-
422	P10721	Mast/stem cell growth factor receptor Kit	-	-	+	-	-	-
423	Q86UD1	Out at first protein homolog	+	+	+	-	+	-
424	P15814	Immunoglobulin lambda-like polypeptide 1	-	+	-	-	+	-
425	P07942	Laminin subunit beta-1	-	-	+	-	-	-
426	P40227	T-complex protein 1 subunit zeta	+	+	-	-	-	-
427	P17174	Aspartate aminotransferase, cytoplasmic	-	+	+	-	-	-
428	Q14103	Heterogeneous nuclear ribonucleoprotein D0	-	-	+	-	-	-
429	A0A0C4DH67	Immunoglobulin kappa variable 1-8	+	+	-	+	+	-
430	A0A0B4J2H0	Immunoglobulin heavy variable 1-69D	+	+	-	+	+	-
431	A0A0C4DH24	Immunoglobulin kappa variable 6-21	+	-	-	-	+	-
432	P69891	Hemoglobin subunit gamma-1	+	+	-	-	+	-
433	P0DJI9	Serum amyloid A-2 protein	+	+	-	-	-	-
434	P31946	14-3-3 protein beta/alpha	-	-	+	-	+	-
435	P61981	14-3-3 protein gamma	+	+	+	-	-	-
436	P46940	Ras GTPase-activating-like protein IQGAP1	-	+	-	-	-	-
437	Q92954	Proteoglycan 4	+	+	+	-	-	-
438	P18206	Vinculin	-	+	+	-	-	-
439	P23470	Receptor-type tyrosine-protein phosphatase gamma	+	+	+	-	-	-
440	O75339	Cartilage intermediate layer protein 1	-	-	+	-	-	-
441	P04275	von Willebrand factor	+	+	+	-	-	-
442	O00533	Neural cell adhesion molecule L1-like protein	+	+	+	+	-	-
443	P10809	60 kDa heat shock protein, mitochondrial	-	+	-	-	-	-
444	Q8IWY4	Signal peptide, CUB and EGF-like domain-containing protein 1	+	+	+	-	-	-
445	Q02809	Procollagen-lysine,2-oxoglutarate 5-dioxygenase 1	+	+	+	-	-	-
446	O43390	Heterogeneous nuclear ribonucleoprotein R	-	-	+	-	-	-
447	Q6UY14	ADAMTS-like protein 4	+	+	+	-	-	-
448	P05067	Amyloid-beta precursor protein	+	+	+	-	+	-
449	P54802	Alpha-N-acetylglucosaminidase	+	+	+	-	-	-
450	P01130	Low-density lipoprotein receptor	-	-	+	-	-	-
451	P19022	Cadherin-2	+	+	+	-	-	-
452	Q93063	Exostosin-2	-	-	+	-	-	-
453	P52209	6-phosphogluconate dehydrogenase, decarboxylating	+	+	+	-	-	-
454	P12277	Creatine kinase B-type	-	-	+	-	-	-
455	Q13838	Spliceosome RNA helicase DDX39B	-	-	+	-	-	-
456	P07359	Platelet glycoprotein Ib alpha chain	+	+	+	-	+	-
457	Q99536	Synaptic vesicle membrane protein VAT-1 homolog	-	-	-	-	-	+
458	P07355	Annexin A2	+	-	+	-	-	-
459	Q9BRK5	45 kDa calcium-binding protein	-	-	+	-	-	-
460	Q92743	Serine protease HTRA1	+	+	-	-	+	-
461	P10912	Growth hormone receptor	+	-	-	-	-	-
462	P00491	Purine nucleoside phosphorylase	-	+	+	-	-	-
463	O00299	Chloride intracellular channel protein 1	+	+	-	-	-	-
464	Q93070	Ecto-ADP-ribosyltransferase 4	-	-	+	-	-	-
465	P61158	Actin-related protein 3	-	+	-	-	-	-
466	O60687	Sushi repeat-containing protein SRPX2	+	+	+	-	-	-
467	P43121	Cell surface glycoprotein MUC18	+	+	+	-	+	-
468	Q9UJJ9	N-acetylglucosamine-1-phosphotransferase subunit gamma	-	+	+	-	-	-
469	P37802	Transgelin-2	-	-	+	-	-	-
470	P15514	Amphiregulin	+	+	+	-	+	-
471	P00441	Superoxide dismutase [Cu-Zn]	+	+	+	-	-	-
472	Q96FQ6	Protein S100-A16	-	+	+	-	-	-
473	P20774	Mimecan	+	+	+	-	+	+
474	P00492	Hypoxanthine-guanine phosphoribosyltransferase	-	-	+	-	-	-
475	P24592	Insulin-like growth factor-binding protein 6	+	+	+	+	-	-
476	P11279	Lysosome-associated membrane glycoprotein 1	-	-	+	-	-	-
477	P07339	Cathepsin D	-	-	+	-	-	-
478	O95084	Serine protease 23	-	-	+	-	-	-
479	P14209	CD99 antigen	-	-	+	-	+	+
480	P05019	Insulin-like growth factor I	-	-	-	-	+	-
481	P05413	Fatty acid-binding protein, heart	-	-	+	-	-	-
482	O75144	ICOS ligand	+	+	+	+	-	-
483	P52565	Rho GDP-dissociation inhibitor 1	-	+	+	-	-	-
484	P49773	Histidine triad nucleotide-binding protein 1	-	-	+	-	-	-
485	P10599	Thioredoxin	+	+	+	-	+	-
486	P10124	Serglycin	-	+	-	-	-	+
487	P02775	Platelet basic protein	+	+	+	-	+	-
488	P60985	Keratinocyte differentiation-associated protein	-	-	-	-	-	+
489	Q9NTK5	Obg-like ATPase 1	+	-	+	-	-	-
490	Q9UBQ6	Exostosin-like 2	-	-	+	-	-	-
491	Q12913	Receptor-type tyrosine-protein phosphatase eta	+	+	+	-	-	-
492	P40189	Interleukin-6 receptor subunit beta	-	-	+	-	-	-
493	P22626	Heterogeneous nuclear ribonucleoproteins A2/B1	+	+	+	-	+	+
494	Q16769	Glutaminyl-peptide cyclotransferase	+	+	+	+	-	-
495	P35555	Fibrillin-1	+	+	+	-	+	+
496	Q9UBP4	Dickkopf-related protein 3	-	+	+	-	-	-
497	P35579	Myosin-9	-	+	+	+	-	+
498	Q6UXH8	Collagen and calcium-binding EGF domain-containing protein 1	-	-	+	-	-	+
499	P05204	Non-histone chromosomal protein HMG-17	-	-	-	-	-	+
500	P05121	Plasminogen activator inhibitor 1	+	+	+	-	-	-
501	Q86UN3	Reticulon-4 receptor-like 2	-	-	+	-	-	-
502	O75015	Low affinity immunoglobulin gamma Fc region receptor III-B	+	+	+	-	-	-
503	Q9Y4L1	Hypoxia up-regulated protein 1	-	-	+	-	-	-
504	P10646	Tissue factor pathway inhibitor	+	+	+	-	-	+
505	P09651	Heterogeneous nuclear ribonucleoprotein A1	+	+	+	-	-	+
506	Q6UWH4	Golgi-associated kinase 1B	+	+	-	-	-	-
507	Q92688	Acidic leucine-rich nuclear phosphoprotein 32 family member B	-	-	+	-	-	-
508	P81605	Dermcidin	+	+	+	+	+	+
509	Q7Z7M0	Multiple epidermal growth factor-like domains protein 8	+	+	+	-	-	+
510	P04792	Heat shock protein beta-1	+	+	-	-	-	-
511	Q14126	Desmoglein-2	-	-	+	-	-	-
512	P16402	Histone H1.3	-	-	-	-	-	+
513	Q13907	Isopentenyl-diphosphate Delta-isomerase 1	-	-	+	-	-	-
514	Q12841	Follistatin-related protein 1	-	+	+	-	+	-
515	P24043	Laminin subunit alpha-2	+	+	+	-	-	-
516	P53634	Dipeptidyl peptidase 1	-	-	+	-	-	-
517	P02461	Collagen alpha-1(III) chain	+	-	+	-	-	+
518	P08670	Vimentin	-	+	+	+	-	+
519	P16035	Metalloproteinase inhibitor 2	-	-	+	-	-	-
520	P07858	Cathepsin B	-	-	+	-	-	-
521	P08123	Collagen alpha-2(I) chain	-	+	+	-	-	-
522	O75083	WD repeat-containing protein 1	-	+	-	-	-	-
523	Q03167	Transforming growth factor beta receptor type 3	+	+	+	-	-	-
524	Q7Z6Z7	E3 ubiquitin-protein ligase HUWE1	+	-	-	-	-	-
525	A0A0C4DH34	Immunoglobulin heavy variable 4-28	+	+	-	+	+	-
526	Q02878	60S ribosomal protein L6	-	-	-	-	-	+
527	P00918	Carbonic anhydrase 2	+	+	+	-	-	-
528	Q96S96	Phosphatidylethanolamine-binding protein 4	-	-	+	-	-	-
529	P11511	Aromatase	-	-	-	+	-	-
530	P61586	Transforming protein RhoA	+	+	+	-	-	-
531	Q71U36	Tubulin alpha-1A chain	-	-	-	-	-	+
532	P02788	Lactotransferrin	+	-	+	-	-	-
533	Q13740	CD166 antigen	-	-	+	-	-	-
534	P07900	Heat shock protein HSP 90-alpha	+	+	+	-	+	-
535	P54289	Voltage-dependent calcium channel subunit alpha-2/delta-1	-	-	+	-	-	-
536	P40925	Malate dehydrogenase, cytoplasmic	-	+	+	-	+	-
537	Q16706	Alpha-mannosidase 2	+	+	+	-	-	-
538	P55290	Cadherin-13	+	+	+	-	-	-
539	P35241	Radixin	+	-	+	-	-	-
540	P02452	Collagen alpha-1(I) chain	+	+	+	-	+	+
541	P12830	Cadherin-1	+	+	+	-	+	-
542	P22692	Insulin-like growth factor-binding protein 4	+	+	+	-	+	-
543	P35052	Glypican-1	+	+	+	-	-	-
544	Q01581	Hydroxymethylglutaryl-CoA synthase, cytoplasmic	-	-	+	-	-	-
545	Q16853	Membrane primary amine oxidase	+	+	+	-	-	-
546	Q15084	Protein disulfide-isomerase A6	-	+	-	-	-	-
547	P09936	Ubiquitin carboxyl-terminal hydrolase isozyme L1	+	+	+	-	-	-
548	P07333	Macrophage colony-stimulating factor 1 receptor	+	+	+	-	-	-
549	P05062	Fructose-bisphosphate aldolase B	-	-	+	-	-	-
550	Q8IXL6	Extracellular serine/threonine protein kinase FAM20C	-	-	+	-	-	-
551	P13667	Protein disulfide-isomerase A4	-	-	+	-	-	-
552	P26022	Pentraxin-related protein PTX3	+	+	+	-	-	-
553	Q16881	Thioredoxin reductase 1, cytoplasmic	-	-	+	-	-	-
554	P15531	Nucleoside diphosphate kinase A	-	-	+	-	-	-
555	Q96SM3	Probable carboxypeptidase X1	-	+	+	-	-	-
556	Q14118	Dystroglycan	-	-	+	-	-	-
557	P30086	Phosphatidylethanolamine-binding protein 1	-	-	+	-	-	-
558	Q01105	Protein SET	-	-	+	-	-	-
559	Q86VB7	Scavenger receptor cysteine-rich type 1 protein M130	-	-	+	-	-	-
560	P07910	Heterogeneous nuclear ribonucleoproteins C1/C2	-	-	+	-	+	-
561	P05997	Collagen alpha-2(V) chain	-	-	+	-	-	-
562	P48637	Glutathione synthetase	-	+	+	-	-	-
563	P30043	Flavin reductase (NADPH)	+	+	+	-	-	-
564	Q01518	Adenylyl cyclase-associated protein 1	+	+	+	-	-	-
565	P67936	Tropomyosin alpha-4 chain	-	-	+	-	-	-
566	P16930	Fumarylacetoacetase	+	-	+	-	-	-
567	Q8N6C8	Leukocyte immunoglobulin-like receptor subfamily A member 3	+	+	+	-	-	-
568	P24821	Tenascin	-	-	+	-	-	-
569	Q9BTY2	Plasma alpha-L-fucosidase	-	+	+	-	-	-
570	P0DMV9	Heat shock 70 kDa protein 1B	+	+	+	-	-	-
571	Q99784	Noelin	-	+	+	+	-	-
572	P55285	Cadherin-6	-	-	+	-	-	-
573	O43505	Beta-1,4-glucuronyltransferase 1	+	-	+	-	-	-
574	P05455	Lupus La protein	-	-	+	-	-	-
575	Q92859	Neogenin	-	+	+	-	-	-
576	O00187	Mannan-binding lectin serine protease 2	+	+	+	+	+	-
577	Q01995	Transgelin	-	-	+	-	-	-
578	P55287	Cadherin-11	-	-	+	-	-	-
579	P26572	Alpha-1,3-mannosyl-glycoprotein 2-beta-N-acetylglucosaminyltransferase	-	+	-	-	-	-
580	Q13867	Bleomycin hydrolase	-	-	+	-	-	-
581	Q8WZ75	Roundabout homolog 4	+	+	+	-	-	-
582	O75326	Semaphorin-7A	-	-	+	-	-	-
583	P09238	Stromelysin-2	-	-	+	-	-	-
584	O75347	Tubulin-specific chaperone A	-	-	+	-	-	-
585	Q13219	Pappalysin-1	+	-	+	-	-	-
586	P12821	Angiotensin-converting enzyme	-	-	+	-	-	-
587	P06748	Nucleophosmin	-	-	+	-	-	-
588	P35916	Vascular endothelial growth factor receptor 3	+	-	+	-	-	-
589	Q7Z7G0	Target of Nesh-SH3	-	-	+	-	-	-
590	P15121	Aldo-keto reductase family 1 member B1	-	-	+	-	-	-
591	Q9H4A9	Dipeptidase 2	+	+	+	-	-	-
592	Q13332	Receptor-type tyrosine-protein phosphatase S	-	-	+	-	-	-
593	Q86YZ3	Hornerin	+	+	+	+	+	-
594	P30046	D-dopachrome decarboxylase	-	+	+	-	-	-
595	O43493	Trans-Golgi network integral membrane protein 2	-	-	+	-	-	-
596	P15311	Ezrin	+	+	+	-	-	+
597	Q08830	Fibrinogen-like protein 1	-	-	+	-	-	-
598	P80303	Nucleobindin-2	-	-	+	-	-	-
599	P09382	Galectin-1	-	+	-	-	-	-
600	P49641	Alpha-mannosidase 2x	+	+	+	-	-	-
601	Q06481	Amyloid-like protein 2	-	-	+	-	-	+
602	Q9Y5C1	Angiopoietin-related protein 3	-	+	+	-	-	-
603	P12956	X-ray repair cross-complementing protein 6	-	-	+	-	-	-
604	P20061	Transcobalamin-1	-	-	+	-	-	-
605	P00568	Adenylate kinase isoenzyme 1	-	+	+	-	-	-
606	O00339	Matrilin-2	-	-	+	-	-	-
607	P17813	Endoglin	-	+	+	-	-	-
608	P06753	Tropomyosin alpha-3 chain	-	-	+	-	-	-
609	Q06323	Proteasome activator complex subunit 1	+	+	-	-	-	-
610	P05109	Protein S100-A8	+	+	+	+	-	+
611	Q9UKU6	Thyrotropin-releasing hormone-degrading ectoenzyme	-	-	+	-	-	-
612	P26639	Threonine--tRNA ligase, cytoplasmic	-	-	+	-	-	-
613	P37837	Transaldolase	-	-	+	-	-	-
614	Q8WWZ8	Oncoprotein-induced transcript 3 protein	-	+	+	-	-	-
615	Q9NPY3	Complement component C1q receptor	-	-	+	-	-	-
616	P14543	Nidogen-1	-	-	+	-	-	-
617	Q10471	Polypeptide N-acetylgalactosaminyltransferase 2	-	-	+	-	-	-
618	Q13421	Mesothelin	+	+	+	-	+	-
619	P02545	Prelamin-A/C	-	-	+	-	-	-
620	P63241	Eukaryotic translation initiation factor 5A-1	+	+	+	-	-	-
621	Q9NY97	N-acetyllactosaminide beta-1,3-N-acetylglucosaminyltransferase 2	+	-	+	-	-	-
622	P13797	Plastin-3	-	+	-	-	-	-
623	Q9NZ08	Endoplasmic reticulum aminopeptidase 1	+	-	+	-	-	-
624	P25774	Cathepsin S	-	+	+	-	-	-
625	Q9UBR2	Cathepsin Z	-	-	+	-	-	-
626	Q5D862	Filaggrin-2	+	+	+	+	-	-
627	P04066	Tissue alpha-L-fucosidase	-	-	+	-	-	-
628	Q99435	Protein kinase C-binding protein NELL2	+	+	+	-	-	-
629	P07686	Beta-hexosaminidase subunit beta	-	+	+	-	-	-
630	Q9BY67	Cell adhesion molecule 1	-	-	+	-	-	-
631	P00533	Epidermal growth factor receptor	-	+	+	-	-	-
632	Q9Y6Z7	Collectin-10	-	+	+	-	-	-
633	P09429	High mobility group protein B1	-	-	+	-	-	-
634	P11362	Fibroblast growth factor receptor 1	-	-	+	-	-	-
635	P14550	Aldo-keto reductase family 1 member A1	-	-	+	-	-	-
636	Q8IUL8	Cartilage intermediate layer protein 2	+	+	+	-	-	-
637	P80723	Brain acid soluble protein 1	-	-	+	-	+	-
638	P16152	Carbonyl reductase [NADPH] 1	-	-	+	-	-	-
639	Q13449	Limbic system-associated membrane protein	-	-	+	-	-	-
640	P40926	Malate dehydrogenase, mitochondrial	-	-	+	-	-	-
641	P62249	40S ribosomal protein S16	-	+	-	-	+	-
642	P42785	Lysosomal Pro-X carboxypeptidase	-	+	+	-	-	-
643	O75368	SH3 domain-binding glutamic acid-rich-like protein	-	-	+	-	-	-
644	P62942	Peptidyl-prolyl cis-trans isomerase FKBP1A	-	-	+	-	-	-
645	P55786	Puromycin-sensitive aminopeptidase	-	-	-	-	+	-
646	P12645	Bone morphogenetic protein 3	+	+	-	-	-	-
647	P55103	Inhibin beta C chain	+	+	+	-	-	-
648	P08833	Insulin-like growth factor-binding protein 1	-	+	-	+	-	-
649	Q9BRA2	Thioredoxin domain-containing protein 17	-	-	+	-	-	-
650	O14818	Proteasome subunit alpha type-7	-	+	+	-	-	-
651	P07711	Cathepsin L1	-	-	+	-	-	-
652	P08779	Keratin, type I cytoskeletal 16	+	+	+	+	+	-
653	P21333	Filamin-A	+	+	+	-	-	-
654	P62987	Ubiquitin-60S ribosomal protein L40	+	+	+	+	+	-
655	O75223	Gamma-glutamylcyclotransferase	-	-	+	-	-	-
656	P20908	Collagen alpha-1(V) chain	+	+	+	-	+	-
657	P23396	40S ribosomal protein S3	-	-	+	-	-	-
658	Q07955	Serine/arginine-rich splicing factor 1	-	-	+	-	-	-
659	O60243	Heparan-sulfate 6-O-sulfotransferase 1	-	-	+	-	-	-
660	Q15262	Receptor-type tyrosine-protein phosphatase kappa	-	-	+	-	-	-
661	P10586	Receptor-type tyrosine-protein phosphatase F	-	-	+	-	-	-
662	Q02487	Desmocollin-2	-	-	+	-	-	-
663	P16403	Histone H1.2	-	-	-	-	-	+
664	P27635	60S ribosomal protein L10	-	-	-	-	+	-
665	Q07075	Glutamyl aminopeptidase	-	-	+	-	-	-
666	P27348	14-3-3 protein theta	-	-	+	-	-	-
667	Q14112	Nidogen-2	+	+	+	-	-	-
668	P80188	Neutrophil gelatinase-associated lipocalin	-	-	+	-	-	-
669	Q71DI3	Histone H3.2	+	+	+	+	+	+
670	Q9NPR2	Semaphorin-4B	+	+	+	-	-	-
671	P31944	Caspase-14	-	-	+	-	-	-
672	Q9H299	SH3 domain-binding glutamic acid-rich-like protein 3	-	-	+	-	-	-
673	Q8NC51	Plasminogen activator inhibitor 1 RNA-binding protein	-	-	+	-	-	-
674	P62269	40S ribosomal protein S18	-	+	-	-	-	-
675	P39687	Acidic leucine-rich nuclear phosphoprotein 32 family member A	-	-	+	-	-	-
676	P11717	Cation-independent mannose-6-phosphate receptor	+	-	+	-	-	-
677	Q9UBX1	Cathepsin F	-	-	+	-	-	-
678	P30530	Tyrosine-protein kinase receptor UFO	-	-	+	-	-	-
679	O15394	Neural cell adhesion molecule 2	-	-	+	-	-	-
680	P09603	Macrophage colony-stimulating factor 1	-	-	-	-	-	+
681	P19961	Alpha-amylase 2B	+	+	+	+	-	-
682	P19256	Lymphocyte function-associated antigen 3	-	-	+	-	-	-
683	P52823	Stanniocalcin-1	+	+	-	-	-	-
684	Q8IWU5	Extracellular sulfatase Sulf-2	-	+	+	-	-	-
685	P13489	Ribonuclease inhibitor	-	+	-	-	-	-
686	P13693	Translationally-controlled tumor protein	-	-	+	-	-	-
687	P14314	Glucosidase 2 subunit beta	-	-	+	-	-	-
688	Q7LGC8	Carbohydrate sulfotransferase 3	-	-	+	-	-	-
689	Q96NZ9	Proline-rich acidic protein 1	-	-	+	-	-	-
690	Q92823	Neuronal cell adhesion molecule	-	+	+	-	-	-
691	Q9H0U4	Ras-related protein Rab-1B	-	-	-	+	-	-
692	P07307	Asialoglycoprotein receptor 2	-	-	+	-	-	-
693	Q99584	Protein S100-A13	+	-	+	-	+	-
694	Q15166	Serum paraoxonase/lactonase 3	+	+	-	+	+	-
695	P29508	Serpin B3	-	-	+	-	-	-
696	P34932	Heat shock 70 kDa protein 4	-	-	+	-	-	-
697	P05060	Secretogranin-1	+	+	+	-	-	-
698	Q8IZF2	Adhesion G protein-coupled receptor F5	-	-	+	-	-	-
699	Q9UNZ2	NSFL1 cofactor p47	-	-	+	-	-	-
700	Q96G03	Phosphoglucomutase-2	-	-	+	-	-	-
701	Q13451	Peptidyl-prolyl cis-trans isomerase FKBP5	-	-	+	-	-	-
702	P10645	Chromogranin-A	+	+	+	-	-	-
703	O00592	Podocalyxin	+	-	+	-	-	+
704	Q92563	Testican-2	+	+	+	-	-	-
705	P31151	Protein S100-A7	-	-	+	+	+	-
706	P61916	NPC intracellular cholesterol transporter 2	-	-	+	-	-	-
707	P55056	Apolipoprotein C-IV	+	+	-	+	+	-
708	Q06828	Fibromodulin	-	-	+	-	-	-
709	P18827	Syndecan-1	+	+	+	-	-	-
710	Q86SQ4	Adhesion G-protein coupled receptor G6	-	-	+	-	-	-
711	O14960	Leukocyte cell-derived chemotaxin-2	-	-	+	-	-	-
712	Q12866	Tyrosine-protein kinase Mer	-	-	+	-	-	-
713	Q8IUX7	Adipocyte enhancer-binding protein 1	-	+	+	-	-	-
714	P51991	Heterogeneous nuclear ribonucleoprotein A3	-	-	+	-	-	-
715	O15217	Glutathione S-transferase A4	-	-	+	-	-	-
716	Q15185	Prostaglandin E synthase 3	-	-	+	-	-	-
717	P25786	Proteasome subunit alpha type-1	+	-	+	-	-	-
718	P24534	Elongation factor 1-beta	-	-	+	-	-	-
719	Q8IWV2	Contactin-4	-	-	+	-	-	-
720	P28066	Proteasome subunit alpha type-5	-	-	+	-	-	-
721	Q9ULI3	Protein HEG homolog 1	-	+	+	-	-	-
722	P51858	Hepatoma-derived growth factor	-	-	+	-	-	-
723	Q68BL8	Olfactomedin-like protein 2B	+	+	+	-	-	-
724	P08581	Hepatocyte growth factor receptor	-	-	+	-	-	-
725	P68036	Ubiquitin-conjugating enzyme E2 L3	-	-	+	-	-	-
726	O43396	Thioredoxin-like protein 1	-	-	+	-	-	-
727	P21810	Biglycan	-	-	+	-	-	-
728	O14498	Immunoglobulin superfamily containing leucine-rich repeat protein	+	+	+	-	-	-
729	Q9P232	Contactin-3	-	-	+	-	-	-
730	O94769	Extracellular matrix protein 2	-	-	+	-	-	-
731	P28827	Receptor-type tyrosine-protein phosphatase mu	-	-	+	-	-	-
732	P60842	Eukaryotic initiation factor 4A-I	+	+	+	-	+	-
733	Q08554	Desmocollin-1	+	-	+	-	-	-
734	P16401	Histone H1.5	-	-	-	-	-	+
735	P05164	Myeloperoxidase	-	+	+	-	-	-
736	Q9BWP8	Collectin-11	+	+	+	-	-	-
737	Q99715	Collagen alpha-1(XII) chain	-	-	+	-	-	-
738	Q9Y279	V-set and immunoglobulin domain-containing protein 4	-	-	+	-	-	-
739	Q9HC38	Glyoxalase domain-containing protein 4	-	-	+	-	-	-
740	Q7Z3B1	Neuronal growth regulator 1	-	-	+	-	-	-
741	P83731	60S ribosomal protein L24	-	-	-	-	-	+
742	P06703	Protein S100-A6	+	+	+	-	+	-
743	Q14563	Semaphorin-3A	-	-	+	-	-	-
744	P15880	40S ribosomal protein S2	-	-	-	-	-	+
745	P07911	Uromodulin	-	-	+	+	-	-
746	O43707	Alpha-actinin-4	-	-	+	-	-	-
747	Q16531	DNA damage-binding protein 1	-	-	+	-	-	-
748	P01825	Immunoglobulin heavy variable 4-59	+	+	-	+	-	-
749	A0A0G2JS06	Immunoglobulin lambda variable 5-39	+	+	-	-	-	-
750	Q9P0G3	Kallikrein-14	+	-	+	-	-	-
751	A0A075B6S6	Immunoglobulin kappa variable 2D-30	+	+	-	+	+	-
752	Q7Z794	Keratin, type II cytoskeletal 1b	+	-	+	-	-	-
753	A0A0J9YXX1	Immunoglobulin heavy variable 5-10-1	+	+	-	+	-	-
754	Q8WWA0	Intelectin-1	+	+	-	+	-	-
755	A0A087WSY4	Immunoglobulin heavy variable 4-30-2	+	+	-	+	+	-
756	P21741	Midkine	+	+	-	+	-	-
757	Q6UWP8	Suprabasin	+	+	+	+	+	-
758	P02538	Keratin, type II cytoskeletal 6A	+	+	+	+	-	+
759	P67809	Nuclease-sensitive element-binding protein 1	+	-	-	-	+	-
760	Q14623	Indian hedgehog protein	+	+	-	+	-	-
761	Q02985	Complement factor H-related protein 3	+	+	-	-	-	-
762	P14866	Heterogeneous nuclear ribonucleoprotein L	+	+	+	-	+	-
763	P07099	Epoxide hydrolase 1	+	+	-	-	-	-
764	P12273	Prolactin-inducible protein	+	-	+	+	-	-
765	Q12907	Vesicular integral-membrane protein VIP36	+	+	-	-	-	-
766	Q9Y240	C-type lectin domain family 11 member A	-	+	-	-	-	-
767	P06454	Prothymosin alpha	+	-	+	-	-	-
768	P15924	Desmoplakin	+	+	+	+	-	-
769	P01833	Polymeric immunoglobulin receptor	+	-	+	+	-	-
770	A0A0C4DH43	Immunoglobulin heavy variable 2-70D	+	+	-	-	+	-
771	A0A075B6K2	Immunoglobulin lambda variable 3-12	+	+	-	+	-	-
772	P60866	40S ribosomal protein S20	+	+	-	-	-	-
773	P26992	Ciliary neurotrophic factor receptor subunit alpha	+	+	+	-	-	-
774	Q96FE7	Phosphoinositide-3-kinase-interacting protein 1	+	+	-	-	-	-
775	P23490	Loricrin	+	+	+	-	-	-
776	O14792	Heparan sulfate glucosamine 3-O-sulfotransferase 1	-	-	+	-	-	-
777	A0A075B6I4	Immunoglobulin lambda variable 10-54	+	+	-	-	+	-
778	Q9Y6R7	IgGFc-binding protein	+	+	+	-	-	-
779	P01715	Immunoglobulin lambda variable 3-1	+	+	-	+	+	-
780	Q99877	Histone H2B type 1-N	-	-	-	-	-	+
781	A0A075B6J1	Immunoglobulin lambda variable 5-37	-	+	-	-	-	-
782	Q9Y6C2	EMILIN-1	+	+	+	-	-	-
783	Q4LDE5	Sushi, von Willebrand factor type A, EGF and pentraxin domain-containing protein 1	-	-	-	-	-	+
784	P51148	Ras-related protein Rab-5C	-	+	-	-	-	-
785	P30038	Delta-1-pyrroline-5-carboxylate dehydrogenase, mitochondrial	+	+	+	-	-	-
786	Q07954	Prolow-density lipoprotein receptor-related protein 1	-	-	+	-	-	-
787	P10321	HLA class I histocompatibility antigen, C alpha chain	+	+	-	-	+	-
788	P09619	Platelet-derived growth factor receptor beta	-	-	+	-	-	-
789	Q8NBJ4	Golgi membrane protein 1	-	+	+	-	-	-
790	P30740	Leukocyte elastase inhibitor	-	-	+	-	-	-
791	P14923	Junction plakoglobin	+	-	+	-	-	-
792	Q02413	Desmoglein-1	-	+	+	+	-	-
793	O00468	Agrin	-	-	+	-	-	-
794	P15104	Glutamine synthetase	-	-	+	-	-	-
795	P23471	Receptor-type tyrosine-protein phosphatase zeta	-	-	+	+	-	-
796	O15031	Plexin-B2	-	-	+	-	-	-
797	Q86WI1	Fibrocystin-L	-	-	+	+	+	-
798	Q13201	Multimerin-1	-	-	+	-	-	-
799	Q13308	Inactive tyrosine-protein kinase 7	-	-	+	-	-	-
800	Q92484	Acid sphingomyelinase-like phosphodiesterase 3a	-	-	+	-	-	-
801	Q14766	Latent-transforming growth factor beta-binding protein 1	-	-	+	-	-	-
802	Q14767	Latent-transforming growth factor beta-binding protein 2	-	-	+	-	-	+
803	O00264	Membrane-associated progesterone receptor component 1	-	-	+	-	-	-
804	P09972	Fructose-bisphosphate aldolase C	-	-	+	-	-	-
805	P04083	Annexin A1	-	-	+	-	-	-
806	Q7Z5L0	Vitelline membrane outer layer protein 1 homolog	-	-	+	-	-	-
807	P29966	Myristoylated alanine-rich C-kinase substrate	-	-	+	-	-	-
808	Q9ULV4	Coronin-1C	-	-	+	-	-	-
809	P20023	Complement receptor type 2	-	-	+	-	-	-
810	Q01469	Fatty acid-binding protein 5	+	+	+	+	-	-
811	P54764	Ephrin type-A receptor 4	-	-	+	-	-	-
812	P20930	Filaggrin	-	-	+	+	+	-
813	Q71UI9	Histone H2A.V	+	+	+	+	+	-
814	O14745	Na(+)/H(+) exchange regulatory cofactor NHE-RF1	-	-	-	-	-	+
815	Q99880	Histone H2B type 1-L	+	+	-	-	+	-
816	P07108	Acyl-CoA-binding protein	-	+	+	-	+	-
817	P10412	Histone H1.4	-	-	-	-	-	+
818	P08493	Matrix Gla protein	-	-	-	-	-	+
819	A0A1B0GTC6	Uncharacterized protein C3orf85	-	-	-	-	-	+
820	O95810	Caveolae-associated protein 2	-	-	-	-	-	+
821	Q12929	Epidermal growth factor receptor kinase substrate 8	-	-	-	-	-	+
822	P63313	Thymosin beta-10	-	-	-	-	+	+
823	Q86V81	THO complex subunit 4	-	-	-	-	-	+
824	P05114	Non-histone chromosomal protein HMG-14	-	-	-	-	-	+
825	P62328	Thymosin beta-4	-	-	-	-	+	+
826	P01040	Cystatin-A	+	+	+	+	-	-
827	P26373	60S ribosomal protein L13	-	-	-	-	-	+
828	P62241	40S ribosomal protein S8	-	-	-	-	-	+
829	Q93079	Histone H2B type 1-H	-	-	-	-	-	+
830	P68133	Actin alpha skeletal muscle	+	+	+	-	+	-
831	A0A0B4J1Z2	Immunoglobulin kappa variable 1D-43	+	+	-	+	-	-
832	Q58FF8	Putative heat shock protein HSP 90-beta 2	+	-	-	-	-	-
833	P58876	Histone H2B type 1-D	-	-	-	-	-	+
834	Q16777	Histone H2A type 2-C	+	+	+	+	+	-
835	P02776	Platelet factor 4	+	+	-	-	+	-
836	A0A0C4DH39	Immunoglobulin heavy variable 1-58	-	+	-	-	-	-
837	Q5TFQ8	Signal-regulatory protein beta-1 isoform 3	-	-	+	-	-	-
838	P17693	HLA class I histocompatibility antigen alpha chain G	-	-	-	-	-	+
839	A0A0A0MRZ7	Immunoglobulin kappa variable 2D-26	-	+	-	-	-	-
840	P05787	Keratin type II cytoskeletal 8	-	-	-	-	-	+
841	Q8WUT4	Leucine-rich repeat neuronal protein 4	-	-	+	-	-	-
842	P14384	Carboxypeptidase M	-	+	+	-	-	-
843	Q16778	Histone H2B type 2-E	-	-	-	-	-	+
844	P18124	60S ribosomal protein L7	-	-	-	-	-	+
845	P62861	40S ribosomal protein S30	-	-	-	-	-	+
846	Q9UBG3	Cornulin	-	-	-	-	-	+
847	O60282	Kinesin heavy chain isoform 5C	-	-	-	-	+	-
848	Q15155	Nodal modulator 1	-	-	+	-	-	-
849	P31997	Carcinoembryonic antigen-related cell adhesion molecule 8	-	-	+	-	-	-
850	P17066	Heat shock 70 kDa protein 6	-	-	+	-	+	-
851	Q9HBR0	Putative sodium-coupled neutral amino acid transporter 10	-	-	+	-	-	-
852	P10163	Basic salivary proline-rich protein 4	+	-	-	+	-	-
853	Q6PL18	ATPase family AAA domain-containing protein 2	-	+	-	-	-	-
854	Q9NP78	ATP-binding cassette sub-family B member 9	+	+	-	-	-	-
855	Q03181	Peroxisome proliferator-activated receptor delta	+	-	+	+	-	-
856	P48552	Nuclear receptor-interacting protein 1	+	-	-	+	-	-
857	Q8TDL5	BPI fold-containing family B member 1	+	+	-	-	-	-
858	Q8NFU7	Methylcytosine dioxygenase TET1	+	+	+	+	-	-
859	Q16627	C-C motif chemokine 14	-	-	+	-	-	-
860	Q3V6T2	Girdin	+	-	-	-	-	-
861	P28799	Progranulin	-	-	+	-	-	-
862	Q6ICB0	Desumoylating isopeptidase 1	+	+	-	-	-	-
863	P10451	Osteopontin	-	-	+	-	-	-
864	Q13439	Golgin subfamily A member 4	+	+	-	+	-	-
865	P46777	60S ribosomal protein L5	-	+	+	-	-	-
866	O00461	Golgi integral membrane protein 4	-	-	+	-	-	-
867	P27824	Calnexin	+	-	-	-	-	-
868	P46093	G-protein coupled receptor 4	+	+	+	-	-	-
869	Q8IX95	Putative cTAGE family member 3	+	+	-	+	-	-
870	Q5JPH6	Probable glutamate--tRNA ligase, mitochondrial	+	+	-	-	-	-
871	Q8N441	Fibroblast growth factor receptor-like 1	-	-	+	-	-	-
872	P27930	Interleukin-1 receptor type 2	-	-	+	-	-	-
873	Q96PF1	Protein-glutamine gamma-glutamyltransferase Z	-	+	-	-	-	-
874	Q9BVC6	Transmembrane protein 109	+	+	-	+	-	-
875	P04156	Major prion protein	-	-	+	-	-	-
876	A5D6W6	Fat storage-inducing transmembrane protein 1	+	+	-	-	-	-
877	P23588	Eukaryotic translation initiation factor 4B	-	-	+	-	-	-
878	Q13275	Semaphorin-3F	+	+	-	-	+	-
879	P46939	Utrophin	-	+	-	-	-	-
880	Q99972	Myocilin	-	-	+	-	-	-
881	P09493	Tropomyosin alpha-1 chain	-	+	-	+	-	-
882	Q96RW7	Hemicentin-1	-	-	-	-	+	-
883	P19086	Guanine nucleotide-binding protein G(z) subunit alpha	+	+	+	-	-	-
884	P04062	Lysosomal acid glucosylceramidase	-	+	+	-	-	-
885	P14868	Aspartate--tRNA ligase, cytoplasmic	+	-	-	-	-	-
886	Q1MX18	Protein inscuteable homolog	+	+	-	-	-	-
887	Q96DA6	Mitochondrial import inner membrane translocase subunit TIM14	+	+	+	-	-	-
888	Q8N9R8	Protein SCAI	+	+	-	+	-	-
889	Q9UBG0	C-type mannose receptor 2	-	-	+	-	-	-
890	Q04917	14-3-3 protein eta	-	-	+	-	-	-
891	Q7Z2Z1	Treslin	-	-	-	+	-	-
892	Q86W28	NACHT, LRR and PYD domains-containing protein 8	-	-	+	-	-	-
893	Q8IX30	Signal peptide, CUB and EGF-like domain-containing protein 3	-	-	+	+	+	-
894	P98172	Ephrin-B1	-	-	+	-	-	-
895	Q9Y6N7	Roundabout homolog 1	-	-	+	-	-	-
896	Q15223	Nectin-1	-	-	+	-	-	-
897	P27105	Erythrocyte band 7 integral membrane protein	-	+	-	-	-	-
898	A6NMB1	Sialic acid-binding Ig-like lectin 16	+	+	-	-	-	-
899	Q9Y3D6	Mitochondrial fission 1 protein	-	+	-	-	-	-
900	O95236	Apolipoprotein L3	+	+	-	-	-	-
901	Q9NRX4	14 kDa phosphohistidine phosphatase	-	+	-	-	-	-
902	P02810	Salivary acidic proline-rich phosphoprotein 1/2	-	-	+	+	-	-
903	Q58FF6	Putative heat shock protein HSP 90-beta 4	+	+	+	-	-	-
904	P47756	F-actin-capping protein subunit beta	-	+	-	-	-	-
905	P12883	Myosin-7	+	-	-	-	-	-
906	Q9HBB8	Cadherin-related family member 5	-	-	+	-	-	-
907	Q96K17	Transcription factor BTF3 homolog 4	-	-	-	-	-	+
908	Q7Z3Z2	Protein RD3	-	-	-	-	-	+
909	Q96T60	Bifunctional polynucleotide phosphatase/kinase	-	-	-	-	-	+
910	A8MYJ7	Tetratricopeptide repeat protein 34	-	-	-	-	-	+
911	Q8TD84	Down syndrome cell adhesion molecule-like protein 1	-	-	-	-	-	+
912	Q9UKZ1	CCR4-NOT transcription complex subunit 11	-	-	-	-	-	+
913	Q86VR2	Reticulophagy regulator 3	-	-	-	-	-	+
914	Q5T0Z8	Uncharacterized protein C6orf132	-	-	-	-	-	+
915	P10515	Dihydrolipoyllysine-residue acetyltransferase component of pyruvate dehydrogenase complex, mitochondrial	-	-	-	-	-	+
916	Q8N9W4	Golgin subfamily A member 6-like protein 2	-	-	-	-	-	+
917	Q5T4S7	E3 ubiquitin-protein ligase UBR4	-	-	-	-	-	+
918	P46059	Solute carrier family 15 member 1	-	-	-	-	-	+
919	O43313	ATM interactor	-	-	-	-	-	+
920	Q07020	60S ribosomal protein L18	-	-	-	-	-	+
921	Q86YV0	RAS protein activator like-3	-	-	-	-	-	+
922	O43491	Band 4.1-like protein 2	-	-	-	-	-	+
923	P62753	40S ribosomal protein S6	-	-	-	-	-	+
924	A1L4H1	Soluble scavenger receptor cysteine-rich domain-containing protein SSC5D	-	-	-	-	-	+
925	B2RXH4	BTB/POZ domain-containing protein 18	-	-	-	-	-	+
926	P41229	Lysine-specific demethylase 5C	-	-	-	-	-	+
927	Q9NYP7	Elongation of very long chain fatty acids protein 5	-	-	-	-	-	+
928	O15027	Protein transport protein Sec16A	-	-	-	-	-	+
929	P50914	60S ribosomal protein L14	-	-	-	-	-	+
930	P62277	40S ribosomal protein S13	-	-	-	-	-	+
931	P62847	40S ribosomal protein S24	-	-	-	-	-	+
932	Q99550	M-phase phosphoprotein 9	-	-	-	-	-	+
933	P51826	AF4/FMR2 family member 3	-	-	-	-	-	+
934	Q15046	Lysine--tRNA ligase	-	-	-	-	-	+
935	P62899	60S ribosomal protein L31	-	-	-	-	-	+
936	Q76M96	Coiled-coil domain-containing protein 80	-	-	-	-	-	+
937	P47929	Galectin-7	-	-	-	-	-	+
938	Q86U42	Polyadenylate-binding protein 2	-	-	-	-	-	+
939	P62280	40S ribosomal protein S11	-	-	-	-	-	+
940	Q15651	High mobility group nucleosome-binding domain-containing protein 3	-	-	-	-	-	+
941	Q96S97	Myeloid-associated differentiation marker	-	-	-	-	-	+
942	P62917	60S ribosomal protein L8	-	-	-	-	-	+

## Sheet: Table S3
Table S3. The results of quantitative analysis of unfractionated pool samples by the Quad-Orbitrap workflow along with TPA absolute concentration and coefficient of variation calculation.
Uniprot ID	Protein name	Intensity HFF1	Intensity HFF2	Intensity HFF3	TP HFF1	TP HFF2	TP HFF3	Concentration [pmol/mg] HFF1	Concentration [pmol/mg] HFF2	Concentration [pmol/mg] HFF3	Average	SD	CV
Q02985	Complement factor H-related protein 3	48659000	49535000	61130000	2.74142e-06	2.92534e-06	3.3818e-06	0.0734354	0.0783522	0.0905707	0.0807861	0.00882315	10.9216
O60423	Phospholipid-transporting ATPase IK	1321500000	696670000	1272400000	7.44524e-05	4.11426e-05	7.03909e-05	0.507233	0.280262	0.479463	0.42232	0.123806	29.3158
P07741	Adenine phosphoribosyltransferase	261170000	165640000	170260000	1.47141e-05	9.78204e-06	9.41902e-06	0.750254	0.498709	0.480164	0.576376	0.150869	26.1754
Q9P2D8	Protein unc-79 homolog	1660700000	1235100000	861150000	9.35628e-05	7.29401e-05	4.764e-05	0.31675	0.246902	0.161249	0.241634	0.0778846	32.2325
Q13009	T-lymphoma invasion and metastasis-inducing protein 1	62007000	930450000	319000000	3.49343e-06	5.49487e-05	1.76475e-05	0.019676	0.309447	0.0993751	0.142833	0.149694	104.804
Q7Z4Q2	HEAT repeat-containing protein 3	770660000	717030000	971500000	4.34185e-05	4.2345e-05	5.37447e-05	0.582033	0.567569	0.720309	0.623304	0.0843197	13.5279
P15291	Beta-1,4-galactosyltransferase 1	75834000	57326000	59971000	4.27244e-06	3.38545e-06	3.31768e-06	0.0972568	0.0770557	0.0755073	0.0832733	0.0121348	14.5723
P07108	Acyl-CoA-binding protein	202270000	199090000	265960000	1.13958e-05	1.17575e-05	1.47133e-05	1.13434	1.17019	1.46426	1.25627	0.181021	14.4095
Q66K66	Transmembrane protein 198	5349100000	2274900000	15930000000	0.000301365	0.000134347	0.00088127	7.63287	3.40225	22.3159	11.117	9.92653	89.2913
P05121	Plasminogen activator inhibitor 1	62580000	40665000	78192000	3.52572e-06	2.40151e-06	4.32569e-06	0.0782299	0.0532788	0.0959601	0.0758229	0.0214422	28.2793
Q8N5Z0	Kynurenine/alpha-aminoadipate aminotransferase, mitochondrial	0	20433000	24402000	0	1.20669e-06	1.34995e-06	0	0.0254753	0.0284975	0.0179909	0.0156537	87.0089
P23490	Loricrin	1173400000	261870000	415960000	6.61086e-05	1.5465e-05	2.30115e-05	2.56578	0.600144	0.892926	1.35295	1.06049	78.3837
P09228	Cystatin-SA	46385000	31813000	15992000	2.6133e-06	1.87875e-06	8.84699e-07	0.158877	0.114205	0.0537748	0.108953	0.0527478	48.4136
O75874	Isocitrate dehydrogenase [NADP] cytoplasmic	88656000	16676000	50148000	4.99482e-06	9.84819e-07	2.77426e-06	0.107026	0.0210995	0.0594331	0.0625197	0.0430466	68.8528
A0A0B4J1U3	Immunoglobulin lambda variable 1-36	324490000	708910000	493110000	1.82816e-05	4.18654e-05	2.72795e-05	1.46479	3.35399	2.18529	2.33469	0.95342	40.8371
P01814	Immunoglobulin heavy variable 2-70	82266000	48046000	81418000	4.63481e-06	2.83741e-06	4.50416e-06	0.349458	0.213909	0.339537	0.300968	0.0755583	25.1051
P05387	60S acidic ribosomal protein P2	165780000	181670000	140150000	9.33994e-06	1.07287e-05	7.75329e-06	0.800509	0.91942	0.664383	0.79477	0.127615	16.0569
Q9BUN1	Protein MENT	74560000	76019000	96827000	4.20066e-06	4.48938e-06	5.3566e-06	0.11422	0.122055	0.145621	0.127299	0.0163441	12.8392
Q16853	Membrane primary amine oxidase	108930000	120150000	171930000	6.13705e-06	7.09558e-06	9.5114e-06	0.0725083	0.0838226	0.112353	0.0895612	0.0205327	22.9259
P01825	Immunoglobulin heavy variable 4-59	2608000000	3511300000	3874500000	0.000146933	0.000207363	0.000214343	11.356	16.0245	16.5625	14.6477	2.86331	19.5479
Q8IUL8	Cartilage intermediate layer protein 2	37957000	26299000	46906000	2.13847e-06	1.55311e-06	2.5949e-06	0.0169294	0.0122938	0.0205385	0.0165872	0.00413301	24.9168
P26038	Moesin	88916000	31860000	36586000	5.00947e-06	1.88153e-06	2.02399e-06	0.0738494	0.0277338	0.0298314	0.0438049	0.0260405	59.4465
Q13103	Secreted phosphoprotein 24	421960000	202280000	274240000	2.3773e-05	1.19459e-05	1.51713e-05	0.976614	0.490683	0.623123	0.696807	0.251205	36.0509
P15514	Amphiregulin	391910000	474680000	395790000	2.208e-05	2.80327e-05	2.18956e-05	0.791368	1.00459	0.7846	0.860187	0.125105	14.5439
P49327	Fatty acid synthase	48093000	64346000	48788000	2.70953e-06	3.80002e-06	2.69902e-06	0.00990764	0.0138933	0.00986717	0.0112227	0.00231292	20.6093
Q8WZ75	Roundabout homolog 4	23287000	94666000	27882000	1.31197e-06	5.5906e-06	1.54247e-06	0.0122063	0.0520071	0.0143479	0.0261871	0.0223864	85.4864
P50395	Rab GDP dissociation inhibitor beta	67189000	9378900	9816400	3.78538e-06	5.53881e-07	5.43057e-07	0.0747009	0.0109289	0.0107145	0.0321148	0.0368808	114.841
P04792	Heat shock protein beta-1	64348000	45928000	52774000	3.62532e-06	2.71233e-06	2.91953e-06	0.159097	0.119015	0.128097	0.135403	0.0210161	15.5212
Q8IUX7	Adipocyte enhancer-binding protein 1	32780000	147460000	306990000	1.8468e-06	8.7084e-06	1.69831e-05	0.0141022	0.0664891	0.129657	0.0700827	0.057861	82.561
Q7Z7M0	Multiple epidermal growth factor-like domains protein 8	56917000	0	19917000	3.20667e-06	0	1.10184e-06	0.0105773	0	0.00363369	0.004737	0.00537427	113.453
P35052	Glypican-1	19682000	19261000	27547000	1.10887e-06	1.13748e-06	1.52394e-06	0.0179739	0.0184353	0.0246968	0.0203687	0.00375533	18.4368
Q6UWP8	Suprabasin	34341000	7645500	20484000	1.93475e-06	4.51513e-07	1.1332e-06	0.0319513	0.00745554	0.0187104	0.0193724	0.0122613	63.2926
P14866	Heterogeneous nuclear ribonucleoprotein L	35445000	13931000	27779000	1.99695e-06	8.2271e-07	1.53677e-06	0.0311314	0.012824	0.0239525	0.022636	0.00922445	40.7513
P63104	14-3-3 protein zeta/delta	67810000	148190000	62859000	3.82037e-06	8.75152e-06	3.47745e-06	0.137666	0.315319	0.125283	0.192756	0.106323	55.1593
Q01469	Fatty acid-binding protein 5	0	40493000	28755000	0	2.39136e-06	1.59077e-06	0	0.157646	0.10486	0.0875018	0.0802434	91.7049
P07237	Protein disulfide-isomerase	0	28459000	46561000	0	1.68068e-06	2.57582e-06	0	0.0294156	0.045079	0.0248315	0.0228864	92.1669
P31431	Syndecan-4	133300000	87805000	100970000	7.51004e-06	5.18542e-06	5.5858e-06	0.346954	0.239529	0.258003	0.281495	0.0574364	20.404
A0A087WSX0	Immunoglobulin lambda variable 5-45	66091000	196160000	229350000	3.72352e-06	1.15844e-05	1.2688e-05	0.282839	0.879841	0.963578	0.708752	0.371221	52.3766
P10124	Serglycin	44562000	56456000	56246000	2.51059e-06	3.33407e-06	3.11161e-06	0.142197	0.188813	0.176201	0.16907	0.0241123	14.2617
P21741	Midkine	138870000	162830000	165940000	7.82385e-06	9.6161e-06	9.18003e-06	0.501903	0.616798	0.588782	0.569161	0.0599076	10.5256
P0DMV9	Heat shock 70 kDa protein 1B	30272000	54443000	52861000	1.7055e-06	3.21519e-06	2.92434e-06	0.0243414	0.0458821	0.0417283	0.0373173	0.0114278	30.6232
A0A075B6S6	Immunoglobulin kappa variable 2D-30	67031000	226870000	50980000	3.77648e-06	1.3398e-05	2.82028e-06	0.285711	1.0135	0.213325	0.50418	0.44257	87.7801
P01705	Immunoglobulin lambda variable 2-23	3904500000	3249300000	4390700000	0.000219977	0.000191891	0.0002429	18.4924	16.1292	20.4151	18.3456	2.14671	11.7015
P01766	Immunoglobulin heavy variable 3-13	882300000	914510000	975830000	4.97082e-05	5.40073e-05	5.39843e-05	3.9739	4.31703	4.31485	4.20193	0.197484	4.69984
P01780	Immunoglobulin heavy variable 3-7	14030000000	11368000000	11975000000	0.000790441	0.000671349	0.000662473	61.0578	51.8519	51.1623	54.6907	5.52487	10.102
Q12907	Vesicular integral-membrane protein VIP36	119990000	35741000	54913000	6.76016e-06	2.11072e-06	3.03786e-06	0.16801	0.052451	0.0754843	0.0986484	0.0611629	62.0009
P05067	Amyloid-beta precursor protein	147290000	115750000	145110000	8.29822e-06	6.83574e-06	8.02769e-06	0.095425	0.0785972	0.0922949	0.0887723	0.00894987	10.0818
A0A0C4DH29	Immunoglobulin heavy variable 1-3	315920000	500770000	492350000	1.77987e-05	2.95735e-05	2.72375e-05	1.368	2.27271	2.09302	1.91124	0.478965	25.0604
P02538	Keratin, type II cytoskeletal 6A	457270000	338820000	481560000	2.57623e-05	2.00094e-05	2.66406e-05	0.428965	0.333131	0.443497	0.401864	0.0599667	14.9221
A0A075B6J1	Immunoglobulin lambda variable 5-37	220680000	400060000	422310000	1.2433e-05	2.3626e-05	2.33628e-05	0.936228	1.77886	1.7589	1.49133	0.480834	32.242
A0A0A0MT36	Immunoglobulin kappa variable 6D-21	405080000	430830000	534420000	2.28219e-05	2.54431e-05	2.95649e-05	1.84903	2.06113	2.39485	2.10167	0.275156	13.0922
A0A0C4DH31	Immunoglobulin heavy variable 1-18	1057500000	451600000	558680000	5.95789e-05	2.66697e-05	3.09069e-05	4.64634	2.07961	2.40982	3.04526	1.39637	45.8541
P68133	Actin, alpha skeletal muscle	347370000	483110000	339040000	1.95706e-05	2.85306e-05	1.87562e-05	0.465302	0.678243	0.445846	0.529797	0.128926	24.3349
P01742	Immunoglobulin heavy variable 1-69	5180000000	6790200000	4971900000	0.000291838	0.000401002	0.000275052	23.0488	31.6664	21.7187	25.478	5.40045	21.1966
Q71UI9	Histone H2A.V	877620000	774000000	657380000	4.94445e-05	4.57094e-05	3.63672e-05	3.65933	3.38246	2.69093	3.24424	0.498776	15.3742
P06310	Immunoglobulin kappa variable 2-30	7166900000	12396000000	11111000000	0.000403778	0.000732059	0.000614676	30.6175	55.5031	46.5997	44.2401	12.6095	28.5023
P0DP08	Immunoglobulin heavy variable 4-38-2	191540000	317630000	287220000	1.07912e-05	1.8758e-05	1.58894e-05	0.828897	1.44065	1.22025	1.16327	0.309833	26.6348
Q03591	Complement factor H-related protein 1	4342700000	4588300000	3547000000	0.000244665	0.000270967	0.000196225	6.49701	7.19453	5.20962	6.30039	1.00696	15.9824
Q9NR99	Matrix-remodeling-associated protein 5	462970000	550080000	501890000	2.60834e-05	3.24855e-05	2.77652e-05	0.0835426	0.104035	0.0889109	0.0921627	0.010626	11.5296
P35579	Myosin-9	40797000	24879000	44974000	2.29848e-06	1.46926e-06	2.48802e-06	0.0101443	0.0064837	0.0109786	0.00920218	0.00239095	25.9824
Q99880	Histone H2B type 1-L	62142000	92625000	208280000	3.50104e-06	5.47007e-06	1.15223e-05	0.250881	0.391929	0.825507	0.489439	0.299466	61.1856
P02788	Lactotransferrin	15723000	0	9564300	8.85824e-07	0	5.2911e-07	0.011328	0	0.00676491	0.00603096	0.00569955	94.5047
Q6NXT2	Histone H3.3C	227060000	207940000	106820000	1.27924e-05	1.22801e-05	5.90943e-06	0.840651	0.806882	0.388257	0.678597	0.252008	37.1366
Q8WUA8	Tsukushin	54949000	32414000	63233000	3.09579e-06	1.91424e-06	3.49814e-06	0.0818665	0.0506146	0.0924872	0.0749894	0.0217669	29.0266
P07602	Prosaposin	215230000	173350000	214860000	1.21259e-05	1.02374e-05	1.18864e-05	0.20862	0.176106	0.204456	0.196394	0.0176929	9.00889
P27487	Dipeptidyl peptidase 4	16539000	0	46987000	9.31796e-07	0	2.59939e-06	0.010553	0	0.029433	0.0133287	0.0149115	111.876
Q15392	Delta(24)-sterol reductase	116130000	49636000	56563000	6.54269e-06	2.93131e-06	3.12914e-06	0.108838	0.0487563	0.0520428	0.0698791	0.0337796	48.34
Q6UY14	ADAMTS-like protein 4	60477000	8757600	17414000	3.40723e-06	5.17189e-07	9.63366e-07	0.0292303	0.00443635	0.00826292	0.0139765	0.013348	95.503
Q8N6C8	Leukocyte immunoglobulin-like receptor subfamily A member 3	34734000	33990000	28768000	1.95689e-06	2.00732e-06	1.59149e-06	0.041214	0.0422706	0.0335113	0.0389986	0.00478145	12.2606
Q86Y38	Xylosyltransferase 1	18816000	38209000	33047000	1.06008e-06	2.25647e-06	1.82821e-06	0.00985269	0.0209696	0.0169883	0.0159369	0.00563255	35.3429
P24593	Insulin-like growth factor-binding protein 5	67149000	88097000	57909000	3.78313e-06	5.20266e-06	3.20361e-06	0.123726	0.17013	0.104752	0.132869	0.0336345	25.314
P0DP25	Calmodulin-3	39276000	27822000	50868000	2.21278e-06	1.64306e-06	2.81409e-06	0.131396	0.0975527	0.167067	0.132005	0.034761	26.3331
P07996	Thrombospondin-1	50322000	192410000	113390000	2.83511e-06	1.1363e-05	6.27289e-06	0.0219083	0.0877963	0.0484638	0.0527228	0.0331498	62.8756
O00533	Neural cell adhesion molecule L1-like protein	241550000	119530000	146340000	1.36088e-05	7.05897e-06	8.09573e-06	0.100732	0.0522436	0.059912	0.0709625	0.0260645	36.73
P07333	Macrophage colony-stimulating factor 1 receptor	34275000	83775000	48344000	1.93103e-06	4.94742e-06	2.67446e-06	0.0178794	0.0458022	0.0247576	0.0294798	0.014548	49.3492
A0A087WSZ0	Immunoglobulin kappa variable 1D-8	147080000	90164000	53136000	8.28639e-06	5.32473e-06	2.93956e-06	0.64537	0.414653	0.228894	0.429639	0.208642	48.5621
P02775	Platelet basic protein	106500000	131980000	131340000	6.00014e-06	7.79422e-06	7.26591e-06	0.431758	0.560785	0.522733	0.505092	0.0662974	13.1258
A0A075B6Q5	Immunoglobulin heavy variable 3-64	149340000	94442000	110870000	8.41372e-06	5.57737e-06	6.13348e-06	0.652541	0.432508	0.475595	0.520215	0.116606	22.4149
P26022	Pentraxin-related protein PTX3	78016000	27964000	37104000	4.39537e-06	1.65144e-06	2.05264e-06	0.104692	0.03933	0.048881	0.0643008	0.0353038	54.9042
P08865	40S ribosomal protein SA	96906000	77426000	110060000	5.45962e-06	4.57247e-06	6.08867e-06	0.166143	0.139128	0.185247	0.163506	0.0231724	14.1722
Q10588	ADP-ribosyl cyclase/cyclic ADP-ribose hydrolase 2	191880000	138170000	96912000	1.08104e-05	8.15977e-06	5.36131e-06	0.302544	0.228333	0.150012	0.226963	0.0762749	33.6067
Q06830	Peroxiredoxin-1	159890000	152380000	146910000	9.0081e-06	8.99896e-06	8.12726e-06	0.407334	0.406869	0.367428	0.393877	0.0229067	5.8157
A0A0B4J1Z2	Immunoglobulin kappa variable 1D-43	10833000000	11638000000	3931000000	0.000610324	0.000687294	0.000217468	46.9777	52.8954	16.7354	38.8695	19.3957	49.8995
Q8N474	Secreted frizzled-related protein 1	69572000	71146000	16104000	3.91964e-06	4.2016e-06	8.90895e-07	0.110747	0.118699	0.0251666	0.084871	0.0518582	61.1023
P15924	Desmoplakin	125550000	59227000	76881000	7.07341e-06	3.49771e-06	4.25316e-06	0.0213156	0.010539	0.0128142	0.0148896	0.00568019	38.1487
P11226	Mannose-binding protein C	83191000	56361000	105520000	4.68693e-06	3.32846e-06	5.83751e-06	0.179242	0.127274	0.223197	0.176571	0.0480176	27.1945
P23528	Cofilin-1	19912000	38260000	12772000	1.12183e-06	2.25948e-06	7.06565e-07	0.0606198	0.122079	0.0381725	0.0736238	0.0434386	59.0008
A0A075B6K5	Immunoglobulin lambda variable 3-9	1720500000	1001000000	1234700000	9.69318e-05	5.91151e-05	6.83053e-05	7.8585	4.79199	5.53653	6.06234	1.59945	26.3833
P14324	Farnesyl pyrophosphate synthase	63557000	13697000	14285000	3.58076e-06	8.08891e-07	7.90266e-07	0.0741583	0.0167501	0.0163632	0.0357572	0.0332569	93.0075
Q15063	Periostin	56345000	19938000	198240000	3.17444e-06	1.17746e-06	1.09669e-05	0.034012	0.0126141	0.117479	0.0547016	0.0554093	101.294
Q9HCB6	Spondin-1	130080000	118380000	97936000	7.32862e-06	6.99105e-06	5.41795e-06	0.0805409	0.0768212	0.0595305	0.0722976	0.0112119	15.508
A0A087WSY4	Immunoglobulin heavy variable 4-30-2	2500200000	3062500000	1334300000	0.00014086	0.000180859	7.38153e-05	10.8122	13.8808	5.66481	10.1193	4.15159	41.0265
P01715	Immunoglobulin lambda variable 3-1	1846800000	1754900000	1629600000	0.000104048	0.000103637	9.01517e-05	8.46008	8.42566	7.3287	8.07148	0.643496	7.97247
P04430	Immunoglobulin kappa variable 1-16	405680000	452240000	388100000	2.28557e-05	2.67075e-05	2.14702e-05	1.81097	2.11589	1.70084	1.8759	0.215011	11.4617
P15311	Ezrin	489700000	293610000	376150000	2.75894e-05	1.73394e-05	2.08091e-05	0.397387	0.249719	0.299665	0.315591	0.0751112	23.8002
P00441	Superoxide dismutase [Cu-Zn]	27282000	43651000	28908000	1.53705e-06	2.57786e-06	1.59923e-06	0.0964307	0.161708	0.100311	0.119483	0.0366189	30.6478
P08637	Low affinity immunoglobulin gamma Fc region receptor III-A	238510000	285110000	216030000	1.34375e-05	1.68375e-05	1.19511e-05	0.461845	0.578628	0.410672	0.483715	0.0860871	17.7971
Q99969	Retinoic acid receptor responder protein 2	135560000	169990000	287120000	7.63736e-06	1.00389e-05	1.58839e-05	0.410148	0.53905	0.852832	0.600677	0.227686	37.9049
Q7Z794	Keratin, type II cytoskeletal 1b	103860000	318710000	93833000	5.8514e-06	1.88218e-05	5.19097e-06	0.0945081	0.303958	0.0838239	0.160763	0.124125	77.2099
P01743	Immunoglobulin heavy variable 1-46	683100000	515400000	614450000	3.84854e-05	3.04375e-05	3.39922e-05	2.97511	2.35267	2.62722	2.65167	0.311942	11.764
P24592	Insulin-like growth factor-binding protein 6	252430000	340130000	246690000	1.42217e-05	2.00867e-05	1.36472e-05	0.561515	0.79298	0.53872	0.631072	0.140679	22.2921
P01704	Immunoglobulin lambda variable 2-14	4872600000	4136000000	3865000000	0.000274519	0.000244256	0.000213817	21.7877	19.3834	16.9665	19.3792	2.41062	12.4392
P05060	Secretogranin-1	88624000	40220000	82971000	4.99302e-06	2.37523e-06	4.59007e-06	0.0637745	0.0303343	0.0586156	0.0509081	0.0180032	35.364
A0A075B6S2	Immunoglobulin kappa variable 2D-29	1152200000	674030000	1088800000	6.49142e-05	3.98055e-05	6.02339e-05	4.93801	3.02761	4.58103	4.18222	1.01572	24.2867
A0A0C4DH34	Immunoglobulin heavy variable 4-28	11570000000	11835000000	9672100000	0.000651846	0.000698928	0.000535074	49.6576	53.2375	40.7535	47.8828	6.42846	13.4254
Q92743	Serine protease HTRA1	160360000	111160000	61676000	9.03458e-06	6.56467e-06	3.412e-06	0.176123	0.127957	0.0665009	0.123527	0.0549451	44.4803
P81605	Dermcidin	700290000	912460000	516760000	3.94539e-05	5.38863e-05	2.85879e-05	3.49569	4.77382	2.53242	3.60065	1.12438	31.2272
P69892	Hemoglobin subunit gamma-2	236350000	114010000	163490000	1.33158e-05	6.73298e-06	9.04449e-06	0.825558	0.41738	0.560628	0.601189	0.20709	34.4467
P43121	Cell surface glycoprotein MUC18	114160000	79244000	124370000	6.4317e-06	4.67984e-06	6.88032e-06	0.0898001	0.0653321	0.096044	0.0837254	0.0162321	19.3873
A0A0C4DH43	Immunoglobulin heavy variable 2-70D	361170000	183110000	269120000	2.03481e-05	1.08138e-05	1.48881e-05	1.52822	0.812053	1.11792	1.15273	0.359352	31.1739
P20774	Mimecan	94068000	135320000	210670000	5.29973e-06	7.99146e-06	1.16546e-05	0.156199	0.235503	0.343424	0.245042	0.0939764	38.3511
P41222	Prostaglandin-H2 D-isomerase	251370000	369730000	211990000	1.4162e-05	2.18348e-05	1.17276e-05	0.673307	1.03796	0.557451	0.75624	0.250761	33.1589
A0A075B6H9	Immunoglobulin lambda variable 4-69	181630000	80122000	235700000	1.02329e-05	4.73169e-06	1.30392e-05	0.800964	0.370318	1.02041	0.730565	0.330717	45.2686
P06331	Immunoglobulin heavy variable 4-34	18197000000	17579000000	17012000000	0.00102521	0.00103815	0.000941127	74.1938	75.1206	68.0949	72.4697	3.81697	5.26699
P01599	Immunoglobulin kappa variable 1-17	17672000000	21147000000	23918000000	0.000995629	0.00124886	0.00132318	77.9007	97.7015	103.508	93.0366	13.4257	14.4305
P01619	Immunoglobulin kappa variable 3-20	26045000000	30460000000	29349000000	0.00146736	0.00179885	0.00162363	116.831	143.205	129.246	129.761	13.1949	10.1686
P55072	Transitional endoplasmic reticulum ATPase	64814000	39369000	81488000	3.65158e-06	2.32498e-06	4.50803e-06	0.0408727	0.0260205	0.0504487	0.039114	0.0123087	31.4687
P60842	Eukaryotic initiation factor 4A-I	88147000	36391000	85126000	4.96614e-06	2.14911e-06	4.70929e-06	0.107579	0.0465489	0.101993	0.0853737	0.033739	39.5192
P07099	Epoxide hydrolase 1	101950000	71808000	100860000	5.7438e-06	4.2407e-06	5.57971e-06	0.108457	0.0800643	0.105337	0.0979525	0.01557	15.8955
Q03167	Transforming growth factor beta receptor type 3	143660000	87698000	75566000	8.09371e-06	5.1791e-06	4.18042e-06	0.086547	0.0553736	0.0446924	0.0622044	0.0217473	34.9611
Q9UNW1	Multiple inositol polyphosphate phosphatase 1	90026000	56339000	105320000	5.07201e-06	3.32716e-06	5.82645e-06	0.0921131	0.060417	0.105793	0.0861076	0.0232763	27.0316
P14625	Endoplasmin	62725000	78635000	71954000	3.53389e-06	4.64387e-06	3.98059e-06	0.0382092	0.0502042	0.0430302	0.0438145	0.00603584	13.7759
Q9NPH3	Interleukin-1 receptor accessory protein	201070000	204680000	186470000	1.13282e-05	1.20876e-05	1.03158e-05	0.173129	0.184711	0.157624	0.171821	0.0135911	7.91
P54802	Alpha-N-acetylglucosaminidase	127850000	68646000	69667000	7.20299e-06	4.05396e-06	3.85407e-06	0.0875395	0.0492624	0.0468298	0.0612106	0.022834	37.304
P12830	Cadherin-1	123300000	91487000	94755000	6.94664e-06	5.40286e-06	5.24198e-06	0.0712652	0.0554205	0.053766	0.0601506	0.00966102	16.0614
O14786	Neuropilin-1	1472800000	842670000	1327800000	8.29766e-05	4.97648e-05	7.34557e-05	0.80441	0.482379	0.711963	0.666251	0.165811	24.8872
P02776	Platelet factor 4	207790000	155070000	104710000	1.17068e-05	9.15782e-06	5.7927e-06	1.07923	0.844139	0.533911	0.819093	0.273521	33.3931
P34096	Ribonuclease 4	458040000	368890000	357720000	2.58057e-05	2.17852e-05	1.97896e-05	1.53207	1.29321	1.17466	1.33332	0.182052	13.6541
P02745	Complement C1q subcomponent subunit A	974710000	337020000	1147000000	5.49145e-05	1.99031e-05	6.34536e-05	2.11034	0.76477	2.43799	1.77104	0.886718	50.0677
P01034	Cystatin-C	273830000	281260000	265310000	1.54274e-05	1.66101e-05	1.46773e-05	0.97627	1.05098	0.928611	0.985287	0.06168	6.2601
P20851	C4b-binding protein beta chain	1316100000	484110000	723290000	7.41482e-05	2.85896e-05	4.00134e-05	2.61425	1.00786	1.41046	1.67752	0.835832	49.8253
P83110	Serine protease HTRA3	222410000	139230000	54995000	1.25304e-05	8.22237e-06	3.0424e-06	0.257735	0.169102	0.0625654	0.163134	0.0977218	59.9026
A0A0B4J1Y8	Immunoglobulin lambda variable 9-49	750390000	950530000	976840000	4.22765e-05	5.61345e-05	5.40401e-05	3.24535	4.30861	4.14752	3.90049	0.573061	14.692
Q15485	Ficolin-2	316360000	197180000	183110000	1.78235e-05	1.16447e-05	1.01299e-05	0.524093	0.342363	0.297804	0.388087	0.119874	30.8884
Q9Y5Y7	Lymphatic vessel endothelial hyaluronic acid receptor 1	93933000	143070000	118230000	5.29212e-06	8.44915e-06	6.54065e-06	0.150257	0.239862	0.185667	0.191928	0.0451295	23.5137
P16070	CD44 antigen	944450000	775850000	668230000	5.32097e-05	4.58186e-05	3.69674e-05	0.652443	0.561744	0.453191	0.555793	0.0997595	17.949
Q12913	Receptor-type tyrosine-protein phosphatase eta	0	57088000	94439000	0	3.37139e-06	5.2245e-06	0	0.0230933	0.0357838	0.0196257	0.0181422	92.4409
P55056	Apolipoprotein C-IV	827540000	779600000	887320000	4.66231e-05	4.60401e-05	4.90878e-05	3.20299	3.16253	3.37161	3.24571	0.110895	3.41667
P08294	Extracellular superoxide dismutase [Cu-Zn]	511790000	289450000	327230000	2.88339e-05	1.70938e-05	1.81028e-05	1.11515	0.661016	0.69998	0.825382	0.251701	30.4951
P55290	Cadherin-13	129520000	116630000	130550000	7.29707e-06	6.88771e-06	7.22221e-06	0.0931904	0.0879512	0.0922152	0.0911189	0.00278636	3.05794
P52823	Stanniocalcin-1	98711000	71604000	156910000	5.56131e-06	4.22865e-06	8.68048e-06	0.2013	0.153043	0.314138	0.222827	0.0826771	37.1036
P19961	Alpha-amylase 2B	75634000	68885000	59390000	4.26117e-06	4.06808e-06	3.28554e-06	0.0738231	0.0704688	0.0569088	0.0670669	0.00895558	13.3532
A0A0J9YX35	Immunoglobulin heavy variable 3-64D	1689500000	1876500000	1473200000	9.51853e-05	0.000110819	8.14995e-05	7.422	8.63989	6.35354	7.47181	1.14399	15.3107
P01714	Immunoglobulin lambda variable 3-19	2523400000	3184000000	3453800000	0.000142167	0.000188034	0.000191069	11.8034	15.6095	15.8602	14.4244	2.27331	15.7602
A0M8Q6	Immunoglobulin lambda constant 7	1183000000	877340000	936830000	6.66494e-05	5.18122e-05	5.18267e-05	5.92154	4.60273	4.60365	5.04264	0.761153	15.0943
P23083	Immunoglobulin heavy variable 1-2	2524700000	1766900000	1780500000	0.00014224	0.000104346	9.84997e-05	10.8681	7.97175	7.52451	8.78813	1.81516	20.6547
A0A0B4J1V6	Immunoglobulin heavy variable 3-73	806000000	712880000	736880000	4.54095e-05	4.20999e-05	4.07652e-05	3.53086	3.27309	3.16908	3.32434	0.186254	5.60273
A0A075B6R2	Immunoglobulin heavy variable 4-4	2127700000	2127700000	1588500000	0.000119873	0.000125654	8.7878e-05	9.3281	9.77666	6.83694	8.64723	1.58372	18.3148
P22692	Insulin-like growth factor-binding protein 4	158590000	155180000	144970000	8.93486e-06	9.16432e-06	8.01994e-06	0.319787	0.327958	0.286982	0.311576	0.021687	6.96041
P98066	Tumor necrosis factor-inducible gene 6 protein	99000000	44701000	54094000	5.5776e-06	2.63986e-06	2.99255e-06	0.178714	0.0845739	0.0958656	0.119718	0.0514029	42.9368
P01700	Immunoglobulin lambda variable 1-47	13041000000	21289000000	20525000000	0.000734721	0.00125724	0.00113547	59.8033	102.321	92.4035	84.8427	22.2446	26.2186
P09211	Glutathione S-transferase P	417710000	428150000	425840000	2.35335e-05	2.52848e-05	2.35581e-05	1.00738	1.08221	1.00823	1.03261	0.0429619	4.16053
P06702	Protein S100-A9	368470000	234560000	215330000	2.07594e-05	1.38522e-05	1.19124e-05	1.56735	1.04572	0.899209	1.17076	0.351185	29.9963
A0A0B4J1V0	Immunoglobulin heavy variable 3-15	3560400000	7228100000	4989500000	0.000200591	0.000426863	0.000276026	15.5151	33.0123	21.3453	23.2909	8.90938	38.2527
A0A0C4DH38	Immunoglobulin heavy variable 5-51	3996900000	2875000000	1840400000	0.000225183	0.000169786	0.000101813	17.7635	13.3918	8.02987	13.0617	4.8752	37.3243
Q9UNN8	Endothelial protein C receptor	168420000	158080000	159810000	9.48867e-06	9.33558e-06	8.84091e-06	0.355691	0.349907	0.331341	0.345646	0.0127222	3.6807
A0A075B6S5	Immunoglobulin kappa variable 1-27	644260000	872650000	701110000	3.62972e-05	5.15353e-05	3.87864e-05	2.85496	4.05299	3.05012	3.31936	0.642798	19.3651
P0DP09	Immunoglobulin kappa variable 1-13	1413700000	846410000	890720000	7.96469e-05	4.99856e-05	4.92759e-05	6.33542	3.97553	3.91878	4.74324	1.37915	29.0762
A0A0C4DH33	Immunoglobulin heavy variable 1-24	346770000	214420000	316880000	1.95368e-05	1.26628e-05	1.75302e-05	1.52313	0.987091	1.36641	1.29221	0.275614	21.3289
P02462	Collagen alpha-1(IV) chain	886660000	754840000	806280000	4.99538e-05	4.45779e-05	4.46045e-05	0.310959	0.277458	0.277602	0.288673	0.0193001	6.68581
A0A0B4J1X5	Immunoglobulin heavy variable 3-74	53035000000	44698000000	51621000000	0.00298796	0.00263969	0.00285574	232.675	205.529	222.334	220.179	13.7009	6.2226
P0DJI8	Serum amyloid A-1 protein	820740000	759790000	937540000	4.624e-05	4.48702e-05	5.1866e-05	3.41635	3.31472	3.83123	3.52077	0.273626	7.77178
P62987	Ubiquitin-60S ribosomal protein L40	418970000	249870000	372290000	2.36045e-05	1.47563e-05	2.05956e-05	1.60235	1.00158	1.39781	1.33391	0.305439	22.898
P09172	Dopamine beta-hydroxylase	78310000	47463000	62351000	4.41193e-06	2.80298e-06	3.44934e-06	0.0638681	0.0405713	0.0499231	0.0514542	0.0117236	22.7846
P22626	Heterogeneous nuclear ribonucleoproteins A2/B1	43565000	75947000	48958000	2.45442e-06	4.48513e-06	2.70842e-06	0.0655614	0.119789	0.0723311	0.0858939	0.0295487	34.4014
Q14697	Neutral alpha-glucosidase AB	114620000	126360000	99805000	6.45762e-06	7.46232e-06	5.52135e-06	0.060412	0.0698022	0.0516424	0.0606189	0.00908168	14.9816
P02452	Collagen alpha-1(I) chain	76750000	101650000	26931000	4.32404e-06	6.00305e-06	1.48986e-06	0.031115	0.0431912	0.0107185	0.0283416	0.016413	57.9115
P62258	14-3-3 protein epsilon	272450000	79252000	177460000	1.53497e-05	4.68031e-06	9.81733e-06	0.526029	0.160372	0.336368	0.340923	0.182871	53.6399
O00299	Chloride intracellular channel protein 1	189520000	148450000	144590000	1.06774e-05	8.76687e-06	7.99892e-06	0.396521	0.325528	0.296989	0.339679	0.0512527	15.0886
P00918	Carbonic anhydrase 2	190740000	213240000	32837000	1.07462e-05	1.25931e-05	1.81659e-06	0.367362	0.430445	0.0620879	0.286632	0.197002	68.73
O60687	Sushi repeat-containing protein SRPX2	263460000	94775000	135290000	1.48432e-05	5.59704e-06	7.48443e-06	0.280153	0.105626	0.141233	0.175671	0.092219	52.4954
Q86U17	Serpin A11	187080000	112440000	156380000	1.054e-05	6.64026e-06	8.65116e-06	0.224259	0.141267	0.184033	0.183186	0.0415025	22.6559
P13473	Lysosome-associated membrane glycoprotein 2	61459000	16443000	64579000	3.46256e-06	9.71059e-07	3.5726e-06	0.0769977	0.0215909	0.0794282	0.0593389	0.0327134	55.1297
A0A075B6I0	Immunoglobulin lambda variable 8-61	5872600000	4311300000	4392700000	0.000330858	0.000254608	0.00024301	25.8145	19.8627	18.9564	21.5446	3.72556	17.2923
Q8WWA0	Intelectin-1	303570000	194760000	95316000	1.71029e-05	1.15018e-05	5.27301e-06	0.489095	0.328875	0.150762	0.322911	0.169246	52.4125
A0A0A0MS15	Immunoglobulin heavy variable 3-49	3333000000	2002500000	2298500000	0.000187779	0.00011826	0.000127156	14.3795	9.05478	9.73519	11.0565	2.89785	26.2095
A0A075B6J9	Immunoglobulin lambda variable 2-18	570250000	441670000	416600000	3.21275e-05	2.60833e-05	2.30469e-05	2.58787	2.10074	1.85604	2.18155	0.372546	17.0772
P22314	Ubiquitin-like modifier-activating enzyme 1	37343000	47481000	90939000	2.10388e-06	2.80404e-06	5.03087e-06	0.0178484	0.0237851	0.0426708	0.0281014	0.0129619	46.1254
P04040	Catalase	215370000	142090000	148800000	1.21338e-05	8.39127e-06	8.23182e-06	0.203016	0.14038	0.137701	0.160366	0.0369602	23.0475
P30041	Peroxiredoxin-6	143740000	554680000	97304000	8.09822e-06	3.27572e-05	5.38299e-06	0.323406	1.30801	0.214928	0.615447	0.602223	97.8512
Q86UD1	Out at first protein homolog	55086000	83701000	62387000	3.10351e-06	4.94305e-06	3.45133e-06	0.101109	0.161019	0.112418	0.124849	0.0318307	25.4954
P07359	Platelet glycoprotein Ib alpha chain	113710000	75835000	109360000	6.40635e-06	4.47852e-06	6.04995e-06	0.0895312	0.062581	0.0845329	0.0788817	0.0143363	18.1745
Q8IWY4	Signal peptide, CUB and EGF-like domain-containing protein 1	64235000	75863000	100650000	3.61896e-06	4.48017e-06	5.5681e-06	0.0335296	0.0415034	0.0515777	0.0422036	0.00904439	21.4304
P08709	Coagulation factor VII	760400000	468350000	448480000	4.28404e-05	2.76589e-05	2.48105e-05	0.830175	0.535914	0.480687	0.615592	0.187875	30.5194
O00187	Mannan-binding lectin serine protease 2	564300000	459490000	496730000	3.17923e-05	2.71357e-05	2.74798e-05	0.419876	0.358331	0.362847	0.380351	0.0343041	9.01905
P08572	Collagen alpha-2(IV) chain	342340000	428910000	265280000	1.92872e-05	2.53297e-05	1.46757e-05	0.115088	0.151125	0.0875528	0.117922	0.0318809	27.0355
P01703	Immunoglobulin lambda variable 1-40	1126600000	1490800000	1263600000	6.34719e-05	8.80408e-05	6.99041e-05	5.15879	7.15475	5.6804	5.99798	1.03518	17.2589
B9A064	Immunoglobulin lambda-like polypeptide 5	24390000000	20221000000	20968000000	0.00137412	0.00119417	0.00115998	59.5682	51.761	50.2749	53.868	4.99212	9.26731
A0A0B4J1Y9	Immunoglobulin heavy variable 3-72	7802000000	14804000000	15922000000	0.00043956	0.000874266	0.000880827	33.2853	66.1945	66.686	55.3886	19.1436	34.5624
P01877	Immunoglobulin heavy constant alpha 2	3395100000	4964300000	6659300000	0.000191278	0.000293172	0.000368402	5.22633	8.00939	10.0639	7.76652	2.42789	31.2609
P01615	Immunoglobulin kappa variable 2D-28	27945000000	33928000000	34716000000	0.0015744	0.00200365	0.00192054	121.484	154.586	148.161	141.41	17.5533	12.413
Q9Y6R7	IgGFc-binding protein	20280000	33664000	112020000	1.14256e-06	1.98806e-06	6.1971e-06	0.00199702	0.00347438	0.0108293	0.00543358	0.00473089	87.0676
P13639	Elongation factor 2	183010000	56989000	115380000	1.03107e-05	3.36555e-06	6.38298e-06	0.108126	0.0352895	0.0669235	0.0701131	0.0365231	52.0916
Q16658	Fascin	150170000	215780000	121900000	8.46048e-06	1.27431e-05	6.74368e-06	0.155122	0.233614	0.123619	0.170785	0.0566455	33.1677
Q14623	Indian hedgehog protein	101460000	108120000	109250000	5.71619e-06	6.38514e-06	6.04386e-06	0.126298	0.14106	0.13351	0.133622	0.00738173	5.52433
P07195	L-lactate dehydrogenase B chain	373370000	429640000	425150000	2.10354e-05	2.53728e-05	2.35199e-05	0.574019	0.692291	0.641683	0.635997	0.0593404	9.3303
Q01459	Di-N-acetylchitobiase	245330000	279700000	321570000	1.38217e-05	1.6518e-05	1.77897e-05	0.315793	0.377347	0.406367	0.366502	0.0462507	12.6195
Q9HDC9	Adipocyte plasma membrane-associated protein	177020000	192510000	134230000	9.97319e-06	1.13689e-05	7.42579e-06	0.214523	0.244513	0.159696	0.206244	0.0430107	20.8542
P12955	Xaa-Pro dipeptidase	93181000	67016000	125550000	5.24976e-06	3.9577e-06	6.9456e-06	0.0962204	0.0725296	0.127276	0.0986754	0.0274558	27.8244
O14498	Immunoglobulin superfamily containing leucine-rich repeat protein	137250000	130110000	148300000	7.73258e-06	7.68378e-06	8.20416e-06	0.168074	0.166992	0.178288	0.171118	0.00623258	3.64227
Q13421	Mesothelin	141290000	118340000	202580000	7.96019e-06	6.98869e-06	1.1207e-05	0.115365	0.101273	0.162387	0.126342	0.0320017	25.3295
P48740	Mannan-binding lectin serine protease 1	318650000	194940000	196540000	1.79525e-05	1.15124e-05	1.08729e-05	0.226493	0.145224	0.137146	0.169621	0.0494179	29.1343
P61626	Lysozyme C	683700000	1506400000	884100000	3.85192e-05	8.8962e-05	4.89096e-05	2.32877	5.37773	2.95634	3.55428	1.61003	45.2982
P55268	Laminin subunit beta-2	142570000	42414000	84667000	8.0323e-06	2.5048e-06	4.6839e-06	0.0409765	0.0127765	0.0238898	0.0258809	0.014205	54.8861
P15151	Poliovirus receptor	408270000	556150000	455740000	2.30017e-05	3.2844e-05	2.52122e-05	0.507632	0.724753	0.556301	0.596228	0.113935	19.1092
P62805	Histone H4	250570000	284450000	227890000	1.4117e-05	1.67985e-05	1.26072e-05	1.24166	1.47732	1.10864	1.27587	0.18671	14.6339
P13598	Intercellular adhesion molecule 2	120590000	114200000	64907000	6.79396e-06	6.7442e-06	3.59074e-06	0.221586	0.219935	0.117089	0.186203	0.0598608	32.1481
Q16270	Insulin-like growth factor-binding protein 7	218720000	157950000	157230000	1.23225e-05	9.3279e-06	8.69818e-06	0.422928	0.320107	0.298473	0.347169	0.0664949	19.1534
P01701	Immunoglobulin lambda variable 1-51	8486900000	6631600000	8952200000	0.000478146	0.000391636	0.000495248	39.0272	31.9619	40.4147	37.1346	4.53305	12.2071
P18065	Insulin-like growth factor-binding protein 2	127120000	162180000	175460000	7.16186e-06	9.57771e-06	9.70669e-06	0.205674	0.275017	0.278698	0.253129	0.0411392	16.2522
P62937	Peptidyl-prolyl cis-trans isomerase A	336360000	162180000	181100000	1.89503e-05	9.57771e-06	1.00187e-05	1.05187	0.531558	0.555989	0.713138	0.293602	41.1704
P00558	Phosphoglycerate kinase 1	84527000	126790000	125620000	4.7622e-06	7.48772e-06	6.94947e-06	0.106719	0.167776	0.155703	0.143399	0.0323344	22.5485
P11142	Heat shock cognate 71 kDa protein	196190000	208000000	113280000	1.10532e-05	1.22837e-05	6.26681e-06	0.155872	0.173201	0.0883558	0.139143	0.0448283	32.2174
P08253	72 kDa type IV collagenase	283720000	207260000	250620000	1.59846e-05	1.224e-05	1.38646e-05	0.21631	0.165614	0.187583	0.189836	0.0254225	13.3919
Q15113	Procollagen C-endopeptidase enhancer 1	41801000	79767000	92031000	2.35504e-06	4.71072e-06	5.09128e-06	0.0490815	0.0981637	0.106086	0.0844436	0.0308796	36.5683
Q6EMK4	Vasorin	281790000	771540000	324900000	1.58759e-05	4.55641e-05	1.79739e-05	0.221336	0.635158	0.250535	0.36901	0.230953	62.5874
A0A0B4J1U7	Immunoglobulin heavy variable 6-1	5966700000	3840700000	6671000000	0.00033616	0.000226817	0.000369049	24.9305	16.8191	27.3639	23.0379	5.5213	23.9662
P02655	Apolipoprotein C-II	4062000000	3343200000	4507000000	0.00022885	0.000197436	0.000249333	20.2766	17.491	22.0869	19.9515	2.31512	11.6038
Q15166	Serum paraoxonase/lactonase 3	188300000	290060000	322080000	1.06087e-05	1.71298e-05	1.78179e-05	0.267792	0.432346	0.449678	0.383272	0.100384	26.1912
P13647	Keratin, type II cytoskeletal 5	1230600000	1196500000	1447300000	6.93312e-05	7.06606e-05	8.00666e-05	1.11123	1.13239	1.28303	1.17555	0.0936796	7.969
P12109	Collagen alpha-1(VI) chain	429470000	348000000	340430000	2.41961e-05	2.05515e-05	1.88331e-05	0.222896	0.189298	0.173455	0.195216	0.0252459	12.9323
P08238	Heat shock protein HSP 90-beta	723430000	540690000	797860000	4.07576e-05	3.1931e-05	4.41387e-05	0.489399	0.383364	0.529889	0.467551	0.075666	16.1835
A0A0J9YXX1	Immunoglobulin heavy variable 5-10-1	4866300000	5196700000	4251900000	0.000274164	0.000306897	0.000235221	21.4614	24.0206	18.4092	21.2971	2.80934	13.1912
P02042	Hemoglobin subunit delta	2154300000	2744200000	2485100000	0.000121372	0.000162062	0.000137479	7.55813	10.0907	8.5594	8.73608	1.27549	14.6003
P54108	Cysteine-rich secretory protein 3	1226800000	1124800000	1082300000	6.91171e-05	6.64262e-05	5.98743e-05	2.50099	2.40331	2.16609	2.3568	0.172225	7.3076
Q15848	Adiponectin	2146800000	1798000000	1879300000	0.000120949	0.000106183	0.000103965	4.57818	4.01872	3.93449	4.17713	0.349862	8.37566
Q13822	Ectonucleotide pyrophosphatase/phosphodiesterase family member 2	98919000	159250000	90928000	5.57303e-06	9.40468e-06	5.03026e-06	0.0562851	0.0949709	0.0507929	0.0673496	0.0240778	35.7505
P02741	C-reactive protein	439020000	509790000	472580000	2.47341e-05	3.01062e-05	2.61438e-05	0.98765	1.20201	1.04372	1.07779	0.111166	10.3142
P39060	Collagen alpha-1(XVIII) chain	193550000	133790000	232320000	1.09045e-05	7.90111e-06	1.28523e-05	0.0611827	0.0443257	0.0720963	0.0592016	0.0139909	23.6326
P05362	Intercellular adhesion molecule 1	175040000	120720000	112000000	9.86164e-06	7.12925e-06	6.19599e-06	0.170506	0.123248	0.107106	0.13362	0.0329484	24.6583
P60174	Triosephosphate isomerase	160600000	158900000	220400000	9.0481e-06	9.38401e-06	1.21928e-05	0.293792	0.30466	0.39582	0.331424	0.0560326	16.9066
Q9BXR6	Complement factor H-related protein 5	488690000	333340000	449700000	2.75325e-05	1.96857e-05	2.4878e-05	0.427305	0.305484	0.386028	0.372939	0.0619561	16.6129
P01591	Immunoglobulin J chain	12524000000	9866700000	10312000000	0.000705594	0.000582688	0.000570474	38.979	32.1852	31.5081	34.2241	4.13176	12.0727
P19021	Peptidyl-glycine alpha-amidating monooxygenase	215800000	414910000	338180000	1.2158e-05	2.45029e-05	1.87086e-05	0.112207	0.22611	0.172627	0.170315	0.0569868	33.4596
P04275	von Willebrand factor	88656000	95172000	140950000	4.99482e-06	5.62048e-06	7.79755e-06	0.0161474	0.0181677	0.0252029	0.0198394	0.00475357	23.9603
P01817	Immunoglobulin heavy variable 2-5	4039500000	4126200000	3647600000	0.000227583	0.000243677	0.00020179	17.197	18.4108	15.2449	16.9509	1.59725	9.42278
P01602	Immunoglobulin kappa variable 1-5	10777000000	6886100000	7803000000	0.000607169	0.000406666	0.000431673	47.4954	31.8071	33.7603	37.6876	8.54976	22.6859
P05111	Inhibin alpha chain	1117700000	712330000	862600000	6.29705e-05	4.20674e-05	4.77202e-05	1.58706	1.0601	1.20245	1.2832	0.272603	21.2439
P07900	Heat shock protein HSP 90-alpha	177100000	127390000	121830000	9.9777e-06	7.52315e-06	6.7398e-06	0.117832	0.0888337	0.0795776	0.0954145	0.0199583	20.9175
P01594	Immunoglobulin kappa variable 1-33	2065500000	3718300000	2817900000	0.000116369	0.000219588	0.00015589	9.05541	17.0854	12.1283	12.7564	4.05165	31.7618
P11021	Endoplasmic reticulum chaperone BiP	103590000	94192000	169700000	5.83619e-06	5.56261e-06	9.38804e-06	0.0806689	0.0768775	0.129736	0.0957609	0.0294845	30.7898
P02747	Complement C1q subcomponent subunit C	3003300000	3829900000	3941700000	0.000169204	0.000226179	0.00021806	6.56375	8.77279	8.45724	7.93126	1.19476	15.0639
P61769	Beta-2-microglobulin	2393400000	2422200000	2814800000	0.000134843	0.000143046	0.000155719	9.83037	10.427	11.3499	10.5358	0.765597	7.26663
P01721	Immunoglobulin lambda variable 6-57	749240000	1294700000	1445900000	4.22117e-05	7.64599e-05	7.99892e-05	3.35848	6.08258	6.36284	5.26797	1.65959	31.5035
P04433	Immunoglobulin kappa variable 3-11	21363000000	34397000000	32588000000	0.00120358	0.00203135	0.00180281	95.6914	161.483	143.304	133.493	33.9757	25.4513
P06312	Immunoglobulin kappa variable 4-1	6034800000	4198000000	3664800000	0.000339997	0.000247917	0.000202742	25.4054	18.5226	15.1462	19.6914	5.22849	26.5521
P14151	L-selectin	638290000	837380000	544870000	3.59608e-05	4.94524e-05	3.0143e-05	0.852232	1.17182	0.714207	0.912752	0.234731	25.7168
P69905	Hemoglobin subunit alpha	137270000000	118510000000	120940000000	0.0077337	0.00699873	0.00669057	506.787	458.565	438.34	467.897	35.1647	7.51547
P80748	Immunoglobulin lambda variable 3-21	5582800000	4526900000	3868500000	0.000314531	0.000267341	0.000214011	25.2663	21.4727	17.1879	21.3089	4.04167	18.967
Q6UX71	Plexin domain-containing protein 2	311100000	211710000	339460000	1.75272e-05	1.25028e-05	1.87794e-05	0.294106	0.209769	0.315053	0.272976	0.0557316	20.4163
Q92820	Gamma-glutamyl hydrolase	233000000	414560000	259420000	1.31271e-05	2.44823e-05	1.43515e-05	0.364927	0.680511	0.398883	0.48144	0.173234	35.9824
P25391	Laminin subunit alpha-1	73355000	163240000	188410000	4.13277e-06	9.64031e-06	1.04231e-05	0.0122579	0.0285897	0.0309087	0.0239188	0.010165	42.4979
P09455	Retinol-binding protein 1	289800000	113250000	229400000	1.63271e-05	6.6881e-06	1.26907e-05	1.02988	0.421817	0.800339	0.75068	0.307059	40.9042
Q6UXB8	Peptidase inhibitor 16	646320000	420170000	388270000	3.64132e-05	2.48136e-05	2.14796e-05	0.735894	0.501406	0.434003	0.557101	0.158464	28.4445
P06858	Lipoprotein lipase	295990000	267790000	257660000	1.66759e-05	1.58146e-05	1.42541e-05	0.313613	0.297378	0.268013	0.293001	0.023113	7.88838
O95497	Pantetheinase	263830000	187350000	199560000	1.4864e-05	1.10642e-05	1.10399e-05	0.260666	0.194004	0.193564	0.216078	0.0386149	17.8708
P36980	Complement factor H-related protein 2	562950000	385940000	562790000	3.17162e-05	2.27921e-05	3.11343e-05	1.03457	0.74337	1.01537	0.931103	0.162865	17.4916
A0A0C4DH68	Immunoglobulin kappa variable 2-24	12490000000	17843000000	18881000000	0.000703678	0.00105374	0.00104452	53.7906	80.5395	79.8289	71.3863	15.2425	21.3521
P02656	Apolipoprotein C-III	17926000000	15582000000	21168000000	0.00100994	0.000920211	0.00117104	93.0448	84.7674	107.865	95.2257	11.7021	12.2888
P0C0L5	Complement C4-B	12381000000	12634000000	11911000000	0.000697537	0.000746114	0.000658933	3.61809	3.86956	3.41715	3.63494	0.226678	6.23608
P78539	Sushi repeat-containing protein SRPX	534680000	378490000	444650000	3.01235e-05	2.23521e-05	2.45987e-05	0.583992	0.433276	0.476785	0.498018	0.0775691	15.5756
P39059	Collagen alpha-1(XV) chain	487800000	344120000	420750000	2.74823e-05	2.03224e-05	2.32765e-05	0.193878	0.143349	0.164173	0.167134	0.0253944	15.1941
P19320	Vascular cell adhesion protein 1	37466000	43858000	44508000	2.11081e-06	2.59008e-06	2.46224e-06	0.0259656	0.0318572	0.0302824	0.0293684	0.00305027	10.3862
P68104	Elongation factor 1-alpha 1	438750000	369050000	480090000	2.47189e-05	2.17946e-05	2.65592e-05	0.492892	0.434527	0.529478	0.485632	0.0478903	9.86144
P32119	Peroxiredoxin-2	608870000	867570000	564820000	3.43033e-05	5.12353e-05	3.12466e-05	1.5666	2.33956	1.42671	1.77762	0.491655	27.658
P04070	Vitamin K-dependent protein C	559000000	498620000	463390000	3.14937e-05	2.94465e-05	2.56354e-05	0.604692	0.565313	0.492108	0.554038	0.0571327	10.3121
O75636	Ficolin-3	2165500000	1732800000	1804900000	0.000122003	0.000102332	9.98496e-05	3.70716	3.10906	3.03339	3.2832	0.369104	11.2422
Q14515	SPARC-like protein 1	116400000	102460000	109320000	6.5579e-06	6.05088e-06	6.04773e-06	0.0871793	0.0804288	0.0803806	0.0826629	0.00391138	4.73172
P33151	Cadherin-5	273550000	471610000	560870000	1.54116e-05	2.78514e-05	3.10281e-05	0.176041	0.318095	0.354348	0.282828	0.0942401	33.3206
P22352	Glutathione peroxidase 3	2053500000	2063900000	1614400000	0.000115693	0.000121886	8.93108e-05	4.52677	4.76847	3.49378	4.26301	0.677041	15.8818
P11047	Laminin subunit gamma-1	181400000	208680000	228930000	1.022e-05	1.23238e-05	1.26647e-05	0.0575325	0.0693671	0.0712803	0.0660599	0.00744673	11.2727
P49747	Cartilage oligomeric matrix protein	465710000	459380000	594600000	2.62378e-05	2.71292e-05	3.28941e-05	0.316584	0.327297	0.396817	0.346899	0.0435602	12.557
P02746	Complement C1q subcomponent subunit B	3633400000	3647800000	3904600000	0.000204703	0.000215425	0.000216008	7.65912	8.05923	8.08042	7.93292	0.237355	2.99203
Q13790	Apolipoprotein F	3253000000	4811500000	5138300000	0.000183272	0.000284148	0.000284258	5.17621	8.02426	8.02672	7.07573	1.64504	23.249
P01033	Metalloproteinase inhibitor 1	1201400000	2168200000	2764900000	6.76861e-05	0.000128045	0.000152958	2.92053	5.52421	6.59849	5.01441	1.89124	37.716
P02654	Apolipoprotein C-I	69255000000	42645000000	54705000000	0.00390178	0.00251845	0.00302636	418.027	269.785	324.169	337.327	74.9917	22.2311
P19652	Alpha-1-acid glycoprotein 2	28249000000	25040000000	23283000000	0.00159153	0.00147876	0.00128805	67.4175	62.6327	54.5507	61.5336	6.50346	10.569
P63261	Actin, cytoplasmic 2	3509500000	4087100000	3434200000	0.000197723	0.000241368	0.000189985	4.7301	5.77348	4.54404	5.01587	0.662667	13.2114
Q5SZK8	FRAS1-related extracellular matrix protein 2	77165000	183480000	143980000	4.34743e-06	1.08356e-05	7.96517e-06	0.0123779	0.0308469	0.0226735	0.0219661	0.00925481	42.1322
Q76LX8	A disintegrin and metalloproteinase with thrombospondin motifs 13	164930000	146690000	172470000	9.29205e-06	8.66293e-06	9.54128e-06	0.0604821	0.05638	0.0620915	0.0596512	0.00294504	4.93711
P02786	Transferrin receptor protein 1	384330000	309080000	453830000	2.16529e-05	1.8253e-05	2.51065e-05	0.255075	0.214997	0.295698	0.255257	0.040351	15.808
P17936	Insulin-like growth factor-binding protein 3	3261300000	2969500000	4140200000	0.00018374	0.000175367	0.000229042	5.79971	5.53472	7.22817	6.18753	0.910903	14.7216
Q9UHG3	Prenylcysteine oxidase 1	549080000	397960000	471980000	3.09348e-05	2.35019e-05	2.61106e-05	0.546058	0.414801	0.460806	0.473888	0.0665994	14.0538
P04075	Fructose-bisphosphate aldolase A	669000000	455300000	748310000	3.7691e-05	2.68882e-05	4.13975e-05	0.955934	0.681862	1.04972	0.89584	0.191152	21.3377
Q86YZ3	Hornerin	642650000	217530000	630160000	3.62065e-05	1.28465e-05	3.48613e-05	0.128187	0.0454763	0.123399	0.0990207	0.0464326	46.8918
P06276	Cholinesterase	287390000	415430000	332000000	1.61914e-05	2.45337e-05	1.83667e-05	0.236606	0.358467	0.268339	0.287804	0.0632193	21.9661
P11597	Cholesteryl ester transfer protein	703320000	506070000	625470000	3.96246e-05	2.98865e-05	3.46019e-05	0.723502	0.545625	0.631662	0.633596	0.0889543	14.0396
P49908	Selenoprotein P	2814400000	3133900000	2705400000	0.000158561	0.000185076	0.000149666	3.67191	4.28537	3.46521	3.8075	0.426561	11.2032
Q9NQ79	Cartilage acidic protein 1	341610000	605020000	602020000	1.92461e-05	3.57301e-05	3.33046e-05	0.26942	0.50011	0.466123	0.411884	0.124543	30.2373
P08779	Keratin, type I cytoskeletal 16	243480000	123190000	302730000	1.37175e-05	7.27511e-06	1.67474e-05	0.267512	0.141858	0.326533	0.245301	0.09432	38.4507
P35542	Serum amyloid A-4 protein	24264000000	30149000000	21146000000	0.00136702	0.00178048	0.00116983	92.6844	120.702	79.2983	97.5615	21.1283	21.6564
P05452	Tetranectin	6531300000	5548200000	5747200000	0.000367969	0.000327655	0.000317943	16.3238	14.5335	14.1017	14.9863	1.17826	7.8622
P0C0L4	Complement C4-A	369190000000	357100000000	382580000000	0.0207999	0.0210889	0.0211649	107.871	109.356	109.741	108.99	0.987354	0.905915
P14618	Pyruvate kinase PKM	353000000	352350000	805090000	1.98878e-05	2.08084e-05	4.45387e-05	0.343198	0.359039	0.768433	0.490223	0.241067	49.1749
P00338	L-lactate dehydrogenase A chain	1091400000	882030000	1029900000	6.14888e-05	5.20892e-05	5.69755e-05	1.67563	1.4193	1.55232	1.54908	0.128195	8.27555
Q9NZP8	Complement C1r subcomponent-like protein	3651800000	3667500000	4244700000	0.00020574	0.000216588	0.000234823	3.84493	4.04714	4.38752	4.0932	0.274215	6.69928
P09486	SPARC	1935200000	2076900000	2140700000	0.000109028	0.000122654	0.000118426	3.14751	3.54041	3.41813	3.36868	0.201063	5.96861
P02533	Keratin, type I cytoskeletal 14	4727600000	3055000000	4260100000	0.00026635	0.000180416	0.000235675	5.16461	3.49788	4.56887	4.41045	0.844582	19.1495
P15144	Aminopeptidase N	332380000	434990000	483390000	1.87261e-05	2.56888e-05	2.67418e-05	0.170915	0.234435	0.244025	0.216458	0.039732	18.3555
P04180	Phosphatidylcholine-sterol acyltransferase	2661400000	2385800000	2499400000	0.000149942	0.000140896	0.00013827	3.02377	2.84099	2.78782	2.88419	0.123764	4.2911
P00488	Coagulation factor XIII A chain	3339400000	2836300000	3074700000	0.00018814	0.000167501	0.000170097	2.25902	2.01094	2.04195	2.10397	0.135166	6.42433
P22891	Vitamin K-dependent protein Z	240270000	371020000	357130000	1.35367e-05	2.1911e-05	1.97569e-05	0.302477	0.489539	0.441378	0.411132	0.0971298	23.625
P04406	Glyceraldehyde-3-phosphate dehydrogenase	913220000	952110000	994220000	5.14502e-05	5.62279e-05	5.50016e-05	1.42677	1.55905	1.52493	1.50358	0.0686799	4.56774
P05090	Apolipoprotein D	29522000000	34480000000	32849000000	0.00166325	0.00203625	0.00181725	78.1618	95.6782	85.3812	86.4071	8.80315	10.188
P15169	Carboxypeptidase N catalytic chain	5463400000	3957000000	4126700000	0.000307804	0.000233685	0.000228295	5.88567	4.46782	4.36443	4.90598	0.850017	17.3262
P23142	Fibulin-1	2902700000	2711500000	2493600000	0.000163536	0.00016013	0.000137949	2.11753	2.07317	1.78586	1.99219	0.180059	9.03827
P33908	Mannosyl-oligosaccharide 1,2-alpha-mannosidase IA	429090000	522250000	416670000	2.41747e-05	3.0842e-05	2.30508e-05	0.331234	0.422534	0.315769	0.356512	0.0576969	16.1837
P08263	Glutathione S-transferase A1	984440000	844750000	1436100000	5.54627e-05	4.98876e-05	7.9447e-05	2.16343	1.94571	3.09834	2.40249	0.612375	25.4891
P35443	Thrombospondin-4	1105400000	1041100000	1129400000	6.22775e-05	6.14832e-05	6.248e-05	0.588119	0.580544	0.589909	0.58619	0.00497132	0.848072
P13796	Plastin-2	741090000	651720000	683450000	4.17525e-05	3.8488e-05	3.78094e-05	0.593893	0.547388	0.537694	0.559659	0.0300416	5.36785
P68871	Hemoglobin subunit beta	162810000000	108880000000	146630000000	0.00917261	0.00643002	0.00811177	573.237	401.789	506.836	493.954	86.4467	17.501
P22105	Tenascin-X	391520000	436420000	432930000	2.2058e-05	2.57732e-05	2.39503e-05	0.0481113	0.0562075	0.0522278	0.0521822	0.00404832	7.75805
Q5D862	Filaggrin-2	349350000	581140000	226700000	1.96822e-05	3.43198e-05	1.25414e-05	0.0793241	0.1383	0.0505344	0.0893861	0.0447396	50.052
P27918	Properdin	1492700000	1431400000	1603400000	8.40977e-05	8.45328e-05	8.87023e-05	1.63975	1.64802	1.72917	1.67231	0.0494135	2.9548
P00915	Carbonic anhydrase 1	1611800000	1513500000	1886100000	9.08078e-05	8.93813e-05	0.000104342	3.14473	3.09493	3.61267	3.28411	0.285627	8.69723
P01861	Immunoglobulin heavy constant gamma 4	20307000000	33074000000	41388000000	0.00114408	0.00195322	0.00228964	31.8263	54.3281	63.6805	49.9449	16.3732	32.7824
P08571	Monocyte differentiation antigen CD14	1340300000	1526700000	1728800000	7.55116e-05	9.01609e-05	9.56396e-05	1.88381	2.24898	2.38545	2.17274	0.259365	11.9372
P68363	Tubulin alpha-1B chain	875190000	706850000	736550000	4.93076e-05	4.17438e-05	4.0747e-05	0.982972	0.832076	0.812143	0.875731	0.0934074	10.6662
P15309	Prostatic acid phosphatase	2279400000	2643200000	3290600000	0.00012842	0.000156097	0.000182041	2.88095	3.5014	4.08302	3.48846	0.60114	17.2323
O95445	Apolipoprotein M	5656000000	5942800000	8876400000	0.000318655	0.000350958	0.000491055	14.9902	16.5077	23.0955	18.1978	4.30884	23.6778
P00739	Haptoglobin-related protein	8388900000	7963300000	4972200000	0.000472625	0.000470281	0.000275069	12.107	12.0454	7.04484	10.3991	2.90502	27.9353
P00746	Complement factor D	2807500000	2840500000	2692800000	0.000158173	0.000167749	0.000148969	5.84984	6.2032	5.50833	5.85379	0.347455	5.93555
P02763	Alpha-1-acid glycoprotein 1	138920000000	135290000000	108070000000	0.00782666	0.00798969	0.00597858	332.822	339.711	254.182	308.905	47.517	15.3824
P47972	Neuronal pentraxin-2	1611700000	1338300000	1647600000	9.08021e-05	7.90347e-05	9.11475e-05	1.92986	1.67955	1.9368	1.84874	0.146563	7.92775
P51884	Lumican	5612700000	4527000000	4200800000	0.000316216	0.000267347	0.000232394	8.22681	6.95452	6.04481	7.07538	1.09601	15.4904
P02750	Leucine-rich alpha-2-glycoprotein	15943000000	20102000000	17651000000	0.000898218	0.00118714	0.000976478	23.5227	31.0851	25.5669	26.7249	3.91197	14.6379
Q9UGM5	Fetuin-B	2792800000	2491600000	2756900000	0.000157345	0.000147144	0.000152516	3.74068	3.49773	3.62513	3.62118	0.121524	3.35593
P06733	Alpha-enolase	813270000	758700000	762160000	4.58191e-05	4.48058e-05	4.21637e-05	0.971194	0.949594	0.893529	0.938106	0.0400868	4.27316
P01860	Immunoglobulin heavy constant gamma 3	124760000000	131590000000	136960000000	0.0070289	0.00777119	0.00757682	170.208	188.159	183.438	180.602	9.30548	5.15248
P18428	Lipopolysaccharide-binding protein	5214100000	4840600000	4746200000	0.000293759	0.000285867	0.000262566	5.50168	5.35318	4.91647	5.25711	0.304204	5.78653
Q12805	EGF-containing fibulin-like extracellular matrix protein 1	1172500000	957130000	1191400000	6.60579e-05	5.65243e-05	6.59099e-05	1.20871	1.03413	1.20575	1.14953	0.099948	8.69469
Q15582	Transforming growth factor-beta-induced protein ig-h3	1475100000	1282100000	1547700000	8.31062e-05	7.57158e-05	8.56209e-05	1.11259	1.01352	1.14602	1.09071	0.068906	6.31753
Q04756	Hepatocyte growth factor activator	2621100000	2378500000	2615100000	0.000147671	0.000140465	0.000144671	2.08881	1.98663	2.04595	2.04046	0.0513143	2.51483
P02743	Serum amyloid P-component	10234000000	11620000000	12808000000	0.000576577	0.000686231	0.000708556	22.7066	27.0215	27.8984	25.8755	2.77916	10.7405
P04278	Sex hormone-binding globulin	5969900000	5083100000	4877400000	0.00033634	0.000300188	0.000269824	7.68104	6.85454	6.16073	6.89877	0.761115	11.0326
P05160	Coagulation factor XIII B chain	1460100000	1429400000	1711900000	8.22611e-05	8.44147e-05	9.47047e-05	1.08917	1.11754	1.25367	1.15346	0.0879352	7.62358
P43251	Biotinidase	4121100000	3446200000	4460500000	0.00023218	0.000203519	0.000246761	3.7972	3.32803	4.03483	3.72002	0.359663	9.66831
O00391	Sulfhydryl oxidase 1	1792000000	1403300000	1732800000	0.00010096	8.28733e-05	9.58609e-05	1.22236	1.00324	1.16038	1.12866	0.112946	10.0071
P16112	Aggrecan core protein	510930000	606030000	741960000	2.87855e-05	3.57897e-05	4.10462e-05	0.110126	0.136905	0.157001	0.134677	0.0235164	17.4613
Q9UK55	Protein Z-dependent protease inhibitor	3785400000	2334400000	2935600000	0.000213267	0.00013786	0.000162401	4.20505	2.71789	3.20146	3.3748	0.758583	22.4779
O43866	CD5 antigen-like	1250000000	1342700000	1140700000	7.04242e-05	7.92946e-05	6.31051e-05	1.84864	2.08122	1.65617	1.86201	0.21284	11.4307
P02652	Apolipoprotein A-II	94326000000	90848000000	110460000000	0.00531427	0.00536512	0.0061108	475.447	479.936	546.597	500.66	39.8459	7.95867
P02765	Alpha-2-HS-glycoprotein	107420000000	130790000000	113120000000	0.00605197	0.00772394	0.00625795	153.805	196.271	159.007	169.694	23.1627	13.6497
P07360	Complement component C8 gamma chain	15902000000	15966000000	16736000000	0.000895908	0.000942889	0.000925859	40.2081	42.3112	41.5437	41.3543	1.06424	2.57346
P55058	Phospholipid transfer protein	4781000000	3747500000	4434000000	0.000269358	0.000221313	0.000245295	4.91972	4.04166	4.47929	4.48022	0.439029	9.79926
P12111	Collagen alpha-3(VI) chain	851240000	826040000	724640000	4.79583e-05	4.87827e-05	4.00881e-05	0.139518	0.141898	0.116598	0.132671	0.0139705	10.5302
P00740	Coagulation factor IX	6144900000	5507800000	5259000000	0.0003462	0.000325269	0.000290935	6.6848	6.27984	5.61653	6.19372	0.539316	8.70747
P01834	Immunoglobulin kappa constant	319760000000	292600000000	322790000000	0.0180151	0.0172798	0.0178572	1530.91	1468.24	1517.18	1505.45	32.9428	2.18824
P01876	Immunoglobulin heavy constant alpha 1	208540000000	196530000000	197060000000	0.011749	0.0116063	0.0109016	311.958	308.129	289.399	303.162	12.0721	3.98205
P02753	Retinol-binding protein 4	20031000000	21568000000	19830000000	0.00112853	0.00127372	0.00109702	49.0348	55.3361	47.6558	50.6756	4.09461	8.08005
Q16610	Extracellular matrix protein 1	4716300000	3408000000	4451600000	0.000265713	0.000201263	0.000246269	4.37849	3.31604	4.05724	3.91726	0.544883	13.9098
P02760	Protein AMBP	15579000000	21932000000	22525000000	0.000877711	0.00129522	0.00124611	22.5011	33.2002	31.939	29.2134	5.84711	20.0152
P03951	Coagulation factor XI	810730000	1247700000	1198000000	4.5676e-05	7.36842e-05	6.6275e-05	0.651369	1.05065	0.944929	0.882316	0.206873	23.4466
P00742	Coagulation factor X	3322100000	4064600000	4273600000	0.000187165	0.000240039	0.000236421	3.41899	4.3843	4.31788	4.04039	0.53917	13.3445
P01880	Immunoglobulin heavy constant delta	12516000000	12552000000	12851000000	0.000705143	0.000741271	0.000710935	16.646	17.4966	16.7793	16.974	0.457518	2.69541
P05154	Plasma serine protease inhibitor	6486300000	4420200000	5251100000	0.000365434	0.00026104	0.000290498	7.9992	5.71332	6.35757	6.69003	1.17865	17.618
P05543	Thyroxine-binding globulin	12280000000	13218000000	14773000000	0.000691847	0.000780603	0.000817263	14.9318	16.8452	17.6349	16.4706	1.38994	8.43894
P25311	Zinc-alpha-2-glycoprotein	36473000000	33850000000	34225000000	0.00205487	0.00199905	0.00189337	59.9692	58.3327	55.2448	57.8489	2.39906	4.14712
P36955	Pigment epithelium-derived factor	19268000000	16579000000	19797000000	0.00108555	0.00097909	0.0010952	23.4348	21.1339	23.6383	22.7357	1.39088	6.11759
P80108	Phosphatidylinositol-glycan-specific phospholipase D	1878400000	2410600000	2391000000	0.000105828	0.000142361	0.000132273	1.14588	1.54125	1.43193	1.37302	0.204163	14.8696
P01859	Immunoglobulin heavy constant gamma 2	254490000000	235580000000	223880000000	0.0143378	0.0139124	0.0123853	399.296	387.4	344.85	377.182	28.6248	7.58912
O14791	Apolipoprotein L1	6651600000	6220600000	5982600000	0.000374747	0.000367364	0.000330966	8.52018	8.35126	7.52322	8.13155	0.533557	6.56156
P00738	Haptoglobin	197570000000	168260000000	207230000000	0.011131	0.00993677	0.0114642	246.18	219.74	253.499	239.806	17.7589	7.40549
P07093	Glia-derived nexin	8191100000	6189000000	6450100000	0.000461481	0.000365498	0.000356828	10.4855	8.30355	8.10595	8.96499	1.32048	14.7293
Q96IY4	Carboxypeptidase B2	7551500000	7385500000	7639400000	0.000425447	0.000436158	0.000422622	8.78398	9.00398	8.72386	8.83727	0.147473	1.66876
Q96KN2	Beta-Ala-His dipeptidase	5280500000	8318100000	7768700000	0.0002975	0.000491234	0.000429775	5.24532	8.66001	7.57595	7.16043	1.74485	24.368
P02649	Apolipoprotein E	41292000000	35291000000	41572000000	0.00232636	0.00208415	0.00229982	64.3322	57.6266	63.585	61.8479	3.67479	5.94166
P07357	Complement component C8 alpha chain	12834000000	11914000000	13659000000	0.000723059	0.000703594	0.000755635	11.0938	10.7937	11.5912	11.1596	0.40277	3.60919
P22792	Carboxypeptidase N subunit 2	10596000000	10689000000	10279000000	0.000596972	0.00063125	0.000568648	9.85606	10.4207	9.3865	9.88774	0.51781	5.23689
P27169	Serum paraoxonase/arylesterase 1	27283000000	31733000000	33849000000	0.00153711	0.00187403	0.00187257	38.6795	47.1517	47.1114	44.3142	4.87982	11.0119
P26927	Hepatocyte growth factor-like protein	4053400000	3562800000	3722600000	0.000228366	0.000210405	0.000205939	2.84263	2.61872	2.56294	2.67476	0.148027	5.53422
P01857	Immunoglobulin heavy constant gamma 1	721060000000	703290000000	689800000000	0.0406241	0.0415335	0.0381607	1124.92	1149.96	1056.49	1110.46	48.3841	4.35714
P07225	Vitamin K-dependent protein S	6284900000	6883400000	6305600000	0.000354087	0.000406506	0.000348834	4.71248	5.40943	4.64162	4.92118	0.424321	8.62235
P29622	Kallistatin	15052000000	12771000000	14176000000	0.00084802	0.000754205	0.000784236	17.4664	15.5322	16.1493	16.3826	0.988015	6.03086
P08185	Corticosteroid-binding globulin	19698000000	20283000000	16888000000	0.00110977	0.00119783	0.000934267	24.5798	26.5269	20.6884	23.9317	2.97272	12.4217
P00736	Complement C1r subcomponent	4465200000	4825500000	4788800000	0.000251566	0.000284975	0.000264923	3.13928	3.55572	3.30527	3.33342	0.209646	6.28921
Q14520	Hyaluronan-binding protein 2	11361000000	9399000000	10503000000	0.000640071	0.000555068	0.00058104	10.211	8.85382	9.26737	9.44406	0.695633	7.36582
P02766	Transthyretin	74074000000	35432000000	38429000000	0.00417328	0.00209247	0.00212595	262.629	131.665	133.76	176.018	75.0146	42.6176
P05155	Plasma protease C1 inhibitor	92274000000	89780000000	104900000000	0.00519866	0.00530205	0.00580321	94.2369	96.0988	105.174	98.5032	5.85158	5.9405
P01871	Immunoglobulin heavy constant mu	27371000000	25985000000	26326000000	0.00154206	0.00153457	0.00145639	31.1846	31.0291	29.4459	30.5532	0.96206	3.1488
P04196	Histidine-rich glycoprotein	55022000000	54932000000	67632000000	0.0030999	0.00324407	0.0037415	52.0198	54.4321	62.7735	56.4085	5.64267	10.0032
P09871	Complement C1s subcomponent	6681300000	7060600000	7642900000	0.00037642	0.000416971	0.000422816	4.90766	5.43566	5.51142	5.28491	0.328897	6.22332
P10909	Clusterin	85300000000	81711000000	108590000000	0.00480575	0.00482553	0.00600735	91.5288	91.8938	114.391	99.2711	13.0951	13.1913
P13611	Versican core protein	4019900000	4126500000	3789100000	0.000226479	0.000243695	0.000209618	0.607344	0.653429	0.562014	0.607595	0.0457081	7.52278
P02748	Complement component C9	34307000000	32830000000	31237000000	0.00193283	0.00193881	0.00172807	30.5893	30.68	27.3431	29.5375	1.90091	6.43561
P02749	Beta-2-glycoprotein 1	38236000000	36676000000	42030000000	0.00215419	0.00216594	0.00232516	56.2361	56.5355	60.6867	57.8194	2.48762	4.30239
Q12889	Oviduct-specific glycoprotein	10565000000	8226200000	8958100000	0.000595225	0.000485807	0.000495574	7.89045	6.43915	6.56809	6.96589	0.803276	11.5316
P35908	Keratin, type II cytoskeletal 2 epidermal	15200000000	9441900000	12791000000	0.000856358	0.000557601	0.000707616	13.0849	8.51892	10.81	10.8046	2.28302	21.13
Q08380	Galectin-3-binding protein	9100100000	8248100000	8735700000	0.000512694	0.0004871	0.000483271	7.84607	7.45344	7.39426	7.56459	0.245556	3.24612
P04003	C4b-binding protein alpha chain	10119000000	8545200000	10308000000	0.000570098	0.000504646	0.000570253	8.50291	7.52574	8.50346	8.17737	0.564329	6.90111
P35858	Insulin-like growth factor-binding protein complex acid labile subunit	21702000000	18915000000	19628000000	0.00122268	0.00111705	0.00108585	18.5119	16.9104	16.4368	17.2864	1.08741	6.29058
P00748	Coagulation factor XII	33352000000	31767000000	32465000000	0.00187903	0.00187603	0.00179601	27.712	27.6643	26.4822	27.2862	0.696702	2.55331
P05156	Complement factor I	10964000000	12649000000	11986000000	0.000617705	0.000747	0.000663082	9.39273	11.3573	10.0806	10.2769	0.996891	9.70031
P05546	Heparin cofactor 2	50266000000	38233000000	48844000000	0.00283195	0.00225789	0.00270212	49.6118	39.55	47.3275	45.4964	5.27492	11.5941
P08697	Alpha-2-antiplasmin	47726000000	26448000000	38918000000	0.00268885	0.00156191	0.002153	49.2674	28.615	39.4408	39.1078	10.3302	26.4147
P10643	Complement component C7	13720000000	10088000000	14774000000	0.000772976	0.000595757	0.000817318	8.26384	6.3684	8.7361	7.78945	1.25311	16.0873
O75882	Attractin	6744100000	5382600000	5827500000	0.000379958	0.000317875	0.000322385	2.39609	2.00433	2.03261	2.14434	0.21848	10.1887
P04217	Alpha-1B-glycoprotein	165050000000	150890000000	135720000000	0.00929881	0.00891097	0.00750822	171.36	164.192	138.334	157.962	17.372	10.9976
Q96PD5	N-acetylmuramoyl-L-alanine amidase	15776000000	15061000000	15844000000	0.00088881	0.000889443	0.000876512	14.2828	14.2912	14.0823	14.2187	0.118261	0.831726
P02679	Fibrinogen gamma chain	105150000000	89747000000	99227000000	0.00592408	0.0053001	0.00548937	114.981	102.857	106.522	108.12	6.21805	5.75104
P07358	Complement component C8 beta chain	15675000000	16880000000	16393000000	0.000883119	0.000996866	0.000906883	13.169	14.8633	13.5206	13.851	0.894153	6.45553
P01011	Alpha-1-antichymotrypsin	138380000000	106090000000	124740000000	0.00779624	0.00626526	0.00690079	163.58	131.44	144.761	146.594	16.148	11.0155
Q06033	Inter-alpha-trypsin inhibitor heavy chain H3	6214300000	7072600000	7186700000	0.00035011	0.00041768	0.000397578	3.50567	4.18172	3.98016	3.88918	0.347085	8.92435
P06681	Complement C2	15806000000	17323000000	17040000000	0.0008905	0.00102303	0.000942676	10.6922	12.2819	11.3164	11.4302	0.800932	7.00718
P03952	Plasma kallikrein	26028000000	22928000000	26740000000	0.0014664	0.00135404	0.00147929	20.5423	18.9658	20.7187	20.0756	0.965126	4.80746
P04004	Vitronectin	144340000000	132350000000	137220000000	0.00813202	0.00781607	0.0075912	149.715	143.88	139.729	144.441	5.0165	3.47304
P06727	Apolipoprotein A-IV	146190000000	125410000000	130700000000	0.00823625	0.00740622	0.0072305	181.384	163.084	159.202	167.89	11.8464	7.05603
P01008	Antithrombin-III	164760000000	116770000000	158100000000	0.00928247	0.00689597	0.00874631	176.428	131.052	166.203	157.895	23.8017	15.0744
P01042	Kininogen-1	123730000000	114200000000	98227000000	0.00697087	0.0067442	0.00543405	96.8547	93.6933	75.4862	88.6781	11.5333	13.0058
P02774	Vitamin D-binding protein	201430000000	224680000000	218330000000	0.0113484	0.0132687	0.0120783	214.411	250.66	228.154	231.075	18.3	7.9195
P43652	Afamin	45539000000	36994000000	49028000000	0.00256564	0.00218472	0.0027123	37.1386	31.6206	39.2534	36.0042	3.94082	10.9455
P00734	Prothrombin	67517000000	60122000000	68521000000	0.00380386	0.00355057	0.00379068	54.3013	50.6789	54.1019	53.0274	2.03624	3.83999
P04264	Keratin, type II cytoskeletal 1	36211000000	31221000000	33974000000	0.0020401	0.00184379	0.00187949	30.8862	27.9105	28.4487	29.0818	1.58566	5.45242
P35527	Keratin, type I cytoskeletal 9	14148000000	7214700000	15254000000	0.000797089	0.000426072	0.000843872	12.8403	6.86268	13.5911	11.098	3.68706	33.2227
P01019	Angiotensinogen	148040000000	154140000000	153210000000	0.00834048	0.0091029	0.00847579	156.878	171.197	159.39	162.488	7.64556	4.70531
P02671	Fibrinogen alpha chain	98435000000	96090000000	92126000000	0.00554576	0.0056747	0.00509654	58.3811	59.7308	53.641	57.251	3.19835	5.58654
P02675	Fibrinogen beta chain	102580000000	93489000000	117100000000	0.00577929	0.00552109	0.00647813	103.312	98.684	115.781	105.926	8.84309	8.34838
P02790	Hemopexin	295370000000	290250000000	298870000000	0.016641	0.017141	0.0165339	321.956	331.588	319.818	324.454	6.26999	1.93247
P13671	Complement component C6	14763000000	15030000000	17080000000	0.000831738	0.000887612	0.000944889	7.93548	8.46749	9.01318	8.47205	0.538862	6.36047
P00751	Complement factor B	65890000000	87084000000	80678000000	0.0037122	0.00514284	0.00446322	43.392	60.107	52.1599	51.8863	8.36088	16.1139
P06396	Gelsolin	67562000000	55175000000	66228000000	0.0038064	0.00325842	0.00366382	44.4079	38.0099	42.7357	41.7179	3.31822	7.95394
P02647	Apolipoprotein A-I	981930000000	939060000000	1030700000000	0.0553213	0.0554572	0.0570197	1797.1	1801.29	1851.89	1816.76	30.4977	1.67868
P19823	Inter-alpha-trypsin inhibitor heavy chain H2	108160000000	100020000000	99443000000	0.00609366	0.00590679	0.00550132	57.2267	55.4646	51.6533	54.7815	2.84883	5.20034
P00747	Plasminogen	61967000000	72076000000	65742000000	0.00349118	0.00425652	0.00363694	38.5393	46.982	40.1401	41.8871	4.48428	10.7056
P19827	Inter-alpha-trypsin inhibitor heavy chain H1	118090000000	109600000000	119100000000	0.00665311	0.00647254	0.00658878	65.6049	63.8162	64.9571	64.7927	0.905626	1.39773
P01009	Alpha-1-antitrypsin	728180000000	749290000000	819310000000	0.0410252	0.0442501	0.0453254	877.618	946.485	969.408	931.171	47.7727	5.1304
P20742	Pregnancy zone protein	28135000000	25704000000	27699000000	0.00158511	0.00151798	0.00153235	9.67147	9.26069	9.34762	9.42659	0.216479	2.29647
Q14624	Inter-alpha-trypsin inhibitor heavy chain H4	141700000000	143130000000	143780000000	0.00798329	0.00845269	0.00795411	77.2211	81.7511	76.9229	78.6317	2.70559	3.44084
P08603	Complement factor H	77304000000	86861000000	79440000000	0.00435526	0.00512967	0.00439473	31.3058	36.8676	31.583	33.2521	3.13414	9.42538
P01023	Alpha-2-macroglobulin	193110000000	193080000000	196570000000	0.0108797	0.0114025	0.0108745	66.6137	69.8061	66.5683	67.6627	1.85635	2.74353
P00450	Ceruloplasmin	261750000000	280480000000	269820000000	0.0147468	0.016564	0.0149268	120.652	135.502	122.099	126.084	8.18805	6.4941
P01031	Complement C5	46675000000	49098000000	43335000000	0.00262964	0.00289953	0.00239735	13.9622	15.3932	12.7262	14.0272	1.33469	9.51506
P02787	Serotransferrin	1186000000000	1129300000000	1226000000000	0.0668185	0.066692	0.067824	866.877	865.125	879.74	870.581	7.98062	0.916701
P02751	Fibronectin	87135000000	90715000000	91214000000	0.00490913	0.00535727	0.00504608	18.6889	20.3923	19.2063	19.4292	0.873318	4.49488
P02768	Serum albumin	5470800000000	5171100000000	5634400000000	0.308221	0.305385	0.311703	4442.45	4401	4491.7	4445.05	45.4048	1.02147
P01024	Complement C3	1077500000000	1074200000000	1149300000000	0.0607056	0.063438	0.0635809	324.299	338.853	339.589	334.247	8.62276	2.57976
P04114	Apolipoprotein B-100	36983000000	34354000000	37245000000	0.0020836	0.00202881	0.00206044	4.04025	3.93351	3.99452	3.98943	0.0535519	1.34235
P98160	Basement membrane-specific heparan sulfate proteoglycan core protein	271760000000	233870000000	243390000000	0.0153108	0.0138114	0.0134647	32.6504	29.4493	28.7076	30.2691	2.09535	6.9224

## Sheet: Table S4
Table S4. Functional enrichment analysis of proteins quantified by the Quad-Orbitrap workflow according to their abundance conducted in STRING. All proteins quantified by the Quad-Orbitrap workflow in unfractionated sample were divided into: high abundant proteins (95% of total quantified proteins’ mass – 72 most abundant proteins), medium abundant proteins (4.5% of total quantified proteins’ mas…
Top functional enrichments	All quantified proteins	672 (747)	High abundant proteins (~95%)	60 (72)	Medium abundant proteins (~4.5%)	74 (102)	Low abundant proteins (~0.5%)	234 (264)	Proteins quantified only after immunodepletion	305 (309)
Biological process (GO)	Regulated exocytosis	22.32	Platelet degranulation	36.67	Protein activation cascade	28.38	Regulated exocytosis	22.65	Biological adhesion	20.98
	Leukocyte mediated immunity	20.23	Protein activation cascade	31.67	Regulation of complement activation	24.32	Response to stimulus	73.93	Cell adhesion	20.66
	Secretion by cell	23.96	Regulation of proteolysis	51.67	Regulation of protein activation cascade	24.32	Response to stress	45.3	Regulated exocytosis	18.36
Molecular function (GO)	Glycosaminoglycan binding	9.23	Endopeptidase inhibitor activity	31.67	Serine-type peptidase activity	20.27	Protein binding	58.55	Calcium ion binding	16.39
	Calcium ion binding	14.88	Peptidase regulator activity	33.33	Serine-type endopeptidase activity	18.92	Glycosaminoglycan binding	9.4	Identical protein binding	23.61
	Protein binding	55.06	Enzyme inhibitor activity	36.67	Peptidase regulator activity	17.57	Signaling receptor binding	23.5	Protein binding	53.44
Reactome pathways	Innate Immune System	24.4	Platelet degranulation	33.33	Complement cascade	25.68	Innate Immune System	24.79	Neutrophil degranulation	14.75
	Immune System	30.65	Regulation of Insulin-like Growth Factor (IGF) transport and uptake by Insulin-like Growth Factor Binding Proteins (IGFBPs)	31.67	Regulation of Complement cascade	24.32	Neutrophil degranulation	17.09	Innate Immune System	18.69
	Neutrophil degranulation	14.88	Hemostasis	45	Innate Immune System	35.14	Immune System	32.91	Immune System	25.57

## Sheet: Table S5
Table S5. Functional enrichment analysis of proteins identified in LMW fraction conducted in STRING. All identified proteins and proteins identified exclusively in LMW were analyzed. Three top terms according to calculated FDR value are presented for biological process and molecular function from Gene Ontology database, and pathways from Reactome database. Numbers of proteins successfully uploade…
Top functional enrichments	All proteins identified in LMW	146 (157)	Proteins identified only in LMW	66 (69)
Biological process (GO)	Platelet degranulation	15.75	SRP-dependent cotranslational protein targeting to membrane	22.73
	Negative regulation of biological process	60.96	Nuclear-transcribed mRNA catabolic process, nonsense-mediated decay	22.73
	Transport	54.79	Translational initiation	22.73
Molecular function (GO)	Endopeptidase inhibitor activity	12.33	Structural constituent of ribosome	19.7
	Peptidase regulator activity	13.01	Structural molecule activity	27.27
	Serine-type endopeptidase inhibitor activity	9.59	Chromatin DNA binding	10.61
Reactome pathways	Hemostasis	20.55	Developmental Biology	24.24
	Developmental Biology	14.38	Meiotic synapsis	6.1
	Scavenging of heme from plasma	2.05	Apoptosis	6.1

## Sheet: Table S6
Table S6. List of all proteins identified by the Triple Quad-TOF workflow in pool experiments described in detail in Table S1.
N	Uniprot ID	Protein name	HFF T	HMW T	MF T	MR T	HPLC1 T	HPLC2 T	LMW	HFF LTC	HFF TC	HFF IS
1	P02768	Serum albumin	+	+	+	+	+	+	+	+	+	+
2	P01024	Complement C3	+	+	+	+	+	+	+	+	+	+
3	P02787	Serotransferrin	+	+	+	+	+	+	-	+	+	+
4	P0C0L4	Complement C4-A	+	+	+	-	+	+	-	+	+	+
5	P00450	Ceruloplasmin	+	+	+	+	+	+	-	+	+	+
6	P01023	Alpha-2-macroglobulin	+	+	-	+	+	+	-	+	+	+
7	P01009	Alpha-1-antitrypsin	+	+	+	+	+	+	-	+	+	+
8	P01857	Immunoglobulin heavy constant gamma 1	+	+	-	+	+	+	-	+	+	+
9	P00738	Haptoglobin	+	+	-	+	+	+	-	+	+	+
10	P98160	Basement membrane-specific heparan sulfate proteoglycan core protein	+	+	+	-	+	+	-	+	+	+
11	Q14624	Inter-alpha-trypsin inhibitor heavy chain H4	+	+	+	+	+	+	-	+	+	+
12	P08603	Complement factor H	+	+	+	+	+	+	-	+	+	+
13	P02647	Apolipoprotein A-I	+	+	+	+	+	+	+	+	+	+
14	P00751	Complement factor B	+	+	+	-	+	+	-	+	+	+
15	P01008	Antithrombin-III	+	+	+	+	+	+	-	+	+	+
16	P02774	Vitamin D-binding protein	+	+	+	+	+	+	-	+	+	+
17	P02790	Hemopexin	+	+	+	+	+	+	-	+	+	+
18	P19823	Inter-alpha-trypsin inhibitor heavy chain H2	+	+	+	-	+	+	-	+	+	+
19	P06727	Apolipoprotein A-IV	+	+	+	+	+	+	-	+	+	+
20	P01011	Alpha-1-antichymotrypsin	+	+	+	+	+	+	-	+	+	+
21	P02675	Fibrinogen beta chain	+	+	-	-	+	+	+	+	+	+
22	P02671	Fibrinogen alpha chain	+	+	+	+	+	+	+	+	+	+
23	P01019	Angiotensinogen	+	+	+	+	+	+	-	+	+	+
24	P00747	Plasminogen	+	+	+	-	+	+	-	+	+	+
25	P00734	Prothrombin	+	+	+	-	+	+	-	+	+	+
26	P06396	Gelsolin	+	+	+	-	+	+	-	+	+	+
27	P01876	Immunoglobulin heavy constant alpha 1	+	+	-	+	+	+	-	+	+	+
28	P19827	Inter-alpha-trypsin inhibitor heavy chain H1	+	+	+	-	+	+	-	+	+	+
29	P04217	Alpha-1B-glycoprotein	+	+	+	+	+	+	-	+	+	+
30	P02679	Fibrinogen gamma chain	+	+	-	+	+	+	-	+	+	+
31	P10909	Clusterin	+	+	+	+	+	+	-	+	+	+
32	P02652	Apolipoprotein A-II	+	+	+	+	+	+	-	+	+	+
33	P01859	Immunoglobulin heavy constant gamma 2	+	+	-	+	+	+	-	+	+	+
34	P02749	Beta-2-glycoprotein 1	+	+	+	+	+	+	-	+	+	+
35	P43652	Afamin	+	+	+	+	+	+	-	+	+	+
36	P01042	Kininogen-1	+	+	+	+	+	+	-	+	+	+
37	P01834	Immunoglobulin kappa constant	+	+	+	+	+	+	-	+	+	+
38	P02765	Alpha-2-HS-glycoprotein	+	+	+	+	+	+	-	+	+	+
39	P36955	Pigment epithelium-derived factor	+	+	+	-	+	+	-	+	+	+
40	P04004	Vitronectin	+	+	+	+	+	+	-	+	+	+
41	P02763	Alpha-1-acid glycoprotein 1	+	+	-	+	+	+	-	+	+	+
42	P02748	Complement component C9	+	+	+	-	+	+	-	+	+	+
43	P08697	Alpha-2-antiplasmin	+	+	+	+	+	+	-	+	+	+
44	P01871	Immunoglobulin heavy constant mu	+	+	-	+	+	+	-	+	+	+
45	P04196	Histidine-rich glycoprotein	+	+	+	+	+	+	-	+	+	+
46	P05155	Plasma protease C1 inhibitor	+	+	+	+	+	+	-	+	+	+
47	P68871	Hemoglobin subunit beta	+	+	-	+	+	+	-	+	+	+
48	P05546	Heparin cofactor 2	+	+	+	-	+	+	-	+	+	+
49	P0DOY3	Immunoglobulin lambda constant 3	+	+	-	+	+	-	-	-	-	-
50	P25311	Zinc-alpha-2-glycoprotein	+	+	+	-	+	+	-	+	+	+
51	P27169	Serum paraoxonase/arylesterase 1	+	+	-	+	+	+	-	+	+	+
52	P02766	Transthyretin	+	+	-	+	+	+	-	+	+	+
53	P19652	Alpha-1-acid glycoprotein 2	+	+	-	+	+	+	-	+	+	+
54	P02751	Fibronectin	+	+	+	-	+	+	-	+	+	+
55	P05090	Apolipoprotein D	+	+	-	+	+	+	-	+	+	-
56	P08185	Corticosteroid-binding globulin	+	+	+	+	+	+	-	+	+	+
57	P01780	Immunoglobulin heavy variable 3-7	+	+	-	+	+	-	-	+	+	+
58	P01031	Complement C5	+	+	+	-	+	+	-	+	+	+
59	P69905	Hemoglobin subunit alpha	+	+	-	+	+	+	-	+	+	+
60	P01611	Immunoglobulin kappa variable 1D-12	+	+	-	-	+	+	-	-	-	-
61	P02753	Retinol-binding protein 4	+	+	+	+	+	+	-	+	+	+
62	P0DP03	Immunoglobulin heavy variable 3-30-5	+	+	-	+	+	-	-	+	+	+
63	P04264	Keratin, type II cytoskeletal 1	+	+	+	+	+	+	-	+	+	+
64	P01619	Immunoglobulin kappa variable 3-20	+	+	-	+	+	+	-	-	-	+
65	P02656	Apolipoprotein C-III	+	+	-	+	+	+	-	+	+	+
66	P01860	Immunoglobulin heavy constant gamma 3	+	+	-	+	+	+	-	+	+	+
67	P02760	Protein AMBP	+	+	+	+	+	+	-	+	+	+
68	P29622	Kallistatin	+	+	+	-	+	+	-	+	+	+
69	P06681	Complement C2	+	+	+	-	+	+	-	+	-	+
70	P01782	Immunoglobulin heavy variable 3-9	+	+	-	+	+	-	-	+	-	-
71	Q96PD5	N-acetylmuramoyl-L-alanine amidase	+	+	+	-	+	+	-	+	+	-
72	P02654	Apolipoprotein C-I	+	+	-	+	+	+	-	+	+	+
73	P05156	Complement factor I	+	+	+	-	+	+	-	+	+	+
74	P05543	Thyroxine-binding globulin	+	+	+	-	+	+	-	+	+	+
75	P07357	Complement component C8 alpha chain	+	+	+	-	+	+	-	+	+	-
76	P02743	Serum amyloid P-component	+	+	+	-	+	+	-	+	+	+
77	P20742	Pregnancy zone protein	+	+	-	-	+	+	-	+	+	+
78	P02750	Leucine-rich alpha-2-glycoprotein	+	+	+	-	+	+	-	+	-	+
79	P03952	Plasma kallikrein	+	+	+	+	+	+	-	+	+	+
80	P35858	Insulin-like growth factor-binding protein complex acid labile subunit	+	+	+	-	+	+	-	+	+	-
81	P06312	Immunoglobulin kappa variable 4-1	+	+	-	-	+	-	-	+	+	+
82	P00748	Coagulation factor XII	+	+	+	-	+	+	-	+	+	-
83	P05452	Tetranectin	+	+	+	-	+	+	-	+	+	+
84	P01594	Immunoglobulin kappa variable 1-33	+	+	-	+	+	-	-	-	-	-
85	A0A0C4DH31	Immunoglobulin heavy variable 1-18	+	+	-	+	+	-	-	+	+	-
86	P04278	Sex hormone-binding globulin	+	+	+	+	+	+	-	-	-	+
87	P01714	Immunoglobulin lambda variable 3-19	+	+	-	-	+	-	-	+	+	-
88	P01615	Immunoglobulin kappa variable 2D-28	+	+	-	+	-	-	-	+	+	-
89	O95445	Apolipoprotein M	+	-	-	+	+	+	-	+	-	-
90	P01824	Immunoglobulin heavy variable 4-39	+	+	-	+	-	-	-	-	+	-
91	P04433	Immunoglobulin kappa variable 3-11	+	-	-	-	+	-	-	+	+	+
92	P02649	Apolipoprotein E	+	+	+	+	+	+	-	+	-	-
93	P13645	Keratin, type I cytoskeletal 10	+	+	+	+	+	+	+	+	+	-
94	P80748	Immunoglobulin lambda variable 3-21	+	-	-	+	+	-	-	-	+	+
95	P01718	Immunoglobulin lambda variable 3-27	+	+	-	-	+	-	-	-	+	+
96	P13671	Complement component C6	+	+	+	-	+	+	-	-	-	+
97	P01700	Immunoglobulin lambda variable 1-47	+	+	-	+	+	-	-	+	-	+
98	A0A0C4DH69	Immunoglobulin kappa variable 1-9	+	-	-	-	+	+	-	-	+	+
99	B9A064	Immunoglobulin lambda-like polypeptide 5	+	+	-	+	+	-	-	+	+	-
100	P07358	Complement component C8 beta chain	+	+	+	-	+	+	-	+	+	-
101	P07093	Glia-derived nexin	+	+	+	-	+	+	-	+	+	-
102	P01861	Immunoglobulin heavy constant gamma 4	+	+	-	+	+	-	-	+	+	+
103	P01624	Immunoglobulin kappa variable 3-15	+	-	-	+	+	+	-	+	+	-
104	A0A075B6I9	Immunoglobulin lambda variable 7-46	+	-	-	+	+	-	-	-	-	-
105	P35542	Serum amyloid A-4 protein	+	+	-	+	+	+	-	+	+	-
106	P0C0L5	Complement C4-B	+	+	+	+	+	+	+	+	+	-
107	P00739	Haptoglobin-related protein	+	-	-	+	+	+	-	-	-	-
108	P01877	Immunoglobulin heavy constant alpha 2	+	+	-	+	+	-	-	+	+	+
109	A0A0C4DH72	Immunoglobulin kappa variable 1-6	+	+	-	-	+	-	-	+	-	-
110	P01602	Immunoglobulin kappa variable 1-5	+	+	-	+	+	-	-	+	+	-
111	A0A0A0MS15	Immunoglobulin heavy variable 3-49	+	+	-	+	+	-	-	-	-	-
112	P04114	Apolipoprotein B-100	+	-	+	-	+	+	-	-	-	-
113	P01033	Metalloproteinase inhibitor 1	+	+	+	-	+	+	-	-	-	-
114	P07360	Complement component C8 gamma chain	+	+	+	-	+	+	-	+	+	-
115	A0A075B6I0	Immunoglobulin lambda variable 8-61	+	+	-	-	+	-	-	-	-	+
116	P36980	Complement factor H-related protein 2	+	+	+	-	+	+	-	-	-	-
117	P35527	Keratin, type I cytoskeletal 9	+	+	-	+	+	+	-	+	+	+
118	Q2KHR3	Glutamine and serine-rich protein 1	+	+	-	+	-	-	-	-	-	-
119	Q92922	SWI/SNF complex subunit SMARCC1	+	-	-	-	-	-	-	-	-	-
120	Q9NZP8	Complement C1r subcomponent-like protein	+	-	+	-	+	+	-	+	+	-
121	P02741	C-reactive protein	+	+	+	-	+	+	-	+	+	-
122	P10643	Complement component C7	+	-	+	-	+	+	-	+	-	-
123	P51884	Lumican	+	+	+	-	+	+	-	-	+	-
124	P07988	Pulmonary surfactant-associated protein B	+	+	-	-	-	-	-	-	-	-
125	P02655	Apolipoprotein C-II	+	+	-	-	+	+	-	+	-	-
126	Q8NE71	ATP-binding cassette sub-family F member 1	+	+	-	+	+	-	-	-	-	+
127	Q14520	Hyaluronan-binding protein 2	+	+	+	-	+	+	-	+	+	-
128	Q8N2G8	GH3 domain-containing protein	+	-	-	-	-	-	-	-	-	-
129	Q66K66	Transmembrane protein 198	+	+	-	+	+	-	-	+	+	-
130	P04432	Immunoglobulin kappa variable 1D-39	-	+	-	-	+	-	-	-	+	-
131	P01743	Immunoglobulin heavy variable 1-46	-	+	-	-	+	-	-	+	-	+
132	P18428	Lipopolysaccharide-binding protein	-	+	+	-	+	+	-	-	+	-
133	A0A087WSY6	Immunoglobulin kappa variable 3D-15	-	+	-	-	+	-	-	-	-	-
134	A0A0B4J1Y9	Immunoglobulin heavy variable 3-72	-	+	-	-	+	-	-	+	+	-
135	A0A0C4DH55	Immunoglobulin kappa variable 3D-7	-	+	-	-	+	-	-	-	-	-
136	P01591	Immunoglobulin J chain	-	+	-	+	+	+	-	+	+	-
137	A0A075B6K5	Immunoglobulin lambda variable 3-9	-	+	-	-	+	-	-	-	-	-
138	P04211	Immunoglobulin lambda variable 7-43	-	+	-	-	+	-	-	-	-	-
139	P15309	Prostatic acid phosphatase	-	+	+	-	+	+	-	-	-	-
140	Q12884	Prolyl endopeptidase FAP	-	+	-	-	-	+	-	-	-	-
141	O95613	Pericentrin	-	+	-	-	-	-	-	-	-	-
142	P05154	Plasma serine protease inhibitor	-	+	+	-	+	+	-	+	+	-
143	Q9UKW4	Guanine nucleotide exchange factor VAV3	-	+	-	-	-	-	-	-	-	-
144	Q08380	Galectin-3-binding protein	-	+	-	-	+	+	-	+	+	-
145	P01880	Immunoglobulin heavy constant delta	-	+	-	+	+	+	-	+	+	-
146	Q96KN2	Beta-Ala-His dipeptidase	-	-	+	-	+	+	-	+	-	-
147	Q06033	Inter-alpha-trypsin inhibitor heavy chain H3	-	-	+	-	+	+	-	+	-	-
148	P22792	Carboxypeptidase N subunit 2	-	-	+	-	+	+	-	+	+	-
149	P00742	Coagulation factor X	-	-	+	-	+	+	-	-	-	-
150	P63261	Actin, cytoplasmic 2	-	-	+	-	+	+	-	-	-	-
151	Q16610	Extracellular matrix protein 1	-	-	+	-	+	+	-	+	-	-
152	P13611	Versican core protein	-	-	+	-	+	+	-	+	+	-
153	P15169	Carboxypeptidase N catalytic chain	-	-	+	-	+	+	-	-	-	-
154	P00740	Coagulation factor IX	-	-	+	-	+	+	-	-	-	-
155	P61769	Beta-2-microglobulin	-	-	+	-	+	+	-	-	-	-
156	P43251	Biotinidase	-	-	+	-	+	+	-	-	-	-
157	Q9UK55	Protein Z-dependent protease inhibitor	-	-	+	-	+	+	-	-	-	-
158	P03951	Coagulation factor XI	-	-	+	-	+	+	-	+	-	-
159	Q96IY4	Carboxypeptidase B2	-	-	+	-	+	+	-	-	-	-
160	P09871	Complement C1s subcomponent	-	-	+	-	+	+	-	-	-	-
161	Q9UGM5	Fetuin-B	-	-	+	-	+	+	-	-	-	-
162	O75882	Attractin	-	-	+	-	+	+	-	+	-	-
163	P07225	Vitamin K-dependent protein S	-	-	+	-	+	+	-	+	+	-
164	P08263	Glutathione S-transferase A1	-	-	+	-	+	+	-	-	-	-
165	P17936	Insulin-like growth factor-binding protein 3	-	-	+	-	+	+	-	+	-	-
166	P09486	SPARC	-	-	+	-	+	+	-	-	-	-
167	P08571	Monocyte differentiation antigen CD14	-	-	+	-	+	+	-	-	-	-
168	P04070	Vitamin K-dependent protein C	-	-	+	-	+	+	-	-	-	-
169	P00915	Carbonic anhydrase 1	-	-	+	-	+	+	-	-	-	-
170	P49908	Selenoprotein P	-	-	+	-	+	+	-	-	-	-
171	P00736	Complement C1r subcomponent	-	-	+	-	+	+	-	-	-	-
172	P60174	Triosephosphate isomerase	-	-	+	-	+	+	-	-	-	-
173	P14151	L-selectin	-	-	+	-	+	+	-	-	-	-
174	P22352	Glutathione peroxidase 3	-	-	+	-	+	+	-	-	-	-
175	Q03591	Complement factor H-related protein 1	-	-	+	-	+	+	-	+	-	-
176	O00391	Sulfhydryl oxidase 1	-	-	+	-	+	+	-	-	-	-
177	P35443	Thrombospondin-4	-	-	+	-	+	+	-	-	-	-
178	Q15848	Adiponectin	-	-	+	-	+	+	-	-	-	-
179	Q04756	Hepatocyte growth factor activator	-	-	+	-	+	+	-	-	-	-
180	P11226	Mannose-binding protein C	-	-	+	-	+	+	-	-	-	-
181	O95497	Pantetheinase	-	-	+	-	+	+	-	+	+	-
182	P24593	Insulin-like growth factor-binding protein 5	-	-	+	-	+	+	-	-	-	-
183	P22891	Vitamin K-dependent protein Z	-	-	+	-	+	+	-	-	-	-
184	P01034	Cystatin-C	-	-	+	-	+	+	-	-	-	-
185	P15151	Poliovirus receptor	-	-	+	-	+	+	-	-	-	-
186	P80108	Phosphatidylinositol-glycan-specific phospholipase D	-	-	+	-	+	+	-	-	-	-
187	Q16270	Insulin-like growth factor-binding protein 7	-	-	+	-	+	+	-	-	-	-
188	O75874	Isocitrate dehydrogenase [NADP] cytoplasmic	-	-	+	-	+	+	-	-	-	-
189	P07237	Protein disulfide-isomerase	-	-	+	-	+	+	-	-	-	-
190	P05160	Coagulation factor XIII B chain	-	-	+	-	+	+	-	-	-	-
191	P06276	Cholinesterase	-	-	+	-	+	+	-	-	-	-
192	P00746	Complement factor D	-	-	+	-	+	+	-	-	-	-
193	P13598	Intercellular adhesion molecule 2	-	-	+	-	+	+	-	-	-	-
194	Q9BW27	Nuclear pore complex protein Nup85	-	-	+	-	-	-	-	-	-	-
195	P06858	Lipoprotein lipase	-	-	+	-	+	+	-	-	-	-
196	P32119	Peroxiredoxin-2	-	-	+	-	+	+	-	-	-	-
197	Q12889	Oviduct-specific glycoprotein	-	-	+	-	+	+	-	-	-	-
198	Q15582	Transforming growth factor-beta-induced protein ig-h3	-	-	+	-	+	+	-	-	-	-
199	O43236	Septin-4	-	-	+	-	-	-	-	-	-	-
200	P19883	Follistatin	-	-	+	-	+	+	-	-	-	-
201	A0A0C4DH25	Immunoglobulin kappa variable 3D-20	-	-	-	+	+	-	-	-	-	-
202	O14791	Apolipoprotein L1	-	-	-	+	+	+	-	+	+	-
203	A0A0J9YX35	Immunoglobulin heavy variable 3-64D	-	-	-	+	+	-	-	+	-	-
204	P04259	Keratin, type II cytoskeletal 6B	-	-	-	+	-	-	-	-	-	-
205	Q8IYK2	Coiled-coil domain-containing protein 105	-	-	-	+	+	-	-	-	-	-
206	Q8N3K9	Cardiomyopathy-associated protein 5	-	-	-	+	-	-	-	-	-	-
207	P01764	Immunoglobulin heavy variable 3-23	-	-	-	-	+	-	-	-	-	-
208	P04003	C4b-binding protein alpha chain	-	-	-	-	+	+	-	-	-	-
209	A0A075B6S5	Immunoglobulin kappa variable 1-27	-	-	-	-	+	-	-	+	+	-
210	P26927	Hepatocyte growth factor-like protein	-	-	-	-	+	+	-	-	-	-
211	P06310	Immunoglobulin kappa variable 2-30	-	-	-	-	+	-	-	+	+	+
212	P06733	Alpha-enolase	-	-	-	-	+	+	-	-	-	-
213	P23142	Fibulin-1	-	-	-	-	+	+	-	-	-	-
214	P60709	Actin, cytoplasmic 1	-	-	-	-	+	+	-	-	-	-
215	P13796	Plastin-2	-	-	-	-	+	+	-	-	-	-
216	P07437	Tubulin beta chain	-	-	-	-	+	+	-	-	-	-
217	P14618	Pyruvate kinase PKM	-	-	-	-	+	+	-	-	-	-
218	P01717	Immunoglobulin lambda variable 3-25	-	-	-	-	+	-	-	-	+	-
219	P01703	Immunoglobulin lambda variable 1-40	-	-	-	-	+	-	-	-	+	-
220	P11597	Cholesteryl ester transfer protein	-	-	-	-	+	+	-	-	-	-
221	A0A075B6R2	Immunoglobulin heavy variable 4-4	-	-	-	-	+	-	-	-	+	-
222	P0DP09	Immunoglobulin kappa variable 1-13	-	-	-	-	+	-	-	-	-	+
223	P68363	Tubulin alpha-1B chain	-	-	-	-	+	-	-	-	-	-
224	O43866	CD5 antigen-like	-	-	-	-	+	+	-	-	+	-
225	P04406	Glyceraldehyde-3-phosphate dehydrogenase	-	-	-	-	+	+	-	-	-	-
226	P12111	Collagen alpha-3(VI) chain	-	-	-	-	+	+	-	-	-	-
227	P35908	Keratin, type II cytoskeletal 2 epidermal	-	-	-	-	+	+	-	+	+	+
228	P01701	Immunoglobulin lambda variable 1-51	-	-	-	-	+	-	-	+	-	-
229	P04180	Phosphatidylcholine-sterol acyltransferase	-	-	-	-	+	+	-	-	-	-
230	P04075	Fructose-bisphosphate aldolase A	-	-	-	-	+	+	-	-	-	-
231	A0A0B4J1V0	Immunoglobulin heavy variable 3-15	-	-	-	-	+	-	-	+	+	-
232	P55058	Phospholipid transfer protein	-	-	-	-	+	+	-	+	-	-
233	P33908	Mannosyl-oligosaccharide 1,2-alpha-mannosidase IA	-	-	-	-	+	+	-	-	-	-
234	P00338	L-lactate dehydrogenase A chain	-	-	-	-	+	+	-	-	-	-
235	A0A0C4DH68	Immunoglobulin kappa variable 2-24	-	-	-	-	+	-	-	+	-	-
236	P16112	Aggrecan core protein	-	-	-	-	+	+	-	-	-	-
237	P05111	Inhibin alpha chain	-	-	-	-	+	+	-	-	-	-
238	P01772	Immunoglobulin heavy variable 3-33	-	-	-	-	+	-	-	-	-	-
239	A0A075B6S2	Immunoglobulin kappa variable 2D-29	-	-	-	-	+	-	-	-	+	-
240	Q9BXR6	Complement factor H-related protein 5	-	-	-	-	+	+	-	-	-	-
241	P62937	Peptidyl-prolyl cis-trans isomerase A	-	-	-	-	+	+	-	-	-	-
242	P00488	Coagulation factor XIII A chain	-	-	-	-	+	+	-	-	-	-
243	P01721	Immunoglobulin lambda variable 6-57	-	-	-	-	+	-	-	-	-	-
244	P02786	Transferrin receptor protein 1	-	-	-	-	+	+	-	-	-	-
245	P12259	Coagulation factor V	-	-	-	-	+	+	-	-	-	-
246	P07602	Prosaposin	-	-	-	-	+	+	-	-	-	-
247	P27918	Properdin	-	-	-	-	+	+	-	-	-	-
248	P01742	Immunoglobulin heavy variable 1-69	-	-	-	-	+	-	-	-	-	-
249	P08238	Heat shock protein HSP 90-beta	-	-	-	-	+	+	-	-	-	-
250	A0A0C4DH38	Immunoglobulin heavy variable 5-51	-	-	-	-	+	-	-	+	+	-
251	P08572	Collagen alpha-2(IV) chain	-	-	-	-	+	+	-	-	-	-
252	P39059	Collagen alpha-1(XV) chain	-	-	-	-	+	+	-	-	-	-
253	P01599	Immunoglobulin kappa variable 1-17	-	-	-	-	+	-	-	-	-	-
254	P11142	Heat shock cognate 71 kDa protein	-	-	-	-	+	+	-	-	-	-
255	Q5VTE0	Putative elongation factor 1-alpha-like 3	-	-	-	-	+	-	-	-	-	-
256	P08709	Coagulation factor VII	-	-	-	-	+	+	-	-	-	-
257	P12955	Xaa-Pro dipeptidase	-	-	-	-	+	+	-	-	-	-
258	P47972	Neuronal pentraxin-2	-	-	-	-	+	+	-	-	-	-
259	O75636	Ficolin-3	-	-	-	-	+	+	-	-	-	-
260	P14625	Endoplasmin	-	-	-	-	+	+	-	-	-	-
261	A0A0A0MT36	Immunoglobulin kappa variable 6D-21	-	-	-	-	+	-	-	-	-	-
262	A0A075B6I1	Immunoglobulin lambda variable 4-60	-	-	-	-	+	-	-	-	-	-
263	Q13822	Ectonucleotide pyrophosphatase/phosphodiesterase family member 2	-	-	-	-	+	+	-	-	-	-
264	P01614	Immunoglobulin kappa variable 2D-40	-	-	-	-	+	-	-	-	-	-
265	P01704	Immunoglobulin lambda variable 2-14	-	-	-	-	+	-	-	-	+	-
266	Q9NQ79	Cartilage acidic protein 1	-	-	-	-	+	+	-	-	-	-
267	P04439	HLA class I histocompatibility antigen, A alpha chain	-	-	-	-	+	+	-	-	-	-
268	P09211	Glutathione S-transferase P	-	-	-	-	+	+	-	-	-	-
269	P09455	Retinol-binding protein 1	-	-	-	-	+	+	-	-	-	-
270	Q16658	Fascin	-	-	-	-	+	+	-	-	-	-
271	P02746	Complement C1q subcomponent subunit B	-	-	-	-	+	+	-	-	-	-
272	P07195	L-lactate dehydrogenase B chain	-	-	-	-	+	+	-	-	-	-
273	Q9UNW1	Multiple inositol polyphosphate phosphatase 1	-	-	-	-	+	+	-	-	-	-
274	P55268	Laminin subunit beta-2	-	-	-	-	+	+	-	-	-	-
275	P08476	Inhibin beta A chain	-	-	-	-	+	+	-	-	-	-
276	P15144	Aminopeptidase N	-	-	-	-	+	+	-	-	-	-
277	P22105	Tenascin-X	-	-	-	-	+	+	-	-	-	-
278	P02745	Complement C1q subcomponent subunit A	-	-	-	-	+	+	-	+	-	-
279	P02747	Complement C1q subcomponent subunit C	-	-	-	-	+	+	-	+	-	-
280	Q15113	Procollagen C-endopeptidase enhancer 1	-	-	-	-	+	+	-	-	-	-
281	Q9UHG3	Prenylcysteine oxidase 1	-	-	-	-	+	+	-	-	-	-
282	P55072	Transitional endoplasmic reticulum ATPase	-	-	-	-	+	+	-	-	-	-
283	P19320	Vascular cell adhesion protein 1	-	-	-	-	+	+	-	-	-	-
284	Q6UXB8	Peptidase inhibitor 16	-	-	-	-	+	+	-	-	-	-
285	P01767	Immunoglobulin heavy variable 3-53	-	-	-	-	+	-	-	-	-	-
286	A0A0C4DH33	Immunoglobulin heavy variable 1-24	-	-	-	-	+	-	-	-	-	-
287	P0DP08	Immunoglobulin heavy variable 4-38-2	-	-	-	-	+	-	-	-	-	-
288	A0A0J9YVY3	Immunoglobulin heavy variable 7-4-1	-	-	-	-	+	-	-	-	-	-
289	P63104	14-3-3 protein zeta/delta	-	-	-	-	+	+	-	-	-	-
290	Q12805	EGF-containing fibulin-like extracellular matrix protein 1	-	-	-	-	+	+	-	-	-	-
291	P0DP01	Immunoglobulin heavy variable 1-8	-	-	-	-	+	-	-	-	-	-
292	A0A0B4J1V6	Immunoglobulin heavy variable 3-73	-	-	-	-	+	-	-	-	-	-
293	P09172	Dopamine beta-hydroxylase	-	-	-	-	+	+	-	-	-	-
294	Q92820	Gamma-glutamyl hydrolase	-	-	-	-	+	+	-	-	-	-
295	Q13790	Apolipoprotein F	-	-	-	-	+	+	-	-	-	-
296	P07737	Profilin-1	-	-	-	-	+	+	-	-	-	-
297	P07996	Thrombospondin-1	-	-	-	-	+	+	-	-	-	-
298	P02462	Collagen alpha-1(IV) chain	-	-	-	-	+	+	-	+	-	-
299	P26038	Moesin	-	-	-	-	+	+	-	-	-	-
300	P48740	Mannan-binding lectin serine protease 1	-	-	-	-	+	+	-	-	-	-
301	P01817	Immunoglobulin heavy variable 2-5	-	-	-	-	+	-	-	+	+	-
302	A0A0B4J1U7	Immunoglobulin heavy variable 6-1	-	-	-	-	+	-	-	-	+	-
303	P33151	Cadherin-5	-	-	-	-	+	+	-	-	-	-
304	P19021	Peptidyl-glycine alpha-amidating monooxygenase	-	-	-	-	+	+	-	-	-	-
305	A0A087WSX0	Immunoglobulin lambda variable 5-45	-	-	-	-	+	-	-	-	-	-
306	P02042	Hemoglobin subunit delta	-	-	-	-	+	-	-	+	-	-
307	P00558	Phosphoglycerate kinase 1	-	-	-	-	+	+	-	-	-	-
308	A0A075B6H9	Immunoglobulin lambda variable 4-69	-	-	-	-	+	-	-	-	-	-
309	Q9UNN8	Endothelial protein C receptor	-	-	-	-	+	+	-	-	-	-
310	P49327	Fatty acid synthase	-	-	-	-	+	-	-	-	-	-
311	Q15392	Delta(24)-sterol reductase	-	-	-	-	+	-	-	-	-	-
312	P41222	Prostaglandin-H2 D-isomerase	-	-	-	-	+	+	-	-	-	-
313	Q8WUA8	Tsukushin	-	-	-	-	+	+	-	-	-	-
314	P08133	Annexin A6	-	-	-	-	+	+	-	-	-	-
315	Q6UX71	Plexin domain-containing protein 2	-	-	-	-	+	+	-	-	-	-
316	A0A075B6S4	Immunoglobulin kappa variable 1D-17	-	-	-	-	+	-	-	-	-	-
317	P06702	Protein S100-A9	-	-	-	-	+	+	+	-	-	-
318	A0A0B4J1U3	Immunoglobulin lambda variable 1-36	-	-	-	-	+	-	-	-	-	-
319	P78539	Sushi repeat-containing protein SRPX	-	-	-	-	+	+	-	-	-	-
320	P01762	Immunoglobulin heavy variable 3-11	-	-	-	-	+	-	-	-	-	-
321	A0A075B6Q5	Immunoglobulin heavy variable 3-64	-	-	-	-	+	-	-	-	-	-
322	P13647	Keratin, type II cytoskeletal 5	-	-	-	-	+	+	-	-	+	-
323	P49747	Cartilage oligomeric matrix protein	-	-	-	-	+	+	-	-	-	-
324	Q9H8L6	Multimerin-2	-	-	-	-	+	+	-	-	-	-
325	P13591	Neural cell adhesion molecule 1	-	-	-	-	+	+	-	-	-	-
326	P04430	Immunoglobulin kappa variable 1-16	-	-	-	-	+	-	-	-	-	-
327	P0DJI8	Serum amyloid A-1 protein	-	-	-	-	+	-	-	-	-	-
328	A0A075B6J9	Immunoglobulin lambda variable 2-18	-	-	-	-	+	-	-	-	-	-
329	P62258	14-3-3 protein epsilon	-	-	-	-	+	+	-	-	-	-
330	Q15063	Periostin	-	-	-	-	+	+	-	-	-	-
331	O14786	Neuropilin-1	-	-	-	-	+	+	-	-	-	-
332	O60664	Perilipin-3	-	-	-	-	+	+	-	-	-	-
333	P26439	3 beta-hydroxysteroid dehydrogenase/Delta 5-->4-isomerase type 2	-	-	-	-	+	-	-	-	-	-
334	A0A0B4J1V2	Immunoglobulin heavy variable 2-26	-	-	-	-	+	-	-	-	+	-
335	P18065	Insulin-like growth factor-binding protein 2	-	-	-	-	+	+	-	-	-	-
336	P01344	Insulin-like growth factor II	-	-	-	-	+	-	-	-	-	-
337	P23083	Immunoglobulin heavy variable 1-2	-	-	-	-	+	-	-	+	-	-
338	O94985	Calsyntenin-1	-	-	-	-	+	+	-	-	-	-
339	P61626	Lysozyme C	-	-	-	-	+	+	-	-	-	-
340	P08195	4F2 cell-surface antigen heavy chain	-	-	-	-	+	+	-	-	-	-
341	P53396	ATP-citrate synthase	-	-	-	-	+	+	-	-	-	-
342	P26641	Elongation factor 1-gamma	-	-	-	-	+	-	-	-	-	-
343	P12109	Collagen alpha-1(VI) chain	-	-	-	-	+	+	-	-	-	-
344	P11047	Laminin subunit gamma-1	-	-	-	-	+	+	-	-	-	-
345	P01705	Immunoglobulin lambda variable 2-23	-	-	-	-	+	-	-	-	-	-
346	P36871	Phosphoglucomutase-1	-	-	-	-	+	+	-	-	-	-
347	Q9NPH3	Interleukin-1 receptor accessory protein	-	-	-	-	+	+	-	-	-	-
348	P22314	Ubiquitin-like modifier-activating enzyme 1	-	-	-	-	+	+	-	-	-	-
349	Q9HDC9	Adipocyte plasma membrane-associated protein	-	-	-	-	+	-	-	-	-	-
350	P13639	Elongation factor 2	-	-	-	-	+	+	-	-	-	-
351	P01699	Immunoglobulin lambda variable 1-44	-	-	-	-	+	-	-	-	-	-
352	P50395	Rab GDP dissociation inhibitor beta	-	-	-	-	+	+	-	-	-	-
353	Q8NBP7	Proprotein convertase subtilisin/kexin type 9	-	-	-	-	+	+	-	-	-	-
354	P11021	Endoplasmic reticulum chaperone BiP	-	-	-	-	+	+	-	-	-	-
355	P01766	Immunoglobulin heavy variable 3-13	-	-	-	-	+	-	-	-	-	-
356	P08758	Annexin A5	-	-	-	-	+	+	-	-	-	-
357	Q8N474	Secreted frizzled-related protein 1	-	-	-	-	+	-	-	-	-	-
358	Q14195	Dihydropyrimidinase-related protein 3	-	-	-	-	+	+	-	-	-	-
359	P01706	Immunoglobulin lambda variable 2-11	-	-	-	-	+	-	-	-	-	-
360	P01601	Immunoglobulin kappa variable 1D-16	-	-	-	-	+	-	-	-	-	-
361	Q86Y38	Xylosyltransferase 1	-	-	-	-	+	+	-	-	-	-
362	Q01459	Di-N-acetylchitobiase	-	-	-	-	+	+	-	-	-	-
363	Q92496	Complement factor H-related protein 4	-	-	-	-	+	-	-	-	-	-
364	P19338	Nucleolin	-	-	-	-	+	+	-	-	-	-
365	Q6P179	Endoplasmic reticulum aminopeptidase 2	-	-	-	-	+	+	-	-	-	-
366	Q6EMK4	Vasorin	-	-	-	-	+	+	-	-	-	-
367	P05362	Intercellular adhesion molecule 1	-	-	-	-	+	+	-	-	-	-
368	P57053	Histone H2B type F-S	-	-	-	-	+	-	-	-	-	-
369	Q9H361	Polyadenylate-binding protein 3	-	-	-	-	+	+	-	-	-	-
370	P29401	Transketolase	-	-	-	-	+	+	-	-	-	-
371	P09529	Inhibin beta B chain	-	-	-	-	+	+	-	-	-	-
372	P78417	Glutathione S-transferase omega-1	-	-	-	-	+	+	-	-	-	-
373	P60660	Myosin light polypeptide 6	-	-	-	-	+	+	-	-	-	-
374	A0A0B4J1Y8	Immunoglobulin lambda variable 9-49	-	-	-	-	+	-	-	-	-	-
375	A0A087WSZ0	Immunoglobulin kappa variable 1D-8	-	-	-	-	+	-	-	-	-	-
376	A0A0C4DH29	Immunoglobulin heavy variable 1-3	-	-	-	-	+	-	-	+	-	-
377	P69892	Hemoglobin subunit gamma-2	-	-	-	-	+	-	-	-	-	-
378	A0A0A0MS14	Immunoglobulin heavy variable 1-45	-	-	-	-	+	-	-	-	-	-
379	Q15323	Keratin, type I cuticular Ha1	-	-	-	-	+	-	-	-	-	-
380	P25391	Laminin subunit alpha-1	-	-	-	-	+	+	-	-	-	-
381	Q76LX8	A disintegrin and metalloproteinase with thrombospondin motifs 13	-	-	-	-	+	+	-	-	-	-
382	P36578	60S ribosomal protein L4	-	-	-	-	+	+	-	-	-	-
383	P0DMR1	Heterogeneous nuclear ribonucleoprotein C-like 4	-	-	-	-	+	-	-	-	-	-
384	Q14697	Neutral alpha-glucosidase AB	-	-	-	-	+	+	-	-	-	-
385	Q16394	Exostosin-1	-	-	-	-	+	+	-	-	-	-
386	P23528	Cofilin-1	-	-	-	-	+	+	-	-	-	-
387	Q13228	Methanethiol oxidase	-	-	-	-	+	+	-	-	-	-
388	P27797	Calreticulin	-	-	-	-	+	+	-	-	-	-
389	P05387	60S acidic ribosomal protein P2	-	-	-	-	+	+	-	-	-	-
390	P08865	40S ribosomal protein SA	-	-	-	-	+	+	-	-	-	-
391	P08294	Extracellular superoxide dismutase [Cu-Zn]	-	-	-	-	+	+	-	-	-	-
392	Q99497	Protein/nucleic acid deglycase DJ-1	-	-	-	-	+	+	-	-	-	-
393	P01814	Immunoglobulin heavy variable 2-70	-	-	-	-	+	-	-	+	+	-
394	P34096	Ribonuclease 4	-	-	-	-	+	+	-	-	-	-
395	P31949	Protein S100-A11	-	-	-	-	+	+	-	-	-	-
396	P59666	Neutrophil defensin 3	-	-	-	-	+	+	-	-	-	-
397	Q9BUN1	Protein MENT	-	-	-	-	+	-	-	-	-	-
398	P00390	Glutathione reductase, mitochondrial	-	-	-	-	+	+	-	-	-	-
399	Q99969	Retinoic acid receptor responder protein 2	-	-	-	-	+	+	-	-	-	-
400	P98066	Tumor necrosis factor-inducible gene 6 protein	-	-	-	-	+	+	-	-	-	-
401	Q5SZK8	FRAS1-related extracellular matrix protein 2	-	-	-	-	+	+	-	-	-	-
402	P14174	Macrophage migration inhibitory factor	-	-	-	-	+	+	-	-	-	-
403	Q15233	Non-POU domain-containing octamer-binding protein	-	-	-	-	+	+	-	-	-	-
404	P08253	72 kDa type IV collagenase	-	-	-	-	+	+	-	-	-	-
405	P07585	Decorin	-	-	-	-	+	+	-	-	-	-
406	Q9Y5Y7	Lymphatic vessel endothelial hyaluronic acid receptor 1	-	-	-	-	+	+	-	-	-	-
407	Q99878	Histone H2A type 1-J	-	-	-	-	+	-	-	-	-	-
408	P30101	Protein disulfide-isomerase A3	-	-	-	-	+	+	-	-	-	-
409	Q86U17	Serpin A11	-	-	-	-	+	+	-	-	-	-
410	P13727	Bone marrow proteoglycan	-	-	-	-	+	+	-	-	-	-
411	P83110	Serine protease HTRA3	-	-	-	-	+	+	-	-	-	-
412	Q15485	Ficolin-2	-	-	-	-	+	-	-	-	-	-
413	P62805	Histone H4	-	-	-	-	+	+	-	-	-	-
414	P13473	Lysosome-associated membrane glycoprotein 2	-	-	-	-	+	+	-	-	-	-
415	Q02818	Nucleobindin-1	-	-	-	-	+	+	-	-	-	-
416	O95479	GDH/6PGL endoplasmic bifunctional protein	-	-	-	-	+	+	-	-	-	-
417	P15291	Beta-1,4-galactosyltransferase 1	-	-	-	-	+	+	-	-	-	-
418	Q13103	Secreted phosphoprotein 24	-	-	-	-	+	+	-	-	-	-
419	P30041	Peroxiredoxin-6	-	-	-	-	+	+	-	-	-	-
420	Q14515	SPARC-like protein 1	-	-	-	-	+	+	-	-	-	-
421	P23284	Peptidyl-prolyl cis-trans isomerase B	-	-	-	-	+	+	-	-	-	-
422	A0A0B4J1X5	Immunoglobulin heavy variable 3-74	-	-	-	-	+	-	-	-	-	-
423	P27487	Dipeptidyl peptidase 4	-	-	-	-	+	+	-	-	-	-
424	Q06830	Peroxiredoxin-1	-	-	-	-	+	+	-	-	-	-
425	P02533	Keratin, type I cytoskeletal 14	-	-	-	-	+	+	-	+	-	-
426	P54108	Cysteine-rich secretory protein 3	-	-	-	-	+	+	-	-	+	-
427	P03950	Angiogenin	-	-	-	-	+	+	-	-	-	-
428	P11413	Glucose-6-phosphate 1-dehydrogenase	-	-	-	-	+	+	-	-	-	-
429	P14324	Farnesyl pyrophosphate synthase	-	-	-	-	+	+	-	-	-	-
430	P04040	Catalase	-	-	-	-	+	+	-	-	-	-
431	P39060	Collagen alpha-1(XVIII) chain	-	-	-	-	+	+	-	-	-	-
432	Q10588	ADP-ribosyl cyclase/cyclic ADP-ribose hydrolase 2	-	-	-	-	+	+	-	-	-	-
433	P31431	Syndecan-4	-	-	-	-	+	+	-	-	-	-
434	P68371	Tubulin beta-4B chain	-	-	-	-	+	+	-	-	-	-
435	P20851	C4b-binding protein beta chain	-	-	-	-	+	-	-	-	-	-
436	P48506	Glutamate--cysteine ligase catalytic subunit	-	-	-	-	+	+	-	-	-	-
437	P0DP25	Calmodulin-3	-	-	-	-	+	+	-	-	-	-
438	Q6YHK3	CD109 antigen	-	-	-	-	+	+	-	-	-	-
439	Q02790	Peptidyl-prolyl cis-trans isomerase FKBP4	-	-	-	-	+	+	-	-	-	-
440	Q12905	Interleukin enhancer-binding factor 2	-	-	-	-	+	+	-	-	-	-
441	A0A0B4J1X8	Immunoglobulin heavy variable 3-43	-	-	-	-	+	-	-	-	-	-
442	P51665	26S proteasome non-ATPase regulatory subunit 7	-	-	-	-	+	+	-	-	-	-
443	P06331	Immunoglobulin heavy variable 4-34	-	-	-	-	+	-	-	+	+	-
444	P08637	Low affinity immunoglobulin gamma Fc region receptor III-A	-	-	-	-	+	+	-	-	-	-
445	Q12860	Contactin-1	-	-	-	-	+	+	-	-	-	-
446	A0A075B6K4	Immunoglobulin lambda variable 3-10	-	-	-	-	+	-	-	-	-	-
447	P16070	CD44 antigen	-	-	-	-	+	+	-	-	-	-
448	P18669	Phosphoglycerate mutase 1	-	-	-	-	+	+	-	-	-	-
449	P22676	Calretinin	-	-	-	-	+	+	-	-	-	-
450	P07998	Ribonuclease pancreatic	-	-	-	-	+	+	-	-	-	-
451	O14727	Apoptotic protease-activating factor 1	-	-	-	-	+	-	-	-	-	-
452	A0M8Q6	Immunoglobulin lambda constant 7	-	-	-	-	+	-	-	-	-	-
453	Q9HCB6	Spondin-1	-	-	-	-	+	+	-	-	-	-
454	P06744	Glucose-6-phosphate isomerase	-	-	-	-	+	+	-	-	-	-
455	P10721	Mast/stem cell growth factor receptor Kit	-	-	-	-	+	+	-	-	-	-
456	P14061	Estradiol 17-beta-dehydrogenase 1	-	-	-	-	+	+	-	-	-	-
457	Q86UD1	Out at first protein homolog	-	-	-	-	+	+	-	-	-	-
458	A0A0B4J1V1	Immunoglobulin heavy variable 3-21	-	-	-	-	+	-	-	-	-	-
459	P15814	Immunoglobulin lambda-like polypeptide 1	-	-	-	-	+	-	-	-	-	-
460	P07942	Laminin subunit beta-1	-	-	-	-	+	+	-	-	-	-
461	P40227	T-complex protein 1 subunit zeta	-	-	-	-	+	-	-	-	-	-
462	P61978	Heterogeneous nuclear ribonucleoprotein K	-	-	-	-	+	+	-	-	-	-
463	P17174	Aspartate aminotransferase, cytoplasmic	-	-	-	-	+	+	-	-	-	-
464	Q14103	Heterogeneous nuclear ribonucleoprotein D0	-	-	-	-	+	+	-	-	-	-
465	Q13361	Microfibrillar-associated protein 5	-	-	-	-	+	+	-	-	-	-
466	P01763	Immunoglobulin heavy variable 3-48	-	-	-	-	+	-	-	-	-	-
467	A0A0C4DH67	Immunoglobulin kappa variable 1-8	-	-	-	-	+	-	-	-	-	-
468	A0A0B4J2H0	Immunoglobulin heavy variable 1-69D	-	-	-	-	+	-	-	-	-	-
469	A0A0C4DH24	Immunoglobulin kappa variable 6-21	-	-	-	-	+	-	-	-	-	-
470	P01889	HLA class I histocompatibility antigen, B alpha chain	-	-	-	-	+	+	-	+	-	-
471	P69891	Hemoglobin subunit gamma-1	-	-	-	-	+	-	-	-	-	-
472	P0DJI9	Serum amyloid A-2 protein	-	-	-	-	+	-	-	-	-	-
473	P31946	14-3-3 protein beta/alpha	-	-	-	-	+	+	-	-	-	-
474	P61981	14-3-3 protein gamma	-	-	-	-	+	+	-	-	-	-
475	Q04695	Keratin, type I cytoskeletal 17	-	-	-	-	+	+	-	-	-	-
476	Q02224	Centromere-associated protein E	-	-	-	-	+	-	-	-	-	-
477	E9PAV3	Nascent polypeptide-associated complex subunit alpha, muscle-specific form	-	-	-	-	+	+	-	-	-	-
478	Q5THK1	Protein PRR14L	-	-	-	-	+	-	-	-	-	-
479	P46940	Ras GTPase-activating-like protein IQGAP1	-	-	-	-	+	+	-	-	-	-
480	Q92954	Proteoglycan 4	-	-	-	-	+	+	-	-	-	-
481	Q8N283	Ankyrin repeat domain-containing protein 35	-	-	-	-	+	+	-	-	-	-
482	P18206	Vinculin	-	-	-	-	+	+	-	-	-	-
483	P23470	Receptor-type tyrosine-protein phosphatase gamma	-	-	-	-	+	+	-	-	-	-
484	Q8NDV3	Structural maintenance of chromosomes protein 1B	-	-	-	-	+	-	-	-	-	-
485	O75339	Cartilage intermediate layer protein 1	-	-	-	-	+	+	-	-	-	-
486	P49588	Alanine--tRNA ligase, cytoplasmic	-	-	-	-	+	+	-	-	-	-
487	P04275	von Willebrand factor	-	-	-	-	+	+	-	-	-	-
488	Q86VP6	Cullin-associated NEDD8-dissociated protein 1	-	-	-	-	+	+	-	-	-	-
489	H7BZ55	Putative ciliary rootlet coiled-coil protein 2	-	-	-	-	+	-	-	-	-	-
490	O00533	Neural cell adhesion molecule L1-like protein	-	-	-	-	+	+	-	-	-	-
491	P30153	Serine/threonine-protein phosphatase 2A 65 kDa regulatory subunit A alpha isoform	-	-	-	-	+	-	-	-	-	-
492	O95428	Papilin	-	-	-	-	+	-	-	-	-	-
493	P10809	60 kDa heat shock protein, mitochondrial	-	-	-	-	+	-	-	-	-	-
494	Q9BZ29	Dedicator of cytokinesis protein 9	-	-	-	-	+	-	-	-	-	-
495	Q8IWY4	Signal peptide, CUB and EGF-like domain-containing protein 1	-	-	-	-	+	+	-	-	-	-
496	Q02809	Procollagen-lysine,2-oxoglutarate 5-dioxygenase 1	-	-	-	-	+	+	-	-	-	-
497	O43390	Heterogeneous nuclear ribonucleoprotein R	-	-	-	-	+	+	-	-	-	-
498	Q6UY14	ADAMTS-like protein 4	-	-	-	-	+	+	-	-	-	-
499	O60506	Heterogeneous nuclear ribonucleoprotein Q	-	-	-	-	+	+	-	-	-	-
500	P50454	Serpin H1	-	-	-	-	+	+	-	-	-	-
501	P05067	Amyloid-beta precursor protein	-	-	-	-	+	+	-	-	-	-
502	P54802	Alpha-N-acetylglucosaminidase	-	-	-	-	+	+	-	-	-	-
503	P50990	T-complex protein 1 subunit theta	-	-	-	-	+	+	-	-	-	-
504	P01130	Low-density lipoprotein receptor	-	-	-	-	+	+	-	-	-	-
505	P19022	Cadherin-2	-	-	-	-	+	+	-	-	-	-
506	O95340	Bifunctional 3'-phosphoadenosine 5'-phosphosulfate synthase 2	-	-	-	-	+	+	-	-	-	-
507	Q99832	T-complex protein 1 subunit eta	-	-	-	-	+	-	-	-	-	-
508	Q93063	Exostosin-2	-	-	-	-	+	+	-	-	-	-
509	P63162	Small nuclear ribonucleoprotein-associated protein N	-	-	-	-	+	+	-	-	-	-
510	P38606	V-type proton ATPase catalytic subunit A	-	-	-	-	+	+	-	-	-	-
511	Q96E39	RNA binding motif protein, X-linked-like-1	-	-	-	-	+	-	-	-	-	-
512	Q8WY36	HMG box transcription factor BBX	-	-	-	-	+	-	-	-	-	-
513	Q8IZ52	Chondroitin sulfate synthase 2	-	-	-	-	+	+	-	-	-	-
514	P52209	6-phosphogluconate dehydrogenase, decarboxylating	-	-	-	-	+	+	-	-	-	-
515	Q69YZ2	Transmembrane protein 200B	-	-	-	-	+	-	-	-	-	-
516	P12277	Creatine kinase B-type	-	-	-	-	+	+	-	-	-	-
517	O75023	Leukocyte immunoglobulin-like receptor subfamily B member 5	-	-	-	-	+	+	-	-	-	-
518	Q6E0U4	Dermokine	-	-	-	-	+	-	-	-	-	-
519	Q13838	Spliceosome RNA helicase DDX39B	-	-	-	-	+	+	-	-	-	-
520	P07359	Platelet glycoprotein Ib alpha chain	-	-	-	-	+	+	-	-	-	-
521	Q99536	Synaptic vesicle membrane protein VAT-1 homolog	-	-	-	-	+	+	-	-	-	-
522	Q96AG4	Leucine-rich repeat-containing protein 59	-	-	-	-	+	+	-	-	-	-
523	Q15365	Poly(rC)-binding protein 1	-	-	-	-	+	+	-	-	-	-
524	P07355	Annexin A2	-	-	-	-	+	+	-	-	-	-
525	Q9BRK5	45 kDa calcium-binding protein	-	-	-	-	+	+	-	-	-	-
526	Q92743	Serine protease HTRA1	-	-	-	-	+	+	-	-	-	-
527	Q15366	Poly(rC)-binding protein 2	-	-	-	-	+	+	-	-	-	-
528	P10912	Growth hormone receptor	-	-	-	-	+	+	-	-	-	-
529	P00491	Purine nucleoside phosphorylase	-	-	-	-	+	+	-	-	-	-
530	O00299	Chloride intracellular channel protein 1	-	-	-	-	+	+	-	-	-	-
531	Q9H3U7	SPARC-related modular calcium-binding protein 2	-	-	-	-	+	+	-	-	-	-
532	Q93070	Ecto-ADP-ribosyltransferase 4	-	-	-	-	+	+	-	-	-	-
533	P61158	Actin-related protein 3	-	-	-	-	+	-	-	-	-	-
534	P43487	Ran-specific GTPase-activating protein	-	-	-	-	+	+	-	-	-	-
535	O60687	Sushi repeat-containing protein SRPX2	-	-	-	-	+	+	-	-	-	-
536	P43121	Cell surface glycoprotein MUC18	-	-	-	-	+	+	-	-	-	-
537	P09917	Arachidonate 5-lipoxygenase	-	-	-	-	+	-	-	-	-	-
538	Q9UJJ9	N-acetylglucosamine-1-phosphotransferase subunit gamma	-	-	-	-	+	+	-	-	-	-
539	Q9BVK6	Transmembrane emp24 domain-containing protein 9	-	-	-	-	+	-	-	-	-	-
540	Q92520	Protein FAM3C	-	-	-	-	+	+	-	-	-	-
541	P37802	Transgelin-2	-	-	-	-	+	+	-	-	-	-
542	Q9HA72	Calcium homeostasis modulator protein 2	-	-	-	-	+	-	-	-	-	-
543	Q96EE4	Coiled-coil domain-containing protein 126	-	-	-	-	+	-	-	-	-	-
544	P15514	Amphiregulin	-	-	-	-	+	+	-	-	-	-
545	P00441	Superoxide dismutase [Cu-Zn]	-	-	-	-	+	+	-	-	-	-
546	Q96FQ6	Protein S100-A16	-	-	-	-	+	+	-	-	-	-
547	P46778	60S ribosomal protein L21	-	-	-	-	+	+	-	-	-	-
548	P02794	Ferritin heavy chain	-	-	-	-	+	-	-	-	-	-
549	P02144	Myoglobin	-	-	-	-	+	+	-	-	-	-
550	Q9UKZ9	Procollagen C-endopeptidase enhancer 2	-	-	-	-	+	-	-	-	-	-
551	Q9H0W9	Ester hydrolase C11orf54	-	-	-	-	+	+	-	-	-	-
552	Q15102	Platelet-activating factor acetylhydrolase IB subunit gamma	-	-	-	-	+	+	-	-	-	-
553	P46782	40S ribosomal protein S5	-	-	-	-	+	-	-	-	-	-
554	P20774	Mimecan	-	-	-	-	+	+	-	-	-	-
555	P00492	Hypoxanthine-guanine phosphoribosyltransferase	-	-	-	-	+	+	-	-	-	-
556	O95336	6-phosphogluconolactonase	-	-	-	-	+	+	-	-	-	-
557	Q9UBX5	Fibulin-5	-	-	-	-	+	-	-	-	-	-
558	Q14376	UDP-glucose 4-epimerase	-	-	-	-	+	-	-	-	-	-
559	P62826	GTP-binding nuclear protein Ran	-	-	-	-	+	+	-	-	-	-
560	P24592	Insulin-like growth factor-binding protein 6	-	-	-	-	+	+	-	-	-	-
561	P11279	Lysosome-associated membrane glycoprotein 1	-	-	-	-	+	+	-	-	-	-
562	P07339	Cathepsin D	-	-	-	-	+	+	-	-	-	-
563	O95084	Serine protease 23	-	-	-	-	+	+	-	-	-	-
564	Q15813	Tubulin-specific chaperone E	-	-	-	-	+	-	-	-	-	-
565	P14209	CD99 antigen	-	-	-	-	+	-	-	-	-	-
566	P05019	Insulin-like growth factor I	-	-	-	-	+	+	-	-	-	-
567	P61224	Ras-related protein Rap-1b	-	-	-	-	+	-	-	-	-	-
568	P10720	Platelet factor 4 variant	-	-	-	-	+	+	-	-	-	-
569	P05413	Fatty acid-binding protein, heart	-	-	-	-	+	+	-	-	-	-
570	O75144	ICOS ligand	-	-	-	-	+	+	-	-	-	-
571	P52565	Rho GDP-dissociation inhibitor 1	-	-	-	-	+	+	-	-	-	-
572	P49773	Histidine triad nucleotide-binding protein 1	-	-	-	-	+	-	-	-	-	-
573	P10599	Thioredoxin	-	-	-	-	+	+	-	-	-	-
574	Q6ZQY2	Leucine-rich repeat-containing protein 74B	-	-	-	-	+	-	-	-	-	-
575	P10124	Serglycin	-	-	-	-	+	+	-	-	-	-
576	P62857	40S ribosomal protein S28	-	-	-	-	+	+	-	-	-	-
577	P02775	Platelet basic protein	-	-	-	-	+	+	-	-	-	-
578	P60985	Keratinocyte differentiation-associated protein	-	-	-	-	+	-	-	-	-	-
579	P41159	Leptin	-	-	-	-	+	+	-	-	-	-
580	Q9NTK5	Obg-like ATPase 1	-	-	-	-	+	+	-	-	-	-
581	Q9UQ80	Proliferation-associated protein 2G4	-	-	-	-	+	+	-	-	-	-
582	O43488	Aflatoxin B1 aldehyde reductase member 2	-	-	-	-	+	-	-	-	-	-
583	Q9UBQ6	Exostosin-like 2	-	-	-	-	+	+	-	-	-	-
584	Q12913	Receptor-type tyrosine-protein phosphatase eta	-	-	-	-	+	+	-	-	-	-
585	O43852	Calumenin	-	-	-	-	+	+	-	-	-	-
586	Q7Z7G1	Cytokine-dependent hematopoietic cell linker	-	-	-	-	+	-	-	-	-	-
587	P40189	Interleukin-6 receptor subunit beta	-	-	-	-	+	+	-	-	-	-
588	P22626	Heterogeneous nuclear ribonucleoproteins A2/B1	-	-	-	-	+	+	-	-	-	-
589	P32969	60S ribosomal protein L9	-	-	-	-	+	-	-	-	-	-
590	Q16769	Glutaminyl-peptide cyclotransferase	-	-	-	-	+	-	-	-	-	-
591	P24158	Myeloblastin	-	-	-	-	+	-	-	-	-	-
592	P35555	Fibrillin-1	-	-	-	-	+	+	-	-	-	-
593	Q9UBP4	Dickkopf-related protein 3	-	-	-	-	+	+	-	-	-	-
594	O60704	Protein-tyrosine sulfotransferase 2	-	-	-	-	+	-	-	-	-	-
595	P01709	Immunoglobulin lambda variable 2-8	-	-	-	-	+	-	-	-	-	-
596	P35579	Myosin-9	-	-	-	-	+	+	-	-	-	-
597	Q03001	Dystonin	-	-	-	-	+	-	-	-	-	-
598	Q6UXH8	Collagen and calcium-binding EGF domain-containing protein 1	-	-	-	-	+	+	-	-	-	-
599	P05204	Non-histone chromosomal protein HMG-17	-	-	-	-	+	-	-	-	-	-
600	Q9UBR1	Beta-ureidopropionase	-	-	-	-	+	-	-	-	-	-
601	P05121	Plasminogen activator inhibitor 1	-	-	-	-	+	+	-	-	-	-
602	P36222	Chitinase-3-like protein 1	-	-	-	-	+	+	-	-	-	-
603	P07949	Proto-oncogene tyrosine-protein kinase receptor Ret	-	-	-	-	+	-	-	-	-	-
604	P58166	Inhibin beta E chain	-	-	-	-	+	-	-	-	-	-
605	Q86UN3	Reticulon-4 receptor-like 2	-	-	-	-	+	-	-	-	-	-
606	Q6P0N0	Mis18-binding protein 1	-	-	-	-	+	-	-	-	-	-
607	O75015	Low affinity immunoglobulin gamma Fc region receptor III-B	-	-	-	-	+	-	-	-	-	-
608	A6NC57	Ankyrin repeat domain-containing protein 62	-	-	-	-	+	+	-	-	-	-
609	Q9Y624	Junctional adhesion molecule A	-	-	-	-	+	-	-	-	-	-
610	Q9Y4L1	Hypoxia up-regulated protein 1	-	-	-	-	+	+	-	-	-	-
611	P10646	Tissue factor pathway inhibitor	-	-	-	-	+	+	-	-	-	-
612	P09651	Heterogeneous nuclear ribonucleoprotein A1	-	-	-	-	+	+	-	-	-	-
613	P16435	NADPH--cytochrome P450 reductase	-	-	-	-	+	-	-	-	-	-
614	O60641	Clathrin coat assembly protein AP180	-	-	-	-	+	-	-	-	-	-
615	Q9ULE4	Protein FAM184B	-	-	-	-	+	-	-	-	-	-
616	Q6UWH4	Golgi-associated kinase 1B	-	-	-	-	+	+	-	-	-	-
617	O15467	C-C motif chemokine 16	-	-	-	-	+	+	-	-	-	-
618	O75369	Filamin-B	-	-	-	-	+	+	-	-	-	-
619	Q9H0A0	RNA cytidine acetyltransferase	-	-	-	-	+	-	-	-	-	-
620	Q92688	Acidic leucine-rich nuclear phosphoprotein 32 family member B	-	-	-	-	+	+	-	-	-	-
621	P35609	Alpha-actinin-2	-	-	-	-	+	-	-	-	-	-
622	P81605	Dermcidin	-	-	-	-	+	+	-	-	-	-
623	Q7Z7M0	Multiple epidermal growth factor-like domains protein 8	-	-	-	-	+	+	-	-	-	-
624	A8MPP1	Putative ATP-dependent RNA helicase DDX11-like protein 8	-	-	-	-	+	-	-	-	-	-
625	P04792	Heat shock protein beta-1	-	-	-	-	+	+	-	-	-	-
626	Q14126	Desmoglein-2	-	-	-	-	+	+	-	-	-	-
627	P16402	Histone H1.3	-	-	-	-	+	-	-	-	-	-
628	Q13907	Isopentenyl-diphosphate Delta-isomerase 1	-	-	-	-	+	+	-	-	-	-
629	Q12841	Follistatin-related protein 1	-	-	-	-	+	+	-	-	-	-
630	Q9Y266	Nuclear migration protein nudC	-	-	-	-	+	+	-	-	-	-
631	Q16695	Histone H3.1t	-	-	-	-	+	-	-	-	-	-
632	P24043	Laminin subunit alpha-2	-	-	-	-	+	+	-	-	-	-
633	Q9Y4C2	TRPM8 channel-associated factor 1	-	-	-	-	+	+	-	-	-	-
634	Q9Y2E4	Disco-interacting protein 2 homolog C	-	-	-	-	+	-	-	-	-	-
635	Q8N0Z3	Spindle and centriole-associated protein 1	-	-	-	-	+	+	-	-	-	-
636	P53634	Dipeptidyl peptidase 1	-	-	-	-	+	+	-	-	-	-
637	P07951	Tropomyosin beta chain	-	-	-	-	+	-	-	-	-	-
638	P39019	40S ribosomal protein S19	-	-	-	-	+	-	-	-	-	-
639	O95980	Reversion-inducing cysteine-rich protein with Kazal motifs	-	-	-	-	+	+	-	-	-	-
640	P25398	40S ribosomal protein S12	-	-	-	-	+	-	-	-	-	-
641	P78386	Keratin, type II cuticular Hb5	-	-	-	-	+	-	-	-	-	-
642	P68402	Platelet-activating factor acetylhydrolase IB subunit beta	-	-	-	-	+	+	-	-	-	-
643	P02461	Collagen alpha-1(III) chain	-	-	-	-	+	+	-	-	-	-
644	P08670	Vimentin	-	-	-	-	+	+	-	-	-	-
645	Q9Y646	Carboxypeptidase Q	-	-	-	-	+	+	-	-	-	-
646	Q13190	Syntaxin-5	-	-	-	-	+	-	-	-	-	-
647	P16035	Metalloproteinase inhibitor 2	-	-	-	-	+	+	-	-	-	-
648	P07858	Cathepsin B	-	-	-	-	+	+	-	-	-	-
649	Q9H799	Ciliogenesis and planar polarity effector 1	-	-	-	-	+	-	-	-	-	-
650	P24387	Corticotropin-releasing factor-binding protein	-	-	-	-	+	+	-	-	-	-
651	P08123	Collagen alpha-2(I) chain	-	-	-	-	+	+	-	-	-	-
652	Q99996	A-kinase anchor protein 9	-	-	-	-	+	-	-	-	-	-
653	O75083	WD repeat-containing protein 1	-	-	-	-	+	+	-	-	-	-
654	Q9ULD2	Microtubule-associated tumor suppressor 1	-	-	-	-	+	-	-	-	-	-
655	Q03167	Transforming growth factor beta receptor type 3	-	-	-	-	+	+	-	-	-	-
656	P49913	Cathelicidin antimicrobial peptide	-	-	-	-	+	-	-	-	-	-
657	Q7Z6Z7	E3 ubiquitin-protein ligase HUWE1	-	-	-	-	+	+	-	-	-	-
658	A0A0C4DH34	Immunoglobulin heavy variable 4-28	-	-	-	-	+	-	-	+	-	-
659	O43240	Kallikrein-10	-	-	-	-	+	-	-	-	-	-
660	O96017	Serine/threonine-protein kinase Chk2	-	-	-	-	+	-	-	-	-	-
661	Q2VIR3	Eukaryotic translation initiation factor 2 subunit 3B	-	-	-	-	+	+	-	-	-	-
662	P31150	Rab GDP dissociation inhibitor alpha	-	-	-	-	+	+	-	-	-	-
663	Q02878	60S ribosomal protein L6	-	-	-	-	+	-	-	-	-	-
664	Q9NRC8	NAD-dependent protein deacetylase sirtuin-7	-	-	-	-	+	-	-	-	-	-
665	Q9NYF0	Dapper homolog 1	-	-	-	-	+	-	-	-	-	-
666	P00918	Carbonic anhydrase 2	-	-	-	-	+	+	-	-	-	-
667	Q02040	A-kinase anchor protein 17A	-	-	-	-	+	-	-	-	-	-
668	Q5HY92	Fidgetin	-	-	-	-	+	-	-	-	-	-
669	Q96S96	Phosphatidylethanolamine-binding protein 4	-	-	-	-	+	+	-	-	-	-
670	P11511	Aromatase	-	-	-	-	+	-	-	-	-	-
671	Q9BRD0	BUD13 homolog	-	-	-	-	+	-	-	-	-	-
672	P00966	Argininosuccinate synthase	-	-	-	-	+	+	-	-	-	-
673	P61586	Transforming protein RhoA	-	-	-	-	+	-	-	-	-	-
674	O00231	26S proteasome non-ATPase regulatory subunit 11	-	-	-	-	+	-	-	-	-	-
675	O75069	Transmembrane and coiled-coil domains protein 2	-	-	-	-	+	-	-	-	-	-
676	Q8IZQ8	Myocardin	-	-	-	-	+	-	-	-	-	-
677	Q96L21	60S ribosomal protein L10-like	-	-	-	-	+	-	-	-	-	-
678	Q71U36	Tubulin alpha-1A chain	-	-	-	-	-	+	-	-	-	-
679	P02788	Lactotransferrin	-	-	-	-	-	+	-	-	-	-
680	Q13740	CD166 antigen	-	-	-	-	-	+	-	-	-	-
681	P07900	Heat shock protein HSP 90-alpha	-	-	-	-	-	+	-	-	-	-
682	P54289	Voltage-dependent calcium channel subunit alpha-2/delta-1	-	-	-	-	-	+	-	-	-	-
683	P40925	Malate dehydrogenase, cytoplasmic	-	-	-	-	-	+	-	-	-	-
684	Q16706	Alpha-mannosidase 2	-	-	-	-	-	+	-	-	-	-
685	P68104	Elongation factor 1-alpha 1	-	-	-	-	-	+	-	-	-	-
686	P55290	Cadherin-13	-	-	-	-	-	+	-	-	-	-
687	P35241	Radixin	-	-	-	-	-	+	-	-	-	-
688	P02452	Collagen alpha-1(I) chain	-	-	-	-	-	+	-	-	-	-
689	P12830	Cadherin-1	-	-	-	-	-	+	-	-	-	-
690	P22692	Insulin-like growth factor-binding protein 4	-	-	-	-	-	+	-	-	-	-
691	P35052	Glypican-1	-	-	-	-	-	+	-	-	-	-
692	Q01581	Hydroxymethylglutaryl-CoA synthase, cytoplasmic	-	-	-	-	-	+	-	-	-	-
693	Q16853	Membrane primary amine oxidase	-	-	-	-	-	+	-	-	-	-
694	Q15084	Protein disulfide-isomerase A6	-	-	-	-	-	+	-	-	-	-
695	P09936	Ubiquitin carboxyl-terminal hydrolase isozyme L1	-	-	-	-	-	+	-	-	-	-
696	P07333	Macrophage colony-stimulating factor 1 receptor	-	-	-	-	-	+	-	-	-	-
697	P05062	Fructose-bisphosphate aldolase B	-	-	-	-	-	+	-	-	-	-
698	Q8IXL6	Extracellular serine/threonine protein kinase FAM20C	-	-	-	-	-	+	-	-	-	-
699	P13667	Protein disulfide-isomerase A4	-	-	-	-	-	+	-	-	-	-
700	P26022	Pentraxin-related protein PTX3	-	-	-	-	-	+	-	-	-	-
701	Q16881	Thioredoxin reductase 1, cytoplasmic	-	-	-	-	-	+	-	-	-	-
702	P48668	Keratin, type II cytoskeletal 6C	-	-	-	-	-	+	-	-	-	-
703	P15531	Nucleoside diphosphate kinase A	-	-	-	-	-	+	-	-	-	-
704	Q96SM3	Probable carboxypeptidase X1	-	-	-	-	-	+	-	-	-	-
705	Q14118	Dystroglycan	-	-	-	-	-	+	-	-	-	-
706	P30086	Phosphatidylethanolamine-binding protein 1	-	-	-	-	-	+	-	-	-	-
707	Q01105	Protein SET	-	-	-	-	-	+	-	-	-	-
708	Q86VB7	Scavenger receptor cysteine-rich type 1 protein M130	-	-	-	-	-	+	-	-	-	-
709	P12814	Alpha-actinin-1	-	-	-	-	-	+	-	-	-	-
710	P07910	Heterogeneous nuclear ribonucleoproteins C1/C2	-	-	-	-	-	+	-	-	-	-
711	P05997	Collagen alpha-2(V) chain	-	-	-	-	-	+	-	-	-	-
712	P48637	Glutathione synthetase	-	-	-	-	-	+	-	-	-	-
713	P30043	Flavin reductase (NADPH)	-	-	-	-	-	+	-	-	-	-
714	Q01518	Adenylyl cyclase-associated protein 1	-	-	-	-	-	+	-	-	-	-
715	P67936	Tropomyosin alpha-4 chain	-	-	-	-	-	+	-	-	-	-
716	P16930	Fumarylacetoacetase	-	-	-	-	-	+	-	-	-	-
717	Q8N6C8	Leukocyte immunoglobulin-like receptor subfamily A member 3	-	-	-	-	-	+	-	-	-	-
718	P24821	Tenascin	-	-	-	-	-	+	-	-	-	-
719	Q9BTY2	Plasma alpha-L-fucosidase	-	-	-	-	-	+	-	-	-	-
720	P0DMV9	Heat shock 70 kDa protein 1B	-	-	-	-	-	+	-	-	-	-
721	Q99784	Noelin	-	-	-	-	-	+	-	-	-	-
722	P55285	Cadherin-6	-	-	-	-	-	+	-	-	-	-
723	O43505	Beta-1,4-glucuronyltransferase 1	-	-	-	-	-	+	-	-	-	-
724	P05455	Lupus La protein	-	-	-	-	-	+	-	-	-	-
725	Q92859	Neogenin	-	-	-	-	-	+	-	-	-	-
726	P13010	X-ray repair cross-complementing protein 5	-	-	-	-	-	+	-	-	-	-
727	O00187	Mannan-binding lectin serine protease 2	-	-	-	-	-	+	-	-	-	-
728	Q01995	Transgelin	-	-	-	-	-	+	-	-	-	-
729	P40197	Platelet glycoprotein V	-	-	-	-	-	+	-	-	-	-
730	P55287	Cadherin-11	-	-	-	-	-	+	-	-	-	-
731	P26572	Alpha-1,3-mannosyl-glycoprotein 2-beta-N-acetylglucosaminyltransferase	-	-	-	-	-	+	-	-	-	-
732	Q13867	Bleomycin hydrolase	-	-	-	-	-	+	-	-	-	-
733	P0DOY2	Immunoglobulin lambda constant 2	-	-	-	-	-	+	-	+	+	+
734	Q8WZ75	Roundabout homolog 4	-	-	-	-	-	+	-	-	-	-
735	O00462	Beta-mannosidase	-	-	-	-	-	+	-	-	-	-
736	O75326	Semaphorin-7A	-	-	-	-	-	+	-	-	-	-
737	P09238	Stromelysin-2	-	-	-	-	-	+	-	-	-	-
738	O75347	Tubulin-specific chaperone A	-	-	-	-	-	+	-	-	-	-
739	Q13219	Pappalysin-1	-	-	-	-	-	+	-	-	-	-
740	P12821	Angiotensin-converting enzyme	-	-	-	-	-	+	-	-	-	-
741	P06748	Nucleophosmin	-	-	-	-	-	+	-	-	-	-
742	P35916	Vascular endothelial growth factor receptor 3	-	-	-	-	-	+	-	-	-	-
743	Q14240	Eukaryotic initiation factor 4A-II	-	-	-	-	-	+	-	-	-	-
744	P13716	Delta-aminolevulinic acid dehydratase	-	-	-	-	-	+	-	-	-	-
745	Q7Z7G0	Target of Nesh-SH3	-	-	-	-	-	+	-	-	-	-
746	Q16851	UTP--glucose-1-phosphate uridylyltransferase	-	-	-	-	-	+	-	-	-	-
747	P22897	Macrophage mannose receptor 1	-	-	-	-	-	+	-	-	-	-
748	P15121	Aldo-keto reductase family 1 member B1	-	-	-	-	-	+	-	-	-	-
749	Q9H4A9	Dipeptidase 2	-	-	-	-	-	+	-	-	-	-
750	Q13332	Receptor-type tyrosine-protein phosphatase S	-	-	-	-	-	+	-	-	-	-
751	P54727	UV excision repair protein RAD23 homolog B	-	-	-	-	-	+	-	-	-	-
752	P06865	Beta-hexosaminidase subunit alpha	-	-	-	-	-	+	-	-	-	-
753	Q86YZ3	Hornerin	-	-	-	-	-	+	-	-	-	-
754	P25787	Proteasome subunit alpha type-2	-	-	-	-	-	+	-	-	-	-
755	Q15181	Inorganic pyrophosphatase	-	-	-	-	-	+	-	-	-	-
756	P30046	D-dopachrome decarboxylase	-	-	-	-	-	+	-	-	-	-
757	O43493	Trans-Golgi network integral membrane protein 2	-	-	-	-	-	+	-	-	-	-
758	Q15293	Reticulocalbin-1	-	-	-	-	-	+	-	-	-	-
759	P15311	Ezrin	-	-	-	-	-	+	-	-	-	-
760	Q08830	Fibrinogen-like protein 1	-	-	-	-	-	+	-	-	-	-
761	P80303	Nucleobindin-2	-	-	-	-	-	+	-	-	-	-
762	P31939	Bifunctional purine biosynthesis protein PURH	-	-	-	-	-	+	-	-	-	-
763	P09382	Galectin-1	-	-	-	-	-	+	-	-	-	-
764	Q00839	Heterogeneous nuclear ribonucleoprotein U	-	-	-	-	-	+	-	-	-	-
765	P30044	Peroxiredoxin-5, mitochondrial	-	-	-	-	-	+	-	-	-	-
766	P49641	Alpha-mannosidase 2x	-	-	-	-	-	+	-	-	-	-
767	Q06481	Amyloid-like protein 2	-	-	-	-	-	+	-	-	-	-
768	Q9Y5C1	Angiopoietin-related protein 3	-	-	-	-	-	+	-	-	-	-
769	P12956	X-ray repair cross-complementing protein 6	-	-	-	-	-	+	-	-	-	-
770	P20061	Transcobalamin-1	-	-	-	-	-	+	-	-	-	-
771	P00568	Adenylate kinase isoenzyme 1	-	-	-	-	-	+	-	-	-	-
772	O00339	Matrilin-2	-	-	-	-	-	+	-	-	-	-
773	P17813	Endoglin	-	-	-	-	-	+	-	-	-	-
774	P06753	Tropomyosin alpha-3 chain	-	-	-	-	-	+	-	-	-	-
775	Q9Y490	Talin-1	-	-	-	-	-	+	-	-	-	-
776	Q06323	Proteasome activator complex subunit 1	-	-	-	-	-	+	-	-	-	-
777	O60462	Neuropilin-2	-	-	-	-	-	+	-	-	-	-
778	P05109	Protein S100-A8	-	-	-	-	-	+	+	-	-	-
779	Q9UKU6	Thyrotropin-releasing hormone-degrading ectoenzyme	-	-	-	-	-	+	-	-	-	-
780	P26639	Threonine--tRNA ligase, cytoplasmic	-	-	-	-	-	+	-	-	-	-
781	P37837	Transaldolase	-	-	-	-	-	+	-	-	-	-
782	Q8WWZ8	Oncoprotein-induced transcript 3 protein	-	-	-	-	-	+	-	-	-	-
783	Q9NPY3	Complement component C1q receptor	-	-	-	-	-	+	-	-	-	-
784	P14543	Nidogen-1	-	-	-	-	-	+	-	-	-	-
785	Q10471	Polypeptide N-acetylgalactosaminyltransferase 2	-	-	-	-	-	+	-	-	-	-
786	Q13421	Mesothelin	-	-	-	-	-	+	-	-	-	-
787	P02545	Prelamin-A/C	-	-	-	-	-	+	-	-	-	-
788	P63241	Eukaryotic translation initiation factor 5A-1	-	-	-	-	-	+	-	-	-	-
789	Q9NY97	N-acetyllactosaminide beta-1,3-N-acetylglucosaminyltransferase 2	-	-	-	-	-	+	-	-	-	-
790	Q9UL46	Proteasome activator complex subunit 2	-	-	-	-	-	+	-	-	-	-
791	O60361	Putative nucleoside diphosphate kinase	-	-	-	-	-	+	-	-	-	-
792	Q9H4G4	Golgi-associated plant pathogenesis-related protein 1	-	-	-	-	-	+	-	-	-	-
793	P13797	Plastin-3	-	-	-	-	-	+	-	-	-	-
794	Q9NZ08	Endoplasmic reticulum aminopeptidase 1	-	-	-	-	-	+	-	-	-	-
795	P25774	Cathepsin S	-	-	-	-	-	+	-	-	-	-
796	Q9UBR2	Cathepsin Z	-	-	-	-	-	+	-	-	-	-
797	Q5D862	Filaggrin-2	-	-	-	-	-	+	-	-	-	-
798	P61160	Actin-related protein 2	-	-	-	-	-	+	-	-	-	-
799	P04066	Tissue alpha-L-fucosidase	-	-	-	-	-	+	-	-	-	-
800	Q99435	Protein kinase C-binding protein NELL2	-	-	-	-	-	+	-	-	-	-
801	Q96QK1	Vacuolar protein sorting-associated protein 35	-	-	-	-	-	+	-	-	-	-
802	Q7KZF4	Staphylococcal nuclease domain-containing protein 1	-	-	-	-	-	+	-	-	-	-
803	Q9NRN5	Olfactomedin-like protein 3	-	-	-	-	-	+	-	-	-	-
804	Q7Z7M8	UDP-GlcNAc:betaGal beta-1,3-N-acetylglucosaminyltransferase 8	-	-	-	-	-	+	-	-	-	-
805	P61088	Ubiquitin-conjugating enzyme E2 N	-	-	-	-	-	+	-	-	-	-
806	Q9BWD1	Acetyl-CoA acetyltransferase, cytosolic	-	-	-	-	-	+	-	-	-	-
807	P07686	Beta-hexosaminidase subunit beta	-	-	-	-	-	+	-	-	-	-
808	P09960	Leukotriene A-4 hydrolase	-	-	-	-	-	+	-	-	-	-
809	P52907	F-actin-capping protein subunit alpha-1	-	-	-	-	-	+	-	-	-	-
810	Q9BY67	Cell adhesion molecule 1	-	-	-	-	-	+	-	-	-	-
811	P00533	Epidermal growth factor receptor	-	-	-	-	-	+	-	-	-	-
812	Q9Y6Z7	Collectin-10	-	-	-	-	-	+	-	-	-	-
813	Q13231	Chitotriosidase-1	-	-	-	-	-	+	-	-	-	-
814	P12110	Collagen alpha-2(VI) chain	-	-	-	-	-	+	-	-	-	-
815	P09429	High mobility group protein B1	-	-	-	-	-	+	-	-	-	-
816	Q3SY84	Keratin, type II cytoskeletal 71	-	-	-	-	-	+	-	-	-	-
817	Q07960	Rho GTPase-activating protein 1	-	-	-	-	-	+	-	-	-	-
818	Q15393	Splicing factor 3B subunit 3	-	-	-	-	-	+	-	-	-	-
819	P11362	Fibroblast growth factor receptor 1	-	-	-	-	-	+	-	-	-	-
820	O14773	Tripeptidyl-peptidase 1	-	-	-	-	-	+	-	-	-	-
821	P14550	Aldo-keto reductase family 1 member A1	-	-	-	-	-	+	-	-	-	-
822	Q8IUL8	Cartilage intermediate layer protein 2	-	-	-	-	-	+	-	-	-	-
823	Q8WUM4	Programmed cell death 6-interacting protein	-	-	-	-	-	+	-	-	-	-
824	Q99941	Cyclic AMP-dependent transcription factor ATF-6 beta	-	-	-	-	-	+	-	-	-	-
825	P80723	Brain acid soluble protein 1	-	-	-	-	-	+	-	-	-	-
826	O15335	Chondroadherin	-	-	-	-	-	+	-	-	-	-
827	P16152	Carbonyl reductase [NADPH] 1	-	-	-	-	-	+	-	-	-	-
828	Q13449	Limbic system-associated membrane protein	-	-	-	-	-	+	-	-	-	-
829	P48163	NADP-dependent malic enzyme	-	-	-	-	-	+	-	-	-	-
830	P40926	Malate dehydrogenase, mitochondrial	-	-	-	-	-	+	-	-	-	-
831	P62249	40S ribosomal protein S16	-	-	-	-	-	+	-	-	-	-
832	P42785	Lysosomal Pro-X carboxypeptidase	-	-	-	-	-	+	-	-	-	-
833	P60900	Proteasome subunit alpha type-6	-	-	-	-	-	+	-	-	-	-
834	O75368	SH3 domain-binding glutamic acid-rich-like protein	-	-	-	-	-	+	-	-	-	-
835	P62942	Peptidyl-prolyl cis-trans isomerase FKBP1A	-	-	-	-	-	+	-	-	-	-
836	Q99538	Legumain	-	-	-	-	-	+	-	-	-	-
837	Q8TBY8	Polyamine-modulated factor 1-binding protein 1	-	-	-	-	-	+	-	-	-	-
838	P78324	Tyrosine-protein phosphatase non-receptor type substrate 1	-	-	-	-	-	+	-	-	-	-
839	P31323	cAMP-dependent protein kinase type II-beta regulatory subunit	-	-	-	-	-	+	-	-	-	-
840	Q9NTU7	Cerebellin-4	-	-	-	-	-	+	-	-	-	-
841	P55786	Puromycin-sensitive aminopeptidase	-	-	-	-	-	+	-	-	-	-
842	P12645	Bone morphogenetic protein 3	-	-	-	-	-	+	-	-	-	-
843	P54578	Ubiquitin carboxyl-terminal hydrolase 14	-	-	-	-	-	+	-	-	-	-
844	Q13508	Ecto-ADP-ribosyltransferase 3	-	-	-	-	-	+	-	-	-	-
845	Q04760	Lactoylglutathione lyase	-	-	-	-	-	+	-	-	-	-
846	Q13185	Chromobox protein homolog 3	-	-	-	-	-	+	-	-	-	-
847	P55103	Inhibin beta C chain	-	-	-	-	-	+	-	-	-	-
848	P08833	Insulin-like growth factor-binding protein 1	-	-	-	-	-	+	-	-	-	-
849	Q9BRA2	Thioredoxin domain-containing protein 17	-	-	-	-	-	+	-	-	-	-
850	O14818	Proteasome subunit alpha type-7	-	-	-	-	-	+	-	-	-	-
851	P07711	Cathepsin L1	-	-	-	-	-	+	-	-	-	-
852	P08779	Keratin, type I cytoskeletal 16	-	-	-	-	-	+	-	-	-	-
853	Q00688	Peptidyl-prolyl cis-trans isomerase FKBP3	-	-	-	-	-	+	-	-	-	-
854	P21333	Filamin-A	-	-	-	-	-	+	-	-	-	-
855	P62987	Ubiquitin-60S ribosomal protein L40	-	-	-	-	-	+	-	-	-	-
856	O75356	Ectonucleoside triphosphate diphosphohydrolase 5	-	-	-	-	-	+	-	-	-	-
857	P63244	Receptor of activated protein C kinase 1	-	-	-	-	-	+	-	-	-	-
858	P63208	S-phase kinase-associated protein 1	-	-	-	-	-	+	-	-	-	-
859	O75223	Gamma-glutamylcyclotransferase	-	-	-	-	-	+	-	-	-	-
860	Q7Z3Y8	Keratin, type I cytoskeletal 27	-	-	-	-	-	+	-	-	-	-
861	Q8NCC3	Group XV phospholipase A2	-	-	-	-	-	+	-	-	-	-
862	P20908	Collagen alpha-1(V) chain	-	-	-	-	-	+	-	-	-	-
863	Q15819	Ubiquitin-conjugating enzyme E2 variant 2	-	-	-	-	-	+	-	-	-	-
864	P52272	Heterogeneous nuclear ribonucleoprotein M	-	-	-	-	-	+	-	-	-	-
865	P53004	Biliverdin reductase A	-	-	-	-	-	+	-	-	-	-
866	P23396	40S ribosomal protein S3	-	-	-	-	-	+	-	-	-	-
867	Q9P1U1	Actin-related protein 3B	-	-	-	-	-	+	-	-	-	-
868	Q99650	Oncostatin-M-specific receptor subunit beta	-	-	-	-	-	+	-	-	-	-
869	Q07955	Serine/arginine-rich splicing factor 1	-	-	-	-	-	+	-	-	-	-
870	O60243	Heparan-sulfate 6-O-sulfotransferase 1	-	-	-	-	-	+	-	-	-	-
871	Q15262	Receptor-type tyrosine-protein phosphatase kappa	-	-	-	-	-	+	-	-	-	-
872	P27816	Microtubule-associated protein 4	-	-	-	-	-	+	-	-	-	-
873	Q13243	Serine/arginine-rich splicing factor 5	-	-	-	-	-	+	-	-	-	-
874	P10586	Receptor-type tyrosine-protein phosphatase F	-	-	-	-	-	+	-	-	-	-
875	Q02487	Desmocollin-2	-	-	-	-	-	+	-	-	-	-
876	Q12906	Interleukin enhancer-binding factor 3	-	-	-	-	-	+	-	-	-	-
877	P16403	Histone H1.2	-	-	-	-	-	+	-	-	-	-
878	Q9BWS9	Chitinase domain-containing protein 1	-	-	-	-	-	+	-	-	-	-
879	Q16222	UDP-N-acetylhexosamine pyrophosphorylase	-	-	-	-	-	+	-	-	-	-
880	P06576	ATP synthase subunit beta, mitochondrial	-	-	-	-	-	+	-	-	-	-
881	P27635	60S ribosomal protein L10	-	-	-	-	-	+	-	-	-	-
882	P35442	Thrombospondin-2	-	-	-	-	-	+	-	-	-	-
883	Q07075	Glutamyl aminopeptidase	-	-	-	-	-	+	-	-	-	-
884	P27348	14-3-3 protein theta	-	-	-	-	-	+	-	-	-	-
885	Q01130	Serine/arginine-rich splicing factor 2	-	-	-	-	-	+	-	-	-	-
886	Q14112	Nidogen-2	-	-	-	-	-	+	-	-	-	-
887	P80188	Neutrophil gelatinase-associated lipocalin	-	-	-	-	-	+	-	-	-	-
888	O94760	N(G),N(G)-dimethylarginine dimethylaminohydrolase 1	-	-	-	-	-	+	-	-	-	-
889	P20933	N(4)-(beta-N-acetylglucosaminyl)-L-asparaginase	-	-	-	-	-	+	-	-	-	-
890	Q71DI3	Histone H3.2	-	-	-	-	-	+	-	-	-	-
891	Q9NPR2	Semaphorin-4B	-	-	-	-	-	+	-	-	-	-
892	P31944	Caspase-14	-	-	-	-	-	+	-	-	-	-
893	Q9H299	SH3 domain-binding glutamic acid-rich-like protein 3	-	-	-	-	-	+	-	-	-	-
894	P00505	Aspartate aminotransferase, mitochondrial	-	-	-	-	-	+	-	-	-	-
895	Q96CN7	Isochorismatase domain-containing protein 1	-	-	-	-	-	+	-	-	-	-
896	Q8NC51	Plasminogen activator inhibitor 1 RNA-binding protein	-	-	-	-	-	+	-	-	-	-
897	P55209	Nucleosome assembly protein 1-like 1	-	-	-	-	-	+	-	-	-	-
898	P62269	40S ribosomal protein S18	-	-	-	-	-	+	-	-	-	-
899	P39687	Acidic leucine-rich nuclear phosphoprotein 32 family member A	-	-	-	-	-	+	-	-	-	-
900	Q8WZA1	Protein O-linked-mannose beta-1,2-N-acetylglucosaminyltransferase 1	-	-	-	-	-	+	-	-	-	-
901	P16949	Stathmin	-	-	-	-	-	+	-	-	-	-
902	P11717	Cation-independent mannose-6-phosphate receptor	-	-	-	-	-	+	-	-	-	-
903	Q9UBX1	Cathepsin F	-	-	-	-	-	+	-	-	-	-
904	P26599	Polypyrimidine tract-binding protein 1	-	-	-	-	-	+	-	-	-	-
905	P05388	60S acidic ribosomal protein P0	-	-	-	-	-	+	-	-	-	-
906	P30530	Tyrosine-protein kinase receptor UFO	-	-	-	-	-	+	-	-	-	-
907	O15394	Neural cell adhesion molecule 2	-	-	-	-	-	+	-	-	-	-
908	P09603	Macrophage colony-stimulating factor 1	-	-	-	-	-	+	-	-	-	-
909	P48723	Heat shock 70 kDa protein 13	-	-	-	-	-	+	-	-	-	-
910	Q16543	Hsp90 co-chaperone Cdc37	-	-	-	-	-	+	-	-	-	-
911	P54577	Tyrosine--tRNA ligase, cytoplasmic	-	-	-	-	-	+	-	-	-	-
912	P19961	Alpha-amylase 2B	-	-	-	-	-	+	-	-	-	-
913	Q9Y625	Glypican-6	-	-	-	-	-	+	-	-	-	-
914	P19256	Lymphocyte function-associated antigen 3	-	-	-	-	-	+	-	-	-	-
915	P52823	Stanniocalcin-1	-	-	-	-	-	+	-	-	-	-
916	P10109	Adrenodoxin, mitochondrial	-	-	-	-	-	+	-	-	-	-
917	Q8IWU5	Extracellular sulfatase Sulf-2	-	-	-	-	-	+	-	-	-	-
918	P13489	Ribonuclease inhibitor	-	-	-	-	-	+	-	-	-	-
919	Q13620	Cullin-4B	-	-	-	-	-	+	-	-	-	-
920	P13693	Translationally-controlled tumor protein	-	-	-	-	-	+	-	-	-	-
921	P35237	Serpin B6	-	-	-	-	-	+	-	-	-	-
922	P05556	Integrin beta-1	-	-	-	-	-	+	-	-	-	-
923	P14314	Glucosidase 2 subunit beta	-	-	-	-	-	+	-	-	-	-
924	Q7LGC8	Carbohydrate sulfotransferase 3	-	-	-	-	-	+	-	-	-	-
925	P15085	Carboxypeptidase A1	-	-	-	-	-	+	-	-	-	-
926	Q96NZ9	Proline-rich acidic protein 1	-	-	-	-	-	+	-	-	-	-
927	Q86TI0	TBC1 domain family member 1	-	-	-	-	-	+	-	-	-	-
928	Q92823	Neuronal cell adhesion molecule	-	-	-	-	-	+	-	-	-	-
929	Q16629	Serine/arginine-rich splicing factor 7	-	-	-	-	-	+	-	-	-	-
930	P16989	Y-box-binding protein 3	-	-	-	-	-	+	-	-	-	-
931	Q9BQ16	Testican-3	-	-	-	-	-	+	-	-	-	-
932	Q15056	Eukaryotic translation initiation factor 4H	-	-	-	-	-	+	-	-	-	-
933	P50502	Hsc70-interacting protein	-	-	-	-	-	+	-	-	-	-
934	P07738	Bisphosphoglycerate mutase	-	-	-	-	-	+	-	-	-	-
935	Q99983	Osteomodulin	-	-	-	-	-	+	-	-	-	-
936	Q9H0U4	Ras-related protein Rab-1B	-	-	-	-	-	+	-	-	-	-
937	P07307	Asialoglycoprotein receptor 2	-	-	-	-	-	+	-	-	-	-
938	P22234	Multifunctional protein ADE2	-	-	-	-	-	+	-	-	-	-
939	Q99584	Protein S100-A13	-	-	-	-	-	+	-	-	-	-
940	Q15166	Serum paraoxonase/lactonase 3	-	-	-	-	-	+	-	-	-	-
941	O00241	Signal-regulatory protein beta-1	-	-	-	-	-	+	-	-	-	-
942	P84243	Histone H3.3	-	-	-	-	-	+	-	-	-	-
943	P68431	Histone H3.1	-	-	-	-	-	+	-	-	-	-
944	P26583	High mobility group protein B2	-	-	-	-	-	+	-	-	-	-
945	O43776	Asparagine--tRNA ligase, cytoplasmic	-	-	-	-	-	+	-	-	-	-
946	P29508	Serpin B3	-	-	-	-	-	+	-	-	-	-
947	Q14152	Eukaryotic translation initiation factor 3 subunit A	-	-	-	-	-	+	-	-	-	-
948	Q9Y5B9	FACT complex subunit SPT16	-	-	-	-	-	+	-	-	-	-
949	P09874	Poly [ADP-ribose] polymerase 1	-	-	-	-	-	+	-	-	-	-
950	P34932	Heat shock 70 kDa protein 4	-	-	-	-	-	+	-	-	-	-
951	P05060	Secretogranin-1	-	-	-	-	-	+	-	-	-	-
952	Q16363	Laminin subunit alpha-4	-	-	-	-	-	+	-	-	-	-
953	P31948	Stress-induced-phosphoprotein 1	-	-	-	-	-	+	-	-	-	-
954	P53621	Coatomer subunit alpha	-	-	-	-	-	+	-	-	-	-
955	P82970	High mobility group nucleosome-binding domain-containing protein 5	-	-	-	-	-	+	-	-	-	-
956	P13497	Bone morphogenetic protein 1	-	-	-	-	-	+	-	-	-	-
957	Q9NS84	Carbohydrate sulfotransferase 7	-	-	-	-	-	+	-	-	-	-
958	P07384	Calpain-1 catalytic subunit	-	-	-	-	-	+	-	-	-	-
959	Q8IZF2	Adhesion G protein-coupled receptor F5	-	-	-	-	-	+	-	-	-	-
960	O00410	Importin-5	-	-	-	-	-	+	-	-	-	-
961	Q9UNZ2	NSFL1 cofactor p47	-	-	-	-	-	+	-	-	-	-
962	Q96G03	Phosphoglucomutase-2	-	-	-	-	-	+	-	-	-	-
963	P22079	Lactoperoxidase	-	-	-	-	-	+	-	-	-	-
964	Q13451	Peptidyl-prolyl cis-trans isomerase FKBP5	-	-	-	-	-	+	-	-	-	-
965	P40763	Signal transducer and activator of transcription 3	-	-	-	-	-	+	-	-	-	-
966	Q09328	Alpha-1,6-mannosylglycoprotein 6-beta-N-acetylglucosaminyltransferase A	-	-	-	-	-	+	-	-	-	-
967	Q9H173	Nucleotide exchange factor SIL1	-	-	-	-	-	+	-	-	-	-
968	O95897	Noelin-2	-	-	-	-	-	+	-	-	-	-
969	Q86UX7	Fermitin family homolog 3	-	-	-	-	-	+	-	-	-	-
970	Q96C19	EF-hand domain-containing protein D2	-	-	-	-	-	+	-	-	-	-
971	Q13617	Cullin-2	-	-	-	-	-	+	-	-	-	-
972	P10155	60 kDa SS-A/Ro ribonucleoprotein	-	-	-	-	-	+	-	-	-	-
973	Q9BQT9	Calsyntenin-3	-	-	-	-	-	+	-	-	-	-
974	Q96QP1	Alpha-protein kinase 1	-	-	-	-	-	+	-	-	-	-
975	P10645	Chromogranin-A	-	-	-	-	-	+	-	-	-	-
976	Q8TDX6	Chondroitin sulfate N-acetylgalactosaminyltransferase 1	-	-	-	-	-	+	-	-	-	-
977	P23526	Adenosylhomocysteinase	-	-	-	-	-	+	-	-	-	-
978	P08311	Cathepsin G	-	-	-	-	-	+	-	-	-	-
979	Q9BY76	Angiopoietin-related protein 4	-	-	-	-	-	+	-	-	-	-
980	Q9NZL9	Methionine adenosyltransferase 2 subunit beta	-	-	-	-	-	+	-	-	-	-
981	P62495	Eukaryotic peptide chain release factor subunit 1	-	-	-	-	-	+	-	-	-	-
982	P49354	Protein farnesyltransferase/geranylgeranyltransferase type-1 subunit alpha	-	-	-	-	-	+	-	-	-	-
983	P15586	N-acetylglucosamine-6-sulfatase	-	-	-	-	-	+	-	-	-	-
984	Q9BS26	Endoplasmic reticulum resident protein 44	-	-	-	-	-	+	-	-	-	-
985	P60891	Ribose-phosphate pyrophosphokinase 1	-	-	-	-	-	+	-	-	-	-
986	O00592	Podocalyxin	-	-	-	-	-	+	-	-	-	-
987	Q92563	Testican-2	-	-	-	-	-	+	-	-	-	-
988	Q15417	Calponin-3	-	-	-	-	-	+	-	-	-	-
989	P20290	Transcription factor BTF3	-	-	-	-	-	+	-	-	-	-
990	O15143	Actin-related protein 2/3 complex subunit 1B	-	-	-	-	-	+	-	-	-	-
991	Q99436	Proteasome subunit beta type-7	-	-	-	-	-	+	-	-	-	-
992	Q96HR9	Receptor expression-enhancing protein 6	-	-	-	-	-	+	-	-	-	-
993	P62314	Small nuclear ribonucleoprotein Sm D1	-	-	-	-	-	+	-	-	-	-
994	P61604	10 kDa heat shock protein, mitochondrial	-	-	-	-	-	+	-	-	-	-
995	P61086	Ubiquitin-conjugating enzyme E2 K	-	-	-	-	-	+	-	-	-	-
996	P30085	UMP-CMP kinase	-	-	-	-	-	+	-	-	-	-
997	Q8N126	Cell adhesion molecule 3	-	-	-	-	-	+	-	-	-	-
998	Q5T9C2	Protein FAM102A	-	-	-	-	-	+	-	-	-	-
999	Q16775	Hydroxyacylglutathione hydrolase, mitochondrial	-	-	-	-	-	+	-	-	-	-
1000	P31151	Protein S100-A7	-	-	-	-	-	+	-	-	-	-
1001	P23435	Cerebellin-1	-	-	-	-	-	+	-	-	-	-
1002	O15511	Actin-related protein 2/3 complex subunit 5	-	-	-	-	-	+	-	-	-	-
1003	Q9Y547	Intraflagellar transport protein 25 homolog	-	-	-	-	-	+	-	-	-	-
1004	Q13630	GDP-L-fucose synthase	-	-	-	-	-	+	-	-	-	-
1005	P62266	40S ribosomal protein S23	-	-	-	-	-	+	-	-	-	-
1006	P02792	Ferritin light chain	-	-	-	-	-	+	-	-	-	-
1007	Q9Y2V2	Calcium-regulated heat-stable protein 1	-	-	-	-	-	+	-	-	-	-
1008	Q9ULZ3	Apoptosis-associated speck-like protein containing a CARD	-	-	-	-	-	+	-	-	-	-
1009	Q6EEV6	Small ubiquitin-related modifier 4	-	-	-	-	-	+	-	-	-	-
1010	O60888	Protein CutA	-	-	-	-	-	+	-	-	-	-
1011	Q9UMX5	Neudesin	-	-	-	-	-	+	-	-	-	-
1012	Q96C90	Protein phosphatase 1 regulatory subunit 14B	-	-	-	-	-	+	-	-	-	-
1013	Q8NBF2	NHL repeat-containing protein 2	-	-	-	-	-	+	-	-	-	-
1014	P62888	60S ribosomal protein L30	-	-	-	-	-	+	-	-	-	-
1015	P61916	NPC intracellular cholesterol transporter 2	-	-	-	-	-	+	-	-	-	-
1016	P55056	Apolipoprotein C-IV	-	-	-	-	-	+	-	-	-	-
1017	P13987	CD59 glycoprotein	-	-	-	-	-	+	-	-	-	-
1018	Q9H2L4	Transmembrane protein 60	-	-	-	-	-	+	-	-	-	-
1019	P62304	Small nuclear ribonucleoprotein E	-	-	-	-	-	+	-	-	-	-
1020	P04080	Cystatin-B	-	-	-	-	-	+	-	-	-	-
1021	Q99426	Tubulin-folding cofactor B	-	-	-	-	-	+	-	-	-	-
1022	Q06828	Fibromodulin	-	-	-	-	-	+	-	-	-	-
1023	P18827	Syndecan-1	-	-	-	-	-	+	-	-	-	-
1024	P58546	Myotrophin	-	-	-	-	-	+	-	-	-	-
1025	Q86SQ4	Adhesion G-protein coupled receptor G6	-	-	-	-	-	+	-	-	-	-
1026	Q9NPG4	Protocadherin-12	-	-	-	-	-	+	-	-	-	-
1027	O14960	Leukocyte cell-derived chemotaxin-2	-	-	-	-	-	+	-	-	-	-
1028	Q12866	Tyrosine-protein kinase Mer	-	-	-	-	-	+	-	-	-	-
1029	P62913	60S ribosomal protein L11	-	-	-	-	-	+	-	-	-	-
1030	Q8IUX7	Adipocyte enhancer-binding protein 1	-	-	-	-	-	+	-	-	-	-
1031	Q96GX9	Methylthioribulose-1-phosphate dehydratase	-	-	-	-	-	+	-	-	-	-
1032	P51991	Heterogeneous nuclear ribonucleoprotein A3	-	-	-	-	-	+	-	-	-	-
1033	O15217	Glutathione S-transferase A4	-	-	-	-	-	+	-	-	-	-
1034	Q15185	Prostaglandin E synthase 3	-	-	-	-	-	+	-	-	-	-
1035	P52597	Heterogeneous nuclear ribonucleoprotein F	-	-	-	-	-	+	-	-	-	-
1036	Q6FHJ7	Secreted frizzled-related protein 4	-	-	-	-	-	+	-	-	-	-
1037	P56537	Eukaryotic translation initiation factor 6	-	-	-	-	-	+	-	-	-	-
1038	Q99733	Nucleosome assembly protein 1-like 4	-	-	-	-	-	+	-	-	-	-
1039	P20962	Parathymosin	-	-	-	-	-	+	-	-	-	-
1040	P25786	Proteasome subunit alpha type-1	-	-	-	-	-	+	-	-	-	-
1041	Q86X29	Lipolysis-stimulated lipoprotein receptor	-	-	-	-	-	+	-	-	-	-
1042	O95672	Endothelin-converting enzyme-like 1	-	-	-	-	-	+	-	-	-	-
1043	Q08345	Epithelial discoidin domain-containing receptor 1	-	-	-	-	-	+	-	-	-	-
1044	O00584	Ribonuclease T2	-	-	-	-	-	+	-	-	-	-
1045	P11684	Uteroglobin	-	-	-	-	-	+	-	-	-	-
1046	Q15691	Microtubule-associated protein RP/EB family member 1	-	-	-	-	-	+	-	-	-	-
1047	Q8NI22	Multiple coagulation factor deficiency protein 2	-	-	-	-	-	+	-	-	-	-
1048	Q9UHX1	Poly(U)-binding-splicing factor PUF60	-	-	-	-	-	+	-	-	-	-
1049	Q6UX72	UDP-GlcNAc:betaGal beta-1,3-N-acetylglucosaminyltransferase 9	-	-	-	-	-	+	-	-	-	-
1050	P24534	Elongation factor 1-beta	-	-	-	-	-	+	-	-	-	-
1051	Q8IWV2	Contactin-4	-	-	-	-	-	+	-	-	-	-
1052	P41250	Glycine--tRNA ligase	-	-	-	-	-	+	-	-	-	-
1053	P28066	Proteasome subunit alpha type-5	-	-	-	-	-	+	-	-	-	-
1054	P49721	Proteasome subunit beta type-2	-	-	-	-	-	+	-	-	-	-
1055	P30048	Thioredoxin-dependent peroxide reductase, mitochondrial	-	-	-	-	-	+	-	-	-	-
1056	Q92995	Ubiquitin carboxyl-terminal hydrolase 13	-	-	-	-	-	+	-	-	-	-
1057	P53999	Activated RNA polymerase II transcriptional coactivator p15	-	-	-	-	-	+	-	-	-	-
1058	Q86UP2	Kinectin	-	-	-	-	-	+	-	-	-	-
1059	Q9ULI3	Protein HEG homolog 1	-	-	-	-	-	+	-	-	-	-
1060	P51858	Hepatoma-derived growth factor	-	-	-	-	-	+	-	-	-	-
1061	P28838	Cytosol aminopeptidase	-	-	-	-	-	+	-	-	-	-
1062	Q68BL8	Olfactomedin-like protein 2B	-	-	-	-	-	+	-	-	-	-
1063	Q86SE5	RNA-binding Raly-like protein	-	-	-	-	-	+	-	-	-	-
1064	Q9H115	Beta-soluble NSF attachment protein	-	-	-	-	-	+	-	-	-	-
1065	P19105	Myosin regulatory light chain 12A	-	-	-	-	-	+	-	-	-	-
1066	O95185	Netrin receptor UNC5C	-	-	-	-	-	+	-	-	-	-
1067	P08581	Hepatocyte growth factor receptor	-	-	-	-	-	+	-	-	-	-
1068	P61163	Alpha-centractin	-	-	-	-	-	+	-	-	-	-
1069	Q8N118	Cytochrome P450 4X1	-	-	-	-	-	+	-	-	-	-
1070	Q9Y644	Beta-1,3-N-acetylglucosaminyltransferase radical fringe	-	-	-	-	-	+	-	-	-	-
1071	P41271	Neuroblastoma suppressor of tumorigenicity 1	-	-	-	-	-	+	-	-	-	-
1072	Q15257	Serine/threonine-protein phosphatase 2A activator	-	-	-	-	-	+	-	-	-	-
1073	P25789	Proteasome subunit alpha type-4	-	-	-	-	-	+	-	-	-	-
1074	P68036	Ubiquitin-conjugating enzyme E2 L3	-	-	-	-	-	+	-	-	-	-
1075	Q11206	CMP-N-acetylneuraminate-beta-galactosamide-alpha-2,3-sialyltransferase 4	-	-	-	-	-	+	-	-	-	-
1076	P47897	Glutamine--tRNA ligase	-	-	-	-	-	+	-	-	-	-
1077	Q09028	Histone-binding protein RBBP4	-	-	-	-	-	+	-	-	-	-
1078	P51688	N-sulphoglucosamine sulphohydrolase	-	-	-	-	-	+	-	-	-	-
1079	O43396	Thioredoxin-like protein 1	-	-	-	-	-	+	-	-	-	-
1080	P21810	Biglycan	-	-	-	-	-	+	-	-	-	-
1081	Q92598	Heat shock protein 105 kDa	-	-	-	-	-	+	-	-	-	-
1082	O14498	Immunoglobulin superfamily containing leucine-rich repeat protein	-	-	-	-	-	+	-	-	-	-
1083	O15144	Actin-related protein 2/3 complex subunit 2	-	-	-	-	-	+	-	-	-	-
1084	Q15435	Protein phosphatase 1 regulatory subunit 7	-	-	-	-	-	+	-	-	-	-
1085	Q96J42	Thioredoxin domain-containing protein 15	-	-	-	-	-	+	-	-	-	-
1086	P14780	Matrix metalloproteinase-9	-	-	-	-	-	+	-	-	-	-
1087	P34059	N-acetylgalactosamine-6-sulfatase	-	-	-	-	-	+	-	-	-	-
1088	Q9P232	Contactin-3	-	-	-	-	-	+	-	-	-	-
1089	P12318	Low affinity immunoglobulin gamma Fc region receptor II-a	-	-	-	-	-	+	-	-	-	-
1090	P08887	Interleukin-6 receptor subunit alpha	-	-	-	-	-	+	-	-	-	-
1091	O75487	Glypican-4	-	-	-	-	-	+	-	-	-	-
1092	Q9HC35	Echinoderm microtubule-associated protein-like 4	-	-	-	-	-	+	-	-	-	-
1093	Q9Y295	Developmentally-regulated GTP-binding protein 1	-	-	-	-	-	+	-	-	-	-
1094	O15072	A disintegrin and metalloproteinase with thrombospondin motifs 3	-	-	-	-	-	+	-	-	-	-
1095	Q15382	GTP-binding protein Rheb	-	-	-	-	-	+	-	-	-	-
1096	Q9BUD6	Spondin-2	-	-	-	-	-	+	-	-	-	-
1097	O94769	Extracellular matrix protein 2	-	-	-	-	-	+	-	-	-	-
1098	Q9GZP0	Platelet-derived growth factor D	-	-	-	-	-	+	-	-	-	-
1099	P11387	DNA topoisomerase 1	-	-	-	-	-	+	-	-	-	-
1100	P38159	RNA-binding motif protein, X chromosome	-	-	-	-	-	+	-	-	-	-
1101	P55010	Eukaryotic translation initiation factor 5	-	-	-	-	-	+	-	-	-	-
1102	P20827	Ephrin-A1	-	-	-	-	-	+	-	-	-	-
1103	P35754	Glutaredoxin-1	-	-	-	-	-	+	-	-	-	-
1104	P28827	Receptor-type tyrosine-protein phosphatase mu	-	-	-	-	-	+	-	-	-	-
1105	Q6UWB4	Serine protease 55	-	-	-	-	-	+	-	-	-	-
1106	P42224	Signal transducer and activator of transcription 1-alpha/beta	-	-	-	-	-	+	-	-	-	-
1107	P60842	Eukaryotic initiation factor 4A-I	-	-	-	-	-	+	-	-	-	-
1108	Q08554	Desmocollin-1	-	-	-	-	-	+	-	-	-	-
1109	Q00796	Sorbitol dehydrogenase	-	-	-	-	-	+	-	-	-	-
1110	Q9Y287	Integral membrane protein 2B	-	-	-	-	-	+	-	-	-	-
1111	P20810	Calpastatin	-	-	-	-	-	+	-	-	-	-
1112	Q15828	Cystatin-M	-	-	-	-	-	+	-	-	-	-
1113	Q9BYT8	Neurolysin, mitochondrial	-	-	-	-	-	+	-	-	-	-
1114	P16401	Histone H1.5	-	-	-	-	-	+	-	-	-	-
1115	O95747	Serine/threonine-protein kinase OSR1	-	-	-	-	-	+	-	-	-	-
1116	Q9NQ38	Serine protease inhibitor Kazal-type 5	-	-	-	-	-	+	-	-	-	-
1117	Q14696	LRP chaperone MESD	-	-	-	-	-	+	-	-	-	-
1118	P62191	26S proteasome regulatory subunit 4	-	-	-	-	-	+	-	-	-	-
1119	P05164	Myeloperoxidase	-	-	-	-	-	+	-	-	-	-
1120	Q86X52	Chondroitin sulfate synthase 1	-	-	-	-	-	+	-	-	-	-
1121	Q9BWP8	Collectin-11	-	-	-	-	-	+	-	-	-	-
1122	P0DJD9	Pepsin A-5	-	-	-	-	-	+	-	-	-	-
1123	A4D1P6	WD repeat-containing protein 91	-	-	-	-	-	+	-	-	-	-
1124	P14210	Hepatocyte growth factor	-	-	-	-	-	+	-	-	-	-
1125	Q99715	Collagen alpha-1(XII) chain	-	-	-	-	-	+	-	-	-	-
1126	Q9Y279	V-set and immunoglobulin domain-containing protein 4	-	-	-	-	-	+	-	-	-	-
1127	Q9HC38	Glyoxalase domain-containing protein 4	-	-	-	-	-	+	-	-	-	-
1128	Q8IX04	Ubiquitin-conjugating enzyme E2 variant 3	-	-	-	-	-	+	-	-	-	-
1129	P20042	Eukaryotic translation initiation factor 2 subunit 2	-	-	-	-	-	+	-	-	-	-
1130	P49915	GMP synthase [glutamine-hydrolyzing]	-	-	-	-	-	+	-	-	-	-
1131	Q6P2Q9	Pre-mRNA-processing-splicing factor 8	-	-	-	-	-	+	-	-	-	-
1132	P23246	Splicing factor, proline- and glutamine-rich	-	-	-	-	-	+	-	-	-	-
1133	P27361	Mitogen-activated protein kinase 3	-	-	-	-	-	+	-	-	-	-
1134	Q9HC56	Protocadherin-9	-	-	-	-	-	+	-	-	-	-
1135	O94919	Endonuclease domain-containing 1 protein	-	-	-	-	-	+	-	-	-	-
1136	A6NNA2	Serine/arginine repetitive matrix protein 3	-	-	-	-	-	+	-	-	-	-
1137	Q99542	Matrix metalloproteinase-19	-	-	-	-	-	+	-	-	-	-
1138	P09668	Pro-cathepsin H	-	-	-	-	-	+	-	-	-	-
1139	Q7Z3B1	Neuronal growth regulator 1	-	-	-	-	-	+	-	-	-	-
1140	Q9NS71	Gastrokine-1	-	-	-	-	-	+	-	-	-	-
1141	P83731	60S ribosomal protein L24	-	-	-	-	-	+	-	-	-	-
1142	Q6UWY5	Olfactomedin-like protein 1	-	-	-	-	-	+	-	-	-	-
1143	P78552	Interleukin-13 receptor subunit alpha-1	-	-	-	-	-	+	-	-	-	-
1144	P06703	Protein S100-A6	-	-	-	-	-	+	-	-	-	-
1145	Q14563	Semaphorin-3A	-	-	-	-	-	+	-	-	-	-
1146	P25788	Proteasome subunit alpha type-3	-	-	-	-	-	+	-	-	-	-
1147	P35606	Coatomer subunit beta'	-	-	-	-	-	+	-	-	-	-
1148	P15880	40S ribosomal protein S2	-	-	-	-	-	+	-	-	-	-
1149	P18085	ADP-ribosylation factor 4	-	-	-	-	-	+	-	-	-	-
1150	P07911	Uromodulin	-	-	-	-	-	+	-	-	-	-
1151	Q10469	Alpha-1,6-mannosyl-glycoprotein 2-beta-N-acetylglucosaminyltransferase	-	-	-	-	-	+	-	-	-	-
1152	O43707	Alpha-actinin-4	-	-	-	-	-	+	-	-	-	-
1153	P56199	Integrin alpha-1	-	-	-	-	-	+	-	-	-	-
1154	Q16531	DNA damage-binding protein 1	-	-	-	-	-	+	-	-	-	-
1155	Q86XW9	Thioredoxin domain-containing protein 6	-	-	-	-	-	+	-	-	-	-
1156	P0DMB2	Uncharacterized protein C8orf88	-	-	-	-	-	+	-	-	-	-
1157	Q9H1E3	Nuclear ubiquitous casein and cyclin-dependent kinase substrate 1	-	-	-	-	-	+	-	-	-	-
1158	Q66LE6	Serine/threonine-protein phosphatase 2A 55 kDa regulatory subunit B delta isoform	-	-	-	-	-	+	-	-	-	-
1159	Q6GTS8	N-fatty-acyl-amino acid synthase/hydrolase PM20D1	-	-	-	-	-	+	-	-	-	-
1160	Q13510	Acid ceramidase	-	-	-	-	-	+	-	-	-	-
1161	Q15121	Astrocytic phosphoprotein PEA-15	-	-	-	-	-	+	-	-	-	-
1162	Q14651	Plastin-1	-	-	-	-	-	+	-	-	-	-
1163	Q16787	Laminin subunit alpha-3	-	-	-	-	-	+	-	-	-	-
1164	Q7Z5H3	Rho GTPase-activating protein 22	-	-	-	-	-	-	+	-	-	-
1165	Q96PE2	Rho guanine nucleotide exchange factor 17	-	-	-	-	-	-	+	-	-	-
1166	Q2MV58	Tectonic-1	-	-	-	-	-	-	+	-	-	-
1167	Q6UWM9	UDP-glucuronosyltransferase 2A3	-	-	-	-	-	-	+	-	-	-
1168	Q9NXL2	Rho guanine nucleotide exchange factor 38	-	-	-	-	-	-	+	-	-	-
1169	P01825	Immunoglobulin heavy variable 4-59	-	-	-	-	-	-	-	+	-	-
1170	A0A0G2JS06	Immunoglobulin lambda variable 5-39	-	-	-	-	-	-	-	+	-	-
1171	A0A075B6K0	Immunoglobulin lambda variable 3-16	-	-	-	-	-	-	-	+	-	-
1172	O75643	U5 small nuclear ribonucleoprotein 200 kDa helicase	-	-	-	-	-	-	-	+	-	-
1173	Q96JG9	Zinc finger protein 469	-	-	-	-	-	-	-	+	+	-
1174	P78563	Double-stranded RNA-specific editase 1	-	-	-	-	-	-	-	+	-	-
1175	A7KAX9	Rho GTPase-activating protein 32	-	-	-	-	-	-	-	+	-	-
1176	Q9UL12	Sarcosine dehydrogenase, mitochondrial	-	-	-	-	-	-	-	+	-	-
1177	P0DP06	Immunoglobulin heavy variable 4-30-4	-	-	-	-	-	-	-	-	+	-
1178	P19012	Keratin, type I cytoskeletal 15	-	-	-	-	-	-	-	-	+	-
1179	A0A0C4DH42	Immunoglobulin heavy variable 3-66	-	-	-	-	-	-	-	-	+	-
1180	Q9P0G3	Kallikrein-14	-	-	-	-	-	-	-	-	+	-
1181	Q13286	Battenin	-	-	-	-	-	-	-	-	+	-
1182	O75140	GATOR complex protein DEPDC5	-	-	-	-	-	-	-	-	-	+

## Sheet: Table S7
Table S7. The results of quantitative analysis of unfractionated pool samples by the Triple Quad-TOF workflow along with TPA absolute concentration and coefficient of variation calculation.
N	Uniprot ID	Protein name	SWATH-MS intensity HFF1	SWATH-MS intensity HFF2	SWATH-MS intensity HFF3	TP HFF1	TP HFF2	TP HFF3	Concentration [pmol/mg] HFF1	Concentration [pmol/mg] HFF2	Concentration [pmol/mg] HFF3	Average	SD	CV
1	P01024	Complement C3	1.58875e+07	1.43721e+07	1.8414e+07	0.0389703	0.0389944	0.0443281	208.23	208.359	236.859	217.816	16.4917	7.57137
2	P02768	Serum albumin	1.08881e+08	8.75332e+07	7.79576e+07	0.267072	0.237495	0.187668	3850.18	3423.8	2705.47	3326.48	578.527	17.3916
3	P98160	Basement membrane-specific heparan sulfate proteoglycan core protein	832886	620726	971461	0.00204297	0.00168416	0.0023386	4.35759	3.59225	4.98817	4.31267	0.69904	16.209
4	P00450	Ceruloplasmin	5.23829e+06	4.72672e+06	6.23974e+06	0.0128489	0.0128245	0.015021	105.147	104.947	122.921	111.005	10.3202	9.29702
5	P0C0L4	Complement C4-A	473498	484126	79981.2	0.00116144	0.00131353	0.000192539	6.02467	6.81364	0.99875	4.61235	3.15424	68.3867
6	P02787	Serotransferrin	3.10692e+07	3.11246e+07	3.50132e+07	0.076209	0.0844474	0.0842875	988.918	1095.82	1093.75	1059.5	61.1314	5.76985
7	P02790	Hemopexin	9.46614e+06	1.39351e+07	1.62679e+07	0.0232193	0.0378087	0.0391617	449.325	731.649	757.832	646.269	171.06	26.4689
8	P01857	Immunoglobulin heavy constant gamma 1	9.05085e+06	1.24186e+07	1.37689e+07	0.0222007	0.0336942	0.0331459	614.892	933.228	918.041	822.054	179.568	21.8439
9	Q14624	Inter-alpha-trypsin inhibitor heavy chain H4	3.45177e+06	3.30087e+06	4.23412e+06	0.00846679	0.00895592	0.0101928	81.9156	86.6479	98.6147	89.0594	8.60679	9.66411
10	P01019	Angiotensinogen	5.54795e+06	5.04207e+06	5.9778e+06	0.0136085	0.0136802	0.0143904	256.02	257.368	270.73	261.373	8.13176	3.11118
11	P01031	Complement C5	452367	385251	557250	0.0011096	0.00104526	0.00134147	5.89275	5.55106	7.12411	6.1893	0.827394	13.3681
12	P00751	Complement factor B	1.25698e+06	1.20375e+06	1.40403e+06	0.00308323	0.00326601	0.00337993	36.0477	38.1847	39.5165	37.9163	1.74993	4.61526
13	P02774	Vitamin D-binding protein	2.53293e+06	2.0969e+06	2.64701e+06	0.00621299	0.00568932	0.00637216	117.41	107.514	120.418	115.114	6.75146	5.86502
14	P00747	Plasminogen	2.28633e+06	2.171e+06	1.88638e+06	0.00560809	0.00589038	0.00454109	61.9214	65.0382	50.1401	59.0332	7.85775	13.3107
15	P19827	Inter-alpha-trypsin inhibitor heavy chain H1	1.86496e+06	1.73717e+06	2.2101e+06	0.00457453	0.00471328	0.00532038	45.1182	46.4867	52.4744	48.0264	3.91235	8.14625
16	P08603	Complement factor H	1.61327e+06	1.40027e+06	1.71376e+06	0.00395717	0.00379922	0.00412555	28.4505	27.3149	29.661	28.4754	1.17326	4.12026
17	P19823	Inter-alpha-trypsin inhibitor heavy chain H2	2.51602e+06	2.33762e+06	2.8364e+06	0.00617149	0.00634244	0.00682809	57.97	59.5758	64.1376	60.5611	3.19965	5.28334
18	P02751	Fibronectin	852085	819372	935485	0.00209006	0.00222312	0.002252	7.95851	8.46517	8.57512	8.33293	0.328888	3.94685
19	P01023	Alpha-2-macroglobulin	1.71297e+06	1.58214e+06	1.79579e+06	0.00420172	0.00429266	0.00432301	25.7316	26.2886	26.4745	26.1649	0.386558	1.47739
20	P01009	Alpha-1-antitrypsin	1.34667e+07	1.30995e+07	1.47966e+07	0.0330321	0.0355415	0.0356199	706.781	760.474	762.152	743.136	31.495	4.23812
21	P04217	Alpha-1B-glycoprotein	3.48431e+06	3.34501e+06	4.03614e+06	0.0085466	0.00907569	0.0097162	157.532	167.285	179.091	167.969	10.7955	6.42705
22	P06396	Gelsolin	691346	692663	817729	0.00169579	0.00187934	0.00196852	19.7884	21.9303	22.971	21.5632	1.62272	7.52538
23	P01008	Antithrombin-III	3.5102e+06	3.53087e+06	3.22458e+06	0.00861012	0.00957997	0.00776255	163.684	182.122	147.571	164.459	17.2883	10.5122
24	P00734	Prothrombin	1.58827e+06	1.75003e+06	2.18508e+06	0.00389585	0.00474818	0.00526016	55.6264	67.7963	75.1065	66.1764	9.84057	14.8702
25	P01011	Alpha-1-antichymotrypsin	6.85082e+06	6.3707e+06	7.42776e+06	0.0168043	0.017285	0.0178809	352.66	362.749	375.254	363.554	11.3187	3.11333
26	P01859	Immunoglobulin heavy constant gamma 2	4.37699e+06	6.17597e+06	7.27581e+06	0.0107362	0.0167567	0.0175151	299.06	466.759	487.886	417.902	103.461	24.7572
27	P08697	Alpha-2-antiplasmin	614982	556916	625698	0.00150848	0.00151103	0.00150624	27.6455	27.6922	27.6046	27.6475	0.0438482	0.158598
28	P01042	Kininogen-1	3.978e+06	3.77476e+06	5.4542e+06	0.00975756	0.0102417	0.0131299	135.603	142.331	182.469	153.467	25.3403	16.5118
29	P02765	Alpha-2-HS-glycoprotein	2.84316e+06	3.39848e+06	3.02006e+06	0.00697394	0.00922077	0.00727021	177.274	234.387	184.805	198.822	31.0296	15.6067
30	P02647	Apolipoprotein A-I	3.94304e+07	2.73924e+07	3.83329e+07	0.0967182	0.0743211	0.0922789	3142.55	2414.83	2998.31	2851.89	385.322	13.5111
31	P04004	Vitronectin	6.15504e+06	5.77927e+06	6.69504e+06	0.0150976	0.0156803	0.016117	278.015	288.745	296.787	287.849	9.41813	3.2719
32	Q96PD5	N-acetylmuramoyl-L-alanine amidase	318839	331995	372006	0.000782075	0.00090077	0.000895532	12.5703	14.4781	14.3939	13.8141	1.07798	7.80349
33	P43652	Afamin	444325	433676	399855	0.00108988	0.00117665	0.000962572	15.7798	17.0361	13.9366	15.5842	1.55901	10.0038
34	P06727	Apolipoprotein A-IV	2.57253e+06	2.42243e+06	2.84118e+06	0.00631011	0.00657253	0.00683957	138.995	144.776	150.658	144.81	5.83147	4.02699
35	P04196	Histidine-rich glycoprotein	349614	443912	478937	0.000857561	0.00120442	0.00115295	14.3939	20.2159	19.3519	17.9872	3.14175	17.4665
36	P00738	Haptoglobin	9.8109e+06	9.17681e+06	1.1008e+07	0.024065	0.0248985	0.0264995	532.352	550.792	586.207	556.45	27.3698	4.91864
37	P05546	Heparin cofactor 2	1.2092e+06	605694	1.35593e+06	0.00296602	0.00164337	0.00326414	51.9717	28.7957	57.1954	45.9876	15.116	32.8697
38	P05155	Plasma protease C1 inhibitor	4.84916e+06	4.45561e+06	5.16464e+06	0.0118944	0.012089	0.0124329	215.658	219.186	225.421	220.088	4.94351	2.24615
39	Q06033	Inter-alpha-trypsin inhibitor heavy chain H3	82949.4	79058.7	100705	0.000203465	0.000214502	0.000242427	2.03775	2.14829	2.42796	2.20467	0.201123	9.12259
40	P02749	Beta-2-glycoprotein 1	789079	722436	844351	0.00193552	0.00196012	0.00203261	50.5383	51.1806	53.0735	51.5975	1.31802	2.55442
41	P02675	Fibrinogen beta chain	697786	789274	1.01321e+06	0.00171159	0.00214146	0.00243911	30.6034	38.2896	43.6116	37.5015	6.53984	17.4389
42	P02671	Fibrinogen alpha chain	3.48188e+06	2.18206e+06	3.82064e+06	0.00854064	0.00592038	0.00919745	89.928	62.3382	96.8438	83.0366	18.2559	21.9853
43	P01876	Immunoglobulin heavy constant alpha 1	3.54418e+06	3.4627e+06	4.19384e+06	0.00869346	0.00939502	0.0100958	230.877	249.509	268.121	249.503	18.622	7.46365
44	P02679	Fibrinogen gamma chain	2.12798e+06	2.04784e+06	2.38682e+06	0.00521967	0.00555621	0.0057458	101.331	107.864	111.545	106.914	5.17291	4.8384
45	P00748	Coagulation factor XII	248148	202023	275028	0.000608678	0.00054813	0.000662077	8.97874	8.08559	9.76645	8.94359	0.840978	9.40314
46	P03952	Plasma kallikrein	130299	125523	120836	0.000319607	0.000340568	0.000290889	4.47823	4.77194	4.07584	4.442	0.34946	7.86717
47	P20742	Pregnancy zone protein	327821	318825	356723	0.000804107	0.000865038	0.00085874	4.90728	5.27913	5.24069	5.14237	0.204496	3.97668
49	P02748	Complement component C9	1.236e+06	1.19304e+06	1.50329e+06	0.00303177	0.00323697	0.00361888	47.9916	51.2398	57.2853	52.1722	4.71648	9.0402
50	P10909	Clusterin	2.04716e+06	1.91086e+06	2.935e+06	0.00502144	0.00518456	0.00706543	95.6575	98.7648	134.595	109.672	21.6394	19.731
51	P01834	Immunoglobulin kappa constant	2.7271e+07	2.29686e+07	2.76418e+07	0.0668925	0.0623186	0.0665423	5685.72	5296.95	5655.95	5546.21	216.377	3.90134
52	P29622	Kallistatin	313672	288209	353727	0.0007694	0.000781971	0.000851528	15.8505	16.1095	17.5424	16.5008	0.911319	5.52287
53	P10643	Complement component C7	89858.1	87178.1	134972	0.000220411	0.000236532	0.000324919	2.35691	2.52929	3.47444	2.78688	0.601651	21.5887
54	P36955	Pigment epithelium-derived factor	676468	637972	733074	0.0016593	0.00173095	0.00176473	35.8287	37.3758	38.1053	37.1033	1.16253	3.13323
55	P07358	Complement component C8 beta chain	345006	279452	411521	0.00084626	0.000758211	0.000990656	12.6221	11.3088	14.7758	12.9022	1.75037	13.5665
56	P07093	Glia-derived nexin	324598	299695	355456	0.000796201	0.000813133	0.000855691	18.0946	18.4795	19.4466	18.6736	0.69659	3.73035
57	Q14520	Hyaluronan-binding protein 2	264952	275856	340191	0.000649896	0.000748452	0.000818942	10.37	11.9426	13.0673	11.7933	1.35486	11.4884
58	P05156	Complement factor I	418596	401209	497732	0.00102677	0.00108856	0.00119819	15.6162	16.5561	18.2235	16.7986	1.32043	7.86034
59	P02760	Protein AMBP	1.147e+06	1.09035e+06	1.70695e+06	0.00281345	0.00295834	0.00410914	72.1416	75.8568	105.365	84.4545	18.2042	21.555
60	P02652	Apolipoprotein A-II	6.58408e+06	6.43479e+06	7.06064e+06	0.01615	0.0174589	0.0169971	1445.19	1562.32	1520.99	1509.5	59.4043	3.93536
61	P08185	Corticosteroid-binding globulin	1.14242e+06	1.14055e+06	1.02826e+06	0.00280222	0.00309456	0.00247533	62.0784	68.5546	54.8368	61.8233	6.86247	11.1001
62	P25311	Zinc-alpha-2-glycoprotein	1.28845e+06	1.19621e+06	1.40036e+06	0.0031604	0.00324555	0.00337108	92.253	94.7384	98.4028	95.1314	3.09364	3.25196
63	P13645	Keratin, type I cytoskeletal 10	207020	174425	164728	0.000507796	0.000473251	0.000396551	8.63217	8.04493	6.74109	7.80606	0.967904	12.3994
64	P35908	Keratin, type II cytoskeletal 2 epidermal	40540.1	35955.4	30548.6	9.94402e-05	9.75543e-05	7.35398e-05	1.51975	1.49093	1.12391	1.3782	0.220687	16.0128
65	P07357	Complement component C8 alpha chain	298301	285640	354722	0.000731698	0.000774998	0.000853923	11.2287	11.8932	13.1044	12.0755	0.951027	7.87571
66	P02763	Alpha-1-acid glycoprotein 1	7.24416e+06	7.06844e+06	5.33664e+06	0.0177691	0.0191781	0.0128469	755.777	815.708	546.421	705.969	141.384	20.027
67	P26927	Hepatocyte growth factor-like protein	143104	91267.1	22720	0.000351016	0.000247626	5.46939e-05	4.37028	3.08303	0.680958	2.71142	1.87252	69.0605
68	P09871	Complement C1s subcomponent	95423.8	24328	46426.9	0.000234063	6.60069e-05	0.000111764	3.05231	0.860765	1.45746	1.79018	1.13302	63.2912
69	P04264	Keratin, type II cytoskeletal 1	110787	104137	91067	0.000271748	0.000282545	0.000219226	4.11502	4.27853	3.31969	3.90441	0.512939	13.1374
70	P05543	Thyroxine-binding globulin	78320.7	104818	91657.8	0.000192111	0.000284393	0.000220648	4.14713	6.13921	4.76315	5.0165	1.01992	20.3313
71	P01860	Immunoglobulin heavy constant gamma 3	1.40445e+06	1.3895e+06	1.66187e+06	0.00344494	0.00376999	0.00400062	83.4389	91.3118	96.8979	90.5496	6.76178	7.46749
72	P02750	Leucine-rich alpha-2-glycoprotein	991300	921228	1.01662e+06	0.00243154	0.00249948	0.00244732	63.6913	65.4708	64.1046	64.4222	0.931285	1.4456
73	P80108	Phosphatidylinositol-glycan-specific phospholipase D	68094.1	53163.5	70332.1	0.000167027	0.000144243	0.000169311	1.80892	1.56217	1.83366	1.73492	0.150111	8.65232
74	P04278	Sex hormone-binding globulin	177036	48030.8	52719.2	0.000434248	0.000130317	0.000126911	9.9191	2.97671	2.89891	5.2649	4.03084	76.5605
75	P68871	Hemoglobin subunit beta	2.06147e+06	2.01288e+06	2.31237e+06	0.00505654	0.00546136	0.00556657	316.073	341.378	347.954	335.135	16.8322	5.02251
76	P02766	Transthyretin	1.07441e+06	1.04763e+06	1.06256e+06	0.00263541	0.00284243	0.0025579	165.885	178.915	161.006	168.602	9.25874	5.49147
77	Q96KN2	Beta-Ala-His dipeptidase	63470.2	53059.3	69772.3	0.000155685	0.000143961	0.000167963	2.74552	2.53876	2.96205	2.74878	0.211663	7.70026
78	P02753	Retinol-binding protein 4	721362	1.09792e+06	1.4165e+06	0.00176942	0.00297888	0.00340995	76.8977	129.46	148.194	118.184	36.9617	31.2747
79	Q9UGM5	Fetuin-B	52865.1	45951.3	58024.9	0.000129672	0.000124675	0.000139684	3.08346	2.96464	3.32153	3.12321	0.181733	5.81879
80	P18428	Lipopolysaccharide-binding protein	308625	272834	338408	0.000757022	0.000740254	0.000814652	14.181	13.8668	15.2605	14.4361	0.731032	5.06391
81	P07225	Vitamin K-dependent protein S	23692.2	25903.4	34341.4	5.81142e-05	7.02813e-05	8.26702e-05	0.773597	0.935562	1.10048	0.936546	0.163443	17.4517
82	P43251	Biotinidase	114033	107383	129528	0.000279709	0.000291353	0.000311814	4.57549	4.76596	5.10066	4.81404	0.265868	5.52276
83	P07360	Complement component C8 gamma chain	251341	226345	166830	0.000616509	0.000614121	0.000401611	27.6747	27.5675	18.028	24.4234	5.53881	22.6783
84	P13611	Versican core protein	31177.6	92609.8	113673	7.6475e-05	0.000251269	0.000273645	0.205126	0.673969	0.733986	0.537694	0.289571	53.8543
85	P01871	Immunoglobulin heavy constant mu	931428	896399	991398	0.00228468	0.00243211	0.0023866	46.2122	49.1942	48.2735	47.8933	1.52694	3.18822
86	P01619	Immunoglobulin kappa variable 3-20	1.61571e+06	2.29788e+06	2.79919e+06	0.00396314	0.00623461	0.0067385	315.612	496.505	536.633	449.583	117.745	26.1897
87	P05154	Plasma serine protease inhibitor	256246	218429	270497	0.00062854	0.000592643	0.000651168	13.7614	12.9755	14.2569	13.6646	0.646142	4.72858
88	P27169	Serum paraoxonase/arylesterase 1	498998	468253	546740	0.00122398	0.00127047	0.00131617	30.8068	31.9767	33.127	31.9702	1.16013	3.62879
89	Q96IY4	Carboxypeptidase B2	67353.7	53406.6	158403	0.000165211	0.000144903	0.000381324	3.41175	2.99238	7.87469	4.7596	2.70588	56.8509
90	O14791	Apolipoprotein L1	395872	538642	690123	0.000971027	0.00146144	0.00166133	22.0818	33.2343	37.7799	31.032	8.07744	26.0294
91	Q08380	Galectin-3-binding protein	74221	327395	155861	0.000182055	0.000888288	0.000375204	2.7867	13.5969	5.74321	7.37562	5.58694	75.7487
92	P04003	C4b-binding protein alpha chain	46774	44932.4	47409.5	0.000114731	0.000121911	0.000114129	1.71156	1.81867	1.70258	1.74427	0.0645869	3.7028
93	P00740	Coagulation factor IX	59235.1	72898.8	72661.6	0.000145297	0.000197789	0.000174918	2.80615	3.81995	3.37824	3.33478	0.508297	15.2423
94	P01861	Immunoglobulin heavy constant gamma 4	1.47046e+06	1.60226e+06	1.97065e+06	0.00360687	0.00434725	0.00474395	100.358	120.958	131.996	117.771	16.0582	13.6351
95	P02743	Serum amyloid P-component	296149	414288	444015	0.000726419	0.00112405	0.00106888	28.6138	44.2765	42.1034	38.3312	8.48536	22.1369
96	P01033	Metalloproteinase inhibitor 1	211883	143802	181919	0.000519725	0.000390165	0.000437934	22.43	16.8385	18.9001	19.3895	2.82769	14.5836
97	P01782	Immunoglobulin heavy variable 3-9	247406	267084	287709	0.000606858	0.000724654	0.000692603	46.8798	55.9795	53.5035	52.1209	4.70477	9.02664
98	P15169	Carboxypeptidase N catalytic chain	22597.5	19744.4	32268.8	5.5429e-05	5.35706e-05	7.76808e-05	1.06011	1.02457	1.48569	1.19012	0.256584	21.5594
99	P00742	Coagulation factor X	333046	329179	377216	0.000816923	0.000893129	0.000908074	14.9261	16.3185	16.5916	15.9454	0.893206	5.60165
100	P02649	Apolipoprotein E	626482	601595	672388	0.00153669	0.00163225	0.00161864	42.5039	45.1471	44.7708	44.1406	1.42986	3.23934
101	P01700	Immunoglobulin lambda variable 1-47	945979	971088	1.16448e+06	0.00232038	0.00263476	0.00280326	188.91	214.504	228.223	210.546	19.9533	9.47696
102	P09486	SPARC	98181.2	91740.5	128953	0.000240827	0.00024891	0.000310429	6.95388	7.1873	8.96364	7.70161	1.09916	14.2719
103	P69905	Hemoglobin subunit alpha	2.28578e+06	2.32188e+06	2.53452e+06	0.00560675	0.00629972	0.00610135	367.487	412.907	399.905	393.433	23.3912	5.94541
104	Q04756	Hepatocyte growth factor activator	15149.4	26572.7	34548.4	3.71596e-05	7.20972e-05	8.31684e-05	0.525737	1.02004	1.17667	0.907482	0.339751	37.4389
105	P17936	Insulin-like growth factor-binding protein 3	40548.4	75642.9	37661.4	9.94605e-05	0.000205234	9.06625e-05	3.14013	6.47959	2.86236	4.16069	2.01302	48.3817
106	P05452	Tetranectin	262502	193593	287859	0.000643888	0.000525257	0.000692964	28.5702	23.3064	30.7478	27.5415	3.82587	13.8913
107	P15309	Prostatic acid phosphatase	75070.7	94146.2	128317	0.00018414	0.000255438	0.000308897	4.13184	5.73167	6.93123	5.59825	1.40445	25.0874
108	P49908	Selenoprotein P	71456.3	80543.7	49292.5	0.000175274	0.000218531	0.000118662	4.05981	5.06176	2.74853	3.9567	1.16006	29.3189
109	P02741	C-reactive protein	113798	105888	128961	0.000279132	0.000287295	0.000310448	11.1484	11.4744	12.3991	11.6739	0.648801	5.55769
110	P22352	Glutathione peroxidase 3	154778	132609	162117	0.000379652	0.000359796	0.000390265	14.858	14.0809	15.2734	14.7374	0.605284	4.10712
111	P36980	Complement factor H-related protein 2	83867.6	71498.2	94620.7	0.000205717	0.000193989	0.000227781	6.71182	6.32917	7.43167	6.82422	0.559781	8.20285
112	P19652	Alpha-1-acid glycoprotein 2	1.79326e+06	1.82249e+06	2.04438e+06	0.00439866	0.00494478	0.00492145	186.368	209.507	208.518	201.465	13.0831	6.494
113	P80748	Immunoglobulin lambda variable 3-21	359262	350702	422622	0.000881227	0.000951525	0.00101738	70.804	76.4523	81.7436	76.3333	5.47076	7.16693
114	P02654	Apolipoprotein C-I	1.19763e+06	1.09652e+06	1.29238e+06	0.00293765	0.00297508	0.00311115	314.8	318.811	333.392	322.334	9.78402	3.03536
115	A0A0C4DH38	Immunoglobulin heavy variable 5-51	242186	173127	237895	0.000594054	0.000469728	0.000572686	46.8719	37.0623	45.1859	43.0401	5.24504	12.1864
116	P00739	Haptoglobin-related protein	75573.8	106245	128748	0.000185374	0.000288264	0.000309936	4.74964	7.3859	7.94116	6.69223	1.70509	25.4786
117	P06312	Immunoglobulin kappa variable 4-1	792514	673177	780788	0.00194394	0.00182647	0.0018796	145.287	136.507	140.478	140.757	4.39668	3.12359
118	A0A0C4DH68	Immunoglobulin kappa variable 2-24	340612	324935	381840	0.000835482	0.000881615	0.000919205	63.8796	67.4069	70.281	67.1892	3.20623	4.77194
119	P0C0L5	Complement C4-B	603232	580491	687075	0.00147966	0.00157499	0.001654	7.67656	8.17115	8.58105	8.14292	0.452906	5.56196
120	P02747	Complement C1q subcomponent subunit C	113235	99615.2	148915	0.000277753	0.000270276	0.000358483	10.7769	10.4868	13.9093	11.7243	1.89777	16.1866
121	A0A075B6S2	Immunoglobulin kappa variable 2D-29	101930	168644	171575	0.000250022	0.000457566	0.000413034	19.0232	34.8144	31.4262	28.4213	8.31338	29.2506
122	P02656	Apolipoprotein C-III	1.73992e+06	1.55368e+06	1.73083e+06	0.00426782	0.00421546	0.00416662	393.275	388.45	383.95	388.558	4.66351	1.20021
123	P05090	Apolipoprotein D	1.01784e+06	648181	1.16047e+06	0.00249665	0.00175865	0.00279361	117.351	82.6625	131.309	110.441	25.0488	22.6807
124	P02655	Apolipoprotein C-II	245743	233863	252030	0.000602778	0.000634518	0.000606713	53.4188	56.2317	53.7676	54.4727	1.53327	2.81474
125	P35542	Serum amyloid A-4 protein	545979	483501	610832	0.00133922	0.00131184	0.00147046	90.8193	88.9622	99.7191	93.1669	5.74984	6.17154
127	P01718	Immunoglobulin lambda variable 3-27	108997	104568	128268	0.000267356	0.000283715	0.00030878	21.9775	23.3222	25.3827	23.5608	1.7151	7.27947
128	A0A0J9YX35	Immunoglobulin heavy variable 3-64D	2.1064e+06	1.60423e+06	2.49265e+06	0.00516674	0.00435261	0.00600056	402.959	339.464	467.989	403.471	64.2639	15.9278
129	Q9Y5Y7	Lymphatic vessel endothelial hyaluronic acid receptor 1	62517.6	39032.3	34748.3	0.000153348	0.000105903	8.36497e-05	4.35488	3.00749	2.37554	3.24597	1.01099	31.1461
130	A0A0B4J1X8	Immunoglobulin heavy variable 3-43	104472	91403.1	122042	0.000256256	0.000247995	0.000293793	19.596	18.9642	22.4664	20.3422	1.86652	9.1756
131	A0A0C4DH72	Immunoglobulin kappa variable 1-6	3.15945e+06	1.50689e+06	3.84433e+06	0.00774976	0.00408851	0.00925447	610.361	322.006	728.871	553.746	209.258	37.7895

## Sheet: Table S8
Table S8. List of all proteins identified in the study with the literature comparison to proteomic studies of hFF (Zamah et al., 2015 – 742 reported proteins; Bianchi et al., 2016 – 617 reported proteins; Oh et al., 2017 – 1079 reported proteins; Poulsen et al., 2019 – 400 reported proteins; Zhang et al., 2019 - 1153 reported proteins; and Pla et al., 2461 reported proteins) and related biologica…
			Identified in this study
N	Uniprot ID	Protein name	3TOF	QE	Human Plasma Proteome Database	Human oocyte (Virant-Klun, et al., 2016)	Human granulosa cell (Bagnjuk et al., 2019)	HFF (Zamah et al., 2015)	HFF (Bianchi et al., 2016)	HFF (Oh et al., 2017)	HFF (Poulsen et al., 2019)	HFF (Zhang et al., 2019)	HFF from human small antral follicles (Pla et al., 2020)
1	P02768	Serum albumin	+	+	+	+	+	+	+	+	+	-	+
2	P01024	Complement C3	+	+	+	+	+	+	+	+	+	+	+
3	P02787	Serotransferrin	HMW only	+	+	+	+	-	+	+	+	+	+
4	P0C0L4	Complement C4-A	HMW only	HMW only	+	+	-	+	+	+	+	+	+
5	P00450	Ceruloplasmin	HMW only	+	+	-	-	+	+	+	+	+	+
6	P01023	Alpha-2-macroglobulin	HMW only	+	+	-	-	+	+	+	+	+	+
7	P01009	Alpha-1-antitrypsin	HMW only	+	+	-	+	+	+	+	+	+	+
8	P01857	Immunoglobulin heavy constant gamma 1	HMW only	+	+	-	+	+	+	+	-	-	+
9	P00738	Haptoglobin	HMW only	+	+	+	-	+	+	+	+	+	+
10	P98160	Basement membrane-specific heparan sulfate proteoglycan core protein	HMW only	+	+	+	+	+	+	+	+	+	+
11	Q14624	Inter-alpha-trypsin inhibitor heavy chain H4	HMW only	+	+	-	-	+	-	+	+	+	+
12	P08603	Complement factor H	HMW only	HMW only	+	-	-	+	+	+	+	+	+
13	P02647	Apolipoprotein A-I	+	+	+	+	+	+	+	+	+	+	+
14	P00751	Complement factor B	HMW only	+	+	-	-	+	+	+	+	+	+
15	P01008	Antithrombin-III	HMW only	+	+	-	-	+	+	+	+	+	+
16	P02774	Vitamin D-binding protein	HMW only	+	+	-	-	+	+	+	+	+	+
17	P02790	Hemopexin	HMW only	+	+	oocyte specific	-	+	+	+	+	+	+
18	P19823	Inter-alpha-trypsin inhibitor heavy chain H2	HMW only	+	+	-	-	+	+	+	+	+	+
19	P06727	Apolipoprotein A-IV	HMW only	+	+	-	-	+	+	+	+	+	+
20	P01011	Alpha-1-antichymotrypsin	HMW only	+	+	-	-	+	+	+	+	+	+
21	P02675	Fibrinogen beta chain	+	+	+	+	+	+	+	+	+	+	+
22	P02671	Fibrinogen alpha chain	+	+	+	+	+	+	+	+	+	+	+
23	P01019	Angiotensinogen	HMW only	+	+	-	-	+	+	+	+	+	+
24	P00747	Plasminogen	HMW only	HMW only	+	-	-	+	+	+	+	+	+
25	P00734	Prothrombin	HMW only	+	+	+	-	+	+	+	+	+	+
26	P06396	Gelsolin	HMW only	+	+	+	+	+	+	+	+	-	+
27	P01876	Immunoglobulin heavy constant alpha 1	HMW only	+	-	-	-	+	+	+	+	+	+
28	P19827	Inter-alpha-trypsin inhibitor heavy chain H1	HMW only	+	+	oocyte specific	-	+	+	+	+	+	+
29	P04217	Alpha-1B-glycoprotein	HMW only	+	+	oocyte specific	-	+	+	+	+	+	+
30	P02679	Fibrinogen gamma chain	HMW only	+	+	-	+	+	+	+	+	+	+
31	P10909	Clusterin	HMW only	+	+	+	+	+	+	+	+	+	+
32	P02652	Apolipoprotein A-II	HMW only	+	+	-	-	+	+	+	+	+	+
33	P01859	Immunoglobulin heavy constant gamma 2	HMW only	+	-	-	+	-	+	+	+	+	+
34	P02749	Beta-2-glycoprotein 1	HMW only	HMW only	+	+	+	+	+	+	+	+	+
35	P43652	Afamin	HMW only	HMW only	+	oocyte specific	-	+	+	+	+	+	+
36	P01042	Kininogen-1	HMW only	+	+	-	-	+	+	+	+	+	+
37	P01834	Immunoglobulin kappa constant	HMW only	+	-	-	+	+	+	+	+	+	+
38	P02765	Alpha-2-HS-glycoprotein	HMW only	+	+	-	-	+	+	+	+	+	+
39	P36955	Pigment epithelium-derived factor	HMW only	HMW only	+	+	-	+	+	+	+	+	+
40	P04004	Vitronectin	HMW only	+	+	-	+	+	+	+	+	+	+
41	P02763	Alpha-1-acid glycoprotein 1	HMW only	+	+	+	+	-	+	+	+	+	+
42	P02748	Complement component C9	HMW only	HMW only	+	oocyte specific	+	+	+	+	+	+	+
43	P08697	Alpha-2-antiplasmin	HMW only	+	+	+	-	+	+	+	+	+	+
44	P01871	Immunoglobulin heavy constant mu	HMW only	HMW only	+	oocyte specific	-	+	+	+	+	+	+
45	P04196	Histidine-rich glycoprotein	HMW only	HMW only	+	-	-	+	+	+	+	+	+
46	P05155	Plasma protease C1 inhibitor	HMW only	HMW only	+	-	-	+	+	+	+	+	+
47	P68871	Hemoglobin subunit beta	HMW only	+	+	-	+	+	+	+	+	+	+
48	P05546	Heparin cofactor 2	HMW only	+	+	-	-	+	+	+	+	+	+
49	P0DOY3	Immunoglobulin lambda constant 3	HMW only	LMW only	-	-	+	+	+	+	-	+	-
50	P25311	Zinc-alpha-2-glycoprotein	HMW only	HMW only	+	+	-	+	+	+	+	+	+
51	P27169	Serum paraoxonase/arylesterase 1	HMW only	+	+	-	-	+	+	+	+	+	+
52	P02766	Transthyretin	HMW only	+	+	-	+	+	+	+	+	+	+
53	P19652	Alpha-1-acid glycoprotein 2	HMW only	HMW only	+	+	+	+	+	+	+	+	+
54	P02751	Fibronectin	HMW only	+	+	-	+	+	+	+	+	+	+
55	P05090	Apolipoprotein D	HMW only	HMW only	+	-	+	-	+	+	+	+	+
56	P08185	Corticosteroid-binding globulin	HMW only	+	+	-	-	+	+	+	+	+	+
57	P01780	Immunoglobulin heavy variable 3-7	HMW only	HMW only	-	-	-	-	+	+	+	+	+
58	P01031	Complement C5	HMW only	HMW only	+	+	-	+	+	+	+	+	+
59	P69905	Hemoglobin subunit alpha	HMW only	+	+	-	+	+	+	+	+	-	+
60	P01611	Immunoglobulin kappa variable 1D-12	HMW only	HMW only	-	-	-	-	-	-	-	-	-
61	P02753	Retinol-binding protein 4	HMW only	HMW only	+	-	-	+	+	+	+	+	+
62	P0DP03	Immunoglobulin heavy variable 3-30-5	HMW only	LMW only	-	-	-	-	-	-	+	-	+
63	P04264	Keratin, type II cytoskeletal 1	HMW only	HMW only	+	-	+	+	+	+	+	-	+
64	P01619	Immunoglobulin kappa variable 3-20	HMW only	+	-	+	-	-	+	+	+	+	+
65	P02656	Apolipoprotein C-III	HMW only	+	+	-	+	+	+	+	+	+	+
66	P01860	Immunoglobulin heavy constant gamma 3	HMW only	HMW only	+	-	+	-	+	+	+	+	+
67	P02760	Protein AMBP	HMW only	+	+	+	-	+	+	+	+	+	+
68	P29622	Kallistatin	HMW only	HMW only	+	-	-	+	+	+	+	+	+
69	P06681	Complement C2	HMW only	HMW only	+	-	-	+	+	+	+	+	+
70	P01782	Immunoglobulin heavy variable 3-9	HMW only	-	-	-	-	-	-	-	+	-	+
71	Q96PD5	N-acetylmuramoyl-L-alanine amidase	HMW only	HMW only	+	oocyte specific	-	+	+	+	+	+	+
72	P02654	Apolipoprotein C-I	HMW only	+	+	-	+	-	+	+	+	+	+
73	P05156	Complement factor I	HMW only	HMW only	+	-	+	+	+	+	+	+	+
74	P05543	Thyroxine-binding globulin	HMW only	HMW only	+	-	-	+	+	+	+	+	+
75	P07357	Complement component C8 alpha chain	HMW only	HMW only	+	+	-	+	+	+	+	+	+
76	P02743	Serum amyloid P-component	HMW only	HMW only	+	-	-	+	+	+	+	+	+
77	P20742	Pregnancy zone protein	HMW only	HMW only	+	-	-	+	+	+	+	+	+
78	P02750	Leucine-rich alpha-2-glycoprotein	HMW only	HMW only	+	-	-	+	+	+	+	+	+
79	P03952	Plasma kallikrein	HMW only	HMW only	+	-	-	+	+	+	+	+	+
80	P35858	Insulin-like growth factor-binding protein complex acid labile subunit	HMW only	HMW only	+	-	-	+	+	+	+	+	+
81	P06312	Immunoglobulin kappa variable 4-1	HMW only	+	-	-	-	-	+	+	+	+	+
82	P00748	Coagulation factor XII	HMW only	HMW only	+	-	-	+	+	+	+	+	+
83	P05452	Tetranectin	HMW only	HMW only	+	-	-	+	+	+	+	-	+
84	P01594	Immunoglobulin kappa variable 1-33	HMW only	HMW only	-	-	-	-	+	+	-	+	-
85	A0A0C4DH31	Immunoglobulin heavy variable 1-18	HMW only	HMW only	-	-	-	-	-	-	+	+	+
86	P04278	Sex hormone-binding globulin	HMW only	HMW only	+	-	-	+	+	+	+	+	+
87	P01714	Immunoglobulin lambda variable 3-19	HMW only	HMW only	-	-	-	-	-	-	+	+	+
88	P01615	Immunoglobulin kappa variable 2D-28	HMW only	HMW only	-	-	-	-	+	+	-	-	-
89	O95445	Apolipoprotein M	HMW only	HMW only	+	-	-	+	+	+	+	+	+
90	P01824	Immunoglobulin heavy variable 4-39	HMW only	-	-	-	-	-	-	+	-	-	-
91	P04433	Immunoglobulin kappa variable 3-11	HMW only	HMW only	-	-	-	-	+	-	+	-	-
92	P02649	Apolipoprotein E	HMW only	+	+	+	+	+	+	+	+	+	+
93	P13645	Keratin, type I cytoskeletal 10	+	HMW only	+	-	+	+	+	+	+	-	+
94	P80748	Immunoglobulin lambda variable 3-21	HMW only	HMW only	-	-	-	-	+	+	+	+	+
95	P01718	Immunoglobulin lambda variable 3-27	HMW only	HMW only	-	-	-	-	-	-	+	+	+
96	P13671	Complement component C6	HMW only	HMW only	+	-	-	+	+	+	+	+	+
97	P01700	Immunoglobulin lambda variable 1-47	HMW only	HMW only	-	-	-	-	+	-	+	+	+
98	A0A0C4DH69	Immunoglobulin kappa variable 1-9	HMW only	HMW only	-	-	-	-	-	-	-	-	-
99	B9A064	Immunoglobulin lambda-like polypeptide 5	HMW only	HMW only	-	-	+	-	+	+	-	-	+
100	P07358	Complement component C8 beta chain	HMW only	HMW only	+	-	-	+	+	+	+	+	+
101	P07093	Glia-derived nexin	HMW only	HMW only	+	+	+	+	+	+	+	+	+
102	P01861	Immunoglobulin heavy constant gamma 4	HMW only	HMW only	+	-	-	-	+	+	+	+	+
103	P01624	Immunoglobulin kappa variable 3-15	HMW only	HMW only	-	-	-	-	-	+	+	-	-
104	A0A075B6I9	Immunoglobulin lambda variable 7-46	HMW only	HMW only	-	-	-	-	-	-	+	+	+
105	P35542	Serum amyloid A-4 protein	HMW only	HMW only	+	-	-	-	+	+	+	+	+
106	P0C0L5	Complement C4-B	+	+	+	-	-	+	+	+	+	+	+
107	P00739	Haptoglobin-related protein	HMW only	HMW only	+	-	-	-	+	+	+	+	+
108	P01877	Immunoglobulin heavy constant alpha 2	HMW only	HMW only	+	-	-	-	+	+	-	-	+
109	A0A0C4DH72	Immunoglobulin kappa variable 1-6	HMW only	-	-	-	-	-	-	-	+	+	+
110	P01602	Immunoglobulin kappa variable 1-5	HMW only	HMW only	-	-	-	-	+	+	+	-	+
111	A0A0A0MS15	Immunoglobulin heavy variable 3-49	HMW only	HMW only	-	-	-	-	-	-	+	+	+
112	P04114	Apolipoprotein B-100	HMW only	HMW only	+	-	+	+	+	+	+	+	+
113	P01033	Metalloproteinase inhibitor 1	HMW only	HMW only	+	-	+	+	+	+	+	+	+
114	P07360	Complement component C8 gamma chain	HMW only	HMW only	+	-	-	+	+	+	+	+	+
115	A0A075B6I0	Immunoglobulin lambda variable 8-61	HMW only	HMW only	-	-	-	-	-	-	+	+	+
116	P36980	Complement factor H-related protein 2	HMW only	HMW only	+	-	-	+	+	+	+	+	+
117	P35527	Keratin, type I cytoskeletal 9	HMW only	HMW only	+	-	+	+	+	+	+	-	+
118	Q2KHR3	Glutamine and serine-rich protein 1	HMW only	-	-	-	-	-	-	-	-	-	-
119	Q92922	SWI/SNF complex subunit SMARCC1	HMW only	-	+	-	+	-	-	-	-	-	-
120	Q9NZP8	Complement C1r subcomponent-like protein	HMW only	HMW only	+	-	+	+	+	+	+	+	+
121	P02741	C-reactive protein	HMW only	HMW only	+	-	-	+	+	+	-	+	+
122	P10643	Complement component C7	HMW only	HMW only	+	-	+	+	+	+	+	+	+
123	P51884	Lumican	HMW only	HMW only	+	-	-	+	+	+	+	+	+
124	P07988	Pulmonary surfactant-associated protein B	HMW only	-	+	-	-	-	-	-	-	-	+
125	P02655	Apolipoprotein C-II	HMW only	HMW only	+	-	-	+	+	+	+	+	+
126	Q8NE71	ATP-binding cassette sub-family F member 1	HMW only	-	+	-	+	-	-	-	-	-	+
127	Q14520	Hyaluronan-binding protein 2	HMW only	HMW only	+	-	-	+	+	+	+	+	+
128	Q8N2G8	GH3 domain-containing protein	HMW only	-	+	-	+	-	-	-	-	-	-
129	Q66K66	Transmembrane protein 198	HMW only	HMW only	+	-	-	-	-	-	+	-	+
130	P04432	Immunoglobulin kappa variable 1D-39	HMW only	+	-	-	-	-	-	-	-	+	+
131	P01743	Immunoglobulin heavy variable 1-46	HMW only	HMW only	-	-	-	-	-	+	+	+	+
132	P18428	Lipopolysaccharide-binding protein	HMW only	HMW only	+	-	-	+	+	+	+	+	+
133	A0A087WSY6	Immunoglobulin kappa variable 3D-15	HMW only	HMW only	-	-	-	-	-	-	+	+	+
134	A0A0B4J1Y9	Immunoglobulin heavy variable 3-72	HMW only	HMW only	-	-	-	-	-	-	+	+	+
135	A0A0C4DH55	Immunoglobulin kappa variable 3D-7	HMW only	-	-	-	-	-	-	-	-	-	+
136	P01591	Immunoglobulin J chain	HMW only	HMW only	+	oocyte specific	-	+	+	+	+	+	+
137	A0A075B6K5	Immunoglobulin lambda variable 3-9	HMW only	HMW only	-	-	-	-	-	-	+	+	+
138	P04211	Immunoglobulin lambda variable 7-43	HMW only	HMW only	-	-	-	-	-	-	+	+	+
139	P15309	Prostatic acid phosphatase	HMW only	HMW only	+	-	+	+	+	+	+	+	-
140	Q12884	Prolyl endopeptidase FAP	HMW only	HMW only	+	-	-	+	-	+	-	-	+
141	O95613	Pericentrin	HMW only	-	+	-	+	-	-	-	-	-	-
142	P05154	Plasma serine protease inhibitor	HMW only	HMW only	+	-	-	+	+	+	+	+	+
143	Q9UKW4	Guanine nucleotide exchange factor VAV3	HMW only	-	+	-	-	-	-	-	-	-	-
144	Q08380	Galectin-3-binding protein	HMW only	HMW only	+	-	+	+	+	+	+	+	+
145	P01880	Immunoglobulin heavy constant delta	HMW only	HMW only	-	-	-	-	+	+	-	-	+
146	Q96KN2	Beta-Ala-His dipeptidase	HMW only	HMW only	+	-	-	+	+	+	+	+	+
147	Q06033	Inter-alpha-trypsin inhibitor heavy chain H3	HMW only	HMW only	+	+	-	+	+	+	+	+	+
148	P22792	Carboxypeptidase N subunit 2	HMW only	HMW only	+	-	-	+	+	+	+	+	+
149	P00742	Coagulation factor X	HMW only	HMW only	+	-	-	+	+	+	+	+	+
150	P63261	Actin, cytoplasmic 2	HMW only	+	+	-	+	+	-	+	-	+	+
151	Q16610	Extracellular matrix protein 1	HMW only	+	+	-	+	+	+	+	+	+	+
152	P13611	Versican core protein	HMW only	+	+	-	+	+	+	+	+	+	+
153	P15169	Carboxypeptidase N catalytic chain	HMW only	+	+	-	-	+	+	+	+	+	+
154	P00740	Coagulation factor IX	HMW only	HMW only	+	-	-	+	+	+	+	+	+
155	P61769	Beta-2-microglobulin	HMW only	HMW only	+	-	+	+	+	+	+	+	+
156	P43251	Biotinidase	HMW only	HMW only	+	-	-	+	+	+	+	+	+
157	Q9UK55	Protein Z-dependent protease inhibitor	HMW only	HMW only	+	-	-	+	+	+	+	+	+
158	P03951	Coagulation factor XI	HMW only	HMW only	+	-	-	+	+	+	+	+	+
159	Q96IY4	Carboxypeptidase B2	HMW only	HMW only	+	-	-	+	+	+	+	+	+
160	P09871	Complement C1s subcomponent	HMW only	HMW only	+	-	-	+	+	+	+	+	+
161	Q9UGM5	Fetuin-B	HMW only	HMW only	+	-	-	+	+	+	+	+	+
162	O75882	Attractin	HMW only	HMW only	+	+	-	+	+	+	+	-	+
163	P07225	Vitamin K-dependent protein S	HMW only	HMW only	+	-	-	+	+	+	+	+	+
164	P08263	Glutathione S-transferase A1	HMW only	HMW only	+	-	+	+	+	+	-	-	+
165	P17936	Insulin-like growth factor-binding protein 3	HMW only	HMW only	+	-	-	+	+	+	+	+	+
166	P09486	SPARC	HMW only	HMW only	+	-	+	+	+	+	+	+	+
167	P08571	Monocyte differentiation antigen CD14	HMW only	HMW only	+	-	-	+	+	+	+	+	+
168	P04070	Vitamin K-dependent protein C	HMW only	+	+	-	-	+	+	+	+	+	+
169	P00915	Carbonic anhydrase 1	HMW only	HMW only	+	-	-	+	+	+	+	-	+
170	P49908	Selenoprotein P	HMW only	HMW only	+	-	-	+	+	+	+	+	+
171	P00736	Complement C1r subcomponent	HMW only	HMW only	+	-	-	+	+	+	+	+	+
172	P60174	Triosephosphate isomerase	HMW only	HMW only	+	+	+	+	+	+	+	+	+
173	P14151	L-selectin	HMW only	HMW only	+	-	-	+	+	+	+	-	+
174	P22352	Glutathione peroxidase 3	HMW only	HMW only	+	-	-	+	+	+	+	+	+
175	Q03591	Complement factor H-related protein 1	HMW only	HMW only	+	-	-	+	+	+	+	+	+
176	O00391	Sulfhydryl oxidase 1	HMW only	+	+	+	-	+	+	+	+	+	+
177	P35443	Thrombospondin-4	HMW only	HMW only	+	-	-	+	+	+	+	+	+
178	Q15848	Adiponectin	HMW only	HMW only	+	-	-	+	+	+	-	+	+
179	Q04756	Hepatocyte growth factor activator	HMW only	HMW only	+	-	-	+	+	+	+	+	+
180	P11226	Mannose-binding protein C	HMW only	HMW only	+	-	-	+	+	+	+	+	+
181	O95497	Pantetheinase	HMW only	HMW only	+	-	-	+	+	+	-	+	+
182	P24593	Insulin-like growth factor-binding protein 5	HMW only	+	+	-	+	+	+	+	-	+	+
183	P22891	Vitamin K-dependent protein Z	HMW only	HMW only	+	-	-	+	+	+	+	+	+
184	P01034	Cystatin-C	HMW only	HMW only	+	-	+	+	+	+	+	+	+
185	P15151	Poliovirus receptor	HMW only	HMW only	+	-	+	+	-	+	-	-	+
186	P80108	Phosphatidylinositol-glycan-specific phospholipase D	HMW only	HMW only	+	-	-	+	+	+	+	+	+
187	Q16270	Insulin-like growth factor-binding protein 7	HMW only	HMW only	+	-	+	+	+	+	-	+	+
188	O75874	Isocitrate dehydrogenase [NADP] cytoplasmic	HMW only	HMW only	+	-	+	+	-	+	-	+	+
189	P07237	Protein disulfide-isomerase	HMW only	HMW only	+	+	+	+	-	+	-	+	+
190	P05160	Coagulation factor XIII B chain	HMW only	HMW only	+	-	-	+	+	+	+	+	+
191	P06276	Cholinesterase	HMW only	HMW only	+	-	-	+	+	+	+	+	+
192	P00746	Complement factor D	HMW only	HMW only	+	-	-	+	+	+	+	+	+
193	P13598	Intercellular adhesion molecule 2	HMW only	HMW only	+	-	-	+	+	+	-	-	+
194	Q9BW27	Nuclear pore complex protein Nup85	HMW only	-	-	-	+	-	-	-	-	-	-
195	P06858	Lipoprotein lipase	HMW only	HMW only	+	-	-	+	+	+	+	+	+
196	P32119	Peroxiredoxin-2	HMW only	HMW only	+	+	+	+	+	+	+	+	+
197	Q12889	Oviduct-specific glycoprotein	HMW only	HMW only	+	-	-	+	-	-	+	-	-
198	Q15582	Transforming growth factor-beta-induced protein ig-h3	HMW only	HMW only	+	-	-	+	+	+	+	+	+
199	O43236	Septin-4	HMW only	-	+	-	-	-	-	-	-	-	-
200	P19883	Follistatin	HMW only	HMW only	+	-	-	+	+	+	+	+	+
201	A0A0C4DH25	Immunoglobulin kappa variable 3D-20	HMW only	+	-	-	-	-	-	-	+	+	+
202	O14791	Apolipoprotein L1	HMW only	+	+	-	-	+	+	+	+	+	+
203	A0A0J9YX35	Immunoglobulin heavy variable 3-64D	HMW only	HMW only	-	-	-	-	-	-	+	+	+
204	P04259	Keratin, type II cytoskeletal 6B	HMW only	HMW only	+	-	+	+	-	+	+	+	+
205	Q8IYK2	Coiled-coil domain-containing protein 105	HMW only	-	-	-	-	-	-	-	-	-	-
206	Q8N3K9	Cardiomyopathy-associated protein 5	HMW only	-	-	-	-	-	-	-	-	-	-
207	P01764	Immunoglobulin heavy variable 3-23	HMW only	HMW only	-	-	-	-	+	+	-	+	+
208	P04003	C4b-binding protein alpha chain	HMW only	HMW only	+	-	-	+	+	+	+	+	+
209	A0A075B6S5	Immunoglobulin kappa variable 1-27	HMW only	HMW only	-	-	-	-	-	-	+	-	+
210	P26927	Hepatocyte growth factor-like protein	HMW only	HMW only	+	-	-	+	+	+	+	+	+
211	P06310	Immunoglobulin kappa variable 2-30	HMW only	HMW only	-	-	-	-	+	-	+	-	+
212	P06733	Alpha-enolase	HMW only	HMW only	+	+	+	+	+	+	+	+	+
213	P23142	Fibulin-1	HMW only	HMW only	+	-	-	+	+	+	+	+	+
214	P60709	Actin, cytoplasmic 1	HMW only	HMW only	+	+	+	+	+	+	+	-	+
215	P13796	Plastin-2	HMW only	HMW only	+	-	+	+	+	+	-	-	+
216	P07437	Tubulin beta chain	HMW only	HMW only	+	+	+	+	+	-	-	+	+
217	P14618	Pyruvate kinase PKM	HMW only	HMW only	+	+	+	+	-	+	+	+	+
218	P01717	Immunoglobulin lambda variable 3-25	HMW only	HMW only	-	-	-	-	+	-	+	+	+
219	P01703	Immunoglobulin lambda variable 1-40	HMW only	HMW only	-	-	-	-	-	-	+	-	+
220	P11597	Cholesteryl ester transfer protein	HMW only	HMW only	+	-	-	+	-	+	+	+	+
221	A0A075B6R2	Immunoglobulin heavy variable 4-4	HMW only	HMW only	-	-	-	-	-	-	+	-	+
222	P0DP09	Immunoglobulin kappa variable 1-13	HMW only	HMW only	-	-	-	-	-	-	+	-	+
223	P68363	Tubulin alpha-1B chain	HMW only	-	+	-	+	-	+	+	+	+	+
224	O43866	CD5 antigen-like	HMW only	HMW only	+	-	-	+	+	+	+	+	+
225	P04406	Glyceraldehyde-3-phosphate dehydrogenase	HMW only	HMW only	+	+	+	+	+	+	+	+	+
226	P12111	Collagen alpha-3(VI) chain	HMW only	HMW only	+	-	-	+	+	+	+	+	+
227	P35908	Keratin, type II cytoskeletal 2 epidermal	HMW only	HMW only	+	-	+	+	+	+	+	-	+
228	P01701	Immunoglobulin lambda variable 1-51	HMW only	HMW only	-	-	-	-	-	-	+	+	+
229	P04180	Phosphatidylcholine-sterol acyltransferase	HMW only	HMW only	+	-	-	+	+	+	+	+	+
230	P04075	Fructose-bisphosphate aldolase A	HMW only	HMW only	+	+	+	+	+	+	+	+	+
231	A0A0B4J1V0	Immunoglobulin heavy variable 3-15	HMW only	HMW only	-	-	-	-	-	-	+	+	+
232	P55058	Phospholipid transfer protein	HMW only	HMW only	+	-	-	+	+	+	+	+	+
233	P33908	Mannosyl-oligosaccharide 1,2-alpha-mannosidase IA	HMW only	HMW only	+	-	-	+	+	+	+	+	+
234	P00338	L-lactate dehydrogenase A chain	HMW only	HMW only	+	+	+	+	+	+	-	+	+
235	A0A0C4DH68	Immunoglobulin kappa variable 2-24	HMW only	HMW only	-	-	-	-	-	-	+	+	+
236	P16112	Aggrecan core protein	HMW only	HMW only	+	oocyte specific	-	+	+	+	+	-	+
237	P05111	Inhibin alpha chain	HMW only	+	+	-	+	+	+	+	+	+	+
238	P01772	Immunoglobulin heavy variable 3-33	HMW only	-	-	-	-	-	+	-	-	-	-
239	A0A075B6S2	Immunoglobulin kappa variable 2D-29	HMW only	HMW only	-	-	-	-	-	-	+	-	-
240	Q9BXR6	Complement factor H-related protein 5	HMW only	HMW only	+	-	-	+	+	+	+	+	+
241	P62937	Peptidyl-prolyl cis-trans isomerase A	HMW only	HMW only	+	-	+	+	+	+	-	+	+
242	P00488	Coagulation factor XIII A chain	HMW only	+	+	-	-	+	+	+	+	+	+
243	P01721	Immunoglobulin lambda variable 6-57	HMW only	HMW only	-	-	-	-	-	-	+	+	+
244	P02786	Transferrin receptor protein 1	HMW only	HMW only	+	-	+	+	+	+	-	-	+
245	P12259	Coagulation factor V	HMW only	HMW only	+	-	-	+	+	+	-	+	+
246	P07602	Prosaposin	HMW only	HMW only	+	-	+	+	-	+	-	+	+
247	P27918	Properdin	HMW only	HMW only	+	-	-	+	+	+	+	+	+
248	P01742	Immunoglobulin heavy variable 1-69	HMW only	HMW only	-	-	-	-	-	-	+	+	+
249	P08238	Heat shock protein HSP 90-beta	HMW only	HMW only	+	+	+	+	+	+	-	+	+
250	A0A0C4DH38	Immunoglobulin heavy variable 5-51	HMW only	HMW only	-	-	-	-	-	-	+	+	+
251	P08572	Collagen alpha-2(IV) chain	HMW only	HMW only	+	+	+	+	+	+	+	+	+
252	P39059	Collagen alpha-1(XV) chain	HMW only	HMW only	+	-	-	+	+	+	-	+	+
253	P01599	Immunoglobulin kappa variable 1-17	HMW only	HMW only	-	-	-	-	+	-	+	-	+
254	P11142	Heat shock cognate 71 kDa protein	HMW only	HMW only	+	+	+	+	+	+	-	+	+
255	Q5VTE0	Putative elongation factor 1-alpha-like 3	HMW only	HMW only	-	-	+	-	-	+	-	+	-
256	P08709	Coagulation factor VII	HMW only	HMW only	+	-	-	+	+	+	-	+	+
257	P12955	Xaa-Pro dipeptidase	HMW only	HMW only	+	-	+	+	+	+	-	-	+
258	P47972	Neuronal pentraxin-2	HMW only	HMW only	+	-	+	+	+	+	+	+	+
259	O75636	Ficolin-3	HMW only	HMW only	+	-	-	+	+	+	+	+	+
260	P14625	Endoplasmin	HMW only	HMW only	+	+	+	+	+	+	-	+	+
261	A0A0A0MT36	Immunoglobulin kappa variable 6D-21	HMW only	HMW only	-	-	-	-	-	-	+	-	+
262	A0A075B6I1	Immunoglobulin lambda variable 4-60	HMW only	HMW only	-	-	-	-	-	-	+	+	+
263	Q13822	Ectonucleotide pyrophosphatase/phosphodiesterase family member 2	HMW only	HMW only	+	-	-	+	+	+	-	-	+
264	P01614	Immunoglobulin kappa variable 2D-40	HMW only	HMW only	-	-	-	-	-	-	-	-	-
265	P01704	Immunoglobulin lambda variable 2-14	HMW only	HMW only	-	-	-	-	-	-	+	-	+
266	Q9NQ79	Cartilage acidic protein 1	HMW only	HMW only	+	-	-	+	+	+	+	+	+
267	P04439	HLA class I histocompatibility antigen, A alpha chain	HMW only	-	+	-	+	-	-	+	-	+	+
268	P09211	Glutathione S-transferase P	HMW only	HMW only	+	+	+	+	-	+	+	-	+
269	P09455	Retinol-binding protein 1	HMW only	HMW only	+	+	+	+	+	-	-	+	+
270	Q16658	Fascin	HMW only	HMW only	+	+	+	+	-	+	-	+	+
271	P02746	Complement C1q subcomponent subunit B	HMW only	HMW only	+	-	-	+	+	+	+	+	+
272	P07195	L-lactate dehydrogenase B chain	HMW only	HMW only	+	-	+	+	+	+	+	+	+
273	Q9UNW1	Multiple inositol polyphosphate phosphatase 1	HMW only	HMW only	+	-	+	+	+	+	-	+	+
274	P55268	Laminin subunit beta-2	HMW only	HMW only	+	-	+	+	+	+	-	+	+
275	P08476	Inhibin beta A chain	HMW only	HMW only	+	-	+	+	+	+	+	+	+
276	P15144	Aminopeptidase N	HMW only	HMW only	+	-	+	+	+	+	-	-	+
277	P22105	Tenascin-X	HMW only	HMW only	+	-	-	+	+	+	-	+	+
278	P02745	Complement C1q subcomponent subunit A	HMW only	HMW only	+	-	-	+	+	+	+	+	+
279	P02747	Complement C1q subcomponent subunit C	HMW only	HMW only	+	-	-	+	+	+	+	+	+
280	Q15113	Procollagen C-endopeptidase enhancer 1	HMW only	HMW only	+	-	-	+	+	+	+	+	+
281	Q9UHG3	Prenylcysteine oxidase 1	HMW only	HMW only	+	+	+	+	-	+	+	+	+
282	P55072	Transitional endoplasmic reticulum ATPase	HMW only	HMW only	+	+	+	+	-	-	-	+	+
283	P19320	Vascular cell adhesion protein 1	HMW only	HMW only	+	-	+	+	+	+	-	+	+
284	Q6UXB8	Peptidase inhibitor 16	HMW only	HMW only	+	-	-	+	-	+	+	-	+
285	P01767	Immunoglobulin heavy variable 3-53	HMW only	HMW only	-	-	-	-	+	+	-	-	+
286	A0A0C4DH33	Immunoglobulin heavy variable 1-24	HMW only	HMW only	-	-	-	-	-	-	+	+	+
287	P0DP08	Immunoglobulin heavy variable 4-38-2	HMW only	HMW only	-	-	-	-	-	-	-	+	+
288	A0A0J9YVY3	Immunoglobulin heavy variable 7-4-1	HMW only	-	-	-	-	-	-	-	-	-	+
289	P63104	14-3-3 protein zeta/delta	HMW only	HMW only	+	-	+	+	+	+	+	+	+
290	Q12805	EGF-containing fibulin-like extracellular matrix protein 1	HMW only	HMW only	+	-	-	+	+	+	+	+	+
291	P0DP01	Immunoglobulin heavy variable 1-8	HMW only	HMW only	-	-	-	-	-	-	+	-	+
292	A0A0B4J1V6	Immunoglobulin heavy variable 3-73	HMW only	HMW only	-	-	-	-	-	-	+	+	+
293	P09172	Dopamine beta-hydroxylase	HMW only	HMW only	+	-	-	+	+	+	+	-	+
294	Q92820	Gamma-glutamyl hydrolase	HMW only	HMW only	+	-	+	+	+	+	-	-	+
295	Q13790	Apolipoprotein F	HMW only	HMW only	+	-	-	+	+	+	+	+	+
296	P07737	Profilin-1	HMW only	HMW only	+	+	+	+	+	+	-	+	+
297	P07996	Thrombospondin-1	HMW only	HMW only	+	-	+	+	+	+	-	-	+
298	P02462	Collagen alpha-1(IV) chain	HMW only	HMW only	+	+	+	+	+	+	+	+	+
299	P26038	Moesin	HMW only	HMW only	+	-	+	+	+	+	-	+	+
300	P48740	Mannan-binding lectin serine protease 1	HMW only	HMW only	+	-	-	+	+	+	-	+	+
301	P01817	Immunoglobulin heavy variable 2-5	HMW only	HMW only	-	-	-	-	-	-	+	-	+
302	A0A0B4J1U7	Immunoglobulin heavy variable 6-1	HMW only	HMW only	-	-	-	-	-	-	+	+	+
303	P33151	Cadherin-5	HMW only	HMW only	+	-	-	+	+	+	+	-	+
304	P19021	Peptidyl-glycine alpha-amidating monooxygenase	HMW only	HMW only	+	-	+	+	+	+	+	+	+
305	A0A087WSX0	Immunoglobulin lambda variable 5-45	HMW only	HMW only	-	-	-	-	-	-	+	-	+
306	P02042	Hemoglobin subunit delta	HMW only	HMW only	+	-	+	-	-	+	+	-	+
307	P00558	Phosphoglycerate kinase 1	HMW only	HMW only	+	+	+	+	+	+	-	+	+
308	A0A075B6H9	Immunoglobulin lambda variable 4-69	HMW only	HMW only	-	-	-	-	-	-	+	+	+
309	Q9UNN8	Endothelial protein C receptor	HMW only	HMW only	+	-	-	+	+	+	-	-	+
310	P49327	Fatty acid synthase	HMW only	HMW only	+	+	+	+	+	-	-	+	+
311	Q15392	Delta(24)-sterol reductase	HMW only	HMW only	-	+	+	-	-	-	-	-	+
312	P41222	Prostaglandin-H2 D-isomerase	HMW only	HMW only	+	-	-	+	+	+	+	+	+
313	Q8WUA8	Tsukushin	HMW only	HMW only	+	-	-	+	-	+	-	+	+
314	P08133	Annexin A6	HMW only	HMW only	+	+	+	+	-	-	-	-	+
315	Q6UX71	Plexin domain-containing protein 2	HMW only	HMW only	+	-	+	+	-	-	+	+	+
316	A0A075B6S4	Immunoglobulin kappa variable 1D-17	HMW only	-	-	-	-	-	-	-	-	-	-
317	P06702	Protein S100-A9	+	+	+	+	+	+	-	+	+	+	+
318	A0A0B4J1U3	Immunoglobulin lambda variable 1-36	HMW only	HMW only	-	-	-	-	-	-	+	+	+
319	P78539	Sushi repeat-containing protein SRPX	HMW only	HMW only	+	-	-	+	+	+	+	+	+
320	P01762	Immunoglobulin heavy variable 3-11	HMW only	-	-	-	-	-	+	-	-	-	-
321	A0A075B6Q5	Immunoglobulin heavy variable 3-64	HMW only	HMW only	-	-	-	-	-	-	+	-	+
322	P13647	Keratin, type II cytoskeletal 5	HMW only	HMW only	+	-	+	+	+	+	+	-	+
323	P49747	Cartilage oligomeric matrix protein	HMW only	HMW only	+	-	-	+	+	+	+	-	+
324	Q9H8L6	Multimerin-2	HMW only	HMW only	+	-	-	+	+	+	+	+	+
325	P13591	Neural cell adhesion molecule 1	HMW only	HMW only	+	-	+	+	+	+	-	+	+
326	P04430	Immunoglobulin kappa variable 1-16	HMW only	HMW only	-	-	-	-	-	-	+	+	+
327	P0DJI8	Serum amyloid A-1 protein	HMW only	+	-	-	-	-	-	+	+	+	+
328	A0A075B6J9	Immunoglobulin lambda variable 2-18	HMW only	HMW only	-	-	-	-	-	-	+	-	+
329	P62258	14-3-3 protein epsilon	HMW only	HMW only	+	+	+	+	+	+	-	+	+
330	Q15063	Periostin	HMW only	HMW only	+	-	-	+	-	+	-	-	+
331	O14786	Neuropilin-1	HMW only	HMW only	+	-	+	+	+	+	-	+	+
332	O60664	Perilipin-3	HMW only	-	+	+	+	+	-	-	-	-	+
333	P26439	3 beta-hydroxysteroid dehydrogenase/Delta 5-->4-isomerase type 2	HMW only	HMW only	+	-	+	-	-	-	-	+	-
334	A0A0B4J1V2	Immunoglobulin heavy variable 2-26	HMW only	HMW only	-	-	-	-	-	-	+	-	+
335	P18065	Insulin-like growth factor-binding protein 2	HMW only	HMW only	+	+	-	+	+	+	+	+	+
336	P01344	Insulin-like growth factor II	HMW only	HMW only	+	-	-	+	+	+	+	+	+
337	P23083	Immunoglobulin heavy variable 1-2	HMW only	HMW only	-	-	-	-	-	-	+	+	+
338	O94985	Calsyntenin-1	HMW only	HMW only	+	-	-	+	+	+	-	+	+
339	P61626	Lysozyme C	HMW only	HMW only	+	-	-	+	+	+	+	+	+
340	P08195	4F2 cell-surface antigen heavy chain	HMW only	HMW only	+	+	+	+	-	+	-	-	+
341	P53396	ATP-citrate synthase	HMW only	HMW only	+	-	+	+	-	-	-	+	+
342	P26641	Elongation factor 1-gamma	HMW only	HMW only	+	+	+	+	-	-	-	+	+
343	P12109	Collagen alpha-1(VI) chain	HMW only	HMW only	+	-	+	+	+	+	+	+	+
344	P11047	Laminin subunit gamma-1	HMW only	HMW only	+	+	+	+	+	+	-	+	+
345	P01705	Immunoglobulin lambda variable 2-23	HMW only	HMW only	-	-	-	-	-	-	+	+	+
346	P36871	Phosphoglucomutase-1	HMW only	HMW only	+	+	+	+	-	-	-	+	+
347	Q9NPH3	Interleukin-1 receptor accessory protein	HMW only	HMW only	+	-	-	+	+	+	+	+	+
348	P22314	Ubiquitin-like modifier-activating enzyme 1	HMW only	HMW only	+	+	+	+	-	-	-	+	+
349	Q9HDC9	Adipocyte plasma membrane-associated protein	HMW only	HMW only	+	+	+	-	+	+	-	+	+
350	P13639	Elongation factor 2	HMW only	HMW only	+	+	+	+	-	+	-	+	+
351	P01699	Immunoglobulin lambda variable 1-44	HMW only	HMW only	-	-	-	-	-	-	+	-	+
352	P50395	Rab GDP dissociation inhibitor beta	HMW only	HMW only	+	-	+	+	+	+	-	-	+
353	Q8NBP7	Proprotein convertase subtilisin/kexin type 9	HMW only	HMW only	+	-	-	+	+	+	-	+	+
354	P11021	Endoplasmic reticulum chaperone BiP	HMW only	HMW only	+	+	+	+	+	+	+	+	+
355	P01766	Immunoglobulin heavy variable 3-13	HMW only	HMW only	-	-	-	+	+	+	+	+	+
356	P08758	Annexin A5	HMW only	HMW only	+	+	+	+	-	-	-	-	+
357	Q8N474	Secreted frizzled-related protein 1	HMW only	HMW only	-	-	-	-	-	-	+	+	+
358	Q14195	Dihydropyrimidinase-related protein 3	HMW only	HMW only	+	+	+	+	+	-	-	+	+
359	P01706	Immunoglobulin lambda variable 2-11	HMW only	HMW only	-	-	-	-	+	-	+	+	+
360	P01601	Immunoglobulin kappa variable 1D-16	HMW only	HMW only	-	-	-	-	-	-	+	-	+
361	Q86Y38	Xylosyltransferase 1	HMW only	HMW only	-	-	-	+	+	+	-	-	+
362	Q01459	Di-N-acetylchitobiase	HMW only	HMW only	+	-	-	+	-	+	-	+	+
363	Q92496	Complement factor H-related protein 4	HMW only	HMW only	+	-	-	-	-	-	+	+	+
364	P19338	Nucleolin	HMW only	HMW only	+	-	+	+	-	-	-	+	+
365	Q6P179	Endoplasmic reticulum aminopeptidase 2	HMW only	HMW only	+	-	-	+	-	-	-	-	+
366	Q6EMK4	Vasorin	HMW only	HMW only	+	-	+	+	+	+	+	-	+
367	P05362	Intercellular adhesion molecule 1	HMW only	HMW only	+	+	+	+	+	+	-	-	+
368	P57053	Histone H2B type F-S	HMW only	-	-	-	+	-	-	-	-	-	-
369	Q9H361	Polyadenylate-binding protein 3	HMW only	-	+	-	+	-	-	-	-	-	+
370	P29401	Transketolase	HMW only	HMW only	+	+	+	+	-	+	-	-	+
371	P09529	Inhibin beta B chain	HMW only	HMW only	-	-	-	+	+	+	-	+	+
372	P78417	Glutathione S-transferase omega-1	HMW only	HMW only	+	-	+	+	+	+	-	+	+
373	P60660	Myosin light polypeptide 6	HMW only	HMW only	+	-	+	+	-	-	-	+	+
374	A0A0B4J1Y8	Immunoglobulin lambda variable 9-49	HMW only	HMW only	-	-	-	-	-	-	+	+	+
375	A0A087WSZ0	Immunoglobulin kappa variable 1D-8	HMW only	HMW only	-	-	-	-	-	-	-	+	+
376	A0A0C4DH29	Immunoglobulin heavy variable 1-3	HMW only	HMW only	-	-	-	-	-	-	+	+	+
377	P69892	Hemoglobin subunit gamma-2	HMW only	-	+	-	-	-	-	-	-	-	-
378	A0A0A0MS14	Immunoglobulin heavy variable 1-45	HMW only	HMW only	-	-	-	-	-	-	+	+	+
379	Q15323	Keratin, type I cuticular Ha1	HMW only	HMW only	+	-	-	-	-	+	-	-	+
380	P25391	Laminin subunit alpha-1	HMW only	HMW only	+	-	-	+	+	+	-	+	+
381	Q76LX8	A disintegrin and metalloproteinase with thrombospondin motifs 13	HMW only	HMW only	+	-	-	+	+	+	-	+	+
382	P36578	60S ribosomal protein L4	HMW only	-	+	-	+	-	-	-	-	+	+
383	P0DMR1	Heterogeneous nuclear ribonucleoprotein C-like 4	HMW only	-	-	-	+	-	-	-	-	-	-
384	Q14697	Neutral alpha-glucosidase AB	HMW only	HMW only	+	+	+	+	-	+	-	+	+
385	Q16394	Exostosin-1	HMW only	HMW only	+	-	-	+	-	+	-	+	+
386	P23528	Cofilin-1	HMW only	HMW only	+	-	+	+	-	-	-	+	+
387	Q13228	Methanethiol oxidase	HMW only	HMW only	+	-	-	-	-	+	-	+	+
388	P27797	Calreticulin	HMW only	HMW only	+	+	+	+	-	+	-	+	+
389	P05387	60S acidic ribosomal protein P2	HMW only	HMW only	+	+	+	+	-	-	-	+	+
390	P08865	40S ribosomal protein SA	HMW only	HMW only	+	+	+	+	-	-	-	+	+
391	P08294	Extracellular superoxide dismutase [Cu-Zn]	HMW only	HMW only	+	-	-	+	+	+	-	+	+
392	Q99497	Protein/nucleic acid deglycase DJ-1	HMW only	HMW only	+	+	+	+	-	+	-	+	+
393	P01814	Immunoglobulin heavy variable 2-70	HMW only	HMW only	-	-	-	-	-	-	-	-	-
394	P34096	Ribonuclease 4	HMW only	HMW only	+	-	-	+	-	+	-	+	+
395	P31949	Protein S100-A11	HMW only	HMW only	+	-	+	+	-	-	+	+	+
396	P59666	Neutrophil defensin 3	HMW only	HMW only	-	-	-	+	+	+	-	+	-
397	Q9BUN1	Protein MENT	HMW only	HMW only	-	-	-	-	-	-	-	-	+
398	P00390	Glutathione reductase, mitochondrial	HMW only	HMW only	+	+	+	+	-	+	-	-	+
399	Q99969	Retinoic acid receptor responder protein 2	HMW only	HMW only	+	+	-	+	+	+	+	+	+
400	P98066	Tumor necrosis factor-inducible gene 6 protein	HMW only	HMW only	+	-	-	+	+	+	+	+	-
401	Q5SZK8	FRAS1-related extracellular matrix protein 2	HMW only	HMW only	-	-	-	+	+	+	-	+	-
402	P14174	Macrophage migration inhibitory factor	HMW only	HMW only	+	-	+	-	+	-	-	+	+
403	Q15233	Non-POU domain-containing octamer-binding protein	HMW only	-	+	-	+	-	-	-	-	+	+
404	P08253	72 kDa type IV collagenase	HMW only	HMW only	+	-	-	+	+	+	-	+	+
405	P07585	Decorin	HMW only	HMW only	+	-	-	+	+	+	-	+	+
406	Q9Y5Y7	Lymphatic vessel endothelial hyaluronic acid receptor 1	HMW only	HMW only	+	-	-	+	+	+	+	-	+
407	Q99878	Histone H2A type 1-J	HMW only	HMW only	-	-	+	-	-	+	-	-	-
408	P30101	Protein disulfide-isomerase A3	HMW only	HMW only	+	+	+	+	-	+	-	+	+
409	Q86U17	Serpin A11	HMW only	HMW only	+	-	-	+	-	+	+	+	+
410	P13727	Bone marrow proteoglycan	HMW only	-	+	-	-	+	-	+	-	-	+
411	P83110	Serine protease HTRA3	HMW only	HMW only	+	-	+	+	-	+	-	+	-
412	Q15485	Ficolin-2	HMW only	HMW only	+	-	-	-	+	-	+	+	+
413	P62805	Histone H4	HMW only	+	+	-	+	+	-	+	+	+	+
414	P13473	Lysosome-associated membrane glycoprotein 2	HMW only	HMW only	+	-	+	+	+	+	-	-	+
415	Q02818	Nucleobindin-1	HMW only	HMW only	+	-	+	+	-	+	-	+	+
416	O95479	GDH/6PGL endoplasmic bifunctional protein	HMW only	HMW only	+	-	+	+	-	+	-	-	+
417	P15291	Beta-1,4-galactosyltransferase 1	HMW only	HMW only	+	-	+	+	-	+	-	-	+
418	Q13103	Secreted phosphoprotein 24	HMW only	HMW only	+	-	-	+	+	+	+	+	+
419	P30041	Peroxiredoxin-6	HMW only	HMW only	+	+	+	+	-	-	+	+	+
420	Q14515	SPARC-like protein 1	HMW only	HMW only	+	-	-	+	-	+	-	+	+
421	P23284	Peptidyl-prolyl cis-trans isomerase B	HMW only	HMW only	+	+	+	-	+	+	-	+	+
422	A0A0B4J1X5	Immunoglobulin heavy variable 3-74	HMW only	HMW only	-	-	-	-	-	-	+	+	+
423	P27487	Dipeptidyl peptidase 4	HMW only	HMW only	+	-	+	-	-	+	-	-	+
424	Q06830	Peroxiredoxin-1	HMW only	HMW only	+	+	+	+	+	+	+	+	+
425	P02533	Keratin, type I cytoskeletal 14	HMW only	HMW only	+	-	+	+	+	+	+	-	+
426	P54108	Cysteine-rich secretory protein 3	HMW only	HMW only	+	-	-	+	+	+	+	-	+
427	P03950	Angiogenin	HMW only	HMW only	+	-	-	+	+	+	+	+	+
428	P11413	Glucose-6-phosphate 1-dehydrogenase	HMW only	HMW only	+	-	+	-	-	-	-	+	+
429	P14324	Farnesyl pyrophosphate synthase	HMW only	HMW only	+	-	+	+	-	-	-	+	+
430	P04040	Catalase	HMW only	HMW only	+	+	+	+	+	+	+	+	+
431	P39060	Collagen alpha-1(XVIII) chain	HMW only	HMW only	+	-	-	+	+	+	-	+	+
432	Q10588	ADP-ribosyl cyclase/cyclic ADP-ribose hydrolase 2	HMW only	HMW only	+	-	-	+	+	+	-	-	+
433	P31431	Syndecan-4	HMW only	HMW only	+	-	+	+	+	+	-	-	+
434	P68371	Tubulin beta-4B chain	HMW only	-	+	+	+	-	-	-	-	+	+
435	P20851	C4b-binding protein beta chain	HMW only	HMW only	+	-	-	-	-	-	-	+	+
436	P48506	Glutamate--cysteine ligase catalytic subunit	HMW only	HMW only	+	+	+	+	-	-	-	-	+
437	P0DP25	Calmodulin-3	HMW only	HMW only	-	-	+	+	-	-	-	+	+
438	Q6YHK3	CD109 antigen	HMW only	HMW only	+	-	-	+	-	+	-	+	+
439	Q02790	Peptidyl-prolyl cis-trans isomerase FKBP4	HMW only	-	+	+	+	-	-	-	-	-	+
440	Q12905	Interleukin enhancer-binding factor 2	HMW only	HMW only	+	-	+	+	-	-	-	+	+
441	A0A0B4J1X8	Immunoglobulin heavy variable 3-43	HMW only	HMW only	-	-	-	-	-	-	+	+	+
442	P51665	26S proteasome non-ATPase regulatory subunit 7	HMW only	-	+	-	+	+	-	-	-	-	+
443	P06331	Immunoglobulin heavy variable 4-34	HMW only	HMW only	-	-	-	-	-	+	+	-	+
444	P08637	Low affinity immunoglobulin gamma Fc region receptor III-A	HMW only	HMW only	+	-	-	+	-	+	+	-	+
445	Q12860	Contactin-1	HMW only	HMW only	+	-	-	+	+	+	-	-	+
446	A0A075B6K4	Immunoglobulin lambda variable 3-10	HMW only	HMW only	-	-	-	-	-	-	+	+	+
447	P16070	CD44 antigen	HMW only	HMW only	+	-	+	+	+	+	+	-	+
448	P18669	Phosphoglycerate mutase 1	HMW only	HMW only	+	+	+	+	-	+	-	-	+
449	P22676	Calretinin	HMW only	HMW only	+	-	+	+	-	-	-	-	+
450	P07998	Ribonuclease pancreatic	HMW only	HMW only	+	-	-	+	-	-	+	+	+
451	O14727	Apoptotic protease-activating factor 1	HMW only	-	+	-	-	-	-	-	-	-	-
452	A0M8Q6	Immunoglobulin lambda constant 7	HMW only	HMW only	-	-	-	-	-	-	+	-	+
453	Q9HCB6	Spondin-1	HMW only	HMW only	+	-	-	+	-	+	-	+	+
454	P06744	Glucose-6-phosphate isomerase	HMW only	HMW only	+	+	+	+	-	+	-	-	+
455	P10721	Mast/stem cell growth factor receptor Kit	HMW only	HMW only	+	-	-	+	-	+	-	-	+
456	P14061	Estradiol 17-beta-dehydrogenase 1	HMW only	-	+	-	+	-	-	-	-	+	+
457	Q86UD1	Out at first protein homolog	HMW only	HMW only	+	-	-	+	-	+	+	+	+
458	A0A0B4J1V1	Immunoglobulin heavy variable 3-21	HMW only	-	-	-	-	-	-	-	-	-	+
459	P15814	Immunoglobulin lambda-like polypeptide 1	HMW only	HMW only	+	-	-	-	-	-	+	+	+
460	P07942	Laminin subunit beta-1	HMW only	HMW only	+	-	+	+	-	+	-	+	+
461	P40227	T-complex protein 1 subunit zeta	HMW only	HMW only	+	-	+	+	-	-	-	+	+
462	P61978	Heterogeneous nuclear ribonucleoprotein K	HMW only	-	+	+	+	+	-	-	-	+	+
463	P17174	Aspartate aminotransferase, cytoplasmic	HMW only	HMW only	+	+	+	+	-	+	-	-	+
464	Q14103	Heterogeneous nuclear ribonucleoprotein D0	HMW only	HMW only	+	+	+	-	-	-	-	+	+
465	Q13361	Microfibrillar-associated protein 5	HMW only	-	+	-	-	-	-	-	-	+	-
466	P01763	Immunoglobulin heavy variable 3-48	HMW only	-	-	-	-	-	-	+	-	-	+
467	A0A0C4DH67	Immunoglobulin kappa variable 1-8	HMW only	HMW only	-	-	-	-	-	-	+	+	+
468	A0A0B4J2H0	Immunoglobulin heavy variable 1-69D	HMW only	HMW only	-	-	-	-	-	-	+	-	+
469	A0A0C4DH24	Immunoglobulin kappa variable 6-21	HMW only	HMW only	-	-	-	-	-	-	+	-	+
470	P01889	HLA class I histocompatibility antigen, B alpha chain	HMW only	-	+	-	+	-	-	+	-	+	+
471	P69891	Hemoglobin subunit gamma-1	HMW only	HMW only	+	-	-	-	-	-	+	-	+
472	P0DJI9	Serum amyloid A-2 protein	HMW only	HMW only	-	-	-	-	+	-	+	-	+
473	P31946	14-3-3 protein beta/alpha	HMW only	HMW only	+	+	+	+	-	-	-	+	+
474	P61981	14-3-3 protein gamma	HMW only	HMW only	+	+	+	+	+	-	-	+	+
475	Q04695	Keratin, type I cytoskeletal 17	HMW only	-	+	-	+	+	-	+	-	-	+
476	Q02224	Centromere-associated protein E	HMW only	-	+	+	-	-	-	-	-	-	-
477	E9PAV3	Nascent polypeptide-associated complex subunit alpha, muscle-specific form	HMW only	-	-	+	+	-	-	-	-	-	+
478	Q5THK1	Protein PRR14L	HMW only	-	-	-	-	-	-	-	-	-	-
479	P46940	Ras GTPase-activating-like protein IQGAP1	HMW only	HMW only	+	-	+	-	-	-	-	+	+
480	Q92954	Proteoglycan 4	HMW only	HMW only	+	-	-	+	-	+	-	+	+
481	Q8N283	Ankyrin repeat domain-containing protein 35	HMW only	-	+	-	-	-	-	-	-	-	-
482	P18206	Vinculin	HMW only	HMW only	+	+	+	+	-	+	-	+	+
483	P23470	Receptor-type tyrosine-protein phosphatase gamma	HMW only	HMW only	+	-	+	+	-	+	-	-	+
484	Q8NDV3	Structural maintenance of chromosomes protein 1B	HMW only	-	+	-	-	-	-	-	-	-	-
485	O75339	Cartilage intermediate layer protein 1	HMW only	HMW only	-	-	-	-	-	+	-	+	+
486	P49588	Alanine--tRNA ligase, cytoplasmic	HMW only	-	+	+	+	-	-	-	-	-	+
487	P04275	von Willebrand factor	HMW only	HMW only	+	-	-	+	+	+	-	+	+
488	Q86VP6	Cullin-associated NEDD8-dissociated protein 1	HMW only	-	+	-	+	+	-	-	-	+	+
489	H7BZ55	Putative ciliary rootlet coiled-coil protein 2	HMW only	-	-	-	-	-	-	-	-	-	-
490	O00533	Neural cell adhesion molecule L1-like protein	HMW only	HMW only	+	-	+	+	+	+	-	-	+
491	P30153	Serine/threonine-protein phosphatase 2A 65 kDa regulatory subunit A alpha isoform	HMW only	-	+	-	+	+	-	-	-	+	+
492	O95428	Papilin	HMW only	-	+	-	-	-	-	-	-	+	+
493	P10809	60 kDa heat shock protein, mitochondrial	HMW only	HMW only	+	+	+	+	-	-	-	+	+
494	Q9BZ29	Dedicator of cytokinesis protein 9	HMW only	-	+	-	-	-	-	-	-	-	-
495	Q8IWY4	Signal peptide, CUB and EGF-like domain-containing protein 1	HMW only	HMW only	-	-	-	+	+	+	-	+	+
496	Q02809	Procollagen-lysine,2-oxoglutarate 5-dioxygenase 1	HMW only	HMW only	+	-	+	+	-	-	-	+	+
497	O43390	Heterogeneous nuclear ribonucleoprotein R	HMW only	HMW only	+	-	+	+	-	-	-	+	+
498	Q6UY14	ADAMTS-like protein 4	HMW only	HMW only	-	-	-	+	-	+	-	+	+
499	O60506	Heterogeneous nuclear ribonucleoprotein Q	HMW only	-	+	-	+	+	-	-	-	+	+
500	P50454	Serpin H1	HMW only	-	+	-	+	-	-	-	-	+	+
501	P05067	Amyloid-beta precursor protein	HMW only	HMW only	+	+	+	+	+	+	-	+	+
502	P54802	Alpha-N-acetylglucosaminidase	HMW only	HMW only	+	-	+	+	+	+	-	+	+
503	P50990	T-complex protein 1 subunit theta	HMW only	-	+	+	+	-	-	-	-	+	+
504	P01130	Low-density lipoprotein receptor	HMW only	HMW only	+	-	+	+	-	+	-	+	+
505	P19022	Cadherin-2	HMW only	HMW only	+	+	+	+	-	+	-	-	+
506	O95340	Bifunctional 3'-phosphoadenosine 5'-phosphosulfate synthase 2	HMW only	-	+	-	+	-	-	-	-	+	-
507	Q99832	T-complex protein 1 subunit eta	HMW only	-	+	-	+	-	-	-	-	+	+
508	Q93063	Exostosin-2	HMW only	HMW only	+	-	-	+	-	+	-	+	+
509	P63162	Small nuclear ribonucleoprotein-associated protein N	HMW only	-	+	-	+	-	-	-	-	-	-
510	P38606	V-type proton ATPase catalytic subunit A	HMW only	-	+	+	+	-	-	-	-	-	-
511	Q96E39	RNA binding motif protein, X-linked-like-1	HMW only	-	-	-	+	-	-	-	-	-	-
512	Q8WY36	HMG box transcription factor BBX	HMW only	-	+	-	-	-	-	-	-	-	-
513	Q8IZ52	Chondroitin sulfate synthase 2	HMW only	-	+	-	+	-	-	+	-	+	-
514	P52209	6-phosphogluconate dehydrogenase, decarboxylating	HMW only	HMW only	+	+	+	+	-	-	-	+	+
515	Q69YZ2	Transmembrane protein 200B	HMW only	-	-	-	-	-	-	-	-	-	-
516	P12277	Creatine kinase B-type	HMW only	HMW only	+	+	+	+	-	-	-	+	+
517	O75023	Leukocyte immunoglobulin-like receptor subfamily B member 5	HMW only	-	+	-	-	+	-	+	-	-	+
518	Q6E0U4	Dermokine	HMW only	-	+	-	-	-	-	-	-	-	+
519	Q13838	Spliceosome RNA helicase DDX39B	HMW only	HMW only	+	-	+	+	-	-	-	+	+
520	P07359	Platelet glycoprotein Ib alpha chain	HMW only	HMW only	+	-	-	+	-	+	-	-	+
521	Q99536	Synaptic vesicle membrane protein VAT-1 homolog	HMW only	LMW only	+	+	+	+	-	-	-	+	+
522	Q96AG4	Leucine-rich repeat-containing protein 59	HMW only	-	-	+	+	+	-	-	-	-	-
523	Q15365	Poly(rC)-binding protein 1	HMW only	-	+	+	+	+	-	-	-	+	+
524	P07355	Annexin A2	HMW only	HMW only	+	+	+	+	-	+	+	-	+
525	Q9BRK5	45 kDa calcium-binding protein	HMW only	HMW only	+	-	+	+	-	+	-	+	+
526	Q92743	Serine protease HTRA1	HMW only	HMW only	+	oocyte specific	+	-	-	-	-	+	+
527	Q15366	Poly(rC)-binding protein 2	HMW only	-	+	+	+	-	-	-	-	+	+
528	P10912	Growth hormone receptor	HMW only	HMW only	+	-	-	+	-	-	-	-	+
529	P00491	Purine nucleoside phosphorylase	HMW only	HMW only	+	-	+	+	-	-	+	-	+
530	O00299	Chloride intracellular channel protein 1	HMW only	HMW only	+	-	+	+	-	-	-	+	+
531	Q9H3U7	SPARC-related modular calcium-binding protein 2	HMW only	-	+	-	-	-	-	+	-	+	+
532	Q93070	Ecto-ADP-ribosyltransferase 4	HMW only	HMW only	+	-	-	+	+	-	-	-	+
533	P61158	Actin-related protein 3	HMW only	HMW only	+	+	+	-	-	-	-	-	+
534	P43487	Ran-specific GTPase-activating protein	HMW only	-	+	+	+	-	-	-	-	+	+
535	O60687	Sushi repeat-containing protein SRPX2	HMW only	HMW only	-	-	-	+	+	+	-	+	-
536	P43121	Cell surface glycoprotein MUC18	HMW only	HMW only	+	-	+	+	-	+	-	-	+
537	P09917	Arachidonate 5-lipoxygenase	HMW only	-	+	-	-	-	-	-	-	-	-
538	Q9UJJ9	N-acetylglucosamine-1-phosphotransferase subunit gamma	HMW only	HMW only	+	-	-	+	+	+	-	+	+
539	Q9BVK6	Transmembrane emp24 domain-containing protein 9	HMW only	-	-	+	+	-	-	-	-	-	-
540	Q92520	Protein FAM3C	HMW only	-	+	+	+	-	-	-	-	-	+
541	P37802	Transgelin-2	HMW only	HMW only	+	+	+	+	-	-	-	-	+
542	Q9HA72	Calcium homeostasis modulator protein 2	HMW only	-	-	-	-	-	-	-	-	-	-
543	Q96EE4	Coiled-coil domain-containing protein 126	HMW only	-	+	-	-	+	-	-	-	-	+
544	P15514	Amphiregulin	HMW only	HMW only	+	-	+	+	+	+	+	+	-
545	P00441	Superoxide dismutase [Cu-Zn]	HMW only	HMW only	+	+	+	+	+	+	+	-	+
546	Q96FQ6	Protein S100-A16	HMW only	HMW only	-	-	+	-	-	-	-	-	+
547	P46778	60S ribosomal protein L21	HMW only	-	-	-	+	-	-	-	-	-	-
548	P02794	Ferritin heavy chain	HMW only	-	+	-	+	-	+	+	-	+	+
549	P02144	Myoglobin	HMW only	-	+	-	-	+	-	-	-	-	+
550	Q9UKZ9	Procollagen C-endopeptidase enhancer 2	HMW only	-	+	-	-	+	-	-	-	+	-
551	Q9H0W9	Ester hydrolase C11orf54	HMW only	-	+	-	+	-	-	-	-	-	+
552	Q15102	Platelet-activating factor acetylhydrolase IB subunit gamma	HMW only	-	+	+	+	-	-	-	-	-	+
553	P46782	40S ribosomal protein S5	HMW only	-	+	+	+	-	-	-	-	+	+
554	P20774	Mimecan	HMW only	+	+	-	-	+	+	+	-	+	+
555	P00492	Hypoxanthine-guanine phosphoribosyltransferase	HMW only	HMW only	+	+	+	+	-	-	-	-	+
556	O95336	6-phosphogluconolactonase	HMW only	-	+	+	+	-	-	-	-	-	+
557	Q9UBX5	Fibulin-5	HMW only	-	+	-	-	-	-	-	-	+	+
558	Q14376	UDP-glucose 4-epimerase	HMW only	-	-	-	-	-	-	-	-	-	+
559	P62826	GTP-binding nuclear protein Ran	HMW only	-	+	-	+	+	-	-	-	+	+
560	P24592	Insulin-like growth factor-binding protein 6	HMW only	HMW only	+	+	-	+	-	+	-	+	+
561	P11279	Lysosome-associated membrane glycoprotein 1	HMW only	HMW only	+	+	+	+	-	+	-	-	+
562	P07339	Cathepsin D	HMW only	HMW only	+	+	+	+	+	+	-	+	+
563	O95084	Serine protease 23	HMW only	HMW only	+	-	-	+	-	+	-	+	+
564	Q15813	Tubulin-specific chaperone E	HMW only	-	-	-	+	-	-	-	-	-	-
565	P14209	CD99 antigen	HMW only	+	+	-	+	-	-	-	-	+	+
566	P05019	Insulin-like growth factor I	HMW only	HMW only	+	-	-	+	+	+	+	+	+
567	P61224	Ras-related protein Rap-1b	HMW only	-	+	+	+	-	-	-	-	-	+
568	P10720	Platelet factor 4 variant	HMW only	-	+	-	-	+	-	-	-	+	-
569	P05413	Fatty acid-binding protein, heart	HMW only	HMW only	+	-	+	-	-	-	-	-	+
570	O75144	ICOS ligand	HMW only	HMW only	+	-	-	+	-	-	-	-	+
571	P52565	Rho GDP-dissociation inhibitor 1	HMW only	HMW only	+	-	+	+	-	-	-	-	+
572	P49773	Histidine triad nucleotide-binding protein 1	HMW only	HMW only	+	+	+	-	-	-	-	-	+
573	P10599	Thioredoxin	HMW only	HMW only	+	-	+	+	+	+	+	+	+
574	Q6ZQY2	Leucine-rich repeat-containing protein 74B	HMW only	-	-	-	-	-	-	-	-	-	-
575	P10124	Serglycin	HMW only	+	+	-	-	+	-	+	-	+	-
576	P62857	40S ribosomal protein S28	HMW only	-	+	-	+	+	-	-	-	-	+
577	P02775	Platelet basic protein	HMW only	HMW only	+	-	-	+	-	-	-	+	+
578	P60985	Keratinocyte differentiation-associated protein	HMW only	LMW only	+	-	-	-	-	-	-	+	-
579	P41159	Leptin	HMW only	-	+	-	-	+	+	-	-	+	-
580	Q9NTK5	Obg-like ATPase 1	HMW only	HMW only	+	-	+	+	-	-	-	-	+
581	Q9UQ80	Proliferation-associated protein 2G4	HMW only	-	+	-	+	+	-	-	-	-	+
582	O43488	Aflatoxin B1 aldehyde reductase member 2	HMW only	-	+	+	+	-	-	-	-	-	+
583	Q9UBQ6	Exostosin-like 2	HMW only	HMW only	+	-	-	+	+	+	-	+	+
584	Q12913	Receptor-type tyrosine-protein phosphatase eta	HMW only	HMW only	+	-	-	+	-	+	-	-	+
585	O43852	Calumenin	HMW only	-	+	+	+	+	-	+	-	+	+
586	Q7Z7G1	Cytokine-dependent hematopoietic cell linker	HMW only	-	+	-	-	-	-	-	-	-	-
587	P40189	Interleukin-6 receptor subunit beta	HMW only	HMW only	+	-	+	+	+	+	-	-	+
588	P22626	Heterogeneous nuclear ribonucleoproteins A2/B1	HMW only	+	+	+	+	+	-	-	-	+	+
589	P32969	60S ribosomal protein L9	HMW only	-	+	+	+	-	-	-	-	+	+
590	Q16769	Glutaminyl-peptide cyclotransferase	HMW only	HMW only	+	-	-	-	-	-	-	+	-
591	P24158	Myeloblastin	HMW only	-	+	-	-	-	-	-	-	+	-
592	P35555	Fibrillin-1	HMW only	+	+	-	+	+	+	-	-	+	+
593	Q9UBP4	Dickkopf-related protein 3	HMW only	HMW only	+	-	-	+	-	+	-	+	+
594	O60704	Protein-tyrosine sulfotransferase 2	HMW only	-	+	-	-	-	-	-	-	-	-
595	P01709	Immunoglobulin lambda variable 2-8	HMW only	-	-	-	-	-	-	-	+	+	+
596	P35579	Myosin-9	HMW only	+	+	+	+	+	-	-	-	+	+
597	Q03001	Dystonin	HMW only	-	+	-	+	-	+	-	-	-	+
598	Q6UXH8	Collagen and calcium-binding EGF domain-containing protein 1	HMW only	+	+	-	-	-	+	+	-	+	+
599	P05204	Non-histone chromosomal protein HMG-17	HMW only	LMW only	+	-	-	-	-	-	-	-	+
600	Q9UBR1	Beta-ureidopropionase	HMW only	-	+	-	-	-	-	-	-	-	-
601	P05121	Plasminogen activator inhibitor 1	HMW only	HMW only	+	-	-	+	+	+	+	+	+
602	P36222	Chitinase-3-like protein 1	HMW only	-	+	-	-	+	-	+	-	-	+
603	P07949	Proto-oncogene tyrosine-protein kinase receptor Ret	HMW only	-	+	-	-	-	-	-	-	-	-
604	P58166	Inhibin beta E chain	HMW only	-	+	-	-	-	-	-	-	+	-
605	Q86UN3	Reticulon-4 receptor-like 2	HMW only	HMW only	+	-	-	+	-	-	-	-	+
606	Q6P0N0	Mis18-binding protein 1	HMW only	-	-	-	-	-	-	-	-	-	-
607	O75015	Low affinity immunoglobulin gamma Fc region receptor III-B	HMW only	HMW only	+	-	-	+	-	+	-	-	+
608	A6NC57	Ankyrin repeat domain-containing protein 62	HMW only	-	-	-	-	-	-	-	-	-	-
609	Q9Y624	Junctional adhesion molecule A	HMW only	-	+	-	+	-	-	-	-	-	+
610	Q9Y4L1	Hypoxia up-regulated protein 1	HMW only	HMW only	+	+	+	+	+	+	-	+	+
611	P10646	Tissue factor pathway inhibitor	HMW only	+	+	-	-	+	+	+	-	+	+
612	P09651	Heterogeneous nuclear ribonucleoprotein A1	HMW only	+	+	+	+	+	-	-	-	+	+
613	P16435	NADPH--cytochrome P450 reductase	HMW only	-	+	-	+	-	-	-	-	-	-
614	O60641	Clathrin coat assembly protein AP180	HMW only	-	+	-	-	-	-	-	-	-	-
615	Q9ULE4	Protein FAM184B	HMW only	-	-	-	+	-	-	-	-	-	-
616	Q6UWH4	Golgi-associated kinase 1B	HMW only	HMW only	-	-	+	+	-	+	-	+	+
617	O15467	C-C motif chemokine 16	HMW only	-	+	-	-	-	-	-	-	+	-
618	O75369	Filamin-B	HMW only	-	+	+	+	+	-	-	-	+	+
619	Q9H0A0	RNA cytidine acetyltransferase	HMW only	-	+	-	+	-	-	-	-	-	-
620	Q92688	Acidic leucine-rich nuclear phosphoprotein 32 family member B	HMW only	HMW only	+	-	+	-	-	-	-	+	+
621	P35609	Alpha-actinin-2	HMW only	-	+	-	-	-	-	-	-	-	+
622	P81605	Dermcidin	HMW only	+	+	+	+	+	+	+	-	+	+
623	Q7Z7M0	Multiple epidermal growth factor-like domains protein 8	HMW only	+	+	-	-	+	-	+	-	-	+
624	A8MPP1	Putative ATP-dependent RNA helicase DDX11-like protein 8	HMW only	-	-	-	-	-	-	-	-	-	-
625	P04792	Heat shock protein beta-1	HMW only	HMW only	+	+	+	-	-	+	+	+	+
626	Q14126	Desmoglein-2	HMW only	HMW only	+	-	-	+	+	+	-	-	+
627	P16402	Histone H1.3	HMW only	LMW only	-	-	+	-	-	-	-	-	+
628	Q13907	Isopentenyl-diphosphate Delta-isomerase 1	HMW only	HMW only	+	+	+	+	-	-	-	-	+
629	Q12841	Follistatin-related protein 1	HMW only	HMW only	+	-	+	+	-	+	-	+	+
630	Q9Y266	Nuclear migration protein nudC	HMW only	-	-	+	+	-	-	-	-	-	+
631	Q16695	Histone H3.1t	HMW only	-	-	-	+	-	-	-	-	-	+
632	P24043	Laminin subunit alpha-2	HMW only	HMW only	+	-	-	+	-	+	-	+	+
633	Q9Y4C2	TRPM8 channel-associated factor 1	HMW only	-	+	-	+	-	-	-	-	-	-
634	Q9Y2E4	Disco-interacting protein 2 homolog C	HMW only	-	+	-	-	-	-	-	-	-	-
635	Q8N0Z3	Spindle and centriole-associated protein 1	HMW only	-	-	-	-	-	-	-	-	-	-
636	P53634	Dipeptidyl peptidase 1	HMW only	HMW only	+	-	+	-	-	-	-	+	+
637	P07951	Tropomyosin beta chain	HMW only	-	+	-	-	-	-	-	-	-	+
638	P39019	40S ribosomal protein S19	HMW only	-	+	-	+	-	-	-	-	+	+
639	O95980	Reversion-inducing cysteine-rich protein with Kazal motifs	HMW only	-	+	-	-	+	-	-	-	-	+
640	P25398	40S ribosomal protein S12	HMW only	-	+	+	+	-	-	-	-	+	+
641	P78386	Keratin, type II cuticular Hb5	HMW only	-	+	-	-	+	-	-	-	-	+
642	P68402	Platelet-activating factor acetylhydrolase IB subunit beta	HMW only	-	-	+	+	+	-	-	-	-	+
643	P02461	Collagen alpha-1(III) chain	HMW only	+	+	-	-	+	+	+	-	-	+
644	P08670	Vimentin	HMW only	+	+	+	+	-	+	-	-	+	+
645	Q9Y646	Carboxypeptidase Q	HMW only	-	+	-	+	+	-	+	-	+	+
646	Q13190	Syntaxin-5	HMW only	-	+	-	+	-	-	-	-	-	-
647	P16035	Metalloproteinase inhibitor 2	HMW only	HMW only	+	+	-	+	+	+	-	-	+
648	P07858	Cathepsin B	HMW only	HMW only	+	-	+	+	+	+	-	+	+
649	Q9H799	Ciliogenesis and planar polarity effector 1	HMW only	-	-	-	-	-	-	-	-	-	-
650	P24387	Corticotropin-releasing factor-binding protein	HMW only	-	+	-	-	-	-	-	-	+	+
651	P08123	Collagen alpha-2(I) chain	HMW only	HMW only	+	-	-	+	+	+	-	+	+
652	Q99996	A-kinase anchor protein 9	HMW only	-	+	-	-	-	-	-	-	-	+
653	O75083	WD repeat-containing protein 1	HMW only	HMW only	+	+	+	-	-	-	-	+	+
654	Q9ULD2	Microtubule-associated tumor suppressor 1	HMW only	-	-	-	-	-	-	-	-	-	-
655	Q03167	Transforming growth factor beta receptor type 3	HMW only	HMW only	+	-	+	+	+	+	-	+	+
656	P49913	Cathelicidin antimicrobial peptide	HMW only	-	+	-	-	-	-	-	+	+	+
657	Q7Z6Z7	E3 ubiquitin-protein ligase HUWE1	HMW only	HMW only	+	+	+	+	+	-	-	+	+
658	A0A0C4DH34	Immunoglobulin heavy variable 4-28	HMW only	HMW only	-	-	-	-	-	-	+	+	+
659	O43240	Kallikrein-10	HMW only	-	+	-	-	-	-	-	-	-	-
660	O96017	Serine/threonine-protein kinase Chk2	HMW only	-	+	-	-	-	-	-	-	-	-
661	Q2VIR3	Eukaryotic translation initiation factor 2 subunit 3B	HMW only	-	-	-	+	-	-	-	-	-	-
662	P31150	Rab GDP dissociation inhibitor alpha	HMW only	-	+	+	+	+	-	+	-	-	+
663	Q02878	60S ribosomal protein L6	HMW only	LMW only	+	-	+	-	-	-	-	+	+
664	Q9NRC8	NAD-dependent protein deacetylase sirtuin-7	HMW only	-	+	-	-	-	-	-	-	-	-
665	Q9NYF0	Dapper homolog 1	HMW only	-	+	-	-	-	-	-	-	-	-
666	P00918	Carbonic anhydrase 2	HMW only	HMW only	+	-	-	+	-	+	+	-	+
667	Q02040	A-kinase anchor protein 17A	HMW only	-	+	-	-	-	-	-	-	-	-
668	Q5HY92	Fidgetin	HMW only	-	-	-	-	-	-	-	-	-	-
669	Q96S96	Phosphatidylethanolamine-binding protein 4	HMW only	HMW only	+	-	-	+	+	+	-	-	+
670	P11511	Aromatase	HMW only	HMW only	+	-	+	-	-	-	-	-	-
671	Q9BRD0	BUD13 homolog	HMW only	-	-	-	-	-	-	-	-	-	-
672	P00966	Argininosuccinate synthase	HMW only	-	+	-	+	-	-	-	-	+	+
673	P61586	Transforming protein RhoA	HMW only	HMW only	-	+	+	-	-	-	-	+	+
674	O00231	26S proteasome non-ATPase regulatory subunit 11	HMW only	-	+	+	+	-	-	-	-	+	+
675	O75069	Transmembrane and coiled-coil domains protein 2	HMW only	-	+	-	-	-	-	-	-	-	-
676	Q8IZQ8	Myocardin	HMW only	-	+	-	-	-	-	-	-	-	-
677	Q96L21	60S ribosomal protein L10-like	HMW only	-	-	-	-	-	-	-	-	-	-
678	Q71U36	Tubulin alpha-1A chain	HMW only	LMW only	+	-	+	-	-	+	-	+	+
679	P02788	Lactotransferrin	HMW only	HMW only	+	+	-	+	+	+	+	+	+
680	Q13740	CD166 antigen	HMW only	HMW only	+	-	+	+	-	+	-	-	+
681	P07900	Heat shock protein HSP 90-alpha	HMW only	HMW only	+	+	+	+	+	-	-	+	+
682	P54289	Voltage-dependent calcium channel subunit alpha-2/delta-1	HMW only	HMW only	+	-	+	+	-	+	-	-	+
683	P40925	Malate dehydrogenase, cytoplasmic	HMW only	HMW only	+	+	+	+	+	-	-	-	+
684	Q16706	Alpha-mannosidase 2	HMW only	HMW only	+	-	+	+	-	+	-	-	+
685	P68104	Elongation factor 1-alpha 1	HMW only	-	+	+	+	-	-	+	-	-	+
686	P55290	Cadherin-13	HMW only	HMW only	+	-	-	+	+	+	-	-	+
687	P35241	Radixin	HMW only	HMW only	+	+	+	+	-	+	-	+	+
688	P02452	Collagen alpha-1(I) chain	HMW only	+	+	-	+	+	+	+	+	+	+
689	P12830	Cadherin-1	HMW only	HMW only	+	-	-	+	-	+	-	+	+
690	P22692	Insulin-like growth factor-binding protein 4	HMW only	HMW only	+	-	-	+	+	+	+	+	+
691	P35052	Glypican-1	HMW only	HMW only	+	-	+	+	-	+	-	-	+
692	Q01581	Hydroxymethylglutaryl-CoA synthase, cytoplasmic	HMW only	HMW only	+	-	+	+	-	-	-	+	+
693	Q16853	Membrane primary amine oxidase	HMW only	HMW only	+	-	-	+	-	+	-	-	+
694	Q15084	Protein disulfide-isomerase A6	HMW only	HMW only	+	+	+	-	-	-	-	+	+
695	P09936	Ubiquitin carboxyl-terminal hydrolase isozyme L1	HMW only	HMW only	+	+	+	+	-	-	-	-	+
696	P07333	Macrophage colony-stimulating factor 1 receptor	HMW only	HMW only	+	-	-	+	+	+	-	-	+
697	P05062	Fructose-bisphosphate aldolase B	HMW only	HMW only	+	-	-	+	+	+	-	+	+
698	Q8IXL6	Extracellular serine/threonine protein kinase FAM20C	HMW only	HMW only	+	-	-	+	-	+	-	-	+
699	P13667	Protein disulfide-isomerase A4	HMW only	HMW only	+	+	+	-	-	-	-	+	+
700	P26022	Pentraxin-related protein PTX3	HMW only	HMW only	+	-	-	+	+	+	-	+	+
701	Q16881	Thioredoxin reductase 1, cytoplasmic	HMW only	HMW only	+	+	+	+	-	-	-	-	+
702	P48668	Keratin, type II cytoskeletal 6C	HMW only	-	+	-	-	+	+	+	+	-	-
703	P15531	Nucleoside diphosphate kinase A	HMW only	HMW only	+	+	+	-	-	+	-	+	+
704	Q96SM3	Probable carboxypeptidase X1	HMW only	HMW only	+	-	-	+	-	+	-	+	+
705	Q14118	Dystroglycan	HMW only	HMW only	+	-	+	+	+	+	-	+	+
706	P30086	Phosphatidylethanolamine-binding protein 1	HMW only	HMW only	+	-	+	+	-	+	-	-	+
707	Q01105	Protein SET	HMW only	HMW only	+	+	+	-	-	-	-	+	+
708	Q86VB7	Scavenger receptor cysteine-rich type 1 protein M130	HMW only	HMW only	+	-	-	+	+	+	-	-	+
709	P12814	Alpha-actinin-1	HMW only	-	+	+	+	+	-	-	-	+	+
710	P07910	Heterogeneous nuclear ribonucleoproteins C1/C2	HMW only	HMW only	+	-	+	+	-	-	-	+	+
711	P05997	Collagen alpha-2(V) chain	HMW only	HMW only	+	-	-	+	-	+	-	+	+
712	P48637	Glutathione synthetase	HMW only	HMW only	+	+	+	-	+	+	-	-	+
713	P30043	Flavin reductase (NADPH)	HMW only	HMW only	+	-	+	-	-	-	+	-	+
714	Q01518	Adenylyl cyclase-associated protein 1	HMW only	HMW only	+	-	+	+	-	-	-	+	+
715	P67936	Tropomyosin alpha-4 chain	HMW only	HMW only	+	+	+	-	-	-	-	+	+
716	P16930	Fumarylacetoacetase	HMW only	HMW only	+	-	+	+	+	+	-	-	+
717	Q8N6C8	Leukocyte immunoglobulin-like receptor subfamily A member 3	HMW only	HMW only	+	-	-	+	-	-	-	-	+
718	P24821	Tenascin	HMW only	HMW only	+	-	+	+	-	+	-	+	+
719	Q9BTY2	Plasma alpha-L-fucosidase	HMW only	HMW only	+	-	+	+	-	+	-	+	+
720	P0DMV9	Heat shock 70 kDa protein 1B	HMW only	HMW only	-	-	+	-	-	-	-	+	+
721	Q99784	Noelin	HMW only	HMW only	+	-	-	+	+	+	-	-	+
722	P55285	Cadherin-6	HMW only	HMW only	+	-	-	+	+	+	-	-	+
723	O43505	Beta-1,4-glucuronyltransferase 1	HMW only	HMW only	+	-	-	+	-	+	-	-	+
724	P05455	Lupus La protein	HMW only	HMW only	-	-	+	-	-	-	-	+	+
725	Q92859	Neogenin	HMW only	HMW only	+	-	-	+	-	+	-	-	+
726	P13010	X-ray repair cross-complementing protein 5	HMW only	-	+	-	+	-	-	-	-	+	+
727	O00187	Mannan-binding lectin serine protease 2	HMW only	HMW only	+	-	-	+	+	+	-	+	+
728	Q01995	Transgelin	HMW only	HMW only	+	-	+	+	-	-	-	-	+
729	P40197	Platelet glycoprotein V	HMW only	-	+	-	-	+	-	-	-	-	+
730	P55287	Cadherin-11	HMW only	HMW only	+	-	+	-	-	+	-	-	+
731	P26572	Alpha-1,3-mannosyl-glycoprotein 2-beta-N-acetylglucosaminyltransferase	HMW only	HMW only	+	-	-	-	-	-	-	+	-
732	Q13867	Bleomycin hydrolase	HMW only	HMW only	+	+	+	-	-	+	-	-	+
733	P0DOY2	Immunoglobulin lambda constant 2	HMW only	-	-	-	+	+	+	+	+	-	+
734	Q8WZ75	Roundabout homolog 4	HMW only	HMW only	+	-	-	+	-	+	-	-	+
735	O00462	Beta-mannosidase	HMW only	-	+	-	-	-	-	-	-	+	+
736	O75326	Semaphorin-7A	HMW only	HMW only	+	-	+	+	-	+	-	-	+
737	P09238	Stromelysin-2	HMW only	HMW only	+	-	-	+	-	+	-	+	-
738	O75347	Tubulin-specific chaperone A	HMW only	HMW only	+	-	+	-	-	-	-	-	+
739	Q13219	Pappalysin-1	HMW only	HMW only	+	-	-	+	+	+	-	-	+
740	P12821	Angiotensin-converting enzyme	HMW only	HMW only	+	oocyte specific	-	-	+	+	-	-	+
741	P06748	Nucleophosmin	HMW only	HMW only	+	+	+	+	-	-	-	+	+
742	P35916	Vascular endothelial growth factor receptor 3	HMW only	HMW only	+	-	-	+	-	+	-	+	+
743	Q14240	Eukaryotic initiation factor 4A-II	HMW only	-	+	+	+	-	-	-	-	-	+
744	P13716	Delta-aminolevulinic acid dehydratase	HMW only	-	+	-	+	+	-	-	+	+	+
745	Q7Z7G0	Target of Nesh-SH3	HMW only	HMW only	+	-	-	+	+	+	-	-	+
746	Q16851	UTP--glucose-1-phosphate uridylyltransferase	HMW only	-	+	+	+	+	-	-	-	-	+
747	P22897	Macrophage mannose receptor 1	HMW only	-	+	-	-	+	-	+	-	-	+
748	P15121	Aldo-keto reductase family 1 member B1	HMW only	HMW only	+	+	+	+	-	-	-	-	+
749	Q9H4A9	Dipeptidase 2	HMW only	HMW only	+	-	-	+	-	+	-	-	+
750	Q13332	Receptor-type tyrosine-protein phosphatase S	HMW only	HMW only	+	-	-	+	-	+	-	-	+
751	P54727	UV excision repair protein RAD23 homolog B	HMW only	-	+	+	+	+	-	-	-	+	+
752	P06865	Beta-hexosaminidase subunit alpha	HMW only	-	+	-	+	-	-	-	-	+	+
753	Q86YZ3	Hornerin	HMW only	HMW only	+	oocyte specific	+	+	-	-	-	-	+
754	P25787	Proteasome subunit alpha type-2	HMW only	-	+	+	+	+	-	-	-	-	+
755	Q15181	Inorganic pyrophosphatase	HMW only	-	+	+	+	-	-	-	-	+	+
756	P30046	D-dopachrome decarboxylase	HMW only	HMW only	+	-	+	-	-	-	-	-	+
757	O43493	Trans-Golgi network integral membrane protein 2	HMW only	HMW only	+	-	+	+	-	-	-	-	+
758	Q15293	Reticulocalbin-1	HMW only	-	+	-	+	+	-	+	-	+	+
759	P15311	Ezrin	HMW only	+	+	+	+	+	+	-	-	+	+
760	Q08830	Fibrinogen-like protein 1	HMW only	HMW only	+	-	-	-	-	-	-	+	-
761	P80303	Nucleobindin-2	HMW only	HMW only	+	+	+	+	-	-	-	+	+
762	P31939	Bifunctional purine biosynthesis protein PURH	HMW only	-	+	+	+	-	-	-	-	+	+
763	P09382	Galectin-1	HMW only	HMW only	+	+	+	-	-	+	-	+	+
764	Q00839	Heterogeneous nuclear ribonucleoprotein U	HMW only	-	+	-	+	+	-	-	-	+	+
765	P30044	Peroxiredoxin-5, mitochondrial	HMW only	-	+	+	+	+	-	-	-	+	+
766	P49641	Alpha-mannosidase 2x	HMW only	HMW only	+	-	-	+	-	+	-	+	+
767	Q06481	Amyloid-like protein 2	HMW only	+	+	-	-	+	-	-	-	-	+
768	Q9Y5C1	Angiopoietin-related protein 3	HMW only	HMW only	+	-	-	+	-	+	-	+	+
769	P12956	X-ray repair cross-complementing protein 6	HMW only	HMW only	+	-	+	+	-	-	-	+	+
770	P20061	Transcobalamin-1	HMW only	HMW only	+	-	-	+	-	-	-	-	+
771	P00568	Adenylate kinase isoenzyme 1	HMW only	HMW only	+	-	+	-	-	-	-	-	+
772	O00339	Matrilin-2	HMW only	HMW only	+	-	-	+	-	+	-	+	+
773	P17813	Endoglin	HMW only	HMW only	+	-	-	+	-	+	-	-	+
774	P06753	Tropomyosin alpha-3 chain	HMW only	HMW only	+	+	+	-	-	-	-	+	+
775	Q9Y490	Talin-1	HMW only	-	+	-	+	+	+	-	-	+	+
776	Q06323	Proteasome activator complex subunit 1	HMW only	HMW only	+	-	+	+	-	-	-	-	+
777	O60462	Neuropilin-2	HMW only	-	+	-	-	-	-	+	-	+	+
778	P05109	Protein S100-A8	+	+	+	oocyte specific	+	-	+	+	+	+	+
779	Q9UKU6	Thyrotropin-releasing hormone-degrading ectoenzyme	HMW only	HMW only	+	-	-	-	-	+	-	-	+
780	P26639	Threonine--tRNA ligase, cytoplasmic	HMW only	HMW only	+	+	+	-	-	-	-	-	+
781	P37837	Transaldolase	HMW only	HMW only	+	+	+	-	-	+	-	+	+
782	Q8WWZ8	Oncoprotein-induced transcript 3 protein	HMW only	HMW only	+	-	-	+	-	+	-	+	+
783	Q9NPY3	Complement component C1q receptor	HMW only	HMW only	+	-	-	+	-	+	-	-	+
784	P14543	Nidogen-1	HMW only	HMW only	+	-	-	+	-	+	-	+	+
785	Q10471	Polypeptide N-acetylgalactosaminyltransferase 2	HMW only	HMW only	+	+	+	+	-	+	-	-	+
786	Q13421	Mesothelin	HMW only	HMW only	+	-	-	+	-	+	-	-	+
787	P02545	Prelamin-A/C	HMW only	HMW only	+	+	+	-	-	-	-	+	+
788	P63241	Eukaryotic translation initiation factor 5A-1	HMW only	HMW only	+	-	+	-	-	-	-	+	+
789	Q9NY97	N-acetyllactosaminide beta-1,3-N-acetylglucosaminyltransferase 2	HMW only	HMW only	+	+	-	+	-	+	-	-	+
790	Q9UL46	Proteasome activator complex subunit 2	HMW only	-	+	-	+	+	-	-	-	-	+
791	O60361	Putative nucleoside diphosphate kinase	HMW only	-	-	-	+	-	-	-	-	-	-
792	Q9H4G4	Golgi-associated plant pathogenesis-related protein 1	HMW only	-	+	-	+	+	+	+	-	-	+
793	P13797	Plastin-3	HMW only	HMW only	+	+	+	+	-	+	+	-	+
794	Q9NZ08	Endoplasmic reticulum aminopeptidase 1	HMW only	HMW only	+	-	+	+	-	+	-	-	+
795	P25774	Cathepsin S	HMW only	HMW only	+	-	+	+	-	+	-	-	+
796	Q9UBR2	Cathepsin Z	HMW only	HMW only	+	-	+	+	-	+	-	-	+
797	Q5D862	Filaggrin-2	HMW only	HMW only	+	oocyte specific	+	-	-	+	-	-	+
798	P61160	Actin-related protein 2	HMW only	-	+	+	+	-	-	-	-	-	+
799	P04066	Tissue alpha-L-fucosidase	HMW only	HMW only	+	+	+	+	-	+	-	+	+
800	Q99435	Protein kinase C-binding protein NELL2	HMW only	HMW only	+	-	-	+	+	+	-	+	+
801	Q96QK1	Vacuolar protein sorting-associated protein 35	HMW only	-	+	+	+	-	-	-	-	+	+
802	Q7KZF4	Staphylococcal nuclease domain-containing protein 1	HMW only	-	+	-	+	+	-	-	-	+	+
803	Q9NRN5	Olfactomedin-like protein 3	HMW only	-	+	-	-	+	-	+	-	+	+
804	Q7Z7M8	UDP-GlcNAc:betaGal beta-1,3-N-acetylglucosaminyltransferase 8	HMW only	-	-	-	-	+	-	-	-	-	+
805	P61088	Ubiquitin-conjugating enzyme E2 N	HMW only	-	+	+	+	-	-	-	-	-	+
806	Q9BWD1	Acetyl-CoA acetyltransferase, cytosolic	HMW only	-	+	+	+	+	-	-	-	-	+
807	P07686	Beta-hexosaminidase subunit beta	HMW only	HMW only	+	+	+	+	-	+	-	+	+
808	P09960	Leukotriene A-4 hydrolase	HMW only	-	+	+	+	+	-	+	-	-	+
809	P52907	F-actin-capping protein subunit alpha-1	HMW only	-	+	-	+	-	-	-	-	+	+
810	Q9BY67	Cell adhesion molecule 1	HMW only	HMW only	+	-	-	+	-	+	-	-	+
811	P00533	Epidermal growth factor receptor	HMW only	HMW only	+	-	+	+	-	+	-	-	+
812	Q9Y6Z7	Collectin-10	HMW only	HMW only	+	-	-	+	+	+	-	-	+
813	Q13231	Chitotriosidase-1	HMW only	-	+	-	-	-	-	-	-	-	+
814	P12110	Collagen alpha-2(VI) chain	HMW only	-	+	-	-	-	-	-	-	+	+
815	P09429	High mobility group protein B1	HMW only	HMW only	+	-	+	+	-	-	-	+	+
816	Q3SY84	Keratin, type II cytoskeletal 71	HMW only	-	+	-	+	-	-	-	-	-	-
817	Q07960	Rho GTPase-activating protein 1	HMW only	-	+	+	+	-	-	-	-	-	+
818	Q15393	Splicing factor 3B subunit 3	HMW only	-	+	-	+	-	-	-	-	-	+
819	P11362	Fibroblast growth factor receptor 1	HMW only	HMW only	+	-	-	+	-	+	-	-	+
820	O14773	Tripeptidyl-peptidase 1	HMW only	-	+	-	+	+	-	+	-	+	+
821	P14550	Aldo-keto reductase family 1 member A1	HMW only	HMW only	+	+	+	+	-	-	-	-	+
822	Q8IUL8	Cartilage intermediate layer protein 2	HMW only	HMW only	-	-	-	-	-	+	-	-	+
823	Q8WUM4	Programmed cell death 6-interacting protein	HMW only	-	+	+	+	-	-	-	-	-	+
824	Q99941	Cyclic AMP-dependent transcription factor ATF-6 beta	HMW only	-	+	-	-	+	-	+	-	-	+
825	P80723	Brain acid soluble protein 1	HMW only	HMW only	+	+	+	+	-	-	-	-	+
826	O15335	Chondroadherin	HMW only	-	+	-	-	+	+	+	-	+	+
827	P16152	Carbonyl reductase [NADPH] 1	HMW only	HMW only	+	-	+	+	-	-	-	+	+
828	Q13449	Limbic system-associated membrane protein	HMW only	HMW only	+	-	-	+	-	-	-	-	+
829	P48163	NADP-dependent malic enzyme	HMW only	-	+	-	+	-	-	-	-	-	+
830	P40926	Malate dehydrogenase, mitochondrial	HMW only	HMW only	+	+	+	+	-	-	-	-	+
831	P62249	40S ribosomal protein S16	HMW only	HMW only	+	+	+	-	-	-	-	+	+
832	P42785	Lysosomal Pro-X carboxypeptidase	HMW only	HMW only	+	-	+	+	-	+	-	+	+
833	P60900	Proteasome subunit alpha type-6	HMW only	-	+	-	+	-	-	-	-	+	+
834	O75368	SH3 domain-binding glutamic acid-rich-like protein	HMW only	HMW only	+	-	+	-	-	-	-	-	+
835	P62942	Peptidyl-prolyl cis-trans isomerase FKBP1A	HMW only	HMW only	+	-	+	+	-	-	-	-	+
836	Q99538	Legumain	HMW only	-	+	-	+	-	-	-	-	-	-
837	Q8TBY8	Polyamine-modulated factor 1-binding protein 1	HMW only	-	+	-	-	-	-	-	-	-	-
838	P78324	Tyrosine-protein phosphatase non-receptor type substrate 1	HMW only	-	+	-	-	-	-	-	-	-	+
839	P31323	cAMP-dependent protein kinase type II-beta regulatory subunit	HMW only	-	-	-	+	-	-	-	-	+	+
840	Q9NTU7	Cerebellin-4	HMW only	-	+	-	-	-	-	-	-	-	+
841	P55786	Puromycin-sensitive aminopeptidase	HMW only	HMW only	+	+	+	-	-	-	-	-	+
842	P12645	Bone morphogenetic protein 3	HMW only	HMW only	+	-	+	-	-	-	-	+	+
843	P54578	Ubiquitin carboxyl-terminal hydrolase 14	HMW only	-	+	+	+	+	-	-	-	-	+
844	Q13508	Ecto-ADP-ribosyltransferase 3	HMW only	-	+	-	-	-	-	+	-	-	+
845	Q04760	Lactoylglutathione lyase	HMW only	-	+	+	+	+	-	-	-	-	+
846	Q13185	Chromobox protein homolog 3	HMW only	-	+	-	+	-	-	-	-	+	+
847	P55103	Inhibin beta C chain	HMW only	HMW only	+	-	-	+	-	+	-	+	+
848	P08833	Insulin-like growth factor-binding protein 1	HMW only	HMW only	+	oocyte specific	-	+	+	+	+	+	+
849	Q9BRA2	Thioredoxin domain-containing protein 17	HMW only	HMW only	+	+	+	+	-	-	-	-	+
850	O14818	Proteasome subunit alpha type-7	HMW only	HMW only	+	+	+	-	-	-	-	+	+
851	P07711	Cathepsin L1	HMW only	HMW only	+	-	+	-	+	+	-	+	+
852	P08779	Keratin, type I cytoskeletal 16	HMW only	HMW only	+	-	+	+	-	+	+	-	+
853	Q00688	Peptidyl-prolyl cis-trans isomerase FKBP3	HMW only	-	+	+	+	-	-	-	-	-	+
854	P21333	Filamin-A	HMW only	HMW only	+	+	+	+	-	-	-	+	+
855	P62987	Ubiquitin-60S ribosomal protein L40	HMW only	HMW only	-	-	+	-	-	+	-	-	+
856	O75356	Ectonucleoside triphosphate diphosphohydrolase 5	HMW only	-	+	-	-	-	-	+	-	+	+
857	P63244	Receptor of activated protein C kinase 1	HMW only	-	+	-	+	-	-	-	-	+	+
858	P63208	S-phase kinase-associated protein 1	HMW only	-	+	-	+	-	-	-	-	+	+
859	O75223	Gamma-glutamylcyclotransferase	HMW only	HMW only	+	+	+	-	-	+	-	-	+
860	Q7Z3Y8	Keratin, type I cytoskeletal 27	HMW only	-	+	-	-	-	-	-	-	-	-
861	Q8NCC3	Group XV phospholipase A2	HMW only	-	+	-	+	-	-	-	-	-	+
862	P20908	Collagen alpha-1(V) chain	HMW only	HMW only	+	-	-	+	+	+	-	+	+
863	Q15819	Ubiquitin-conjugating enzyme E2 variant 2	HMW only	-	+	-	+	-	-	-	-	-	-
864	P52272	Heterogeneous nuclear ribonucleoprotein M	HMW only	-	+	-	+	-	-	-	-	+	+
865	P53004	Biliverdin reductase A	HMW only	-	+	-	+	+	-	-	-	-	+
866	P23396	40S ribosomal protein S3	HMW only	HMW only	+	+	+	-	-	-	-	+	+
867	Q9P1U1	Actin-related protein 3B	HMW only	-	-	-	-	+	-	-	-	-	-
868	Q99650	Oncostatin-M-specific receptor subunit beta	HMW only	-	+	-	-	-	-	-	-	-	+
869	Q07955	Serine/arginine-rich splicing factor 1	HMW only	HMW only	+	-	+	-	-	-	-	+	+
870	O60243	Heparan-sulfate 6-O-sulfotransferase 1	HMW only	HMW only	-	-	-	-	-	+	-	+	+
871	Q15262	Receptor-type tyrosine-protein phosphatase kappa	HMW only	HMW only	+	-	-	+	-	+	-	-	+
872	P27816	Microtubule-associated protein 4	HMW only	-	+	-	+	+	-	-	-	+	+
873	Q13243	Serine/arginine-rich splicing factor 5	HMW only	-	+	-	+	-	-	-	-	-	-
874	P10586	Receptor-type tyrosine-protein phosphatase F	HMW only	HMW only	+	-	-	-	-	+	-	-	+
875	Q02487	Desmocollin-2	HMW only	HMW only	+	-	+	+	-	+	-	-	+
876	Q12906	Interleukin enhancer-binding factor 3	HMW only	-	+	-	+	-	-	-	-	+	+
877	P16403	Histone H1.2	HMW only	LMW only	+	-	+	-	-	-	-	+	+
878	Q9BWS9	Chitinase domain-containing protein 1	HMW only	-	-	-	+	-	-	-	-	-	+
879	Q16222	UDP-N-acetylhexosamine pyrophosphorylase	HMW only	-	+	-	+	-	-	-	-	-	-
880	P06576	ATP synthase subunit beta, mitochondrial	HMW only	-	+	+	+	-	-	-	-	+	+
881	P27635	60S ribosomal protein L10	HMW only	HMW only	+	-	+	-	-	-	-	+	+
882	P35442	Thrombospondin-2	HMW only	-	+	-	-	-	-	-	-	+	+
883	Q07075	Glutamyl aminopeptidase	HMW only	HMW only	+	-	-	+	-	+	-	-	+
884	P27348	14-3-3 protein theta	HMW only	HMW only	+	+	+	+	+	-	-	+	+
885	Q01130	Serine/arginine-rich splicing factor 2	HMW only	-	+	-	+	-	-	-	-	+	+
886	Q14112	Nidogen-2	HMW only	HMW only	+	-	-	+	+	+	-	+	+
887	P80188	Neutrophil gelatinase-associated lipocalin	HMW only	HMW only	+	-	-	+	-	+	-	-	+
888	O94760	N(G),N(G)-dimethylarginine dimethylaminohydrolase 1	HMW only	-	+	-	+	-	-	-	-	-	+
889	P20933	N(4)-(beta-N-acetylglucosaminyl)-L-asparaginase	HMW only	-	+	-	+	-	-	-	-	-	-
890	Q71DI3	Histone H3.2	HMW only	+	-	-	+	+	-	-	-	+	-
891	Q9NPR2	Semaphorin-4B	HMW only	HMW only	+	-	-	-	-	-	-	+	+
892	P31944	Caspase-14	HMW only	HMW only	+	-	+	-	-	+	-	+	+
893	Q9H299	SH3 domain-binding glutamic acid-rich-like protein 3	HMW only	HMW only	+	-	+	-	-	-	-	-	+
894	P00505	Aspartate aminotransferase, mitochondrial	HMW only	-	+	+	+	-	-	-	-	-	+
895	Q96CN7	Isochorismatase domain-containing protein 1	HMW only	-	-	+	+	-	-	-	-	-	+
896	Q8NC51	Plasminogen activator inhibitor 1 RNA-binding protein	HMW only	HMW only	+	-	+	-	-	-	-	+	+
897	P55209	Nucleosome assembly protein 1-like 1	HMW only	-	+	+	+	-	-	-	-	+	+
898	P62269	40S ribosomal protein S18	HMW only	HMW only	+	+	+	-	-	-	-	+	+
899	P39687	Acidic leucine-rich nuclear phosphoprotein 32 family member A	HMW only	HMW only	+	-	+	-	-	-	-	-	+
900	Q8WZA1	Protein O-linked-mannose beta-1,2-N-acetylglucosaminyltransferase 1	HMW only	-	-	+	-	-	-	-	-	-	-
901	P16949	Stathmin	HMW only	-	+	-	+	-	-	-	-	-	+
902	P11717	Cation-independent mannose-6-phosphate receptor	HMW only	HMW only	+	-	+	+	-	+	-	-	+
903	Q9UBX1	Cathepsin F	HMW only	HMW only	+	-	-	+	-	+	-	+	+
904	P26599	Polypyrimidine tract-binding protein 1	HMW only	-	+	-	+	-	-	-	-	+	+
905	P05388	60S acidic ribosomal protein P0	HMW only	-	+	-	+	-	-	-	-	+	+
906	P30530	Tyrosine-protein kinase receptor UFO	HMW only	HMW only	+	+	-	+	-	+	-	+	+
907	O15394	Neural cell adhesion molecule 2	HMW only	HMW only	+	-	-	-	-	+	-	-	+
908	P09603	Macrophage colony-stimulating factor 1	HMW only	LMW only	+	-	-	+	+	+	-	-	+
909	P48723	Heat shock 70 kDa protein 13	HMW only	-	+	-	+	+	-	-	-	-	-
910	Q16543	Hsp90 co-chaperone Cdc37	HMW only	-	+	+	+	+	-	-	-	+	+
911	P54577	Tyrosine--tRNA ligase, cytoplasmic	HMW only	-	+	-	+	-	-	-	-	-	+
912	P19961	Alpha-amylase 2B	HMW only	HMW only	+	-	-	-	-	-	-	+	-
913	Q9Y625	Glypican-6	HMW only	-	+	-	+	+	-	-	-	+	+
914	P19256	Lymphocyte function-associated antigen 3	HMW only	HMW only	-	-	+	-	-	-	-	-	+
915	P52823	Stanniocalcin-1	HMW only	HMW only	+	-	-	+	+	+	+	+	+
916	P10109	Adrenodoxin, mitochondrial	HMW only	-	+	-	+	-	-	-	-	+	+
917	Q8IWU5	Extracellular sulfatase Sulf-2	HMW only	HMW only	+	-	-	+	+	+	-	+	+
918	P13489	Ribonuclease inhibitor	HMW only	HMW only	+	+	+	+	-	-	-	+	+
919	Q13620	Cullin-4B	HMW only	-	+	+	+	-	-	-	-	-	-
920	P13693	Translationally-controlled tumor protein	HMW only	HMW only	+	-	+	-	-	-	-	-	+
921	P35237	Serpin B6	HMW only	-	+	-	+	+	-	-	-	-	+
922	P05556	Integrin beta-1	HMW only	-	+	+	+	+	-	+	-	-	+
923	P14314	Glucosidase 2 subunit beta	HMW only	HMW only	+	-	+	+	-	+	-	+	+
924	Q7LGC8	Carbohydrate sulfotransferase 3	HMW only	HMW only	-	-	+	+	-	+	-	-	+
925	P15085	Carboxypeptidase A1	HMW only	-	+	-	-	-	-	-	-	-	+
926	Q96NZ9	Proline-rich acidic protein 1	HMW only	HMW only	-	-	-	-	-	-	-	+	+
927	Q86TI0	TBC1 domain family member 1	HMW only	-	+	-	-	-	-	-	-	-	-
928	Q92823	Neuronal cell adhesion molecule	HMW only	HMW only	+	-	-	-	-	-	-	-	+
929	Q16629	Serine/arginine-rich splicing factor 7	HMW only	-	+	-	+	-	-	-	-	-	+
930	P16989	Y-box-binding protein 3	HMW only	-	+	+	+	-	-	-	-	+	-
931	Q9BQ16	Testican-3	HMW only	-	+	-	-	-	+	+	-	-	+
932	Q15056	Eukaryotic translation initiation factor 4H	HMW only	-	+	+	+	+	-	-	-	-	+
933	P50502	Hsc70-interacting protein	HMW only	-	+	+	+	-	-	-	-	-	+
934	P07738	Bisphosphoglycerate mutase	HMW only	-	+	+	-	-	-	-	+	-	+
935	Q99983	Osteomodulin	HMW only	-	+	-	-	+	-	+	-	+	+
936	Q9H0U4	Ras-related protein Rab-1B	HMW only	HMW only	+	+	+	-	-	-	-	+	+
937	P07307	Asialoglycoprotein receptor 2	HMW only	HMW only	+	-	-	+	-	+	-	+	+
938	P22234	Multifunctional protein ADE2	HMW only	-	+	+	+	-	-	-	-	-	+
939	Q99584	Protein S100-A13	HMW only	HMW only	+	-	+	-	-	+	-	+	+
940	Q15166	Serum paraoxonase/lactonase 3	HMW only	HMW only	+	-	-	-	+	+	+	+	+
941	O00241	Signal-regulatory protein beta-1	HMW only	-	-	-	-	-	-	-	-	-	+
942	P84243	Histone H3.3	HMW only	-	-	-	+	-	-	-	-	-	+
943	P68431	Histone H3.1	HMW only	-	-	-	+	-	-	-	-	-	+
944	P26583	High mobility group protein B2	HMW only	-	+	-	+	-	-	-	-	+	+
945	O43776	Asparagine--tRNA ligase, cytoplasmic	HMW only	-	+	+	+	-	-	-	-	+	+
946	P29508	Serpin B3	HMW only	HMW only	+	oocyte specific	-	-	-	+	+	-	+
947	Q14152	Eukaryotic translation initiation factor 3 subunit A	HMW only	-	+	-	+	+	-	-	-	+	+
948	Q9Y5B9	FACT complex subunit SPT16	HMW only	-	+	-	+	-	-	-	-	-	+
949	P09874	Poly [ADP-ribose] polymerase 1	HMW only	-	+	-	+	-	-	-	-	-	+
950	P34932	Heat shock 70 kDa protein 4	HMW only	HMW only	+	+	+	-	-	-	-	+	+
951	P05060	Secretogranin-1	HMW only	HMW only	+	-	-	+	-	+	-	+	+
952	Q16363	Laminin subunit alpha-4	HMW only	-	+	-	-	-	-	-	-	-	+
953	P31948	Stress-induced-phosphoprotein 1	HMW only	-	+	+	+	-	-	-	-	+	+
954	P53621	Coatomer subunit alpha	HMW only	-	+	+	+	-	-	-	-	+	+
955	P82970	High mobility group nucleosome-binding domain-containing protein 5	HMW only	-	+	-	+	+	-	-	-	-	+
956	P13497	Bone morphogenetic protein 1	HMW only	-	+	-	-	-	-	-	-	+	+
957	Q9NS84	Carbohydrate sulfotransferase 7	HMW only	-	+	-	+	+	-	-	-	+	-
958	P07384	Calpain-1 catalytic subunit	HMW only	-	+	-	+	-	-	+	-	-	+
959	Q8IZF2	Adhesion G protein-coupled receptor F5	HMW only	HMW only	+	-	-	-	-	+	-	-	+
960	O00410	Importin-5	HMW only	-	+	+	+	-	-	-	-	+	+
961	Q9UNZ2	NSFL1 cofactor p47	HMW only	HMW only	+	+	+	-	-	-	-	+	+
962	Q96G03	Phosphoglucomutase-2	HMW only	HMW only	+	+	+	-	-	-	-	-	+
963	P22079	Lactoperoxidase	HMW only	-	+	-	-	-	-	-	-	-	-
964	Q13451	Peptidyl-prolyl cis-trans isomerase FKBP5	HMW only	HMW only	+	-	+	-	-	-	-	-	+
965	P40763	Signal transducer and activator of transcription 3	HMW only	-	+	-	+	-	-	-	-	-	-
966	Q09328	Alpha-1,6-mannosylglycoprotein 6-beta-N-acetylglucosaminyltransferase A	HMW only	-	+	-	+	-	-	+	-	+	-
967	Q9H173	Nucleotide exchange factor SIL1	HMW only	-	+	-	+	+	-	-	-	+	-
968	O95897	Noelin-2	HMW only	-	+	-	-	-	-	-	-	-	+
969	Q86UX7	Fermitin family homolog 3	HMW only	-	+	-	-	+	-	-	-	-	-
970	Q96C19	EF-hand domain-containing protein D2	HMW only	-	+	-	+	-	-	-	-	-	+
971	Q13617	Cullin-2	HMW only	-	+	-	+	-	-	-	-	-	-
972	P10155	60 kDa SS-A/Ro ribonucleoprotein	HMW only	-	+	-	+	-	-	-	-	-	+
973	Q9BQT9	Calsyntenin-3	HMW only	-	+	-	-	-	-	+	-	+	+
974	Q96QP1	Alpha-protein kinase 1	HMW only	-	-	-	-	-	-	-	-	-	-
975	P10645	Chromogranin-A	HMW only	HMW only	+	oocyte specific	-	+	-	-	-	+	+
976	Q8TDX6	Chondroitin sulfate N-acetylgalactosaminyltransferase 1	HMW only	-	+	-	+	+	-	-	-	-	-
977	P23526	Adenosylhomocysteinase	HMW only	-	+	+	+	-	-	-	-	+	+
978	P08311	Cathepsin G	HMW only	-	+	-	-	-	-	-	-	-	-
979	Q9BY76	Angiopoietin-related protein 4	HMW only	-	+	-	-	+	-	-	-	+	+
980	Q9NZL9	Methionine adenosyltransferase 2 subunit beta	HMW only	-	-	-	+	-	-	-	-	-	+
981	P62495	Eukaryotic peptide chain release factor subunit 1	HMW only	-	+	+	+	+	-	-	-	+	+
982	P49354	Protein farnesyltransferase/geranylgeranyltransferase type-1 subunit alpha	HMW only	-	+	-	+	-	-	-	-	-	+
983	P15586	N-acetylglucosamine-6-sulfatase	HMW only	-	-	-	+	-	-	-	-	-	+
984	Q9BS26	Endoplasmic reticulum resident protein 44	HMW only	-	+	+	+	-	-	+	-	+	+
985	P60891	Ribose-phosphate pyrophosphokinase 1	HMW only	-	+	+	+	-	-	-	-	-	-
986	O00592	Podocalyxin	HMW only	+	+	-	-	+	-	-	-	-	+
987	Q92563	Testican-2	HMW only	HMW only	+	-	-	+	-	+	-	+	-
988	Q15417	Calponin-3	HMW only	-	+	+	+	-	-	-	-	+	+
989	P20290	Transcription factor BTF3	HMW only	-	+	-	+	-	-	-	-	-	-
990	O15143	Actin-related protein 2/3 complex subunit 1B	HMW only	-	+	-	+	-	-	-	-	-	+
991	Q99436	Proteasome subunit beta type-7	HMW only	-	+	-	+	-	-	-	-	+	+
992	Q96HR9	Receptor expression-enhancing protein 6	HMW only	-	-	-	+	-	-	-	-	+	+
993	P62314	Small nuclear ribonucleoprotein Sm D1	HMW only	-	+	+	+	-	-	-	-	-	-
994	P61604	10 kDa heat shock protein, mitochondrial	HMW only	-	+	+	+	+	-	-	-	-	+
995	P61086	Ubiquitin-conjugating enzyme E2 K	HMW only	-	+	+	+	-	-	-	-	-	+
996	P30085	UMP-CMP kinase	HMW only	-	+	+	+	+	-	-	-	-	+
997	Q8N126	Cell adhesion molecule 3	HMW only	-	+	-	-	-	-	-	-	-	-
998	Q5T9C2	Protein FAM102A	HMW only	-	+	-	-	-	-	-	-	-	-
999	Q16775	Hydroxyacylglutathione hydrolase, mitochondrial	HMW only	-	+	-	+	-	-	-	-	-	+
1000	P31151	Protein S100-A7	HMW only	HMW only	+	oocyte specific	-	+	-	+	+	+	+
1001	P23435	Cerebellin-1	HMW only	-	+	-	-	-	-	-	-	-	+
1002	O15511	Actin-related protein 2/3 complex subunit 5	HMW only	-	+	+	+	-	-	-	-	-	+
1003	Q9Y547	Intraflagellar transport protein 25 homolog	HMW only	-	-	-	+	-	-	-	-	-	+
1004	Q13630	GDP-L-fucose synthase	HMW only	-	+	+	+	-	-	-	-	-	+
1005	P62266	40S ribosomal protein S23	HMW only	-	+	-	+	-	-	-	-	+	+
1006	P02792	Ferritin light chain	HMW only	-	+	+	+	+	+	+	-	+	+
1007	Q9Y2V2	Calcium-regulated heat-stable protein 1	HMW only	-	+	+	+	-	-	-	-	-	+
1008	Q9ULZ3	Apoptosis-associated speck-like protein containing a CARD	HMW only	-	-	-	-	-	-	-	-	-	+
1009	Q6EEV6	Small ubiquitin-related modifier 4	HMW only	-	-	-	+	-	-	-	-	-	-
1010	O60888	Protein CutA	HMW only	-	+	+	+	+	-	-	-	+	+
1011	Q9UMX5	Neudesin	HMW only	-	+	+	+	-	-	-	-	-	-
1012	Q96C90	Protein phosphatase 1 regulatory subunit 14B	HMW only	-	+	-	+	-	-	-	-	-	+
1013	Q8NBF2	NHL repeat-containing protein 2	HMW only	-	-	-	+	-	-	-	-	-	-
1014	P62888	60S ribosomal protein L30	HMW only	-	+	+	+	+	-	-	-	+	+
1015	P61916	NPC intracellular cholesterol transporter 2	HMW only	HMW only	+	-	+	-	-	-	-	-	+
1016	P55056	Apolipoprotein C-IV	HMW only	HMW only	+	-	-	-	+	+	+	+	+
1017	P13987	CD59 glycoprotein	HMW only	-	+	+	+	-	-	+	-	-	+
1018	Q9H2L4	Transmembrane protein 60	HMW only	-	-	-	-	-	-	-	-	-	-
1019	P62304	Small nuclear ribonucleoprotein E	HMW only	-	+	-	+	+	-	-	-	+	+
1020	P04080	Cystatin-B	HMW only	-	+	+	+	-	-	-	+	-	+
1021	Q99426	Tubulin-folding cofactor B	HMW only	-	+	+	+	-	-	-	-	-	+
1022	Q06828	Fibromodulin	HMW only	HMW only	+	-	-	-	-	-	-	-	+
1023	P18827	Syndecan-1	HMW only	HMW only	+	-	-	+	-	-	-	-	+
1024	P58546	Myotrophin	HMW only	-	+	+	+	-	-	-	-	-	+
1025	Q86SQ4	Adhesion G-protein coupled receptor G6	HMW only	HMW only	+	-	-	-	-	+	-	-	+
1026	Q9NPG4	Protocadherin-12	HMW only	-	+	-	-	-	-	+	-	+	+
1027	O14960	Leukocyte cell-derived chemotaxin-2	HMW only	HMW only	+	-	-	+	-	-	-	-	+
1028	Q12866	Tyrosine-protein kinase Mer	HMW only	HMW only	+	-	-	-	-	-	-	-	+
1029	P62913	60S ribosomal protein L11	HMW only	-	+	+	+	-	-	-	-	+	+
1030	Q8IUX7	Adipocyte enhancer-binding protein 1	HMW only	HMW only	+	-	-	-	-	+	-	+	+
1031	Q96GX9	Methylthioribulose-1-phosphate dehydratase	HMW only	-	-	-	-	-	-	-	-	-	-
1032	P51991	Heterogeneous nuclear ribonucleoprotein A3	HMW only	HMW only	+	+	+	-	-	-	-	+	+
1033	O15217	Glutathione S-transferase A4	HMW only	HMW only	-	-	+	-	-	-	-	-	+
1034	Q15185	Prostaglandin E synthase 3	HMW only	HMW only	+	-	+	-	-	-	-	+	+
1035	P52597	Heterogeneous nuclear ribonucleoprotein F	HMW only	-	+	+	+	-	-	-	-	+	+
1036	Q6FHJ7	Secreted frizzled-related protein 4	HMW only	-	-	-	+	-	-	-	-	+	+
1037	P56537	Eukaryotic translation initiation factor 6	HMW only	-	+	-	+	-	-	-	-	-	+
1038	Q99733	Nucleosome assembly protein 1-like 4	HMW only	-	+	-	+	+	-	-	-	+	+
1039	P20962	Parathymosin	HMW only	-	-	-	+	-	-	-	-	-	+
1040	P25786	Proteasome subunit alpha type-1	HMW only	HMW only	+	+	+	-	-	-	-	+	+
1041	Q86X29	Lipolysis-stimulated lipoprotein receptor	HMW only	-	-	+	+	-	-	-	-	+	+
1042	O95672	Endothelin-converting enzyme-like 1	HMW only	-	+	-	-	-	-	-	-	-	-
1043	Q08345	Epithelial discoidin domain-containing receptor 1	HMW only	-	+	-	-	+	-	-	-	-	-
1044	O00584	Ribonuclease T2	HMW only	-	+	-	+	+	-	-	-	-	+
1045	P11684	Uteroglobin	HMW only	-	+	-	-	+	-	-	-	-	+
1046	Q15691	Microtubule-associated protein RP/EB family member 1	HMW only	-	+	+	+	-	-	-	-	+	+
1047	Q8NI22	Multiple coagulation factor deficiency protein 2	HMW only	-	+	-	+	-	-	-	-	-	-
1048	Q9UHX1	Poly(U)-binding-splicing factor PUF60	HMW only	-	+	-	+	-	-	-	-	-	-
1049	Q6UX72	UDP-GlcNAc:betaGal beta-1,3-N-acetylglucosaminyltransferase 9	HMW only	-	-	-	-	-	-	-	-	-	-
1050	P24534	Elongation factor 1-beta	HMW only	HMW only	+	+	+	-	-	-	-	+	+
1051	Q8IWV2	Contactin-4	HMW only	HMW only	+	-	-	+	-	-	-	-	+
1052	P41250	Glycine--tRNA ligase	HMW only	-	+	+	+	+	-	-	-	-	+
1053	P28066	Proteasome subunit alpha type-5	HMW only	HMW only	+	+	+	-	+	-	-	+	+
1054	P49721	Proteasome subunit beta type-2	HMW only	-	+	+	+	+	+	-	-	-	+
1055	P30048	Thioredoxin-dependent peroxide reductase, mitochondrial	HMW only	-	+	+	+	-	-	-	-	-	+
1056	Q92995	Ubiquitin carboxyl-terminal hydrolase 13	HMW only	-	+	-	+	-	-	-	-	-	-
1057	P53999	Activated RNA polymerase II transcriptional coactivator p15	HMW only	-	+	-	+	-	-	-	-	+	+
1058	Q86UP2	Kinectin	HMW only	-	+	+	+	-	-	-	-	+	+
1059	Q9ULI3	Protein HEG homolog 1	HMW only	HMW only	+	-	-	-	-	-	-	-	+
1060	P51858	Hepatoma-derived growth factor	HMW only	HMW only	+	-	+	-	-	-	-	-	+
1061	P28838	Cytosol aminopeptidase	HMW only	-	+	+	+	-	-	-	-	-	+
1062	Q68BL8	Olfactomedin-like protein 2B	HMW only	HMW only	-	-	-	+	-	+	-	+	+
1063	Q86SE5	RNA-binding Raly-like protein	HMW only	-	+	-	-	-	-	-	-	-	-
1064	Q9H115	Beta-soluble NSF attachment protein	HMW only	-	+	-	-	-	-	-	-	-	-
1065	P19105	Myosin regulatory light chain 12A	HMW only	-	+	-	+	-	-	-	-	+	-
1066	O95185	Netrin receptor UNC5C	HMW only	-	+	-	-	-	-	-	-	-	+
1067	P08581	Hepatocyte growth factor receptor	HMW only	HMW only	+	-	-	+	-	+	-	-	+
1068	P61163	Alpha-centractin	HMW only	-	+	+	+	+	-	-	-	-	+
1069	Q8N118	Cytochrome P450 4X1	HMW only	-	-	-	-	-	-	-	-	-	-
1070	Q9Y644	Beta-1,3-N-acetylglucosaminyltransferase radical fringe	HMW only	-	+	-	-	-	-	-	-	+	-
1071	P41271	Neuroblastoma suppressor of tumorigenicity 1	HMW only	-	+	-	-	-	-	-	-	-	+
1072	Q15257	Serine/threonine-protein phosphatase 2A activator	HMW only	-	+	+	+	-	-	-	-	-	+
1073	P25789	Proteasome subunit alpha type-4	HMW only	-	+	+	+	-	-	-	-	+	+
1074	P68036	Ubiquitin-conjugating enzyme E2 L3	HMW only	HMW only	+	+	+	+	-	-	-	-	+
1075	Q11206	CMP-N-acetylneuraminate-beta-galactosamide-alpha-2,3-sialyltransferase 4	HMW only	-	+	-	+	-	-	-	-	+	+
1076	P47897	Glutamine--tRNA ligase	HMW only	-	+	-	+	-	-	-	-	-	+
1077	Q09028	Histone-binding protein RBBP4	HMW only	-	+	+	+	-	-	-	-	-	+
1078	P51688	N-sulphoglucosamine sulphohydrolase	HMW only	-	-	-	+	-	-	-	-	-	-
1079	O43396	Thioredoxin-like protein 1	HMW only	HMW only	+	-	+	+	-	-	-	+	+
1080	P21810	Biglycan	HMW only	HMW only	+	-	-	-	-	-	-	+	+
1081	Q92598	Heat shock protein 105 kDa	HMW only	-	+	+	+	-	-	-	-	-	+
1082	O14498	Immunoglobulin superfamily containing leucine-rich repeat protein	HMW only	HMW only	+	-	-	+	-	-	-	+	+
1083	O15144	Actin-related protein 2/3 complex subunit 2	HMW only	-	+	+	+	-	-	-	-	-	+
1084	Q15435	Protein phosphatase 1 regulatory subunit 7	HMW only	-	+	+	+	-	-	-	-	-	+
1085	Q96J42	Thioredoxin domain-containing protein 15	HMW only	-	+	-	-	-	-	-	-	-	+
1086	P14780	Matrix metalloproteinase-9	HMW only	-	+	-	-	+	+	-	-	-	-
1087	P34059	N-acetylgalactosamine-6-sulfatase	HMW only	-	+	-	+	-	-	-	-	-	-
1088	Q9P232	Contactin-3	HMW only	HMW only	+	-	-	-	-	-	-	-	+
1089	P12318	Low affinity immunoglobulin gamma Fc region receptor II-a	HMW only	-	+	-	-	-	-	-	-	-	+
1090	P08887	Interleukin-6 receptor subunit alpha	HMW only	-	+	-	-	-	-	-	-	-	+
1091	O75487	Glypican-4	HMW only	-	+	-	+	-	-	-	-	-	+
1092	Q9HC35	Echinoderm microtubule-associated protein-like 4	HMW only	-	+	-	+	+	-	-	-	+	+
1093	Q9Y295	Developmentally-regulated GTP-binding protein 1	HMW only	-	+	-	+	-	-	-	-	-	-
1094	O15072	A disintegrin and metalloproteinase with thrombospondin motifs 3	HMW only	-	+	-	-	-	-	-	-	+	-
1095	Q15382	GTP-binding protein Rheb	HMW only	-	+	-	+	-	-	-	-	-	-
1096	Q9BUD6	Spondin-2	HMW only	-	+	-	-	+	-	-	-	+	+
1097	O94769	Extracellular matrix protein 2	HMW only	HMW only	+	-	-	-	-	-	-	+	+
1098	Q9GZP0	Platelet-derived growth factor D	HMW only	-	-	-	-	-	-	-	-	+	-
1099	P11387	DNA topoisomerase 1	HMW only	-	+	-	+	-	-	-	-	-	+
1100	P38159	RNA-binding motif protein, X chromosome	HMW only	-	+	-	+	-	-	-	-	+	+
1101	P55010	Eukaryotic translation initiation factor 5	HMW only	-	+	+	+	-	-	-	-	+	-
1102	P20827	Ephrin-A1	HMW only	-	+	-	-	-	-	-	-	-	-
1103	P35754	Glutaredoxin-1	HMW only	-	+	+	+	-	-	-	-	+	+
1104	P28827	Receptor-type tyrosine-protein phosphatase mu	HMW only	HMW only	+	-	-	-	-	-	-	-	+
1105	Q6UWB4	Serine protease 55	HMW only	-	+	-	-	-	-	-	-	-	-
1106	P42224	Signal transducer and activator of transcription 1-alpha/beta	HMW only	-	+	-	+	-	-	-	-	+	-
1107	P60842	Eukaryotic initiation factor 4A-I	HMW only	HMW only	+	-	+	+	-	-	-	+	+
1108	Q08554	Desmocollin-1	HMW only	HMW only	+	+	-	-	-	+	-	-	+
1109	Q00796	Sorbitol dehydrogenase	HMW only	-	+	-	+	+	-	-	-	+	+
1110	Q9Y287	Integral membrane protein 2B	HMW only	-	+	-	-	-	-	-	-	+	+
1111	P20810	Calpastatin	HMW only	-	+	+	+	-	-	-	-	-	+
1112	Q15828	Cystatin-M	HMW only	-	+	-	-	-	-	-	-	-	+
1113	Q9BYT8	Neurolysin, mitochondrial	HMW only	-	+	-	+	-	-	-	-	-	-
1114	P16401	Histone H1.5	HMW only	LMW only	+	-	+	-	-	-	-	+	+
1115	O95747	Serine/threonine-protein kinase OSR1	HMW only	-	-	+	+	-	-	-	-	-	-
1116	Q9NQ38	Serine protease inhibitor Kazal-type 5	HMW only	-	+	-	-	-	-	-	-	-	+
1117	Q14696	LRP chaperone MESD	HMW only	-	+	+	+	-	-	-	-	-	-
1118	P62191	26S proteasome regulatory subunit 4	HMW only	-	+	+	+	-	-	-	-	+	+
1119	P05164	Myeloperoxidase	HMW only	HMW only	+	-	-	+	-	+	-	+	+
1120	Q86X52	Chondroitin sulfate synthase 1	HMW only	-	+	-	-	-	-	-	-	-	-
1121	Q9BWP8	Collectin-11	HMW only	HMW only	+	-	-	+	+	+	-	+	+
1122	P0DJD9	Pepsin A-5	HMW only	-	-	-	-	-	-	+	-	+	-
1123	A4D1P6	WD repeat-containing protein 91	HMW only	-	+	-	-	-	-	-	-	-	-
1124	P14210	Hepatocyte growth factor	HMW only	-	+	-	-	-	+	-	-	+	-
1125	Q99715	Collagen alpha-1(XII) chain	HMW only	HMW only	+	-	-	-	-	+	-	+	+
1126	Q9Y279	V-set and immunoglobulin domain-containing protein 4	HMW only	HMW only	+	-	-	-	-	-	-	-	+
1127	Q9HC38	Glyoxalase domain-containing protein 4	HMW only	HMW only	+	-	+	-	-	-	-	-	+
1128	Q8IX04	Ubiquitin-conjugating enzyme E2 variant 3	HMW only	-	-	-	-	-	-	-	-	-	-
1129	P20042	Eukaryotic translation initiation factor 2 subunit 2	HMW only	-	+	-	+	+	-	-	-	+	+
1130	P49915	GMP synthase [glutamine-hydrolyzing]	HMW only	-	+	-	+	-	-	-	-	-	-
1131	Q6P2Q9	Pre-mRNA-processing-splicing factor 8	HMW only	-	+	-	+	-	-	-	-	-	-
1132	P23246	Splicing factor, proline- and glutamine-rich	HMW only	-	+	+	+	-	-	-	-	+	+
1133	P27361	Mitogen-activated protein kinase 3	HMW only	-	+	-	+	-	-	-	-	-	+
1134	Q9HC56	Protocadherin-9	HMW only	-	+	-	-	-	-	-	-	-	+
1135	O94919	Endonuclease domain-containing 1 protein	HMW only	-	+	+	+	-	-	-	-	-	-
1136	A6NNA2	Serine/arginine repetitive matrix protein 3	HMW only	-	-	-	-	-	-	-	-	-	-
1137	Q99542	Matrix metalloproteinase-19	HMW only	-	+	-	-	-	-	-	-	+	+
1138	P09668	Pro-cathepsin H	HMW only	-	+	+	-	-	-	+	-	-	+
1139	Q7Z3B1	Neuronal growth regulator 1	HMW only	HMW only	+	-	-	+	-	+	-	-	+
1140	Q9NS71	Gastrokine-1	HMW only	-	+	-	-	+	-	-	-	+	-
1141	P83731	60S ribosomal protein L24	HMW only	LMW only	+	-	+	-	-	-	-	+	+
1142	Q6UWY5	Olfactomedin-like protein 1	HMW only	-	-	-	-	-	-	-	-	+	+
1143	P78552	Interleukin-13 receptor subunit alpha-1	HMW only	-	+	-	-	-	-	-	-	-	+
1144	P06703	Protein S100-A6	HMW only	HMW only	+	-	+	-	-	-	-	+	+
1145	Q14563	Semaphorin-3A	HMW only	HMW only	+	-	-	-	-	+	-	+	-
1146	P25788	Proteasome subunit alpha type-3	HMW only	-	+	+	+	-	-	-	-	+	+
1147	P35606	Coatomer subunit beta'	HMW only	-	+	+	+	-	-	-	-	+	+
1148	P15880	40S ribosomal protein S2	HMW only	LMW only	+	+	+	-	-	-	-	+	+
1149	P18085	ADP-ribosylation factor 4	HMW only	-	+	+	+	-	-	-	-	+	+
1150	P07911	Uromodulin	HMW only	HMW only	+	-	-	+	-	+	-	-	+
1151	Q10469	Alpha-1,6-mannosyl-glycoprotein 2-beta-N-acetylglucosaminyltransferase	HMW only	-	+	-	+	-	-	+	-	-	-
1152	O43707	Alpha-actinin-4	HMW only	HMW only	+	+	+	+	-	+	-	+	+
1153	P56199	Integrin alpha-1	HMW only	-	+	+	+	-	-	-	-	-	+
1154	Q16531	DNA damage-binding protein 1	HMW only	HMW only	+	+	+	-	-	-	-	+	+
1155	Q86XW9	Thioredoxin domain-containing protein 6	HMW only	-	+	-	-	-	-	-	-	-	-
1156	P0DMB2	Uncharacterized protein C8orf88	HMW only	-	-	-	-	-	-	-	-	-	-
1157	Q9H1E3	Nuclear ubiquitous casein and cyclin-dependent kinase substrate 1	HMW only	-	+	-	+	-	-	-	-	-	+
1158	Q66LE6	Serine/threonine-protein phosphatase 2A 55 kDa regulatory subunit B delta isoform	HMW only	-	-	-	-	-	-	-	-	-	-
1159	Q6GTS8	N-fatty-acyl-amino acid synthase/hydrolase PM20D1	HMW only	-	-	-	-	-	-	-	-	-	-
1160	Q13510	Acid ceramidase	HMW only	-	+	-	+	-	+	-	-	-	+
1161	Q15121	Astrocytic phosphoprotein PEA-15	HMW only	-	+	+	+	-	-	-	-	-	+
1162	Q14651	Plastin-1	HMW only	-	+	+	+	-	-	-	-	-	+
1163	Q16787	Laminin subunit alpha-3	HMW only	-	+	-	-	-	-	-	-	-	+
1164	Q7Z5H3	Rho GTPase-activating protein 22	LMW only	-	-	-	-	-	-	-	-	-	-
1165	Q96PE2	Rho guanine nucleotide exchange factor 17	LMW only	-	-	-	-	-	-	-	-	-	-
1166	Q2MV58	Tectonic-1	LMW only	-	-	-	-	-	-	-	-	-	-
1167	Q6UWM9	UDP-glucuronosyltransferase 2A3	LMW only	-	-	-	-	-	-	-	-	-	-
1168	Q9NXL2	Rho guanine nucleotide exchange factor 38	LMW only	-	-	-	-	-	-	-	-	-	-
1169	P01825	Immunoglobulin heavy variable 4-59	HMW only	HMW only	-	-	-	-	-	-	-	-	-
1170	A0A0G2JS06	Immunoglobulin lambda variable 5-39	HMW only	HMW only	-	-	-	-	-	-	+	+	+
1171	A0A075B6K0	Immunoglobulin lambda variable 3-16	HMW only	-	-	-	-	-	-	-	+	+	+
1172	O75643	U5 small nuclear ribonucleoprotein 200 kDa helicase	HMW only	-	+	-	+	-	-	-	-	-	+
1173	Q96JG9	Zinc finger protein 469	HMW only	-	+	-	-	-	-	-	-	-	-
1174	P78563	Double-stranded RNA-specific editase 1	HMW only	-	+	-	-	-	-	-	-	+	-
1175	A7KAX9	Rho GTPase-activating protein 32	HMW only	-	-	-	-	-	-	-	-	-	-
1176	Q9UL12	Sarcosine dehydrogenase, mitochondrial	HMW only	-	+	-	-	-	-	-	-	-	-
1177	P0DP06	Immunoglobulin heavy variable 4-30-4	HMW only	-	-	-	-	-	-	-	-	-	-
1178	P19012	Keratin, type I cytoskeletal 15	HMW only	-	+	-	-	-	-	-	-	-	-
1179	A0A0C4DH42	Immunoglobulin heavy variable 3-66	HMW only	-	-	-	-	-	-	-	+	-	+
1180	Q9P0G3	Kallikrein-14	HMW only	HMW only	+	-	-	-	-	-	-	-	-
1181	Q13286	Battenin	HMW only	-	+	-	-	-	-	-	-	-	-
1182	O75140	GATOR complex protein DEPDC5	HMW only	-	+	-	-	-	-	-	-	-	-
1182	A0A075B6S6	Immunoglobulin kappa variable 2D-30	-	HMW only	-	-	-	-	-	-	+	-	+
1182	Q7Z794	Keratin, type II cytoskeletal 1b	-	HMW only	+	-	-	-	-	+	-	-	+
1182	A0A0J9YXX1	Immunoglobulin heavy variable 5-10-1	-	HMW only	-	-	-	-	-	-	+	+	+
1182	Q8WWA0	Intelectin-1	-	HMW only	+	-	-	-	-	-	-	+	-
1182	A0A087WSY4	Immunoglobulin heavy variable 4-30-2	-	HMW only	-	-	-	-	-	-	-	-	-
1182	P21741	Midkine	-	HMW only	+	-	-	-	+	-	+	+	+
1182	Q6UWP8	Suprabasin	-	HMW only	+	oocyte specific	-	-	-	+	+	+	+
1182	P02538	Keratin, type II cytoskeletal 6A	-	+	+	-	+	-	-	+	+	-	+
1182	P67809	Nuclease-sensitive element-binding protein 1	-	HMW only	+	+	+	-	-	-	-	+	+
1182	Q14623	Indian hedgehog protein	-	HMW only	+	-	-	-	-	-	-	+	+
1182	Q02985	Complement factor H-related protein 3	-	HMW only	+	-	-	-	+	+	+	+	+
1182	P14866	Heterogeneous nuclear ribonucleoprotein L	-	HMW only	+	-	+	-	-	-	-	+	+
1182	P07099	Epoxide hydrolase 1	-	HMW only	-	+	+	-	-	-	-	+	+
1182	P12273	Prolactin-inducible protein	-	HMW only	+	oocyte specific	-	+	-	+	-	-	+
1182	Q12907	Vesicular integral-membrane protein VIP36	-	HMW only	+	-	+	-	-	+	-	+	+
1182	Q9Y240	C-type lectin domain family 11 member A	-	HMW only	+	-	-	-	-	-	-	+	+
1182	P06454	Prothymosin alpha	-	HMW only	+	-	+	-	-	-	-	-	+
1182	P15924	Desmoplakin	-	HMW only	+	+	+	+	-	+	+	+	+
1182	P01833	Polymeric immunoglobulin receptor	-	HMW only	+	-	-	-	-	+	-	+	+
1182	A0A0C4DH43	Immunoglobulin heavy variable 2-70D	-	HMW only	-	-	-	-	-	-	+	+	+
1182	A0A075B6K2	Immunoglobulin lambda variable 3-12	-	HMW only	-	-	-	-	-	-	+	-	+
1182	P60866	40S ribosomal protein S20	-	HMW only	+	+	+	-	-	-	-	+	+
1182	P26992	Ciliary neurotrophic factor receptor subunit alpha	-	HMW only	+	-	-	+	-	-	-	-	+
1182	Q96FE7	Phosphoinositide-3-kinase-interacting protein 1	-	HMW only	+	-	-	-	-	-	-	-	+
1182	P23490	Loricrin	-	HMW only	-	-	-	-	-	-	-	-	-
1182	O14792	Heparan sulfate glucosamine 3-O-sulfotransferase 1	-	HMW only	+	-	-	+	-	+	-	+	+
1182	A0A075B6I4	Immunoglobulin lambda variable 10-54	-	HMW only	-	-	-	-	-	-	+	+	+
1182	Q9Y6R7	IgGFc-binding protein	-	HMW only	+	-	-	+	-	-	-	-	+
1182	P01715	Immunoglobulin lambda variable 3-1	-	HMW only	-	-	-	-	-	-	-	+	+
1182	Q99877	Histone H2B type 1-N	-	LMW only	-	-	+	-	-	-	-	-	-
1182	A0A075B6J1	Immunoglobulin lambda variable 5-37	-	HMW only	-	-	-	-	-	-	+	-	+
1182	Q9Y6C2	EMILIN-1	-	HMW only	+	-	-	-	-	-	-	+	+
1182	Q4LDE5	Sushi, von Willebrand factor type A, EGF and pentraxin domain-containing protein 1	-	LMW only	+	-	-	-	-	-	-	+	+
1182	P51148	Ras-related protein Rab-5C	-	HMW only	+	+	+	-	-	-	-	-	+
1182	P30038	Delta-1-pyrroline-5-carboxylate dehydrogenase, mitochondrial	-	HMW only	+	+	+	-	-	-	-	-	-
1182	Q07954	Prolow-density lipoprotein receptor-related protein 1	-	HMW only	+	-	+	-	-	-	-	+	+
1182	P10321	HLA class I histocompatibility antigen, C alpha chain	-	HMW only	+	-	+	+	-	+	+	+	+
1182	P09619	Platelet-derived growth factor receptor beta	-	HMW only	+	-	-	-	-	-	-	-	+
1182	Q8NBJ4	Golgi membrane protein 1	-	HMW only	+	-	+	-	-	+	-	+	+
1182	P30740	Leukocyte elastase inhibitor	-	HMW only	+	-	+	-	-	+	-	-	+
1182	P14923	Junction plakoglobin	-	HMW only	+	+	+	+	-	+	+	+	+
1182	Q02413	Desmoglein-1	-	HMW only	+	+	-	+	-	+	-	+	+
1182	O00468	Agrin	-	HMW only	+	-	-	-	-	+	-	-	+
1182	P15104	Glutamine synthetase	-	HMW only	+	-	+	-	-	-	-	+	+
1182	P23471	Receptor-type tyrosine-protein phosphatase zeta	-	HMW only	+	-	-	+	-	-	-	-	+
1182	O15031	Plexin-B2	-	HMW only	+	-	-	-	-	-	-	-	+
1182	Q86WI1	Fibrocystin-L	-	HMW only	-	-	-	-	-	-	-	-	-
1182	Q13201	Multimerin-1	-	HMW only	+	-	-	-	-	+	-	-	+
1182	Q13308	Inactive tyrosine-protein kinase 7	-	HMW only	+	-	+	-	-	-	-	-	+
1182	Q92484	Acid sphingomyelinase-like phosphodiesterase 3a	-	HMW only	+	-	-	+	-	-	-	-	+
1182	Q14766	Latent-transforming growth factor beta-binding protein 1	-	HMW only	+	-	-	-	-	-	-	+	+
1182	Q14767	Latent-transforming growth factor beta-binding protein 2	-	+	+	-	-	-	-	-	-	+	+
1182	O00264	Membrane-associated progesterone receptor component 1	-	HMW only	+	-	+	-	-	-	-	+	+
1182	P09972	Fructose-bisphosphate aldolase C	-	HMW only	+	-	+	-	-	+	-	-	+
1182	P04083	Annexin A1	-	HMW only	+	-	+	-	-	+	+	-	+
1182	Q7Z5L0	Vitelline membrane outer layer protein 1 homolog	-	HMW only	+	-	-	-	-	-	-	-	-
1182	P29966	Myristoylated alanine-rich C-kinase substrate	-	HMW only	+	+	+	+	-	-	-	-	+
1182	Q9ULV4	Coronin-1C	-	HMW only	+	+	+	-	-	-	-	-	+
1182	P20023	Complement receptor type 2	-	HMW only	+	-	-	-	-	-	-	-	+
1182	Q01469	Fatty acid-binding protein 5	-	HMW only	+	-	+	+	-	+	+	-	+
1182	P54764	Ephrin type-A receptor 4	-	HMW only	+	-	-	+	-	+	-	-	+
1182	P20930	Filaggrin	-	HMW only	+	-	+	-	-	-	-	-	+
1182	Q71UI9	Histone H2A.V	-	HMW only	-	-	+	-	-	-	-	+	+
1182	O14745	Na(+)/H(+) exchange regulatory cofactor NHE-RF1	-	LMW only	+	+	+	-	-	-	-	-	+
1182	Q99880	Histone H2B type 1-L	-	HMW only	+	-	+	-	-	-	-	+	-
1182	P07108	Acyl-CoA-binding protein	-	HMW only	+	+	+	-	-	-	-	-	+
1182	P10412	Histone H1.4	-	LMW only	+	-	+	-	-	-	-	-	-
1182	P08493	Matrix Gla protein	-	LMW only	+	-	-	-	-	-	-	+	+
1182	A0A1B0GTC6	Uncharacterized protein C3orf85	-	LMW only	-	-	-	-	-	-	-	-	-
1182	O95810	Caveolae-associated protein 2	-	LMW only	+	-	-	-	-	-	-	-	-
1182	Q12929	Epidermal growth factor receptor kinase substrate 8	-	LMW only	+	-	+	-	-	-	-	-	+
1182	P63313	Thymosin beta-10	-	+	+	-	+	-	-	-	-	-	+
1182	Q86V81	THO complex subunit 4	-	LMW only	+	-	+	-	-	-	-	+	+
1182	P05114	Non-histone chromosomal protein HMG-14	-	LMW only	+	-	+	-	-	-	-	-	+
1182	P62328	Thymosin beta-4	-	+	+	-	+	+	-	-	-	-	+
1182	P01040	Cystatin-A	-	HMW only	+	+	+	-	-	+	-	-	+
1182	P26373	60S ribosomal protein L13	-	LMW only	+	-	+	-	-	-	-	+	+
1182	P62241	40S ribosomal protein S8	-	LMW only	+	+	+	-	-	-	-	+	+
1182	Q93079	Histone H2B type 1-H	-	LMW only	+	-	+	-	-	-	-	-	-
1182	P68133	Actin alpha skeletal muscle	-	HMW only	+	-	+	-	-	+	-	-	-
1182	A0A0B4J1Z2	Immunoglobulin kappa variable 1D-43	-	HMW only	-	-	-	-	-	-	-	-	-
1182	Q58FF8	Putative heat shock protein HSP 90-beta 2	-	HMW only	-	+	+	-	-	-	-	+	-
1182	P58876	Histone H2B type 1-D	-	LMW only	+	-	+	-	-	-	-	-	-
1182	Q16777	Histone H2A type 2-C	-	HMW only	-	-	+	-	-	+	-	-	+
1182	P02776	Platelet factor 4	-	HMW only	+	-	-	-	-	-	-	+	-
1182	A0A0C4DH39	Immunoglobulin heavy variable 1-58	-	HMW only	-	-	-	-	-	-	-	-	+
1182	Q5TFQ8	Signal-regulatory protein beta-1 isoform 3	-	HMW only	+	-	-	-	-	-	-	-	-
1182	P17693	HLA class I histocompatibility antigen alpha chain G	-	LMW only	+	-	+	-	+	-	-	+	-
1182	A0A0A0MRZ7	Immunoglobulin kappa variable 2D-26	-	HMW only	-	-	-	-	-	-	-	-	-
1182	P05787	Keratin type II cytoskeletal 8	-	LMW only	+	-	+	-	-	-	-	-	+
1182	Q8WUT4	Leucine-rich repeat neuronal protein 4	-	HMW only	+	-	-	-	-	-	-	-	-
1182	P14384	Carboxypeptidase M	-	HMW only	+	+	+	+	-	-	-	-	+
1182	Q16778	Histone H2B type 2-E	-	LMW only	-	-	+	-	-	-	-	-	+
1182	P18124	60S ribosomal protein L7	-	LMW only	+	+	+	-	-	-	-	+	+
1182	P62861	40S ribosomal protein S30	-	LMW only	-	-	+	-	-	-	-	-	+
1182	Q9UBG3	Cornulin	-	LMW only	-	-	+	-	-	-	+	+	+
1182	O60282	Kinesin heavy chain isoform 5C	-	HMW only	+	-	-	-	-	-	-	-	-
1182	Q15155	Nodal modulator 1	-	HMW only	+	+	+	-	-	+	-	-	-
1182	P31997	Carcinoembryonic antigen-related cell adhesion molecule 8	-	HMW only	+	-	-	-	-	-	-	-	-
1182	P17066	Heat shock 70 kDa protein 6	-	HMW only	+	-	+	-	-	-	-	+	+
1182	Q9HBR0	Putative sodium-coupled neutral amino acid transporter 10	-	HMW only	+	-	+	-	-	+	-	-	+
1182	P10163	Basic salivary proline-rich protein 4	-	HMW only	+	-	-	-	-	-	-	-	-
1182	Q6PL18	ATPase family AAA domain-containing protein 2	-	HMW only	-	-	-	-	-	-	-	-	-
1182	Q9NP78	ATP-binding cassette sub-family B member 9	-	HMW only	+	-	-	-	-	-	-	-	+
1182	Q03181	Peroxisome proliferator-activated receptor delta	-	HMW only	-	-	-	-	-	-	-	-	-
1182	P48552	Nuclear receptor-interacting protein 1	-	HMW only	+	-	-	-	-	-	-	-	-
1182	Q8TDL5	BPI fold-containing family B member 1	-	HMW only	+	-	-	-	-	-	-	-	+
1182	Q8NFU7	Methylcytosine dioxygenase TET1	-	HMW only	+	-	-	-	-	-	-	-	-
1182	Q16627	C-C motif chemokine 14	-	HMW only	+	-	-	+	-	-	-	+	+
1182	Q3V6T2	Girdin	-	HMW only	+	-	-	-	-	-	-	-	-
1182	P28799	Progranulin	-	HMW only	+	+	+	-	-	-	-	+	+
1182	Q6ICB0	Desumoylating isopeptidase 1	-	HMW only	-	-	-	-	-	-	-	-	-
1182	P10451	Osteopontin	-	HMW only	+	-	-	-	-	+	-	+	+
1182	Q13439	Golgin subfamily A member 4	-	HMW only	+	+	+	-	-	-	-	-	-
1182	P46777	60S ribosomal protein L5	-	HMW only	+	-	+	-	-	-	-	+	+
1182	O00461	Golgi integral membrane protein 4	-	HMW only	+	-	+	-	-	-	-	-	-
1182	P27824	Calnexin	-	HMW only	+	+	+	-	-	-	-	+	+
1182	P46093	G-protein coupled receptor 4	-	HMW only	+	-	-	-	-	-	-	-	-
1182	Q8IX95	Putative cTAGE family member 3	-	HMW only	-	-	-	-	-	-	-	-	-
1182	Q5JPH6	Probable glutamate--tRNA ligase, mitochondrial	-	HMW only	-	-	-	-	-	-	-	-	-
1182	Q8N441	Fibroblast growth factor receptor-like 1	-	HMW only	-	-	-	+	-	-	-	+	+
1182	P27930	Interleukin-1 receptor type 2	-	HMW only	+	-	-	-	-	+	-	-	+
1182	Q96PF1	Protein-glutamine gamma-glutamyltransferase Z	-	HMW only	+	oocyte specific	-	-	-	-	-	-	-
1182	Q9BVC6	Transmembrane protein 109	-	HMW only	-	-	+	-	-	-	-	-	-
1182	P04156	Major prion protein	-	HMW only	+	-	-	-	-	-	-	-	+
1182	A5D6W6	Fat storage-inducing transmembrane protein 1	-	HMW only	+	-	-	-	-	-	-	-	-
1182	P23588	Eukaryotic translation initiation factor 4B	-	HMW only	+	-	+	-	-	-	-	+	+
1182	Q13275	Semaphorin-3F	-	HMW only	+	-	-	+	-	-	-	-	+
1182	P46939	Utrophin	-	HMW only	+	-	+	-	-	-	-	-	-
1182	Q99972	Myocilin	-	HMW only	+	-	-	-	+	+	-	-	+
1182	P09493	Tropomyosin alpha-1 chain	-	HMW only	+	-	+	-	-	-	-	+	+
1182	Q96RW7	Hemicentin-1	-	HMW only	+	-	+	-	-	-	-	-	+
1182	P19086	Guanine nucleotide-binding protein G(z) subunit alpha	-	HMW only	+	-	-	-	-	-	-	-	-
1182	P04062	Lysosomal acid glucosylceramidase	-	HMW only	+	-	+	-	-	-	-	+	-
1182	P14868	Aspartate--tRNA ligase, cytoplasmic	-	HMW only	+	+	+	-	-	-	-	+	+
1182	Q1MX18	Protein inscuteable homolog	-	HMW only	-	-	-	-	-	-	-	-	-
1182	Q96DA6	Mitochondrial import inner membrane translocase subunit TIM14	-	HMW only	-	+	+	-	-	-	-	-	-
1182	Q8N9R8	Protein SCAI	-	HMW only	-	-	-	-	-	-	-	-	-
1182	Q9UBG0	C-type mannose receptor 2	-	HMW only	+	-	+	+	-	-	-	-	+
1182	Q04917	14-3-3 protein eta	-	HMW only	+	+	+	+	-	-	-	+	+
1182	Q7Z2Z1	Treslin	-	HMW only	-	-	-	-	-	-	-	-	-
1182	Q86W28	NACHT, LRR and PYD domains-containing protein 8	-	HMW only	-	oocyte specific	-	-	-	-	-	-	-
1182	Q8IX30	Signal peptide, CUB and EGF-like domain-containing protein 3	-	HMW only	-	-	-	-	-	-	-	-	-
1182	P98172	Ephrin-B1	-	HMW only	+	-	+	-	-	+	-	-	+
1182	Q9Y6N7	Roundabout homolog 1	-	HMW only	+	-	+	+	-	-	-	-	+
1182	Q15223	Nectin-1	-	HMW only	+	-	-	+	-	-	-	-	+
1182	P27105	Erythrocyte band 7 integral membrane protein	-	HMW only	+	+	+	-	-	-	+	-	-
1182	A6NMB1	Sialic acid-binding Ig-like lectin 16	-	HMW only	-	-	-	-	-	-	-	-	+
1182	Q9Y3D6	Mitochondrial fission 1 protein	-	HMW only	+	+	+	-	-	-	-	-	-
1182	O95236	Apolipoprotein L3	-	HMW only	+	-	-	-	-	-	-	-	-
1182	Q9NRX4	14 kDa phosphohistidine phosphatase	-	HMW only	-	-	+	-	-	-	-	-	+
1182	P02810	Salivary acidic proline-rich phosphoprotein 1/2	-	HMW only	-	-	-	-	-	-	-	-	-
1182	Q58FF6	Putative heat shock protein HSP 90-beta 4	-	HMW only	-	-	+	-	-	-	-	-	-
1182	P47756	F-actin-capping protein subunit beta	-	HMW only	+	-	+	+	-	-	-	+	+
1182	P12883	Myosin-7	-	HMW only	+	-	-	-	-	-	-	-	-
1182	Q9HBB8	Cadherin-related family member 5	-	HMW only	+	-	-	+	-	-	-	-	+
1182	Q96K17	Transcription factor BTF3 homolog 4	-	LMW only	-	+	+	-	-	-	-	-	+
1182	Q7Z3Z2	Protein RD3	-	LMW only	-	-	-	-	-	-	-	-	-
1182	Q96T60	Bifunctional polynucleotide phosphatase/kinase	-	LMW only	+	-	+	-	-	-	-	-	-
1182	A8MYJ7	Tetratricopeptide repeat protein 34	-	LMW only	-	-	-	-	+	-	-	-	-
1182	Q8TD84	Down syndrome cell adhesion molecule-like protein 1	-	LMW only	-	-	-	-	-	-	-	-	-
1182	Q9UKZ1	CCR4-NOT transcription complex subunit 11	-	LMW only	-	+	-	-	-	-	-	-	-
1182	Q86VR2	Reticulophagy regulator 3	-	LMW only	-	+	+	-	-	-	-	-	-
1182	Q5T0Z8	Uncharacterized protein C6orf132	-	LMW only	-	-	-	-	-	-	-	-	-
1182	P10515	Dihydrolipoyllysine-residue acetyltransferase component of pyruvate dehydrogenase complex, mitochondrial	-	LMW only	+	+	+	-	-	-	-	-	-
1182	Q8N9W4	Golgin subfamily A member 6-like protein 2	-	LMW only	-	-	-	-	-	-	-	-	-
1182	Q5T4S7	E3 ubiquitin-protein ligase UBR4	-	LMW only	+	-	+	-	-	-	-	-	-
1182	P46059	Solute carrier family 15 member 1	-	LMW only	+	-	-	-	-	-	-	-	-
1182	O43313	ATM interactor	-	LMW only	+	-	-	-	-	-	-	-	-
1182	Q07020	60S ribosomal protein L18	-	LMW only	+	-	+	-	-	-	-	+	+
1182	Q86YV0	RAS protein activator like-3	-	LMW only	-	-	-	-	-	-	-	-	-
1182	O43491	Band 4.1-like protein 2	-	LMW only	+	+	+	-	-	-	-	+	+
1182	P62753	40S ribosomal protein S6	-	LMW only	+	-	+	-	-	-	-	+	+
1182	A1L4H1	Soluble scavenger receptor cysteine-rich domain-containing protein SSC5D	-	LMW only	-	-	-	-	-	-	-	-	-
1182	B2RXH4	BTB/POZ domain-containing protein 18	-	LMW only	-	-	-	-	-	-	-	-	-
1182	P41229	Lysine-specific demethylase 5C	-	LMW only	+	-	-	-	-	-	-	-	-
1182	Q9NYP7	Elongation of very long chain fatty acids protein 5	-	LMW only	+	-	+	-	-	-	-	-	-
1182	O15027	Protein transport protein Sec16A	-	LMW only	+	-	+	-	-	-	-	-	-
1182	P50914	60S ribosomal protein L14	-	LMW only	+	-	+	-	-	-	-	+	+
1182	P62277	40S ribosomal protein S13	-	LMW only	+	+	+	-	-	-	-	+	+
1182	P62847	40S ribosomal protein S24	-	LMW only	+	+	+	-	-	-	-	+	-
1182	Q99550	M-phase phosphoprotein 9	-	LMW only	+	-	-	-	-	-	-	-	-
1182	P51826	AF4/FMR2 family member 3	-	LMW only	+	-	-	-	-	-	-	-	-
1182	Q15046	Lysine--tRNA ligase	-	LMW only	+	+	+	-	-	-	-	-	+
1182	P62899	60S ribosomal protein L31	-	LMW only	+	-	+	-	-	-	-	+	-
1182	Q76M96	Coiled-coil domain-containing protein 80	-	LMW only	+	-	-	-	-	-	-	+	-
1182	P47929	Galectin-7	-	LMW only	+	-	+	-	+	-	+	-	+
1182	Q86U42	Polyadenylate-binding protein 2	-	LMW only	+	-	+	-	-	-	-	-	+
1182	P62280	40S ribosomal protein S11	-	LMW only	+	+	+	-	-	-	-	+	+
1182	Q15651	High mobility group nucleosome-binding domain-containing protein 3	-	LMW only	+	-	+	-	-	-	-	-	-
1182	Q96S97	Myeloid-associated differentiation marker	-	LMW only	+	-	+	-	-	-	-	-	-
1182	P62917	60S ribosomal protein L8	-	LMW only	+	+	+	-	-	-	-	+	+

## Sheet: Table S9
Table S9. Assignment of clinical samples of retrieved follicular fluids to patient, status of oocyte maturity, and result of embryo culture of fertilized oocytes to the blastocyst stage.
Follicle	Patient	Oocyte status	Blastocyst status
P1F1	1	mature	not developed
P1F2	1	mature	developed
P1F3	1	mature	not developed
P1F4	1	mature	developed
P1F5	1	immature	-
P2F1	2	mature	not developed
P2F2	2	mature	developed
P2F3	2	mature	developed
P2F4	2	mature	not developed
P2F5	2	immature	-
P3F1	3	mature	not developed
P3F2	3	immature	-
P3F3	3	mature	developed
P3F4	3	mature	developed
P3F5	3	mature	developed
P4F1	4	mature	developed
P4F2	4	immature	-
P4F3	4	mature	developed
P4F4	4	mature	not developed
P4F5	4	immature	-

## Sheet: Table S10
Table S10. The results of quantitative analysis of clinical samples by the Quad-Orbitrap workflow along with TPA absolute concentration calculation.
Uniprot ID	Intensity P1F1	Intensity P1F2	Intensity P1F3	Intensity P1F4	Intensity P1F5	Intensity P2F1	Intensity P2F2	Intensity P2F3	Intensity P2F4	Intensity P2F5	Intensity P3F1	Intensity P3F2	Intensity P3F3	Intensity P3F4	Intensity P3F5	Intensity P4F1	Intensity P4F2	Intensity P4F3	Intensity P4F4	Intensity P4F5	TP P1F1	TP P1F2	TP P1F3	TP P1F4	TP P1F5	TP P2F1	TP P2F2	TP P2F3	TP P2F4	TP P2F5	TP P3F1	TP P3F2	TP P3F3	TP P3F4	TP P3F5	TP P4F1	TP P4F2	TP P4F3	TP P4F4	TP P4F5	Concentration [pmol/mg] P1F1	Concentration [pmol/mg] P1F2	Concentration [pmol/mg] P1F3	Concentration [pmol/mg] P1F4	Concentration [pmol/mg] P1F5	Concentration [pmol/mg] P2F1	Concentration [pmol/mg] P2F2	Concentration [pmol/mg] P2F3	Concentration [pmol/mg] P2F4
Q9ULM0	59892000	87557000	93668000	30330000	59121000	136350000	146400000	175610000	115200000	178460000	156540000	63347000	56401000	68781000	96880000	43917000	80898000	208100000	113670000	113720000	3.67071e-06	5.43166e-06	6.20058e-06	2.13642e-06	4.43311e-06	8.03118e-06	1.01475e-05	1.28197e-05	6.91833e-06	1.26925e-05	1.04201e-05	3.86713e-06	3.65586e-06	4.66916e-06	7.00478e-06	3.36526e-06	5.84497e-06	1.83549e-05	9.107e-06	8.4559e-06	0.0242724	0.0359165	0.041001	0.0141269	0.0293137	0.0531057	0.0670997	0.0847694	0.0457471
P14174	6706600	52518000	35621000	41470000	176440000	93470000	28019000	30294000	21921000	71584000	30019000	312900000	53916000	23365000	21254000	32545000	7835900	7457800	24191000	13651000	4.1104e-07	3.25799e-06	2.35802e-06	2.92111e-06	1.32301e-05	5.50549e-06	1.94209e-06	2.21149e-06	1.31646e-06	5.09121e-06	1.99822e-06	1.91016e-05	3.49478e-06	1.58612e-06	1.53674e-06	2.49385e-06	5.66152e-07	6.57797e-07	1.93813e-06	1.01505e-06	0.0329464	0.261141	0.189004	0.234138	1.06044	0.441287	0.155666	0.177259	0.10552
O14792	68232000	87249000	79534000	54853000	44680000	84711000	38170000	12041000	43307000	8915500	0	75458000	50417000	45586000	20314000	15468000	9140100	20663000	25538000	13606000	4.18186e-06	5.41255e-06	5.26494e-06	3.8638e-06	3.35027e-06	4.98958e-06	2.64569e-06	8.79003e-07	2.6008e-06	6.3409e-07	0	4.60647e-06	3.26798e-06	3.09458e-06	1.46878e-06	1.18528e-06	6.60382e-07	1.82253e-06	2.04605e-06	1.0117e-06	0.1169	0.151303	0.147176	0.108009	0.0936536	0.139479	0.0739579	0.0245717	0.0727028
P07864	2884600000	2254600000	238780000	2076700000	1784300000	1958800000	2387000000	2007200000	2268700000	1580200000	2170100000	2604700000	2098500000	2509000000	1761000000	2177600000	1880400000	745760000	1892500000	1785200000	0.000176794	0.000139866	1.58066e-05	0.000146281	0.000133793	0.000115376	0.000165451	0.000146527	0.000136247	0.000112387	0.000144453	0.000159009	0.000136023	0.000170322	0.000127327	0.000166865	0.000135861	6.57779e-05	0.000151623	0.000132742	4.86888	3.85188	0.435312	4.02855	3.68465	3.17743	4.5565	4.03534	3.75221
Q8TD57	558360000	502670000	702840000	144440000	92392000	854460000	115720000	103030000	628000000	147530000	459680000	931620000	474500000	234090000	360080000	92960000	471340000	287630000	263980000	68785000	3.42212e-05	3.11835e-05	4.65262e-05	1.01742e-05	6.92789e-06	5.03287e-05	8.02095e-06	7.52127e-06	3.77145e-05	1.04927e-05	3.05987e-05	5.68725e-05	3.07566e-05	1.58911e-05	2.60351e-05	7.12332e-06	3.40548e-05	2.53697e-05	2.11495e-05	5.11466e-06	0.0726921	0.0662393	0.0988299	0.0216119	0.0147161	0.106907	0.0170379	0.0159765	0.0801123
Q96RL7	1146500000	1281400000	1745800000	681580000	826730000	1430500000	1194100000	680280000	1073000000	346200000	422380000	582570000	1214800000	774250000	983710000	1660700000	346740000	200430000	299430000	1712100000	7.02677e-05	7.94925e-05	0.000115567	4.80099e-05	6.19912e-05	8.42581e-05	8.27672e-05	4.9661e-05	6.44389e-05	2.46225e-05	2.81158e-05	3.55641e-05	7.87421e-05	5.25595e-05	7.11259e-05	0.000127256	2.50523e-05	1.76784e-05	2.39897e-05	0.000127307	0.195042	0.220647	0.32078	0.133261	0.172069	0.233875	0.229737	0.137844	0.178863
Q8NFU7	44730000000	27020000000	42863000000	50322000000	59202000000	27131000000	67883000000	68709000000	26651000000	75179000000	46338000000	32356000000	29610000000	65320000000	74114000000	74338000000	53548000000	76630000000	79908000000	66731000000	0.00274145	0.0016762	0.00283742	0.00354464	0.00443918	0.00159805	0.00470521	0.00501581	0.00160052	0.0053469	0.0030845	0.00197523	0.00191929	0.00443421	0.00535872	0.00569636	0.0038689	0.00675896	0.00640206	0.00496193	11.6504	7.12339	12.0582	15.0637	18.8652	6.79125	19.9958	21.3158	6.80177
P13473	111030000	103920000	117260000	0	0	100620000	25888000	24414000	125200000	20751000	123210000	104510000	93666000	96870000	32150000	20538000	0	18257000	15963000	109650000	6.8049e-06	6.44675e-06	7.76231e-06	0	0	5.92664e-06	1.79439e-06	1.78224e-06	7.51888e-06	1.47586e-06	8.2015e-06	6.38001e-06	6.07134e-06	6.57596e-06	2.32456e-06	1.57378e-06	0	1.61031e-06	1.27892e-06	8.15327e-06	0.151355	0.143389	0.172649	0	0	0.13182	0.0399107	0.0396406	0.167235
P61254	2074200000	546600000	161880000	1623800000	410080000	185460000	69282000	0	576000000	0	400610000	182870000	213090000	24617000	16575000	449120000	8135800	16102000	0	0	0.000127125	3.39087e-05	1.0716e-05	0.000114379	3.07493e-05	1.09238e-05	4.80217e-06	0	3.45916e-05	0	2.66667e-05	1.11636e-05	1.38123e-05	1.67111e-06	1.19843e-06	3.44151e-05	5.87821e-07	1.42024e-06	0	0	7.36617	1.96481	0.620931	6.62759	1.78174	0.632971	0.278258	0	2.00438
P52790	188150000	171820000	229890000	0	134950000	170940000	30101000	19742000	34348000	131720000	111140000	120560000	167760000	5559700	177120000	0	0	140810000	0	234060000	1.15315e-05	1.0659e-05	1.52181e-05	0	1.0119e-05	1.00686e-05	2.0864e-06	1.44118e-06	2.06277e-06	9.36822e-06	7.39806e-06	7.35981e-06	1.0874e-05	3.77417e-07	1.28064e-05	0	0	1.24198e-05	0	1.7404e-05	0.116452	0.10764	0.153681	0	0.102188	0.101678	0.0210697	0.0145539	0.020831
Q9HC77	142410000	222920000	129200000	135720000	121990000	36181000	29293000	0	29006000	0	47644000	89199000	94542000	50941000	51958000	32214000	36413000	1625700	0	30722000	8.72814e-06	1.3829e-05	8.5527e-06	9.55999e-06	9.14725e-06	2.1311e-06	2.0304e-06	0	1.74195e-06	0	3.17143e-06	5.44532e-06	6.12812e-06	3.4581e-06	3.75676e-06	2.46849e-06	2.63088e-06	1.43391e-07	0	2.2844e-06	0.0570467	0.0903856	0.0559	0.0624836	0.059786	0.0139288	0.0132706	0	0.0113853
O00292	144070000	156040000	138840000	124070000	73183000	47162000	0	47937000	77532000	0	179190000	137340000	127030000	250640000	130710000	0	9846500	14735000	0	0	8.82988e-06	9.68005e-06	9.19085e-06	8.73938e-06	5.48753e-06	2.7779e-06	0	3.49944e-06	4.65618e-06	0	1.19278e-05	8.38417e-06	8.23396e-06	1.70145e-05	9.45082e-06	0	7.1142e-07	1.29966e-06	0	0	0.215784	0.23656	0.224605	0.213572	0.134104	0.0678861	0	0.085519	0.113787
P19961	67792000	60123000	50893000	40989000	48217000	6005500	37574000	32334000	47767000	45788000	60181000	7817100	42156000	33874000	48685000	54354000	45058000	43069000	45363000	73163000	4.15489e-06	3.72977e-06	3.36898e-06	2.88723e-06	3.61549e-06	3.53731e-07	2.60438e-06	2.36041e-06	2.86864e-06	3.25654e-06	4.00596e-06	4.77209e-07	2.73251e-06	2.29952e-06	3.52011e-06	4.16503e-06	3.25549e-06	3.79879e-06	3.63439e-06	5.4402e-06	0.0719973	0.0646307	0.0583788	0.0500308	0.0626503	0.00612956	0.0451296	0.0409019	0.0497088
P12277	0	219420000	125350000	0	125200000	0	115610000	0	169020000	44077000	101670000	215050000	54049000	74447000	77288000	51003000	0	0	35303000	64809000	0	1.36119e-05	8.29784e-06	0	9.38795e-06	0	8.01333e-06	0	1.01505e-05	3.13485e-06	6.76768e-06	1.31281e-05	3.5034e-06	5.05379e-06	5.58821e-06	3.90825e-06	0	0	2.8284e-06	4.81902e-06	0	0.319198	0.194584	0	0.220147	0	0.187912	0	0.238028
P59998	64192000	36960000	35510000	50655000	47237000	52281000	43267000	33390000	35582000	54954000	38385000	63680000	58935000	0	34458000	35972000	36941000	21843000	19117000	35438000	3.93425e-06	2.29284e-06	2.35067e-06	3.56809e-06	3.542e-06	3.07941e-06	2.99899e-06	2.4375e-06	2.13687e-06	3.90845e-06	2.5551e-06	3.88746e-06	3.82011e-06	0	2.49144e-06	2.75645e-06	2.66903e-06	1.92661e-06	1.53161e-06	2.63507e-06	0.200043	0.116583	0.119524	0.181425	0.180099	0.156578	0.152488	0.123938	0.108653
Q10588	102330000	81937000	91224000	97210000	96449000	22116000	24273000	0	0	0	21997000	28215000	24889000	27780000	22890000	56138000	141510000	47146000	0	79999000	6.27169e-06	5.08302e-06	6.03879e-06	6.84738e-06	7.2321e-06	1.30266e-06	1.68245e-06	0	0	0	1.46423e-06	1.72244e-06	1.61328e-06	1.88583e-06	1.65503e-06	4.30173e-06	1.02243e-05	4.1584e-06	0	5.9485e-06	0.175559	0.142286	0.16904	0.191675	0.202444	0.0364645	0.0470957	0	0
Q02809	48604000	31485000	39558000	40903000	78907000	114190000	93751000	22390000	45044000	17658000	0	60373000	45959000	72444000	0	28846000	29888000	27537000	0	0	2.97888e-06	1.95319e-06	2.61864e-06	2.88117e-06	5.91673e-06	6.72593e-06	6.49821e-06	1.63449e-06	2.70511e-06	1.25588e-06	0	3.68558e-06	2.97902e-06	4.91782e-06	0	2.21041e-06	2.15944e-06	2.42883e-06	0	0	0.0356543	0.0233778	0.0313425	0.0344848	0.0708175	0.0805028	0.0777772	0.0195632	0.0323776
Q92736	2984700000	0	2870800000	11403000	0	0	1808100000	0	3630500000	75000000	849900000	2892700000	2405100000	1893900000	1514600000	56813000	7242100	0	0	2407100000	0.000182929	0	0.000190039	8.03217e-07	0	0	0.000125326	0	0.000218029	5.33416e-06	5.65738e-05	0.00017659	0.000155896	0.000128566	0.000109511	4.35345e-06	5.2325e-07	0	0	0.000178985	0.32402	0	0.336615	0.00142273	0	0	0.221988	0	0.386193
Q16769	44327000	45763000	25934000	52242000	20506000	76207000	51587000	35541000	111460000	37252000	32561000	87187000	49483000	48192000	47587000	13811000	42491000	21856000	25187000	24936000	2.71675e-06	2.83894e-06	1.71676e-06	3.67988e-06	1.53761e-06	4.48868e-06	3.57567e-06	2.59452e-06	6.69372e-06	2.64944e-06	2.16743e-06	5.32249e-06	3.20744e-06	3.27148e-06	3.44072e-06	1.05831e-06	3.07002e-06	1.92775e-06	2.01793e-06	1.85417e-06	0.0664632	0.0694525	0.0419993	0.0900254	0.0376166	0.109812	0.0874761	0.063473	0.163757
P23352	30487000	17055000	30174000	0	0	40438000	0	0	3618900	0	29007000	5986200	0	2575800	19521000	12949000	25213000	18505000	2197600	25183000	1.86851e-06	1.05802e-06	1.99744e-06	0	0	2.38185e-06	0	0	2.17333e-07	0	1.93086e-06	3.65439e-07	0	1.74857e-07	1.41144e-06	9.92253e-07	1.82167e-06	1.63219e-06	1.76067e-07	1.87254e-06	0.0245498	0.013901	0.0262438	0	0	0.0312944	0	0	0.00285547
P07910	0	0	0	67046000	89521000	21720000	23120000	23989000	22877000	30734000	29249000	45906000	39204000	35507000	50899000	0	58479000	0	16216000	0	0	0	0	4.72266e-06	6.71261e-06	1.27933e-06	1.60253e-06	1.75122e-06	1.37388e-06	2.18587e-06	1.94697e-06	2.80242e-06	2.54116e-06	2.41037e-06	3.68019e-06	0	4.22517e-06	0	1.29919e-06	0	0	0	0	0.140263	0.199365	0.0379962	0.0475951	0.0520112	0.0408042
Q8WZ75	61624000	32885000	77005000	72542000	74346000	0	68870000	30331000	56340000	33187000	19763000	0	0	34366000	32634000	63306000	36785000	32964000	32824000	77168000	3.77686e-06	2.04004e-06	5.09753e-06	5.10979e-06	5.57473e-06	0	4.77362e-06	2.21419e-06	3.38349e-06	2.36033e-06	1.31553e-06	0	0	2.33291e-06	2.35956e-06	4.851e-06	2.65776e-06	2.90751e-06	2.62979e-06	5.738e-06	0.0351467	0.0189842	0.0474365	0.0475506	0.0518773	0	0.0444223	0.0206048	0.0314861
Q68BL8	9270300	5807600	7761500	6358800	7079900	10407000	4818200	2628900	3982500	3286200	5894500	13641000	11113000	12893000	10862000	12915000	6820900	19442000	16515000	17589000	5.68166e-07	3.60278e-07	5.13791e-07	4.47908e-07	5.30877e-07	6.12985e-07	3.33966e-07	1.91912e-07	2.39169e-07	2.33722e-07	3.92369e-07	8.3274e-07	7.20334e-07	8.75233e-07	7.85363e-07	9.89648e-07	4.92818e-07	1.71483e-06	1.32315e-06	1.30787e-06	0.00676404	0.00428913	0.00611671	0.00533237	0.00632011	0.00729761	0.00397588	0.00228472	0.00284731
Q9NPR2	35152000	46150000	26894000	0	31862000	67659000	36866000	24645000	52674000	22442000	63391000	0	49399000	51472000	37196000	36922000	37211000	19881000	24259000	46908000	2.15443e-06	2.86295e-06	1.78031e-06	0	2.38913e-06	3.98519e-06	2.55531e-06	1.7991e-06	3.16333e-06	1.59612e-06	4.21963e-06	0	3.20199e-06	3.49414e-06	2.68941e-06	2.82925e-06	2.68854e-06	1.75355e-06	1.94358e-06	3.48795e-06	0.0232246	0.0308624	0.0191916	0	0.0257546	0.0429601	0.0275461	0.0193942	0.0341005
Q92859	9215600	22005000	7885000	12570000	36259000	0	19805000	17384000	0	14885000	0	23335000	0	23805000	29029000	29928000	6739900	13715000	8874800	10185000	5.64813e-07	1.3651e-06	5.21966e-07	8.85419e-07	2.71883e-06	0	1.37275e-06	1.26905e-06	0	1.05865e-06	0	1.42453e-06	0	1.61599e-06	2.0989e-06	2.29332e-06	4.86965e-07	1.2097e-06	7.1103e-07	7.57328e-07	0.00352986	0.00853131	0.00326209	0.00553352	0.0169916	0	0.00857917	0.00793104	0
P06732	110010000	39730000	66890000	228910000	22444000	1240700000	682590000	558760000	898140000	637350000	1552100000	389530000	91292000	1535100000	2170700000	1540800000	1209000000	1439900000	1549900000	314730000	6.74239e-06	2.46468e-06	4.42794e-06	1.61242e-05	1.68293e-06	7.30787e-05	4.73127e-05	4.07899e-05	5.39377e-05	4.53297e-05	0.000103316	2.37796e-05	5.91746e-06	0.000104209	0.00015695	0.000118068	8.73516e-05	0.000127003	0.000124175	2.34024e-05	0.156432	0.0571838	0.102734	0.374103	0.0390463	1.69552	1.09772	0.94638	1.25143
Q96SM3	85494000	66124000	51815000	66576000	0	171720000	68428000	57936000	66320000	45048000	122840000	135020000	0	13642000	18253000	39701000	0	14421000	50615000	86155000	5.23983e-06	4.10205e-06	3.43002e-06	4.68955e-06	0	1.01145e-05	4.74298e-06	4.22937e-06	3.98284e-06	3.20391e-06	8.17687e-06	8.24254e-06	0	9.26079e-07	1.31976e-06	3.0422e-06	0	1.27197e-06	4.05517e-06	6.40625e-06	0.0641609	0.050229	0.042	0.0574229	0	0.123851	0.0580771	0.051788	0.0487693
P15291	44420000	53925000	72638000	43462000	42919000	47317000	70627000	34654000	40334000	49352000	36126000	48112000	38322000	45596000	34187000	44898000	37327000	7400100	55179000	53898000	2.72245e-06	3.34527e-06	4.80845e-06	3.06142e-06	3.21822e-06	2.78703e-06	4.8954e-06	2.52977e-06	2.42226e-06	3.51002e-06	2.40473e-06	2.93709e-06	2.48399e-06	3.09526e-06	2.47185e-06	3.44043e-06	2.69692e-06	6.52708e-07	4.42082e-06	4.0077e-06	0.0619866	0.0761675	0.109482	0.0697045	0.0732746	0.0634569	0.111462	0.0575995	0.0551515
Q8WUA8	65950000	59081000	68231000	47392000	18070000	70860000	46499000	23952000	78618000	15921000	76721000	92616000	75879000	53573000	40871000	26011000	71296000	20078000	22008000	38807000	4.042e-06	3.66513e-06	4.51671e-06	3.33825e-06	1.35495e-06	4.17374e-06	3.22301e-06	1.74851e-06	4.7214e-06	1.13234e-06	5.10695e-06	5.65391e-06	4.9184e-06	3.63677e-06	2.95513e-06	1.99317e-06	5.15121e-06	1.77093e-06	1.76323e-06	2.88558e-06	0.106911	0.0969432	0.119468	0.0882971	0.0358387	0.110396	0.0852489	0.0462484	0.124882
Q8TDL5	45901000	56474000	52573000	45715000	33657000	25918000	18972000	22391000	0	0	47056000	42163000	0	0	40210000	12962000	14535000	17962000	0	36294000	2.81322e-06	3.5034e-06	3.4802e-06	3.22012e-06	2.52372e-06	1.5266e-06	1.31501e-06	1.63456e-06	0	0	3.13229e-06	2.57392e-06	0	0	2.90733e-06	9.93249e-07	1.05017e-06	1.58429e-06	0	2.69872e-06	0.0536454	0.0668066	0.066364	0.0614047	0.048125	0.0291108	0.0250761	0.0311695	0
Q15485	171160000	185820000	200690000	146370000	149240000	364600000	210060000	340130000	316700000	446410000	0	0	0	0	16105000	92892000	72276000	116680000	97474000	91040000	1.04902e-05	1.15275e-05	1.32852e-05	1.03102e-05	1.11906e-05	2.14754e-05	1.456e-05	2.48298e-05	1.90194e-05	3.17497e-05	0	0	0	0	1.16445e-06	7.11811e-06	5.22202e-06	1.02915e-05	7.80941e-06	6.76948e-06	0.308526	0.339033	0.390728	0.303231	0.329124	0.63161	0.428222	0.730266	0.559377
Q86WD7	709010000	815020000	869960000	9681900000	5799100000	0	8758000000	4160600000	9034200000	9217200000	4646200000	4733700000	5603800000	4608000000	5724900000	4421000000	6085500000	5683700000	8113300000	8924000000	4.34544e-05	5.05603e-05	5.75891e-05	0.000681984	0.000434838	0	0.000607047	0.000303727	0.000542548	0.000655548	0.000309275	0.000288977	0.000363233	0.000312811	0.000413932	0.000338771	0.000439684	0.000501317	0.00065002	0.000663564	0.933379	1.08601	1.23699	14.6487	9.3401	0	13.0391	6.52391	11.6537
P13598	108190000	113840000	120940000	158430000	143850000	161310000	104840000	72520000	176050000	68138000	75993000	80787000	87698000	90951000	74815000	155750000	135680000	25294000	90279000	157580000	6.63084e-06	7.06214e-06	8.00591e-06	1.11597e-05	1.07864e-05	9.50135e-06	7.26682e-06	5.29402e-06	1.05727e-05	4.84612e-06	5.05849e-06	4.93179e-06	5.6845e-06	6.17415e-06	5.4094e-06	1.19348e-05	9.80303e-06	2.23099e-06	7.23296e-06	1.17172e-05	0.216312	0.230382	0.26117	0.364052	0.351876	0.309955	0.23706	0.172702	0.344903
O75015	374040000	538970000	436050000	389910000	478960000	240880000	159010000	40359000	298250000	52015000	75728000	78376000	94300000	57225000	65230000	148240000	152020000	62051000	67937000	151760000	2.29245e-05	3.34354e-05	2.88654e-05	2.74649e-05	3.59142e-05	1.41881e-05	1.10215e-05	2.94624e-06	1.79114e-05	3.69942e-06	5.04085e-06	4.78461e-06	6.11243e-06	3.88468e-06	4.71637e-06	1.13593e-05	1.09836e-05	5.47306e-06	5.44297e-06	1.12844e-05	0.874446	1.27538	1.10106	1.04764	1.36993	0.541201	0.420412	0.112383	0.683223
P40189	25312000	0	4659100	7771000	23991000	10684000	12172000	5826000	0	6183600	25061000	6605200	6223200	24884000	24793000	21117000	5098200	10358000	4191400	40268000	1.55134e-06	0	3.0842e-07	5.47382e-07	1.79893e-06	6.293e-07	8.43683e-07	4.25303e-07	0	4.39791e-07	1.66819e-06	4.03227e-07	4.03382e-07	1.68923e-06	1.79263e-06	1.61815e-06	3.68351e-07	9.13602e-07	3.35806e-07	2.99422e-06	0.014983	0	0.00297875	0.00528667	0.0173743	0.00607785	0.00814838	0.00410762	0
P15514	21333000	4822100	14689000	13633000	9149700	22714000	17347000	8795500	23303000	8937300	27442000	32508000	9477900	9374400	17039000	113360000	17292000	76995000	80872000	122890000	1.30747e-06	2.99142e-07	9.72373e-07	9.60296e-07	6.86078e-07	1.33788e-06	1.20238e-06	6.42078e-07	1.39946e-06	6.3564e-07	1.82668e-06	1.98451e-06	6.14348e-07	6.36375e-07	1.23198e-06	8.68653e-06	1.24937e-06	6.79115e-06	6.47929e-06	9.13776e-06	0.0468713	0.0107239	0.0348583	0.0344254	0.024595	0.0479613	0.0431038	0.0230177	0.0501688
P09228	22250000	0	40362000	20486000	13993000	26144000	31971000	24035000	33408000	13969000	0	38494000	5498100	19927000	0	20165000	23604000	9522300	9172500	40803000	1.36368e-06	0	2.67186e-06	1.44302e-06	1.04925e-06	1.53991e-06	2.21602e-06	1.75457e-06	2.00631e-06	9.93506e-07	0	2.34994e-06	3.56381e-07	1.35273e-06	0	1.5452e-06	1.70542e-06	8.39891e-07	7.34881e-07	3.034e-06	0.0829235	0	0.162472	0.087748	0.0638033	0.0936402	0.134753	0.106693	0.122002
P14543	11752000	25312000	24280000	0	15387000	63656000	45830000	74267000	61515000	55245000	68385000	80891000	25033000	29309000	0	10909000	9503200	0	10481000	0	7.20267e-07	1.57025e-06	1.60727e-06	0	1.15377e-06	3.74941e-06	3.17664e-06	5.42155e-06	3.69428e-06	3.92915e-06	4.55206e-06	4.93814e-06	1.62261e-06	1.98962e-06	0	8.35933e-07	6.86617e-07	0	8.39716e-07	0	0.00528132	0.0115138	0.0117853	0	0.00845999	0.0274924	0.0232925	0.0397533	0.0270881
P31944	516480000	569370000	584890000	609800000	0	226830000	206150000	0	153070000	170250000	542750000	462600000	510150000	551670000	531260000	404080000	951190000	492410000	816240000	336900000	3.16545e-05	3.53213e-05	3.87182e-05	4.29538e-05	0	1.33606e-05	1.4289e-05	0	9.19261e-06	1.21086e-05	3.61283e-05	2.82403e-05	3.30674e-05	3.74498e-05	3.84121e-05	3.09638e-05	6.87245e-05	4.34318e-05	6.53954e-05	2.50509e-05	1.14363	1.2761	1.39883	1.55185	0	0.482696	0.516239	0	0.332115
P01040	33018000	9496600	16315000	0	0	3499700	16019000	26872000	6791800	8347000	10911000	5412800	8847700	18432000	5565300	92916000	0	22290000	0	45086000	2.02364e-06	5.89128e-07	1.08001e-06	0	0	2.06136e-07	1.11033e-06	1.96168e-06	4.07881e-07	5.93657e-07	7.26293e-07	3.30434e-07	5.73499e-07	1.25124e-06	4.02392e-07	7.11995e-06	0	1.96603e-06	0	3.35247e-06	0.183867	0.0535279	0.0981292	0	0	0.0187295	0.100884	0.178237	0.0370599
Q16378	3982700	6277700	6246400	1254200	1705400	0	557870	0	0	446430	5319300	801790	1107800	1070900	914970	745620	0	633500	0	17867000	2.44095e-07	3.89441e-07	4.13495e-07	8.83447e-08	1.27877e-07	0	3.86679e-08	0	0	3.17511e-08	3.5408e-07	4.89467e-08	7.18065e-08	7.26974e-08	6.61557e-08	5.71352e-08	0	5.58763e-08	0	1.32854e-06	0.0161684	0.0257959	0.0273892	0.00585181	0.00847036	0	0.0025613	0	0
P16070	334530000	251320000	199000000	256690000	290840000	375970000	453020000	425250000	583890000	365230000	655280000	597380000	498590000	439820000	491600000	322270000	368190000	352450000	314440000	453160000	2.0503e-05	1.55908e-05	1.31733e-05	1.8081e-05	2.18082e-05	2.21451e-05	3.14004e-05	3.10436e-05	3.50655e-05	2.5976e-05	4.36188e-05	3.64682e-05	3.23181e-05	2.98569e-05	3.55445e-05	2.46948e-05	2.66021e-05	3.1087e-05	2.51923e-05	3.36957e-05	0.251456	0.191211	0.161562	0.221752	0.267464	0.271595	0.385106	0.38073	0.430056
Q9BUN1	121420000	98216000	93405000	92945000	105510000	201950000	79576000	111500000	102320000	119700000	162210000	164590000	136200000	132250000	186010000	92426000	68841000	94552000	74581000	119990000	7.44169e-06	6.0929e-06	6.18317e-06	6.54696e-06	7.91152e-06	1.18951e-05	5.51569e-06	8.13959e-06	6.14482e-06	8.51333e-06	1.07975e-05	1.00477e-05	8.82835e-06	8.97771e-06	1.34492e-05	7.0824e-06	4.97384e-06	8.33973e-06	5.97527e-06	8.92212e-06	0.20239	0.165707	0.168163	0.178057	0.215168	0.323509	0.150009	0.221371	0.16712
Q9UJJ9	16001000	0	0	0	0	29260000	27038000	0	37991000	15930000	31555000	45175000	70174000	50193000	16823000	19216000	17313000	21821000	20421000	20345000	9.80683e-07	0	0	0	0	1.72345e-06	1.8741e-06	0	2.28155e-06	1.13298e-06	2.10046e-06	2.75779e-06	4.54861e-06	3.40732e-06	1.21637e-06	1.47248e-06	1.25088e-06	1.92467e-06	1.63609e-06	1.5128e-06	0.0288665	0	0	0	0	0.0507299	0.0551643	0	0.0671576
Q9Y4L1	531760000	583700000	558680000	380520000	426150000	852260000	422980000	417540000	709540000	31768000	112900000	84532000	38053000	385910000	119910000	73540000	69372000	51153000	70413000	363880000	3.2591e-05	3.62102e-05	3.69832e-05	2.68035e-05	3.19543e-05	5.01991e-05	2.93182e-05	3.04808e-05	4.26114e-05	2.25941e-06	7.51521e-06	5.16041e-06	2.46656e-06	2.61973e-05	8.66994e-06	5.63521e-06	5.0122e-06	4.51182e-06	5.64134e-06	2.70571e-05	0.292742	0.325251	0.332194	0.240757	0.287023	0.450904	0.263345	0.273787	0.382748
Q6Q788	21522000	27128000	24255000	6893300	13208000	143190000	92761000	93583000	104100000	108820000	20731000	28197000	21879000	23994000	11210000	8909600	5596100	10239000	3184200	5677100	1.31906e-06	1.6829e-06	1.60562e-06	4.85558e-07	9.90384e-07	8.43406e-06	6.42959e-06	6.83163e-06	6.25172e-06	7.73952e-06	1.37996e-06	1.72134e-06	1.41818e-06	1.62882e-06	8.10525e-07	6.82723e-07	4.04324e-07	9.03106e-07	2.55111e-07	4.22133e-07	0.0320067	0.0408353	0.03896	0.011782	0.0240314	0.204651	0.156012	0.165768	0.151697
Q16706	26495000	34677000	39295000	0	8279600	45308000	10460000	11000000	38845000	0	31670000	55389000	19562000	21171000	28610000	0	9117800	0	0	25604000	1.62385e-06	2.15121e-06	2.60123e-06	0	6.20834e-07	2.66869e-06	7.25019e-07	8.03009e-07	2.33283e-06	0	2.10812e-06	3.38132e-06	1.26799e-06	1.43718e-06	2.06861e-06	0	6.58771e-07	0	0	1.90384e-06	0.0123826	0.0164039	0.0198355	0	0.00473413	0.02035	0.00552859	0.00612329	0.0177889
P55290	156680000	95536000	73633000	61337000	68874000	77346000	0	44183000	95081000	52647000	0	126170000	6472900	61120000	0	57320000	57291000	37078000	2604000	53128000	9.60274e-06	5.92664e-06	4.87431e-06	4.32052e-06	5.16442e-06	4.55577e-06	0	3.22539e-06	5.71008e-06	3.74437e-06	0	7.70228e-06	4.19567e-07	4.14909e-06	0	4.3923e-06	4.13934e-06	3.27037e-06	2.08627e-07	3.95045e-06	0.122662	0.075705	0.0622629	0.055189	0.0659687	0.0581939	0	0.0412001	0.0729387
P12830	68652000	14673000	13966000	77873000	67233000	13470000	59750000	52541000	12749000	65556000	95368000	18180000	39451000	66525000	72608000	32199000	48284000	41794000	48999000	60812000	4.2076e-06	9.1025e-07	9.24513e-07	5.4853e-06	5.04137e-06	7.93399e-07	4.14148e-06	3.83553e-06	7.6564e-07	4.66249e-06	6.34819e-06	1.10983e-06	2.55718e-06	4.51601e-06	5.24983e-06	2.46734e-06	3.48857e-06	3.68634e-06	3.9257e-06	4.52181e-06	0.0431748	0.0093402	0.00948656	0.0562855	0.0517303	0.00814118	0.0424963	0.039357	0.00785635
A0A0B4J1V6	248560000	233860000	138660000	214480000	155070000	205610000	110900000	0	208960000	42608000	113940000	276040000	283410000	180020000	180340000	34822000	155010000	36631000	25687000	91896000	1.5234e-05	1.45077e-05	9.17893e-06	1.51078e-05	1.16277e-05	1.21107e-05	7.68686e-06	0	1.25491e-05	3.03037e-06	7.58444e-06	1.68514e-05	1.83704e-05	1.22205e-05	1.30393e-05	2.66833e-06	1.11996e-05	3.23095e-06	2.05799e-06	6.83313e-06	1.18478	1.1283	0.713869	1.17497	0.904317	0.941878	0.597827	0	0.975974
A0A0C4DH24	21033000	306130000	19689000	21548000	24260000	537160000	0	0	401640000	9310100	202090000	220380000	27184000	47778000	25517000	663820000	605810000	615350000	521130000	863300000	1.28909e-06	1.8991e-05	1.30336e-06	1.51782e-06	1.8191e-06	3.16394e-05	0	0	2.41205e-05	6.62155e-07	1.34522e-05	1.34535e-05	1.76204e-06	3.24338e-06	1.84497e-06	5.08671e-05	4.37704e-05	5.42754e-05	4.17518e-05	6.41926e-05	0.103708	1.52783	0.104856	0.12211	0.146348	2.5454	0	0	1.9405
A0A075B6S2	610570000	519120000	252530000	149890000	154390000	328240000	210590000	96972000	253160000	117970000	298260000	379350000	289840000	230090000	266660000	7016200000	257870000	7297500000	263270000	299960000	3.74211e-05	3.2204e-05	1.67168e-05	1.05581e-05	1.15767e-05	1.93337e-05	1.45967e-05	7.07903e-06	1.52035e-05	8.39029e-06	1.98537e-05	2.31581e-05	1.87871e-05	1.56195e-05	1.92805e-05	0.000537636	1.86314e-05	0.000643658	2.10926e-05	2.23042e-05	2.84723	2.45028	1.27192	0.803326	0.880828	1.47103	1.11061	0.538616	1.15678
A0A0B4J1V2	532500000	625120000	299760000	500760000	624640000	804610000	336850000	323800000	747060000	299920000	792230000	889160000	414040000	375370000	404940000	785410000	708520000	789380000	678830000	898280000	3.26363e-05	3.87798e-05	1.98433e-05	3.52731e-05	4.68378e-05	4.73925e-05	2.33482e-05	2.36377e-05	4.48646e-05	2.1331e-05	5.27349e-05	5.42804e-05	2.68377e-05	2.54818e-05	2.92787e-05	6.01842e-05	5.11914e-05	6.96253e-05	5.43864e-05	6.67936e-05	2.47582	2.94187	1.50534	2.67585	3.55316	3.59524	1.77122	1.79318	3.40348
P08637	12730000	17585000	11888000	0	47456000	0	13368000	18203000	13171000	31278000	7737700	0	14245000	21338000	22580000	24347000	74277000	64234000	50687000	92103000	7.80207e-07	1.0909e-06	7.86955e-07	0	3.55842e-06	0	9.26582e-07	1.32883e-06	7.90983e-07	2.22456e-06	5.15061e-07	0	9.23347e-07	1.44852e-06	1.63262e-06	1.86566e-06	5.3666e-06	5.6656e-06	4.06094e-06	6.84852e-06	0.0268214	0.0375021	0.0270533	0	0.122329	0	0.0318534	0.0456816	0.0271918
P01762	5491500000	4963200000	4683800000	3632500000	3289200000	4041200000	3137200000	2548700000	4123000000	3266700000	2633600000	3574600000	3521100000	3432500000	2419700000	3579200000	4793800000	3647100000	2817500000	4527400000	0.000336568	0.000307896	0.000310055	0.00025587	0.000246636	0.000238031	0.00021745	0.000186057	0.000247606	0.000232335	0.000175306	0.000218218	0.000228234	0.000233013	0.000174953	0.000274266	0.000346357	0.000321683	0.000225732	0.000336645	26.0038	23.7886	23.9554	19.769	19.0556	18.3907	16.8006	14.3751	19.1305
P23470	21339000	28013000	18921000	19938000	23912000	0	24092000	17854000	0	12695000	20265000	19958000	28037000	24725000	26062000	19441000	15405000	21699000	18549000	18806000	1.30784e-06	1.73781e-06	1.25252e-06	1.40441e-06	1.79301e-06	0	1.6699e-06	1.30336e-06	0	9.02896e-07	1.34894e-06	1.21837e-06	1.81733e-06	1.67844e-06	1.88438e-06	1.48972e-06	1.11303e-06	1.91391e-06	1.48611e-06	1.39836e-06	0.0080731	0.0107272	0.00773161	0.00866923	0.011068	0	0.010308	0.00804541	0
Q8N474	0	29973000	98725000	51413000	87683000	31336000	54405000	0	26677000	0	201350000	175700000	21732000	112430000	47527000	28770000	80741000	14032000	44083000	21946000	0	1.8594e-06	6.53534e-06	3.62148e-06	6.57479e-06	1.84573e-06	3.771e-06	0	1.60209e-06	0	1.34029e-05	1.07259e-05	1.40865e-06	7.63224e-06	3.43638e-06	2.20458e-06	5.83363e-06	1.23766e-06	3.53184e-06	1.63184e-06	0	0.0525476	0.184692	0.102345	0.185807	0.0521613	0.106571	0	0.0452758
P02452	0	0	0	80249000	14368000	0	9873800	9257100	19257000	30987000	43638000	34388000	40238000	49893000	39786000	45754000	0	6871000	52362000	41202000	0	0	0	5.65267e-06	1.07736e-06	0	6.84387e-07	6.75776e-07	1.15648e-06	2.20386e-06	2.90477e-06	2.09928e-06	2.60819e-06	3.38696e-06	2.87668e-06	3.50603e-06	0	6.0604e-07	4.19513e-06	3.06367e-06	0	0	0	0.0406842	0.00775417	0	0.00492577	0.00486379	0.00832358
Q02985	7306700	12061000	44924000	0	0	3884900	0	40917000	106360000	44479000	5005400	4504500	4974800	4472700	0	3785900	3942700	8053900	14252000	3887300	4.47819e-07	7.48212e-07	2.97385e-06	0	0	2.28825e-07	0	2.98697e-06	6.38744e-06	3.16344e-06	3.33185e-07	2.74985e-07	3.22462e-07	3.03626e-07	0	2.90105e-07	2.84864e-07	7.10374e-07	1.14184e-06	2.89049e-07	0.0119985	0.020047	0.0796788	0	0	0.00613094	0	0.0800304	0.17114
P01705	1741200000	1159500000	1804000000	1557400000	1044800000	1719300000	1847600000	789530000	2410500000	770640000	1254500000	1297900000	1811700000	1088100000	666540000	1147900000	2091200000	1167100000	1308300000	1714400000	0.000106716	7.19304e-05	0.00011942	0.000109702	7.83429e-05	0.000101269	0.000128064	5.76363e-05	0.000144762	5.48096e-05	8.3506e-05	7.92327e-05	0.000117433	7.3865e-05	4.81933e-05	8.7961e-05	0.000151092	0.000102941	0.000104818	0.000127478	8.97302	6.04813	10.0412	9.22407	6.58731	8.51499	10.768	4.84624	12.1721
A0A0A0MT36	423390000	609410000	318350000	450160000	387800000	239050000	169540000	160640000	216630000	147500000	584500000	370240000	460850000	369100000	435620000	215930000	132960000	171930000	118710000	197190000	2.59491e-05	3.78052e-05	2.10739e-05	3.17089e-05	2.90787e-05	1.40803e-05	1.17514e-05	1.17268e-05	1.30097e-05	1.04905e-05	3.89074e-05	2.2602e-05	2.98718e-05	2.50561e-05	3.14969e-05	1.65462e-05	9.60651e-06	1.51647e-05	9.51079e-06	1.46625e-05	2.10284	3.06363	1.70777	2.5696	2.35645	1.14103	0.952302	0.950312	1.05427
P49913	57876000	80728000	116810000	62106000	84322000	0	47438000	135840000	59457000	183150000	32685000	53350000	32233000	25482000	19401000	56622000	29308000	28996000	33007000	38221000	3.54715e-06	5.00802e-06	7.73252e-06	4.37469e-06	6.32277e-06	0	3.28809e-06	9.91643e-06	3.57069e-06	1.3026e-05	2.17568e-06	3.25685e-06	2.08931e-06	1.72983e-06	1.40276e-06	4.33882e-06	2.11754e-06	2.55752e-06	2.64445e-06	2.84201e-06	0.183781	0.259469	0.400628	0.226656	0.327588	0	0.170359	0.513778	0.185
A0M8Q6	798010000	586310000	396050000	558950000	279820000	1676000000	1455600000	379990000	1712700000	927000000	600840000	550580000	743560000	677370000	363840000	116530000	150860000	46367000	265400000	414060000	4.89091e-05	3.63721e-05	2.62175e-05	3.93719e-05	2.09819e-05	9.87184e-05	0.000100893	2.77396e-05	0.000102856	6.59303e-05	3.9995e-05	3.36112e-05	4.81968e-05	4.59828e-05	2.6307e-05	8.92944e-06	1.08998e-05	4.08969e-06	2.12633e-05	3.07883e-05	4.34632	3.23222	2.32982	3.49879	1.86456	8.77263	8.96585	2.46508	9.14032
A0A0C4DH29	271830000	273750000	294210000	220210000	161700000	351580000	326020000	282440000	361890000	267980000	275240000	351840000	315030000	231460000	302380000	372100000	377900000	271880000	326510000	406140000	1.66601e-05	1.69823e-05	1.94759e-05	1.55114e-05	1.21249e-05	2.07085e-05	2.25976e-05	2.06183e-05	2.17333e-05	1.90593e-05	1.83214e-05	2.14787e-05	2.04199e-05	1.57125e-05	2.18632e-05	2.85132e-05	2.73037e-05	2.39805e-05	2.61593e-05	3.01994e-05	1.28076	1.30553	1.49723	1.19245	0.932107	1.59198	1.73721	1.58505	1.67076
A0A087WSX0	663650000	578730000	816610000	623610000	703660000	1064200000	721150000	547970000	735220000	820280000	409690000	522450000	356280000	461350000	229760000	622610000	801730000	336190000	648520000	780810000	4.06743e-05	3.59019e-05	5.40575e-05	4.39265e-05	5.2763e-05	6.26826e-05	4.99854e-05	4.00022e-05	4.41536e-05	5.83401e-05	2.72711e-05	3.18939e-05	2.30937e-05	3.13185e-05	1.66125e-05	4.77092e-05	5.79259e-05	2.96528e-05	5.19581e-05	5.80589e-05	3.09029	2.72769	4.10708	3.33737	4.00874	4.76239	3.79771	3.03922	3.35463
P21741	147950000	35512000	64112000	133700000	128130000	72151000	43213000	43163000	66117000	84884000	211840000	196820000	102520000	156050000	166020000	112190000	52796000	89076000	138350000	49328000	9.06768e-06	2.20301e-06	4.24405e-06	9.41771e-06	9.60765e-06	4.24978e-06	2.99524e-06	3.15093e-06	3.97065e-06	6.03714e-06	1.41012e-05	1.20152e-05	6.64525e-06	1.05934e-05	1.20039e-05	8.59687e-06	3.81457e-06	7.85673e-06	1.10843e-05	3.66789e-06	0.581821	0.141355	0.272316	0.60428	0.616468	0.272684	0.192187	0.202177	0.254774
P01766	327650000	313310000	335680000	277760000	229300000	253100000	68335000	143320000	218440000	72557000	300730000	292440000	339860000	253430000	185730000	206100000	207300000	166730000	146430000	162920000	2.00813e-05	1.94364e-05	2.22211e-05	1.95652e-05	1.71937e-05	1.49079e-05	4.73653e-06	1.04625e-05	1.31184e-05	5.16041e-06	2.00181e-05	1.78525e-05	2.20294e-05	1.72039e-05	1.3429e-05	1.5793e-05	1.49777e-05	1.4706e-05	1.17317e-05	1.21143e-05	1.60573	1.55417	1.77684	1.56446	1.37484	1.19206	0.378741	0.836596	1.04897
A0A075B6S5	131300000	134430000	139630000	168820000	71301000	55395000	110620000	30632000	58452000	56257000	7849000	83687000	36615000	32204000	68853000	65473000	35085000	59219000	99951000	81423000	8.04723e-06	8.33946e-06	9.24314e-06	1.18915e-05	5.34641e-06	3.26283e-06	7.66745e-06	2.23616e-06	3.51033e-06	4.00112e-06	5.2247e-07	5.10883e-06	2.37335e-06	2.18615e-06	4.97833e-06	5.01705e-06	2.53493e-06	5.22327e-06	8.00786e-06	6.05439e-06	0.633091	0.656082	0.727177	0.93553	0.420613	0.256693	0.603214	0.175923	0.276165
P04430	1132800000	1172500000	1036200000	519710000	469550000	192780000	72396000	43356000	164910000	60784000	77500000	94183000	115580000	84853000	51501000	92540000	301080000	60332000	81454000	112740000	6.9428e-05	7.27368e-05	6.85937e-05	3.66079e-05	3.52086e-05	1.1355e-05	5.01802e-06	3.16502e-06	9.90366e-06	4.32309e-06	5.1588e-06	5.74957e-06	7.49178e-06	5.76019e-06	3.72371e-06	7.09114e-06	2.17534e-05	5.32144e-06	6.52592e-06	8.38303e-06	5.5023	5.76453	5.43618	2.90124	2.79034	0.899902	0.397687	0.250834	0.784883
A0A0B4J2H0	35866000	151540000	93352000	82663000	0	126330000	40295000	57064000	49743000	62169000	19869000	15227000	0	0	0	108590000	84899000	82483000	93161000	91303000	2.19819e-06	9.40089e-06	6.17966e-06	5.82271e-06	0	7.44099e-06	2.79299e-06	4.16572e-06	2.98731e-06	4.4216e-06	1.32258e-06	9.2956e-07	0	0	0	8.32101e-06	6.13405e-06	7.27521e-06	7.46386e-06	6.78904e-06	0.173632	0.742566	0.488125	0.459929	0	0.587756	0.220615	0.329046	0.235965
Q9UNN8	64612000	63116000	52927000	46794000	42421000	148970000	204540000	124200000	81820000	111960000	48205000	0	0	110720000	0	56598000	34815000	33836000	35785000	64018000	3.95999e-06	3.91544e-06	3.50363e-06	3.29613e-06	3.18088e-06	8.77451e-06	1.41774e-05	9.0667e-06	4.91369e-06	7.96284e-06	3.20877e-06	0	0	7.51616e-06	0	4.33698e-06	2.51542e-06	2.98442e-06	2.86702e-06	4.7602e-06	0.148476	0.146805	0.131365	0.123585	0.119264	0.328991	0.531565	0.339946	0.184234
P43121	14400000	36561000	32198000	17130000	15700000	73326000	19189000	13887000	62593000	17133000	73247000	23765000	19936000	14736000	48359000	16330000	11076000	16091000	9189800	14453000	8.82559e-07	2.26809e-06	2.13142e-06	1.20662e-06	1.17724e-06	4.31899e-06	1.33006e-06	1.01376e-06	3.75902e-06	1.21854e-06	4.8757e-06	1.45078e-06	1.29223e-06	1.00034e-06	3.49654e-06	1.25133e-06	8.00253e-07	1.41927e-06	7.36267e-07	1.07468e-06	0.012325	0.0316741	0.0297656	0.0168506	0.0164403	0.0603152	0.0185744	0.0141573	0.0524951
A0A0C4DH31	632560000	1008600000	933340000	774210000	564450000	784490000	540120000	488370000	647510000	437930000	741220000	949020000	805530000	718580000	684610000	1104500000	978030000	710630000	885970000	1138000000	3.87689e-05	6.25692e-05	6.17847e-05	5.45346e-05	4.23245e-05	4.62074e-05	3.74376e-05	3.56514e-05	3.88862e-05	3.11465e-05	4.93394e-05	5.79347e-05	5.22137e-05	4.87804e-05	4.94998e-05	8.46354e-05	7.06637e-05	6.26794e-05	7.0982e-05	8.46185e-05	3.02409	4.88059	4.8194	4.25387	3.30144	3.60432	2.92025	2.78092	3.03324
A0A075B6H9	152790000	184940000	245300000	165350000	149980000	352430000	350370000	271440000	99679000	211090000	158480000	56233000	30857000	82802000	0	157890000	131070000	127910000	194950000	133410000	9.36432e-06	1.14729e-05	1.62382e-05	1.16471e-05	1.1246e-05	2.07585e-05	2.42854e-05	1.98153e-05	5.98621e-06	1.50132e-05	1.05493e-05	3.43285e-06	2.00012e-06	5.62096e-06	0	1.20988e-05	9.46995e-06	1.1282e-05	1.5619e-05	9.92e-06	0.733134	0.898213	1.27129	0.911853	0.880454	1.62519	1.9013	1.55135	0.468662
P01619	34528000000	36764000000	42881000000	28426000000	26289000000	29349000000	26368000000	27060000000	30657000000	26000000000	33200000000	33156000000	29577000000	30141000000	24912000000	38339000000	36530000000	30031000000	35757000000	30586000000	0.00211618	0.00228068	0.00283861	0.0020023	0.00197124	0.00172869	0.00182766	0.0019754	0.0018411	0.00184918	0.00220996	0.00202407	0.00191715	0.0020461	0.00180123	0.00293783	0.00263933	0.00264881	0.00286478	0.00227429	168.526	181.626	226.058	159.457	156.984	137.667	145.549	157.315	146.62
P01624	9925300000	9940200000	9752100000	8249300000	7044200000	10123000000	9577700000	4643600000	10686000000	8514600000	8020700000	8653000000	8679000000	8359700000	8650200000	7265500000	6715000000	8446600000	7314200000	7778800000	0.00060831	0.000616647	0.000645564	0.000581073	0.0005282	0.000596257	0.000663863	0.000338986	0.000641747	0.000605577	0.000533899	0.000528238	0.000562564	0.000567493	0.000625442	0.000556739	0.000485166	0.000745012	0.000585998	0.00057841	48.6804	49.3476	51.6616	46.5007	42.2695	47.7158	53.1261	27.1276	51.3562
P06310	15691000000	19636000000	20200000000	21693000000	19790000000	15113000000	21085000000	9421600000	19181000000	14030000000	16040000000	17580000000	14924000000	16099000000	13338000000	19612000000	22804000000	17373000000	16901000000	17241000000	0.000961683	0.00121813	0.00133719	0.00152804	0.00148393	0.000890174	0.00146147	0.000687784	0.00115191	0.000997844	0.00106771	0.0010732	0.000967359	0.00109287	0.000964387	0.00150282	0.00164761	0.00153234	0.00135407	0.00128199	72.9377	92.3878	101.417	115.892	112.547	67.5141	110.844	52.1641	87.3654
P06331	10916000000	20487000000	16197000000	9428400000	10545000000	6922400000	8677400000	6756000000	14684000000	7968100000	5554000000	11730000000	12960000000	9409000000	7145200000	7547600000	11297000000	6663800000	10200000000	8563400000	0.000669029	0.00127093	0.0010722	0.000664128	0.000790702	0.000407738	0.000601461	0.000493193	0.000881846	0.000566709	0.000369703	0.000716079	0.000840054	0.000638724	0.000516625	0.000578356	0.000816221	0.000587764	0.000817202	0.000636751	48.4277	91.996	77.6112	48.073	57.2351	29.5141	43.5368	35.6998	63.8325
P0DP03	5414200000	7689900000	4784100000	5013300000	5318400000	6881300000	6602900000	5832700000	12419000000	6280400000	6221300000	6574800000	5090200000	5035000000	3974500000	6453900000	9608100000	4677600000	4289800000	6267300000	0.00033183	0.000477048	0.000316695	0.000353132	0.000398793	0.000405317	0.00045767	0.000425792	0.000745822	0.000446676	0.000414122	0.000401371	0.000329942	0.000341798	0.000287371	0.000494548	0.000694196	0.000412576	0.00034369	0.000466019	25.6299	36.8462	24.4609	27.2752	30.802	31.3058	35.3495	32.8873	57.6058
Q03591	3743700000	4877100000	4060700000	4075300000	3800800000	7929700000	6885000000	6626000000	5666100000	5468900000	3029400000	3461300000	3236900000	3330600000	3544500000	6311000000	5018100000	6485700000	5394200000	6383500000	0.000229447	0.000302554	0.000268808	0.00028706	0.000284998	0.000467069	0.000477223	0.000483703	0.000340277	0.00038896	0.000201653	0.000211301	0.000209813	0.000226096	0.000256281	0.000483598	0.000362563	0.000572055	0.000432172	0.000474659	6.09421	8.03597	7.13965	7.62445	7.56966	12.4055	12.6752	12.8474	9.03791
O15078	62052000	9914400	78188000	152190000	64287000	210920000	63967000	0	7424900000	6409000000	140230000	131700000	62754000	141020000	0	57051000	131070000	73775000	80819000	8949900000	3.8031e-06	6.15047e-07	5.17584e-06	1.07201e-05	4.82047e-06	1.24234e-05	4.43377e-06	0	0.000445902	0.000455822	9.33444e-06	8.03987e-06	4.06765e-06	9.57306e-06	0	4.37169e-06	9.46995e-06	6.50714e-06	6.47505e-06	0.00066549	0.013097	0.00211808	0.0178244	0.0369176	0.0166006	0.0427834	0.0152689	0	1.53558
P21333	114140000	60010000	78013000	152720000	125820000	49973000	0	27409000	50557000	52158000	109400000	76389000	68589000	0	43107000	133440000	116370000	0	63241000	105430000	6.99551e-06	3.72276e-06	5.16426e-06	1.07575e-05	9.43444e-06	2.94347e-06	0	2.00088e-06	3.0362e-06	3.70959e-06	7.28223e-06	4.66331e-06	4.44587e-06	0	3.1168e-06	1.02252e-05	8.40786e-06	0	5.06674e-06	7.83948e-06	0.0249181	0.0132605	0.0183952	0.0383182	0.0336056	0.0104847	0	0.00712716	0.010815
P15151	53949000	74493000	62491000	0	122710000	65780000	0	80514000	50200000	112320000	6007500	74410000	8324800	64614000	8960400	20278000	7925600	18053000	28713000	71766000	3.30647e-06	4.62122e-06	4.13674e-06	0	9.20124e-06	3.87452e-06	0	5.87759e-06	3.01476e-06	7.98845e-06	3.9989e-07	4.5425e-06	5.39605e-07	4.38628e-06	6.4787e-07	1.55386e-06	5.72633e-07	1.59232e-06	2.30042e-06	5.33632e-06	0.0729873	0.102009	0.0913148	0	0.203109	0.0855265	0	0.129742	0.066548
P61247	99931000	50453000	34924000	49851000	66179000	24127000	26154000	15059000	0	16561000	53107000	81932000	44339000	45650000	39885000	97996000	114990000	0	79518000	141720000	6.12466e-06	3.12989e-06	2.31188e-06	3.51146e-06	4.96234e-06	1.42111e-06	1.81282e-06	1.09932e-06	0	1.17785e-06	3.53508e-06	5.00169e-06	2.87401e-06	3.09892e-06	2.88383e-06	7.50922e-06	8.30815e-06	0	6.37081e-06	1.05379e-05	0.20453	0.104521	0.0772041	0.117264	0.165715	0.0474573	0.0605385	0.0367113	0
P10646	55185000	42390000	37180000	79498000	52808000	45901000	37883000	33593000	75061000	25880000	39099000	62518000	41024000	39735000	53652000	51516000	41355000	37466000	46717000	73069000	3.38222e-06	2.62969e-06	2.46122e-06	5.59977e-06	3.95974e-06	2.70362e-06	2.6258e-06	2.45232e-06	4.50778e-06	1.84064e-06	2.60263e-06	3.81653e-06	2.65914e-06	2.69739e-06	3.87924e-06	3.94756e-06	2.98794e-06	3.3046e-06	3.74287e-06	5.43321e-06	0.0965936	0.0751019	0.0702904	0.159925	0.113087	0.0772133	0.0749908	0.0700361	0.128739
P02788	139180000	92070000	104660000	103500000	84625000	115630000	49942000	56889000	61121000	151510000	30075000	36834000	15853000	10536000	5849300	22160000	15427000	0	0	21820000	8.53018e-06	5.71163e-06	6.92822e-06	7.29045e-06	6.34549e-06	6.81074e-06	3.46165e-06	4.15294e-06	3.67062e-06	1.07757e-05	2.00195e-06	2.2486e-06	1.02758e-06	7.1523e-07	4.22926e-07	1.69807e-06	1.11462e-06	0	0	1.62247e-06	0.109108	0.0730564	0.0886177	0.0932509	0.0811641	0.0871151	0.0442774	0.0531196	0.0469502
P47914	918640000	1181400000	1204600000	654470000	751450000	1184200000	941890000	865650000	1345300000	871010000	1066200000	1210200000	1069000000	833660000	1048500000	823030000	785560000	874820000	753570000	771120000	5.63024e-05	7.3289e-05	7.97414e-05	4.61003e-05	5.63464e-05	6.97508e-05	6.52856e-05	6.31931e-05	8.07919e-05	6.19481e-05	7.09718e-05	7.38789e-05	6.92915e-05	5.65925e-05	7.58104e-05	6.3067e-05	5.67576e-05	7.71613e-05	6.03744e-05	5.73383e-05	3.17161	4.12849	4.49197	2.59691	3.17409	3.92918	3.67765	3.55978	4.55114
P30685	34135000	50358000	52328000	128200000	132060000	86748000	96245000	84115000	57851000	111750000	17737000	46632000	22392000	23995000	103260000	57877000	20324000	53452000	56039000	69771000	2.09209e-06	3.12399e-06	3.46398e-06	9.03029e-06	9.90234e-06	5.10956e-06	6.67107e-06	6.14046e-06	3.47424e-06	7.94791e-06	1.18067e-06	2.84674e-06	1.45143e-06	1.62889e-06	7.46608e-06	4.43499e-06	1.46843e-06	4.7146e-06	4.48973e-06	5.18798e-06	0.0517141	0.0772214	0.0856254	0.223218	0.244774	0.126302	0.164901	0.151785	0.0858791
Q8N6C8	30309000	28809000	26763000	18241000	3869800	114820000	6893800	6172200	75893000	19597000	39936000	71604000	32565000	17816000	10466000	4840200	3572600	4124700	22010000	29928000	1.8576e-06	1.78719e-06	1.77164e-06	1.28488e-06	2.90172e-07	6.76303e-06	4.77833e-07	4.50575e-07	4.55775e-06	1.39378e-06	2.65835e-06	4.3712e-06	2.11083e-06	1.20943e-06	7.56731e-07	3.70894e-07	2.58124e-07	3.63809e-07	1.76339e-06	2.22536e-06	0.0391313	0.037648	0.0373205	0.0270666	0.00611261	0.142467	0.0100658	0.00949159	0.0960112
A0A087WSY4	3602600000	2047500000	2207500000	3514900000	3607100000	1416500000	700110000	683650000	1265600000	655480000	1661000000	1959400000	520500000	1443800000	1363600000	1930000000	2357200000	1601300000	1457300000	1796900000	0.000220799	0.000127018	0.000146131	0.000247586	0.000270473	8.34335e-05	4.8527e-05	4.9907e-05	7.60055e-05	4.66192e-05	0.000110565	0.000119615	3.37383e-05	9.80115e-05	9.85933e-05	0.000147892	0.00017031	0.000141239	0.000116756	0.000133612	16.952	9.75187	11.2193	19.0085	20.7657	6.40564	3.72568	3.83163	5.83536
Q8IUX7	54664000	58482000	75784000	52509000	12039000	57807000	35393000	19556000	31383000	25273000	69332000	69033000	28711000	47875000	31792000	0	0	43926000	0	0	3.35029e-06	3.62797e-06	5.0167e-06	3.69869e-06	9.02728e-07	3.4049e-06	2.45321e-06	1.4276e-06	1.8847e-06	1.79747e-06	4.6151e-06	4.21425e-06	1.86102e-06	3.24996e-06	2.29868e-06	0	0	3.87438e-06	0	0	0.0255884	0.0277092	0.0383159	0.0282493	0.00689474	0.0260055	0.0187368	0.0109036	0.0143947
P81605	177550000	441390000	92882000	253980000	150810000	271370000	378440000	128430000	69597000	125250000	102120000	240660000	92588000	316070000	11513000	112080000	131490000	154890000	144300000	199110000	1.08818e-05	2.73819e-05	6.14855e-06	1.78901e-05	1.13083e-05	1.5984e-05	2.6231e-05	9.37549e-06	4.17964e-06	8.90806e-06	6.79764e-06	1.46915e-05	6.00146e-06	2.14562e-05	8.32433e-07	8.58844e-06	9.5003e-06	1.36617e-05	1.1561e-05	1.48053e-05	0.96436	2.42662	0.544891	1.58544	1.00215	1.41652	2.32462	0.830866	0.370404
P48506	27718000	30023000	31829000	15314000	207060000	44836000	9526100	21985000	20714000	27614000	49091000	233780000	79332000	13656000	0	0	0	0	0	0	1.6988e-06	1.8625e-06	2.107e-06	1.0787e-06	1.55261e-05	2.64089e-06	6.60287e-07	1.60492e-06	1.24398e-06	1.96397e-06	3.26775e-06	1.42715e-05	5.14222e-06	9.27029e-07	0	0	0	0	0	0	0.0233464	0.0255961	0.0289562	0.0148245	0.213373	0.0362935	0.00907424	0.0220562	0.0170958
P09382	0	24798000	0	8460500	143850000	58274000	21156000	59659000	46266000	45950000	7981800	82868000	36947000	5211600	5982000	16578000	6391400	0	11636000	0	0	1.53836e-06	0	5.9595e-07	1.07864e-05	3.43241e-06	1.4664e-06	4.35515e-06	2.7785e-06	3.26807e-06	5.3131e-07	5.05883e-06	2.39487e-06	3.53786e-07	4.32521e-07	1.27034e-06	4.61786e-07	0	9.32252e-07	0	0	0.104537	0	0.0404967	0.732971	0.233243	0.0996463	0.295947	0.188808
A0A0B4J1Z2	20986000000	22193000000	25722000000	21828000000	286760000	21876000000	986450000	79361000	23432000000	19631000000	1339300000	20002000000	17376000000	20069000000	19078000000	1073300000	1150400000	925220000	879230000	529840000	0.00128621	0.00137676	0.00170273	0.00153754	2.15023e-05	0.00128852	6.83743e-05	5.79342e-06	0.00140721	0.0013962	8.91508e-05	0.00122106	0.0011263	0.00136237	0.00137941	8.22446e-05	8.31177e-05	8.16067e-05	7.0442e-05	3.93974e-05	99.0228	105.994	131.09	118.373	1.65542	99.201	5.26401	0.446025	108.338
P55103	119600000	162480000	194020000	133370000	98698000	394920000	199560000	199760000	334370000	161600000	279210000	302690000	220280000	179610000	176310000	119810000	100980000	75274000	81645000	88513000	7.33015e-06	1.00796e-05	1.28436e-05	9.39446e-06	7.40073e-06	2.32613e-05	1.38322e-05	1.45826e-05	2.00806e-05	1.14933e-05	1.85857e-05	1.84783e-05	1.42783e-05	1.21927e-05	1.27479e-05	9.18078e-06	7.29592e-06	6.63936e-06	6.54122e-06	6.58158e-06	0.191703	0.263607	0.335895	0.24569	0.193549	0.608344	0.361749	0.381375	0.525161
P35052	75871000	45138000	50293000	74123000	53119000	89351000	30489000	13290000	49028000	38057000	49227000	75853000	61958000	28325000	82113000	36363000	25485000	17221000	39005000	45105000	4.65005e-06	2.80017e-06	3.32927e-06	5.22116e-06	3.98306e-06	5.26288e-06	2.1133e-06	9.70181e-07	2.94437e-06	2.7067e-06	3.2768e-06	4.63059e-06	4.01606e-06	1.92283e-06	5.93707e-06	2.78642e-06	1.84132e-06	1.51894e-06	3.125e-06	3.35388e-06	0.0753899	0.0453983	0.0539764	0.0846491	0.0645761	0.0853255	0.0342623	0.0157293	0.0477363
P05109	0	79278000	13091000	17863000	112910000	348150000	14274000	50655000	87489000	458920000	20877000	0	0	0	0	46856000	10462000	0	44752000	11535000	0	4.91807e-06	8.6659e-07	1.25825e-06	8.4664e-06	2.05064e-05	9.8938e-07	3.69786e-06	5.25414e-06	3.26394e-05	1.38968e-06	0	0	0	0	3.59047e-06	7.55891e-07	0	3.58544e-06	8.5771e-07	0	0.453947	0.079988	0.116139	0.781466	1.89279	0.0913218	0.341319	0.484968
Q92496	0	0	79119000	11567000	23143000	147990000	104000000	58340000	74879000	109700000	56148000	164030000	115890000	106260000	46377000	80114000	118740000	51702000	62546000	105070000	0	0	5.23747e-06	8.14769e-07	1.73535e-06	8.71679e-06	7.2086e-06	4.25887e-06	4.49685e-06	7.80211e-06	3.7375e-06	1.00135e-05	7.51188e-06	7.21339e-06	3.35323e-06	6.13896e-06	8.5791e-06	4.56025e-06	5.01105e-06	7.81271e-06	0	0	0.0801449	0.0124678	0.0265546	0.133386	0.110308	0.0651701	0.0688118
Q99969	164000000	165680000	148180000	219210000	194560000	220600000	156980000	108720000	278210000	111700000	97547000	158900000	175060000	106620000	190390000	108450000	117180000	121790000	164070000	157540000	1.00514e-05	1.02781e-05	9.80913e-06	1.5441e-05	1.45888e-05	1.29936e-05	1.08808e-05	7.93665e-06	1.67079e-05	7.94435e-06	6.49323e-06	9.70034e-06	1.13472e-05	7.23783e-06	1.37659e-05	8.31028e-06	8.46638e-06	1.07422e-05	1.31449e-05	1.17142e-05	0.539903	0.55208	0.526891	0.829401	0.783629	0.697943	0.584456	0.426312	0.897453
Q6UY14	0	36385000	5547400	4274800	43497000	28730000	6589200	25682000	30419000	44148000	67301000	0	3972900	4560900	4911400	33165000	5785200	0	4923900	37213000	0	2.25717e-06	3.67223e-07	3.01113e-07	3.26156e-06	1.69223e-06	4.5672e-07	1.87481e-06	1.82681e-06	3.1399e-06	4.4799e-06	0	2.57519e-07	3.09614e-07	3.55112e-07	2.54136e-06	4.17987e-07	0	3.94492e-07	2.76705e-06	0	0.0193682	0.00315105	0.00258377	0.0279866	0.0145206	0.003919	0.0160872	0.0156754
P52823	63487000	17594000	33646000	117290000	13325000	53770000	20535000	0	271320000	0	476060000	186470000	98775000	105130000	87641000	19010000	20275000	11958000	27879000	56464000	3.89104e-06	1.09146e-06	2.22728e-06	8.2618e-06	9.99157e-07	3.16712e-06	1.42335e-06	0	1.62941e-05	0	3.1689e-05	1.13834e-05	6.4025e-06	7.13668e-06	6.33677e-06	1.45669e-06	1.46489e-06	1.05473e-06	2.23361e-06	4.19851e-06	0.140873	0.0395154	0.0806371	0.299113	0.0361738	0.114663	0.0515315	0	0.589917
P16152	9315700	11205000	9604800	4341700	111800000	34516000	0	0	9430500	36279000	5999700	62085000	20515000	16092000	0	0	0	42604000	8246200	5924500	5.70948e-07	6.9511e-07	6.35813e-07	3.05825e-07	8.38317e-06	2.03303e-06	0	0	5.66348e-07	2.58024e-06	3.99371e-07	3.79009e-06	1.32976e-06	1.0924e-06	0	0	0	3.75778e-06	6.60668e-07	4.40529e-07	0.0187967	0.0228843	0.0209321	0.0100683	0.275989	0.0669311	0	0	0.0186452
P08294	340530000	291380000	284740000	302000000	71713000	300640000	217540000	189740000	201530000	223870000	346460000	367500000	310680000	279000000	332500000	282610000	241990000	226330000	211290000	300460000	2.08707e-05	1.8076e-05	1.8849e-05	2.12726e-05	5.3773e-06	1.77081e-05	1.50784e-05	1.38512e-05	1.21029e-05	1.59221e-05	2.30622e-05	2.24347e-05	2.0138e-05	1.89397e-05	2.4041e-05	2.16558e-05	1.7484e-05	1.99629e-05	1.69281e-05	2.23414e-05	0.807346	0.699236	0.729142	0.822893	0.208011	0.685004	0.583283	0.535808	0.468178
P02810	58335000	42509000	23175000	31401000	27621000	22138000	28321000	37468000	21888000	35495000	61228000	51327000	34113000	38822000	38879000	16113000	36165000	50919000	30712000	26599000	3.57528e-06	2.63708e-06	1.53412e-06	2.21186e-06	2.07112e-06	1.30395e-06	1.96303e-06	2.73519e-06	1.31448e-06	2.52448e-06	4.07565e-06	3.13335e-06	2.21117e-06	2.63541e-06	2.8111e-06	1.2347e-06	2.61296e-06	4.49118e-06	2.46058e-06	1.97783e-06	0.210113	0.154976	0.0901578	0.129987	0.121716	0.0766311	0.115364	0.160742	0.0772498
P14923	55728000	42513000	59282000	42703000	42545000	103730000	38932000	58437000	102510000	39730000	57223000	39800000	47603000	30517000	36799000	38825000	45167000	46021000	53353000	27449000	3.4155e-06	2.63732e-06	3.92431e-06	3.00796e-06	3.19018e-06	6.10982e-06	2.69851e-06	4.26595e-06	6.15623e-06	2.82568e-06	3.80906e-06	2.42966e-06	3.08558e-06	2.07163e-06	2.6607e-06	2.97507e-06	3.26337e-06	4.05917e-06	4.27453e-06	2.04103e-06	0.0417829	0.0322632	0.0480074	0.0367973	0.0390265	0.0747433	0.0330117	0.0521867	0.0753111
O14786	2284800000	1046100000	2071700000	1822000000	1262700000	1340400000	1292700000	947270000	1610100000	959630000	1315700000	2260700000	1688700000	30777000	1380800000	698430000	57252000	535320000	732270000	871870000	0.000140033	6.48955e-05	0.000137141	0.00012834	9.46818e-05	7.89511e-05	8.96015e-05	6.91515e-05	9.66944e-05	6.8251e-05	8.75798e-05	0.000138009	0.00010946	2.08928e-06	9.9837e-05	5.35191e-05	4.13652e-06	4.72166e-05	5.86679e-05	6.48298e-05	1.35783	0.62926	1.32979	1.24445	0.918082	0.76555	0.868821	0.670527	0.937597
P41222	391030000	328320000	218440000	241250000	136780000	277020000	261610000	143480000	280480000	94782000	272910000	205600000	196140000	280000000	128790000	85884000	178820000	88646000	45093000	110790000	2.39658e-05	2.03676e-05	1.44602e-05	1.69934e-05	1.02563e-05	1.63168e-05	1.81331e-05	1.04742e-05	1.68442e-05	6.7411e-06	1.81663e-05	1.25512e-05	1.27136e-05	1.90076e-05	9.312e-06	6.5811e-06	1.29199e-05	7.8188e-06	3.61276e-06	8.23804e-06	1.13965	0.968546	0.687629	0.808095	0.48772	0.775919	0.86229	0.498081	0.800999
A0A075B6K5	1166900000	1379300000	1335800000	667550000	914240000	602660000	353400000	275580000	442180000	240060000	1321100000	2481200000	1181900000	1030500000	891830000	929660000	1123500000	1129200000	943990000	596340000	7.1518e-05	8.55658e-05	8.84265e-05	4.70216e-05	6.8553e-05	3.54974e-05	2.44954e-05	2.01176e-05	2.65551e-05	1.70736e-05	8.79393e-05	0.000151469	7.66096e-05	6.99549e-05	6.44826e-05	7.12378e-05	8.11741e-05	9.95983e-05	7.56305e-05	4.43422e-05	5.79938	6.93852	7.17049	3.81298	5.55895	2.87848	1.98633	1.63133	2.15335
P03950	114640000	72454000	88956000	24549000	56946000	162680000	54379000	121230000	51379000	102280000	166050000	245470000	107270000	58774000	96926000	75770000	39918000	22290000	52267000	64971000	7.02615e-06	4.49473e-06	5.88866e-06	1.72921e-06	4.27002e-06	9.58204e-06	3.7692e-06	8.84989e-06	3.08556e-06	7.27438e-06	1.10531e-05	1.49852e-05	6.95314e-06	3.98984e-06	7.00811e-06	5.80609e-06	2.88412e-06	1.96603e-06	4.18752e-06	4.83106e-06	0.424541	0.271585	0.35581	0.104484	0.258007	0.578975	0.227746	0.534736	0.186439
A0A0J9YX35	311300000	295200000	308030000	227320000	246710000	709340000	201680000	345350000	290210000	143380000	141290000	1023400000	977390000	176590000	113630000	560380000	619390000	380110000	17072000	561440000	1.90792e-05	1.83129e-05	2.03908e-05	1.60122e-05	1.84992e-05	4.1781e-05	1.39791e-05	2.52108e-05	1.74285e-05	1.01975e-05	9.405e-06	6.24753e-05	6.33535e-05	1.19877e-05	8.21587e-06	4.29407e-05	4.47516e-05	3.35267e-05	1.36777e-06	4.17471e-05	1.48801	1.42824	1.5903	1.24881	1.44277	3.25854	1.09025	1.96622	1.35927
P14866	0	0	0	0	32085000	12504000	0	27296000	1626900	10922000	16437000	88464000	23790000	8480900	4967500	0	3378700	5810800	6733600	3005000	0	0	0	0	2.40585e-06	7.365e-07	0	1.99263e-06	9.77033e-08	7.76797e-07	1.09413e-06	5.40045e-06	1.54204e-06	5.75721e-07	3.59169e-07	0	2.44115e-07	5.12527e-07	5.39482e-07	2.23443e-07	0	0	0	0	0.037514	0.0114841	0	0.0310708	0.00152347
A0A075B6Q5	40528000	59824000	71284000	0	49650000	498470000	274180000	359890000	556510000	389860000	398730000	530760000	508720000	331400000	384160000	200260000	191980000	103070000	0	180970000	2.48391e-06	3.71122e-06	4.71881e-06	0	3.72294e-06	2.93605e-05	1.90044e-05	2.62723e-05	3.34212e-05	2.77277e-05	2.65415e-05	3.24012e-05	3.29747e-05	2.24969e-05	2.77762e-05	1.53455e-05	1.38708e-05	9.09104e-06	0	1.34564e-05	0.192686	0.287893	0.366055	0	0.288801	2.27759	1.47423	2.03803	2.5926
A0A0C4DH43	843360000	900760000	1089800000	128810000	456290000	1108500000	528390000	501530000	1024600000	660600000	2178900000	2117300000	2264100000	1728300000	1127000000	306450000	522920000	74196000	86275000	276950000	5.16886e-05	5.58793e-05	7.21419e-05	9.07326e-06	3.42143e-05	6.5292e-05	3.66245e-05	3.66121e-05	6.15323e-05	4.69833e-05	0.000145039	0.000129254	0.000146757	0.000117325	8.14863e-05	2.34826e-05	3.77815e-05	6.54428e-06	6.91217e-06	2.05932e-05	3.88285	4.19766	5.41931	0.681585	2.57018	4.90474	2.75124	2.75031	4.62232
P01704	1435900000	2845500000	2020500000	2309000000	1878300000	1312800000	881500000	684400000	1418900000	413180000	747130000	2004600000	2141900000	880800000	1063900000	457030000	747460000	325340000	582840000	508910000	8.80047e-05	0.000176523	0.000133752	0.000162644	0.000140842	7.73255e-05	6.10998e-05	4.99617e-05	8.52119e-05	2.93863e-05	4.97328e-05	0.000122374	0.000138836	5.97926e-05	7.69239e-05	3.50212e-05	5.40048e-05	2.86958e-05	4.66959e-05	3.78411e-05	6.98616	14.0131	10.6178	12.9113	11.1806	6.1384	4.85035	3.96616	6.76446
P13645	5227000	26893000	2137700	1712500	2729200	5108200	2600000	1321700	2977300	3420500	15367000	4571500	1602200	2755000	6723400	6413300	2830800	9863100	7875300	7072100	3.20357e-07	1.66833e-06	1.4151e-07	1.20627e-07	2.04645e-07	3.00879e-07	1.80215e-07	9.64851e-08	1.78802e-07	2.43273e-07	1.02291e-06	2.79076e-07	1.03853e-07	1.87021e-07	4.86127e-07	4.91437e-07	2.04528e-07	8.6995e-07	6.30952e-07	5.25862e-07	0.00544584	0.0283603	0.00240557	0.00205057	0.00347882	0.00511473	0.00306353	0.00164018	0.0030395
P27797	220770000	281180000	212240000	515410000	269220000	411120000	492350000	324760000	421290000	194420000	306050000	584510000	415450000	148090000	176620000	254360000	206510000	310520000	213960000	381910000	1.35307e-05	1.74432e-05	1.40497e-05	3.6305e-05	2.01871e-05	2.42155e-05	3.41265e-05	2.37077e-05	2.53005e-05	1.38276e-05	2.03723e-05	3.56825e-05	2.69291e-05	1.0053e-05	1.27703e-05	1.9491e-05	1.49206e-05	2.73887e-05	1.7142e-05	2.83978e-05	0.281065	0.362336	0.291846	0.754139	0.419333	0.503011	0.708886	0.492465	0.525551
Q14515	79241000	5473700	12544000	5314400	20795000	47435000	51950000	34598000	52066000	40940000	50281000	28179000	59324000	35903000	47238000	29910000	8910800	29610000	49296000	31232000	4.85659e-06	3.39565e-07	8.3038e-07	3.74341e-07	1.55928e-06	2.79398e-06	3.60083e-06	2.52568e-06	3.12682e-06	2.91174e-06	3.34696e-06	1.72024e-06	3.84532e-06	2.43725e-06	3.41548e-06	2.29194e-06	6.43815e-07	2.61168e-06	3.94949e-06	2.32232e-06	0.0645763	0.00451507	0.0110413	0.00497748	0.0207332	0.0371505	0.047879	0.0335831	0.0415762
P55056	235600000	357450000	372720000	230990000	254320000	372000000	301800000	915950000	365070000	893690000	593100000	559340000	592520000	501490000	574060000	366530000	294660000	536510000	347850000	481120000	1.44397e-05	2.21747e-05	2.46731e-05	1.62707e-05	1.90698e-05	2.19112e-05	2.09188e-05	6.68651e-05	2.19242e-05	6.35612e-05	3.94798e-05	3.41459e-05	3.84066e-05	3.40433e-05	4.15067e-05	2.80864e-05	2.12895e-05	4.73215e-05	2.7869e-05	3.57747e-05	0.992211	1.52372	1.6954	1.11803	1.31037	1.50562	1.43742	4.59459	1.50651
Q86U17	118880000	155730000	135470000	144780000	114580000	224560000	205040000	159820000	190090000	196070000	225050000	413810000	307700000	329590000	240320000	143400000	152580000	138010000	121170000	162380000	7.28602e-06	9.66082e-06	8.96776e-06	1.01982e-05	8.59162e-06	1.32268e-05	1.4212e-05	1.1667e-05	1.14158e-05	1.39449e-05	1.49805e-05	2.52618e-05	1.99448e-05	2.2374e-05	1.7376e-05	1.09884e-05	1.10241e-05	1.21728e-05	9.70788e-06	1.20741e-05	0.155058	0.205597	0.190848	0.217033	0.182843	0.281488	0.302454	0.248292	0.242947
P01715	534500000	468690000	522530000	538570000	521650000	209030000	277720000	297630000	300430000	244640000	605000000	723260000	496920000	455310000	457990000	367310000	545160000	241480000	244880000	219990000	3.27589e-05	2.90755e-05	3.45901e-05	3.79364e-05	3.91152e-05	1.23121e-05	1.92497e-05	2.17272e-05	1.80423e-05	1.73993e-05	4.02719e-05	4.41527e-05	3.22099e-05	3.09084e-05	3.31144e-05	2.81462e-05	3.93884e-05	2.12991e-05	1.96193e-05	1.63578e-05	2.66419	2.36463	2.81312	3.08526	3.18113	1.00131	1.56553	1.76702	1.46733
P06454	0	23278000	1614600	2433000	418830000	47055000	81978000	100700000	49721000	69760000	35457000	415020000	126710000	48238000	59478000	683670	0	1087300	47954000	0	0	1.44407e-06	1.06882e-07	1.71378e-07	3.14054e-05	2.7716e-06	5.68218e-06	7.35118e-06	2.98599e-06	4.96148e-06	2.3602e-06	2.53357e-05	8.21322e-06	3.27461e-06	4.30048e-06	5.23881e-08	0	9.59026e-08	3.84197e-06	0	0	0.118337	0.00875869	0.0140439	2.57358	0.227124	0.465638	0.602408	0.244693
P18065	87582000	124090000	98498000	159840000	116250000	82435000	70391000	52321000	113170000	40473000	103700000	176550000	184080000	85389000	123240000	119280000	126340000	106280000	115140000	125320000	5.3678e-06	7.69801e-06	6.52031e-06	1.1259e-05	8.71685e-06	4.85552e-06	4.87904e-06	3.81947e-06	6.79642e-06	2.87853e-06	6.90281e-06	1.07778e-05	1.19319e-05	5.79658e-06	8.91071e-06	9.14016e-06	9.1282e-06	9.37417e-06	9.22477e-06	9.31845e-06	0.154185	0.221118	0.18729	0.323404	0.250383	0.13947	0.140146	0.109711	0.195221
A0A0B4J1V0	3401300000	3652300000	3979600000	3970600000	2950300000	2545700000	2389300000	905350000	2992500000	855700000	2975200000	2864300000	3221000000	2765200000	1760700000	1973100000	3542500000	1283200000	1925700000	3431600000	0.000208462	0.000226573	0.000263439	0.000279685	0.000221224	0.000149945	0.000165611	6.60913e-05	0.000179714	6.08593e-05	0.000198045	0.000174856	0.000208782	0.000187714	0.000127305	0.000151194	0.00025595	0.000113181	0.000154283	0.000255164	16.1273	17.5285	20.3806	21.6374	17.1147	11.6002	12.8122	5.11305	13.9033
P10124	252010000	95907000	117380000	271000000	108190000	81329000	66447000	74549000	146860000	75082000	193010000	194420000	194170000	177090000	107100000	26014000	61186000	22713000	24928000	0	1.54454e-05	5.94966e-06	7.77025e-06	1.9089e-05	8.11248e-06	4.79037e-06	4.60567e-06	5.44214e-06	8.81967e-06	5.34e-06	1.28477e-05	1.18687e-05	1.25859e-05	1.20216e-05	7.74373e-06	1.9934e-06	4.42076e-06	2.00334e-06	1.99718e-06	0	0.874994	0.337053	0.440191	1.08141	0.459578	0.271379	0.260915	0.308301	0.499641
Q6IS14	0	7282400	20394000	0	200280000	10387000	15024000	12948000	3343300	72644000	35351000	135460000	22676000	0	5795900	0	0	1484800	4361600	0	0	4.51769e-07	1.35003e-06	0	1.50177e-05	6.11807e-07	1.04137e-06	9.45214e-07	2.00782e-07	5.1666e-06	2.35315e-06	8.26941e-06	1.46984e-06	0	4.19065e-07	0	0	1.30963e-07	3.49442e-07	0	0	0.0269343	0.0804883	0	0.895351	0.0364757	0.0620858	0.0563533	0.0119705
P67809	0	1621900	1335600	1387900	58646000	9183100	10197000	21951000	2890500	35472000	16255000	53213000	9311300	2403800	4539300	727390	1089400	2080900	2648700	2211400	0	1.00616e-07	8.84132e-08	9.77624e-08	4.39749e-06	5.40895e-07	7.06789e-07	1.60244e-06	1.73589e-07	2.52285e-06	1.08202e-06	3.24849e-06	6.03549e-07	1.6318e-07	3.28208e-07	5.57383e-08	7.87103e-08	1.83541e-07	2.12208e-07	1.64434e-07	0	0.00280079	0.00246112	0.00272137	0.122411	0.0150567	0.0196746	0.0446064	0.00483211
A0A0C4DH34	6770900000	9119800000	6905300000	7019200000	5135300000	6829100000	4310000000	2570300000	5067600000	3035600000	5082300000	6353800000	7900900000	8577700000	4928000000	1961800000	4266300000	1419700000	1636900000	2435000000	0.000414981	0.000565753	0.000457113	0.000494426	0.000385063	0.000402242	0.000298741	0.000187634	0.000304334	0.000215899	0.000338304	0.000387879	0.000512129	0.000582292	0.000356313	0.000150328	0.000308245	0.000125221	0.000131145	0.00018106	31.62	43.1083	34.8303	37.6734	29.3404	30.6493	22.763	14.297	23.1891
P0DP09	53383000	0	36359000	105470000	50402000	4399900000	2866200000	2083300000	3826200000	2818400000	0	32887000	3573600	2182500	0	26103000	50893000	16696000	25077000	43309000	3.27178e-06	0	2.40687e-06	7.42921e-06	3.77932e-06	0.000259159	0.000198666	0.000152083	0.000229782	0.000200451	0	2.00765e-06	2.31637e-07	1.48158e-07	0	2.00022e-06	3.67708e-06	1.47263e-06	2.00912e-06	3.22034e-06	0.260306	0	0.191493	0.591074	0.300686	20.6189	15.806	12.0998	18.2817
P01594	1805900000	4258000000	4526700000	266010000	3615900000	5239300000	5022100000	992760000	4958700000	4357100000	1475900000	5438500000	4782500000	4693000000	3975200000	1728700000	6090000000	1832000000	2294900000	1759500000	0.000110682	0.000264148	0.000299656	1.87375e-05	0.000271133	0.000308601	0.000348099	7.24723e-05	0.000297794	0.000309887	9.82436e-05	0.000332003	0.000309997	0.000318581	0.000287422	0.000132466	0.000440009	0.000161587	0.000183863	0.000130832	8.61469	20.5595	23.3231	1.4584	21.1032	24.0194	27.0936	5.64074	23.1783
P01742	5452300000	8088600000	5095800000	8134500000	6291000000	5640800000	4616700000	3156500000	5038100000	3421700000	3975800000	5353400000	5800700000	3914600000	4297200000	4837000000	4934300000	4023300000	4406100000	5038700000	0.000334165	0.000501782	0.000337329	0.000572987	0.000471722	0.00033225	0.000319999	0.000230427	0.000302563	0.000243359	0.00026465	0.000326808	0.000375996	0.00026574	0.000310704	0.000370649	0.000356509	0.000354865	0.000353007	0.000374664	26.3974	39.6384	26.6473	45.2632	37.2638	26.2461	25.2784	18.2026	23.901
P24592	73181000	127120000	96365000	121930000	159090000	206040000	178290000	122590000	216950000	152730000	162010000	245800000	135320000	159650000	181860000	120090000	107450000	103280000	103560000	126620000	4.48518e-06	7.88598e-06	6.37911e-06	8.58864e-06	1.19291e-05	1.2136e-05	1.23579e-05	8.94917e-06	1.30289e-05	1.08625e-05	1.07842e-05	1.50053e-05	8.77131e-06	1.08377e-05	1.31492e-05	9.20223e-06	7.76338e-06	9.10956e-06	8.29701e-06	9.41511e-06	0.177126	0.311428	0.25192	0.339177	0.471098	0.479267	0.48803	0.353415	0.514529
A0A0B4J1X5	37517000000	31066000000	33227000000	24287000000	22294000000	29915000000	20017000000	18887000000	31223000000	21407000000	21163000000	22957000000	25827000000	19467000000	13508000000	21823000000	23835000000	19571000000	22683000000	29374000000	0.00229937	0.0019272	0.00219954	0.00171075	0.00167168	0.00176203	0.00138745	0.00137877	0.00187509	0.00152251	0.00140872	0.00140145	0.00167408	0.00132151	0.000976679	0.00167225	0.00172211	0.00172621	0.00181731	0.00218417	179.093	150.105	171.317	133.247	130.204	137.24	108.065	107.389	146.047
A0A0C4DH33	0	11892000	18620000	36637000	34269000	51068000	51852000	78394000	43873000	27167000	266850000	286820000	417860000	240480000	236820000	95862000	182710000	49849000	114940000	74864000	0	7.37728e-07	1.2326e-06	2.58068e-06	2.56961e-06	3.00797e-06	3.59404e-06	5.72282e-06	2.63479e-06	1.93218e-06	1.77629e-05	1.75095e-05	2.70853e-05	1.63248e-05	1.7123e-05	7.34569e-06	1.3201e-05	4.39681e-06	9.20875e-06	5.56668e-06	0	0.0575272	0.0961163	0.201238	0.200375	0.234558	0.280259	0.446259	0.205458
P01615	1909000000	1447300000	1707100000	619920000	597210000	244040000	150720000	19739000	123480000	225440000	910030000	980120000	640520000	947830000	341120000	1002600000	2890900000	1458200000	2069100000	1993300000	0.000117	8.97843e-05	0.000113006	4.36666e-05	4.4781e-05	1.43742e-05	1.04469e-05	1.44096e-06	7.41558e-06	1.60338e-05	6.05763e-05	5.98332e-05	4.15179e-05	6.43429e-05	2.46642e-05	7.6827e-05	0.000208871	0.000128617	0.000165772	0.000148216	9.0299	6.9294	8.72158	3.37012	3.45612	1.10938	0.806276	0.111211	0.572322
Q09666	9618400000	288890000	393270000	351600000	220370000	483030000	354760000	345770000	291290000	408590000	1352500000	690920000	484710000	4159400000	487650000	343760000	326020000	351540000	2873400000	80908000	0.000589501	1.79215e-05	2.60334e-05	2.47664e-05	1.65241e-05	2.8451e-05	2.45896e-05	2.52415e-05	1.74934e-05	2.90598e-05	9.00294e-05	4.21785e-05	3.14184e-05	0.000282358	3.52589e-05	2.63416e-05	2.35553e-05	3.10067e-05	0.000230211	6.01609e-06	0.937069	0.028488	0.0413827	0.0393686	0.0262667	0.0452257	0.0390876	0.0401238	0.0278075
Q14623	25059000	60395000	100060000	160920000	117330000	28018000	21570000	18863000	39708000	18290000	31306000	39794000	32398000	28824000	5858300	42130000	38735000	38965000	17056000	34644000	1.53584e-06	3.74665e-06	6.62371e-06	1.13351e-05	8.79783e-06	1.65029e-06	1.49509e-06	1.37701e-06	2.38466e-06	1.30083e-06	2.08389e-06	2.4293e-06	2.10001e-06	1.9567e-06	4.23577e-07	3.22833e-06	2.79865e-06	3.43681e-06	1.36649e-06	2.57603e-06	0.0339412	0.0827988	0.14638	0.250499	0.194427	0.0364706	0.0330407	0.0304312	0.0526997
P20930	1309900	8145100	1045100	3092700	1751000	17475000	7083500	12667000	24924000	3389500	6263300	0	0	3178100	924610	15066000	2702200	30448000	6398700	7982600	8.02823e-08	5.05287e-07	6.91829e-08	2.17847e-07	1.31296e-07	1.0293e-06	4.90982e-07	9.24701e-07	1.49681e-06	2.41069e-07	4.16918e-07	0	0	2.15743e-07	6.68527e-08	1.15447e-06	1.95237e-07	2.68559e-06	5.1265e-07	5.93564e-07	0.000184489	0.00116115	0.000158983	0.000500613	0.00030172	0.00236533	0.00112828	0.00212497	0.00343967
Q9H8L6	67204000	84846000	62907000	59238000	58467000	79404000	51029000	47860000	70215000	44967000	45344000	43859000	35735000	30473000	43068000	52375000	49078000	48330000	42612000	37498000	4.11886e-06	5.26348e-06	4.16428e-06	4.17267e-06	4.38407e-06	4.67699e-06	3.537e-06	3.49382e-06	4.21676e-06	3.19815e-06	3.01833e-06	2.67745e-06	2.31631e-06	2.06864e-06	3.11398e-06	4.01338e-06	3.54594e-06	4.26283e-06	3.41398e-06	2.78825e-06	0.0394489	0.0504116	0.0398839	0.0399643	0.041989	0.0447945	0.033876	0.0334625	0.0403865
P02794	9996700	16770000	13100000	11537000	217120000	39101000	15376000	28017000	15469000	59958000	29826000	155140000	35707000	10257000	19412000	9301000	21242000	19229000	21208000	21563000	6.12686e-07	1.04034e-06	8.67186e-07	8.12656e-07	1.62804e-05	2.3031e-06	1.06576e-06	2.04526e-06	9.2899e-07	4.26434e-06	1.98537e-06	9.47081e-06	2.31449e-06	6.9629e-07	1.40356e-06	7.12715e-07	1.53476e-06	1.69605e-06	1.69914e-06	1.60336e-06	0.0288663	0.0490148	0.0408568	0.0382877	0.767041	0.108509	0.0502127	0.096361	0.0437686
O14498	102390000	97557000	94522000	60490000	54975000	83352000	56668000	61770000	89654000	58567000	115070000	65723000	80512000	81760000	88354000	38874000	55408000	59222000	75937000	61388000	6.27536e-06	6.05202e-06	6.25711e-06	4.26086e-06	4.12222e-06	4.90953e-06	3.92785e-06	4.50926e-06	5.38416e-06	4.16541e-06	7.65966e-06	4.01218e-06	5.21871e-06	5.55023e-06	6.38832e-06	2.97883e-06	4.00329e-06	5.22353e-06	6.08391e-06	4.56464e-06	0.13643	0.131574	0.136033	0.0926334	0.0896194	0.106736	0.0853937	0.0980338	0.117055
Q6NXT2	194510000	227820000	183810000	91763000	202360000	342720000	142360000	411810000	169050000	475630000	306960000	417280000	355710000	135530000	56974000	42915000	94167000	62511000	85902000	86075000	1.19213e-05	1.4133e-05	1.21677e-05	6.4637e-06	1.51737e-05	2.01866e-05	9.86746e-06	3.00625e-05	1.01523e-05	3.38279e-05	2.04329e-05	2.54736e-05	2.30568e-05	9.20037e-06	4.11943e-06	3.28848e-06	6.80367e-06	5.51363e-06	6.88229e-06	6.4003e-06	0.783574	0.928945	0.799773	0.424852	0.99735	1.32684	0.648578	1.97597	0.667299
P62987	62944000	109860000	147260000	84755000	832350000	111920000	137230000	182980000	112390000	290660000	156730000	413190000	217870000	101500000	134200000	136800000	65792000	40468000	92500000	87431000	3.85777e-06	6.81524e-06	9.74823e-06	5.97006e-06	6.24126e-05	6.59222e-06	9.51188e-06	1.33577e-05	6.74957e-06	2.06724e-05	1.04328e-05	2.52239e-05	1.41221e-05	6.89026e-06	9.70316e-06	1.04827e-05	4.75354e-06	3.56938e-06	7.4109e-06	6.50113e-06	0.261934	0.46274	0.661884	0.405355	4.23768	0.447598	0.645837	0.906959	0.458282
Q9Y5Y7	5071700	7394700	22567000	0	5875100	61695000	136520000	82027000	71787000	68940000	17470000	24032000	51552000	78296000	50698000	28226000	7967700	21487000	20882000	39546000	3.10839e-07	4.58735e-07	1.49388e-06	0	4.40536e-07	3.63391e-06	9.46267e-06	5.98804e-06	4.31116e-06	4.90316e-06	1.16289e-06	1.46708e-06	3.34155e-06	5.31508e-06	3.66565e-06	2.1629e-06	5.75675e-07	1.89521e-06	1.67302e-06	2.94053e-06	0.00882738	0.0130274	0.042424	0	0.0125106	0.103198	0.268727	0.170052	0.122431
P19320	120940000	82665000	42248000	52543000	70475000	28154000	49125000	45241000	43498000	52112000	117290000	64105000	111930000	84630000	131310000	123760000	148400000	74545000	67425000	111260000	7.41227e-06	5.12818e-06	2.79671e-06	3.70108e-06	5.28447e-06	1.6583e-06	3.40502e-06	3.30263e-06	2.61227e-06	3.70632e-06	7.80743e-06	3.91341e-06	7.25519e-06	5.74506e-06	9.4942e-06	9.48345e-06	1.07221e-05	6.57506e-06	5.40195e-06	8.27298e-06	0.0911999	0.0630967	0.0344104	0.0455378	0.0650196	0.0204036	0.0418951	0.0406352	0.0321411
P19883	42353000	96430000	124200000	131320000	103850000	72530000	58889000	0	66932000	22019000	92977000	59982000	90413000	132030000	162130000	105610000	95601000	75088000	92286000	127880000	2.59577e-06	5.9821e-06	8.22172e-06	9.25006e-06	7.78705e-06	4.2721e-06	4.0818e-06	0	4.0196e-06	1.56604e-06	6.18903e-06	3.66171e-06	5.86048e-06	8.96277e-06	1.17226e-05	8.09266e-06	6.90728e-06	6.62295e-06	7.39376e-06	9.5088e-06	0.0682971	0.157395	0.216321	0.243378	0.204885	0.112403	0.107396	0	0.105759
P26022	42351000	27570000	50021000	63410000	23875000	68268000	15340000	27996000	34879000	10470000	91633000	188850000	96085000	52702000	47112000	71445000	56225000	50713000	80075000	101450000	2.59564e-06	1.71032e-06	3.31126e-06	4.46654e-06	1.79023e-06	4.02107e-06	1.06327e-06	2.04373e-06	2.09466e-06	7.44649e-07	6.09957e-06	1.15287e-05	6.22814e-06	3.57764e-06	3.40637e-06	5.47467e-06	4.06232e-06	4.47302e-06	6.41544e-06	7.54354e-06	0.0618379	0.0407463	0.0788865	0.10641	0.04265	0.0957967	0.025331	0.0486892	0.0499025
A0A0B4J1Y8	1134900000	1305600000	1377600000	1032500000	1092000000	66478000	81336000	47169000	99594000	27995000	59749000	51234000	64486000	44329000	84655000	668580000	941280000	636110000	682860000	984870000	6.95567e-05	8.09938e-05	9.11935e-05	7.27284e-05	8.18821e-05	3.91563e-06	5.63768e-06	3.44337e-06	5.98111e-06	1.99107e-06	3.9772e-06	3.12767e-06	4.17992e-06	3.00925e-06	6.12087e-06	5.12318e-05	6.80085e-05	5.61065e-05	5.47093e-05	7.32322e-05	5.34066	6.21881	7.00196	5.58418	6.28702	0.300647	0.432868	0.264387	0.459238
Q8IWY4	250590000	74162000	75908000	11110000	50331000	7467600	38428000	2539900	71714000	0	57254000	94641000	40178000	4663200	32317000	40539000	60694000	16602000	33954000	0	1.53584e-05	4.60069e-06	5.02491e-06	7.82578e-07	3.774e-06	4.3985e-07	2.66358e-06	1.85415e-07	4.30678e-06	0	3.81112e-06	5.77753e-06	2.6043e-06	3.16558e-07	2.33664e-06	3.10641e-06	4.38521e-06	1.46434e-06	2.72032e-06	0	0.142326	0.0426345	0.0465658	0.00725214	0.0349736	0.00407609	0.0246833	0.00171823	0.0399108
P27824	0	20588000	20847000	19958000	127440000	52443000	41386000	62801000	14051000	46680000	71620000	274840000	81960000	9929500	9600100	0	0	25519000	17458000	22213000	0	1.27719e-06	1.38002e-06	1.40582e-06	9.55591e-06	3.08895e-06	2.86861e-06	4.58452e-06	8.43832e-07	3.31998e-06	4.7674e-06	1.67781e-05	5.31257e-06	6.74058e-07	6.94123e-07	0	0	2.25084e-06	1.3987e-06	1.6517e-06	0	0.0189026	0.0204244	0.0208064	0.141429	0.0457169	0.0424557	0.0678515	0.0124888
Q03167	38882000	88823000	99779000	86591000	42424000	101830000	51752000	17457000	96234000	42715000	80785000	106050000	109080000	83059000	94855000	69496000	59532000	45143000	50970000	96891000	2.38303e-06	5.5102e-06	6.60511e-06	6.09939e-06	3.18111e-06	5.99791e-06	3.58711e-06	1.27437e-06	5.77933e-06	3.03798e-06	5.37747e-06	6.47402e-06	7.07046e-06	5.63841e-06	6.85837e-06	5.32532e-06	4.30125e-06	3.98173e-06	4.08361e-06	7.20454e-06	0.0254875	0.0589338	0.0706444	0.0652355	0.0340232	0.0641501	0.0383656	0.01363	0.0618123
A0A0J9YXX1	233950000	232200000	227880000	177660000	167270000	74028000	42036000	50298000	81937000	35672000	1306400000	1320400000	1123600000	1220900000	156050000	276850000	311920000	269810000	236150000	307010000	1.43385e-05	1.44047e-05	1.50851e-05	1.25142e-05	1.25425e-05	4.36034e-06	2.91366e-06	3.67179e-06	4.92072e-06	2.53707e-06	8.69608e-05	8.06062e-05	7.28306e-05	8.288e-05	1.1283e-05	2.12144e-05	2.25366e-05	2.37979e-05	1.89198e-05	2.28284e-05	1.12265	1.12783	1.1811	0.979816	0.982032	0.341398	0.228129	0.287488	0.385274
P15880	0	0	0	8182400	158710000	49114000	944160	44391000	0	103320000	87109000	409690000	87166000	0	25049000	2681100	2290600	0	14384000	14685000	0	0	0	5.76361e-07	1.19007e-05	2.89287e-06	6.5443e-08	3.24058e-06	0	7.34835e-06	5.79843e-06	2.50103e-05	5.65001e-06	0	1.81114e-06	2.05447e-07	1.65498e-07	0	1.15242e-06	1.09194e-06	0	0	0	0.0184	0.379921	0.0923532	0.00208923	0.103454	0
P07359	154970000	160890000	150710000	20257000	23780000	284380000	186180000	293110000	230880000	554470000	137510000	156780000	116970000	112260000	134200000	45132000	56275000	63586000	64295000	87724000	9.49793e-06	9.98092e-06	9.97661e-06	1.42688e-06	1.78311e-06	1.67503e-05	1.29048e-05	2.13973e-05	1.38655e-05	3.94351e-05	9.15338e-06	9.57092e-06	7.58188e-06	7.6207e-06	9.70316e-06	3.45837e-06	4.06593e-06	5.60845e-06	5.15118e-06	6.52291e-06	0.132766	0.139517	0.139457	0.0199455	0.024925	0.234142	0.180388	0.299099	0.193817
P30101	152130000	88644000	60982000	42162000	213220000	80838000	30847000	31262000	103060000	22841000	70464000	400280000	204840000	0	0	0	0	0	11008000	0	9.32387e-06	5.49909e-06	4.03685e-06	2.96985e-06	1.5988e-05	4.76145e-06	2.13811e-06	2.28215e-06	6.18926e-06	1.6245e-06	4.69045e-06	2.44358e-05	1.32775e-05	0	0	0	0	0	8.81938e-07	0	0.164205	0.0968457	0.0710938	0.0523027	0.281568	0.083855	0.0376548	0.0401914	0.109
[truncated: 300 more rows]
[truncated: 11 more columns]

[truncated: 5 more sheets: Table S11, Table S12, Table S13, Table S14, Table S15]
